# Supplementary material
Source: publisher figshare collection journal article supplement (https://wiley.figshare.com/articles/dataset/_/6176210)

## Document information

|                                                       |                                                     |                   |
|-------------------------------------------------------|-----------------------------------------------------|-------------------|
| Software:                                             | realplex 2.2                                        |                   |
| File Name:                                            | Voytek\Runs\RT2PCRRArray ionic strength IS16 092513 |                   |
| Printed by:                                           | Voytek                                              |                   |
| Created:                                              | Sep/25/2013 13:18                                   |                   |
| Serial No. Thermo Module:                             | 6325 30342                                          |                   |
| Serial No. realplex Module.:                          | 630011432                                           |                   |
| Acquisition Start Time:                               | Voytek                                              | Sep/25/2013 14:42 |
| Acquisition End Time:                                 | Voytek                                              | Sep/25/2013 16:33 |
| Last updated:                                         | Voytek                                              | Mar/14/2012 13:10 |
| Background:                                           | SABioscience A Plate                                | Mar/14/2012 10:34 |
| Color Calibration:                                    | SYBR                                                | Jun/23/2011 09:04 |
| RT2PCRRArray ionic strength IS16 092513Quantification |                                                     | Sep/25/2013 16:57 |
| Inverted Data:                                        | OFF                                                 |                   |
| Comment:                                              |                                                     |                   |

## Plate layout

|   | 1    | 2    | 3    | 4    | 5    | 6    | 7    | 8    | 9    | 10   | 11   | 12   |
|---|------|------|------|------|------|------|------|------|------|------|------|------|
| A | IS16 |
| B | IS16 |
| C | IS16 |
| D | IS16 |
| E | IS16 |
| F | IS16 |
| G | IS16 |
| H | IS16 |

## PCR Program

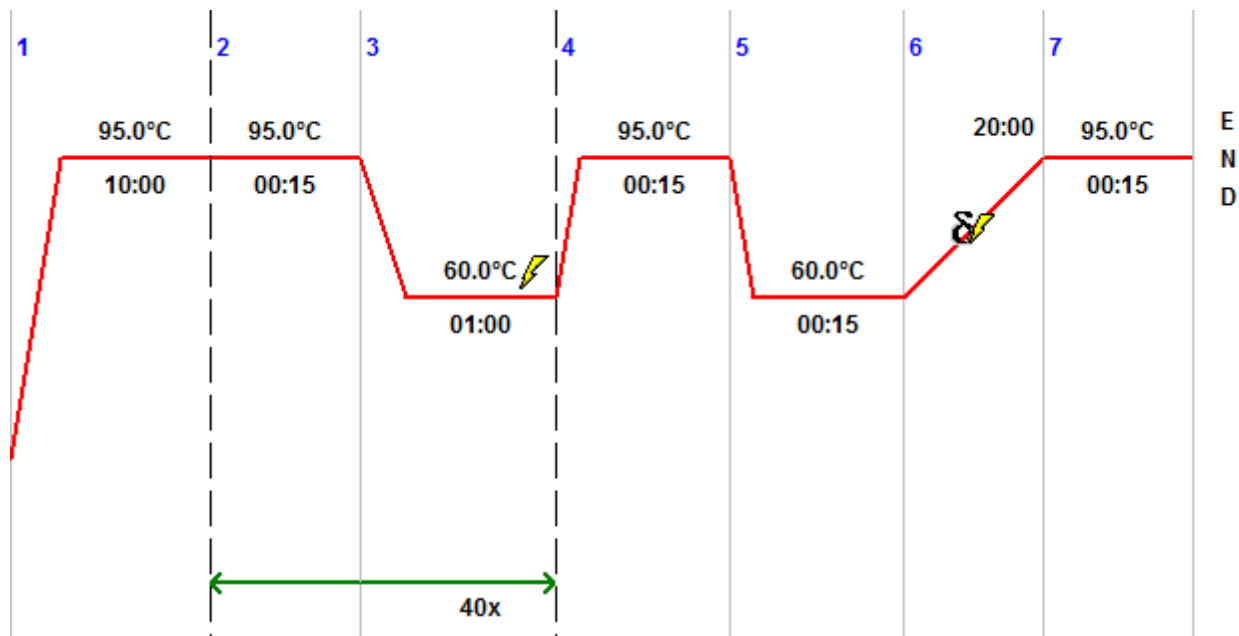

### Program Header

|            |          |                                  |     |
|------------|----------|----------------------------------|-----|
| Lid Temp   | 105 °C   | TSP Heated Lid                   | Yes |
| Temp. Mode | Standard | Switch off lid at low block temp | No  |
| Impulse    | No       | Simulate Mastercycler gradient   | No  |

### Program Details

Step 3 Ramp =26%

## Raw Data SYBR

### Fluorescence Profile

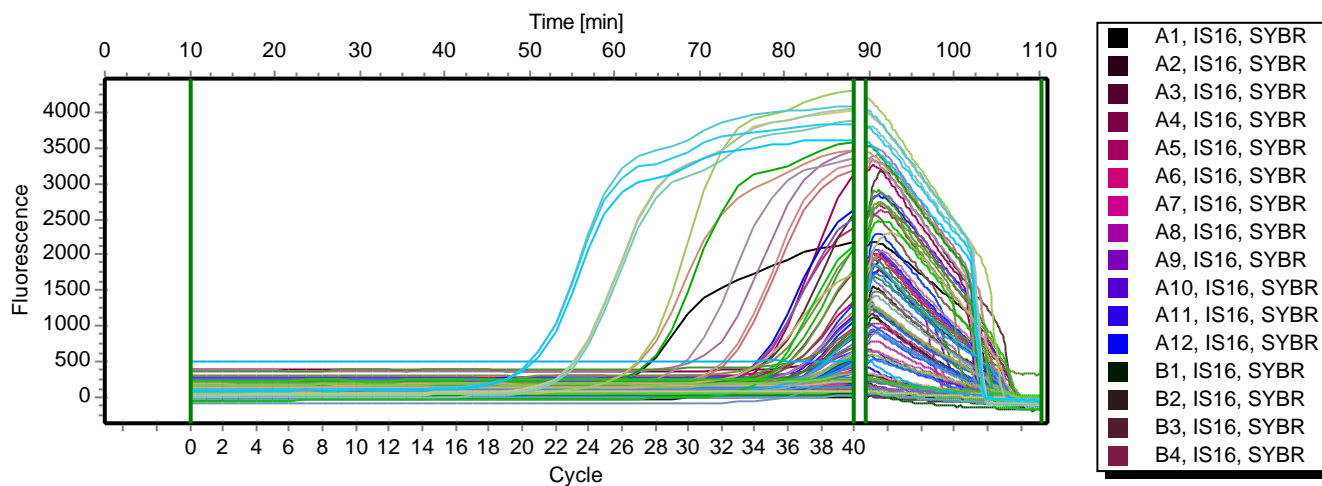

### Temperature Profile

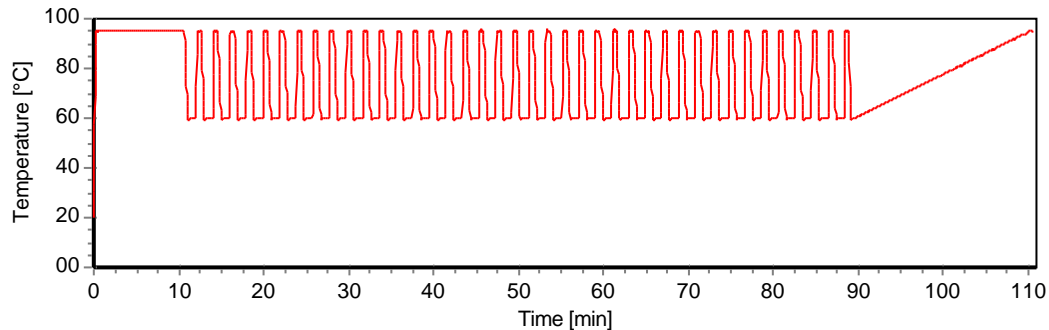

## Quantification SYBR

| Pos | Name | Ct SYBR | Amount SYBR | Target SYBR |
|-----|------|---------|-------------|-------------|
| A1  | IS16 | 24.70   | -           | unknown     |
| A2  | IS16 | 34.99   | -           | unknown     |
| A3  | IS16 | 39.93   | -           | unknown     |
| A4  | IS16 | 36.19   | -           | unknown     |
| A5  | IS16 | 32.58   | -           | unknown     |
| A6  | IS16 | 34.84   | -           | unknown     |
| A7  | IS16 |         | -           | unknown     |
| A8  | IS16 |         | -           | unknown     |
| A9  | IS16 | 35.39   | -           | unknown     |
| A10 | IS16 | 34.76   | -           | unknown     |
| A11 | IS16 |         | -           | unknown     |
| A12 | IS16 | 31.45   | -           | unknown     |
| B1  | IS16 |         | -           | unknown     |
| B2  | IS16 | 35.51   | -           | unknown     |
| B3  | IS16 |         | -           | unknown     |
| B4  | IS16 |         | -           | unknown     |
| B5  | IS16 | 34.19   | -           | unknown     |
| B6  | IS16 | 31.71   | -           | unknown     |
| B7  | IS16 | 35.90   | -           | unknown     |
| B8  | IS16 |         | -           | unknown     |
| B9  | IS16 |         | -           | unknown     |
| B10 | IS16 | 37.05   | -           | unknown     |
| B11 | IS16 | 37.09   | -           | unknown     |
| B12 | IS16 | 34.92   | -           | unknown     |
| C1  | IS16 | 35.77   | -           | unknown     |
| C2  | IS16 |         | -           | unknown     |
| C3  | IS16 | 33.07   | -           | unknown     |
| C4  | IS16 |         | -           | unknown     |
| C5  | IS16 | 34.98   | -           | unknown     |
| C6  | IS16 | 34.97   | -           | unknown     |
| C7  | IS16 | 36.18   | -           | unknown     |
| C8  | IS16 | 36.05   | -           | unknown     |
| C9  | IS16 |         | -           | unknown     |
| C10 | IS16 | 36.01   | -           | unknown     |
| C11 | IS16 | 36.21   | -           | unknown     |
| C12 | IS16 | 34.87   | -           | unknown     |

| Pos                                                                                                                                                                        | Name | Ct SYBR | Amount SYBR | Target SYBR |
|----------------------------------------------------------------------------------------------------------------------------------------------------------------------------|------|---------|-------------|-------------|
|   D1      | IS16 |         | -           | unknown     |
|   D2      | IS16 |         | -           | unknown     |
|   D3      | IS16 | 35.68   | -           | unknown     |
|   D4      | IS16 | 34.66   | -           | unknown     |
|   D5      | IS16 |         | -           | unknown     |
|   D6      | IS16 |         | -           | unknown     |
|   D7      | IS16 | 37.41   | -           | unknown     |
|   D8      | IS16 |         | -           | unknown     |
|   D9      | IS16 | 32.05   | -           | unknown     |
|   D10     | IS16 | 34.99   | -           | unknown     |
|   D11     | IS16 | 36.16   | -           | unknown     |
|   D12     | IS16 |         | -           | unknown     |
|   E1      | IS16 | 35.82   | -           | unknown     |
|   E2      | IS16 | 35.68   | -           | unknown     |
|   E3      | IS16 | 35.07   | -           | unknown     |
|   E4      | IS16 | 35.54   | -           | unknown     |
|   E5      | IS16 |         | -           | unknown     |
|   E6  | IS16 | 30.39   | -           | unknown     |
|   E7  | IS16 | 34.49   | -           | unknown     |
|   E8  | IS16 | 29.83   | -           | unknown     |
|   E9  | IS16 | 35.36   | -           | unknown     |
|   E10 | IS16 |         | -           | unknown     |
|   E11 | IS16 | 37.59   | -           | unknown     |
|   E12 | IS16 | 35.75   | -           | unknown     |
|   F1  | IS16 |         | -           | unknown     |
|   F2  | IS16 | 35.50   | -           | unknown     |
|   F3  | IS16 | 35.56   | -           | unknown     |
|   F4  | IS16 | 33.63   | -           | unknown     |
|   F5  | IS16 | 35.91   | -           | unknown     |
|   F6  | IS16 | 24.99   | -           | unknown     |
|   F7  | IS16 | 29.97   | -           | unknown     |
|   F8  | IS16 | 28.02   | -           | unknown     |
|   F9  | IS16 | 35.32   | -           | unknown     |
|   F10 | IS16 |         | -           | unknown     |
|   F11 | IS16 | 36.49   | -           | unknown     |
|   F12 | IS16 | 35.02   | -           | unknown     |
|   G1  | IS16 | 25.69   | -           | unknown     |
|   G2  | IS16 | 33.97   | -           | unknown     |
|   G3  | IS16 | 34.10   | -           | unknown     |
|   G4  | IS16 |         | -           | unknown     |

| Pos                                                                                                                                                                        | Name | Ct SYBR | Amount SYBR | Target SYBR |
|----------------------------------------------------------------------------------------------------------------------------------------------------------------------------|------|---------|-------------|-------------|
|   G5      | IS16 | 35.67   | -           | unknown     |
|   G6      | IS16 | 32.15   | -           | unknown     |
|   G7      | IS16 |         | -           | unknown     |
|   G8      | IS16 |         | -           | unknown     |
|   G9      | IS16 | 35.39   | -           | unknown     |
|   G10     | IS16 |         | -           | unknown     |
|   G11     | IS16 | 35.12   | -           | unknown     |
|   G12     | IS16 |         | -           | unknown     |
|   H1      | IS16 | 32.89   | -           | unknown     |
|   H2      | IS16 |         | -           | unknown     |
|   H3      | IS16 |         | -           | unknown     |
|   H4      | IS16 | 37.51   | -           | unknown     |
|   H5      | IS16 | 24.81   | -           | unknown     |
|   H6      | IS16 |         | -           | unknown     |
|   H7      | IS16 | 20.78   | -           | unknown     |
|   H8      | IS16 | 20.90   | -           | unknown     |
|   H9      | IS16 | 20.88   | -           | unknown     |
|   H10 | IS16 | 18.44   | -           | unknown     |
|   H11 | IS16 | 18.45   | -           | unknown     |
|   H12 | IS16 | 18.52   | -           | unknown     |

## Amplification Plot

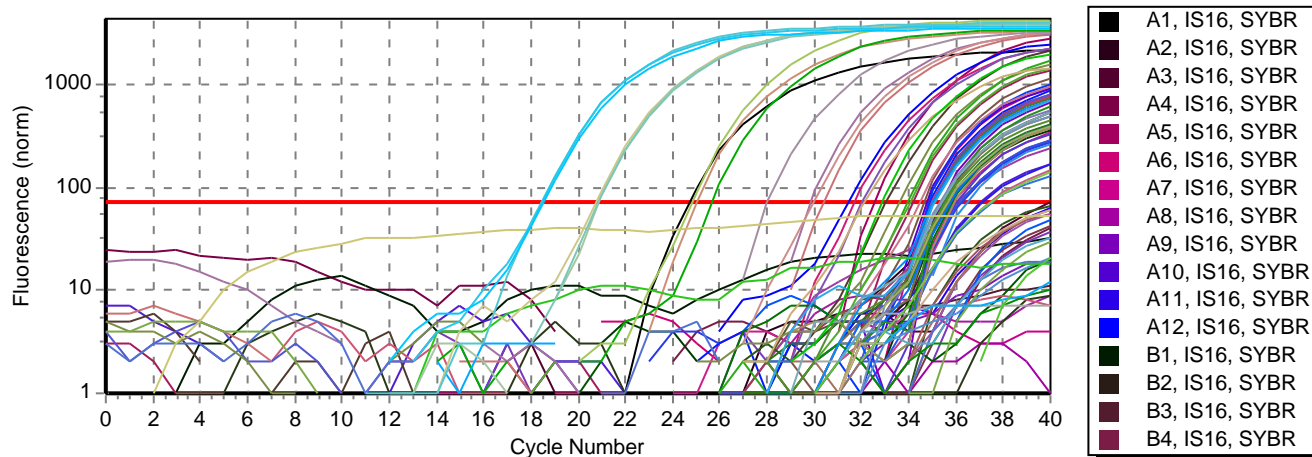

Supplement: Supplementary file 7 [file 1]
