# Supplementary material
Source: publisher figshare collection journal article supplement (https://wiley.figshare.com/articles/dataset/_/6176210)

## Document information

|                                                      |                                                     |                   |
|------------------------------------------------------|-----------------------------------------------------|-------------------|
| Software:                                            | realplex 2.2                                        |                   |
| File Name:                                           | Voytek\Runs\RT2PCRRArray ionic strength IS14 092413 |                   |
| Printed by:                                          | Voytek                                              |                   |
| Created:                                             | Sep/24/2013 14:58                                   |                   |
| Serial No. Thermo Module:                            | 6325 30342                                          |                   |
| Serial No. realplex Module.:                         | 630011432                                           |                   |
| Acquisition Start Time:                              | Voytek                                              | Sep/24/2013 15:57 |
| Acquisition End Time:                                | Voytek                                              | Sep/24/2013 17:48 |
| Last updated:                                        | Voytek                                              | Mar/14/2012 13:10 |
| Background:                                          | SABioscience A Plate                                | Mar/14/2012 10:34 |
| Color Calibration:                                   | SYBR                                                | Jun/23/2011 09:04 |
| RT2PCRRArray ionic strength IS14 09241Quantification |                                                     | Sep/25/2013 08:50 |
| Inverted Data:                                       | OFF                                                 |                   |
| Comment:                                             |                                                     |                   |

## Plate layout

|   | 1    | 2    | 3    | 4    | 5    | 6    | 7    | 8    | 9    | 10   | 11   | 12   |
|---|------|------|------|------|------|------|------|------|------|------|------|------|
| A | IS14 |
| B | IS14 |
| C | IS14 |
| D | IS14 |
| E | IS14 |
| F | IS14 |
| G | IS14 |
| H | IS14 |

## PCR Program

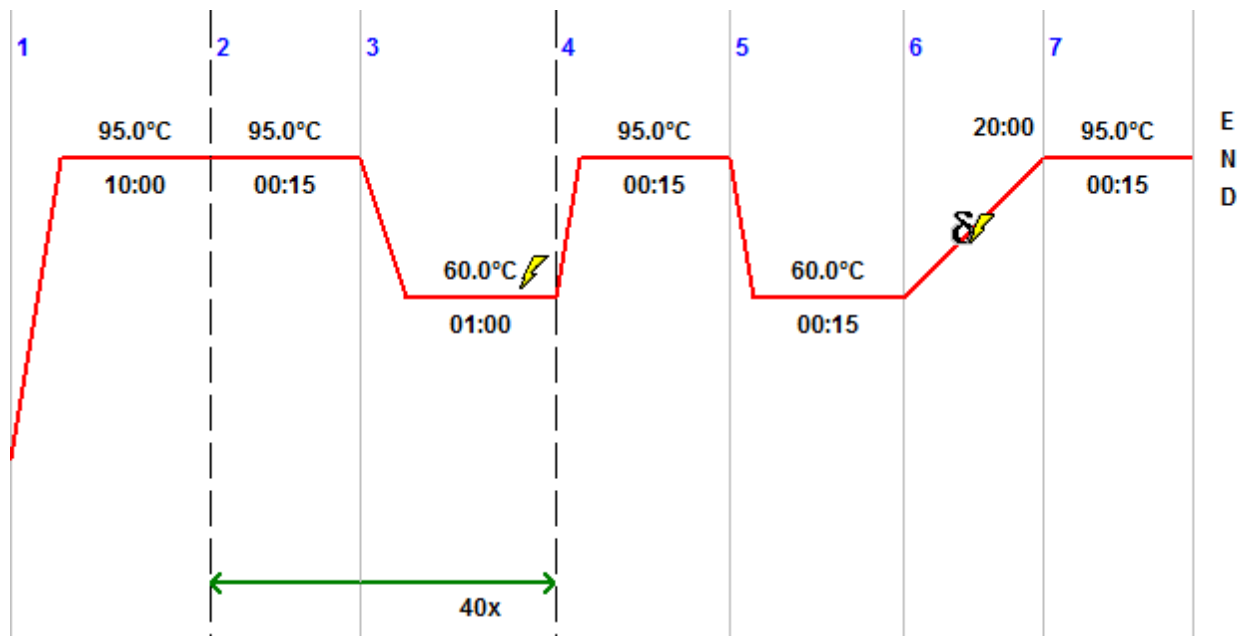

### Program Header

|            |          |                                  |     |
|------------|----------|----------------------------------|-----|
| Lid Temp   | 105 °C   | TSP Heated Lid                   | Yes |
| Temp. Mode | Standard | Switch off lid at low block temp | No  |
| Impulse    | No       | Simulate Mastercycler gradient   | No  |

### Program Details

Step 3 Ramp =26%

## Raw Data SYBR

### Fluorescence Profile

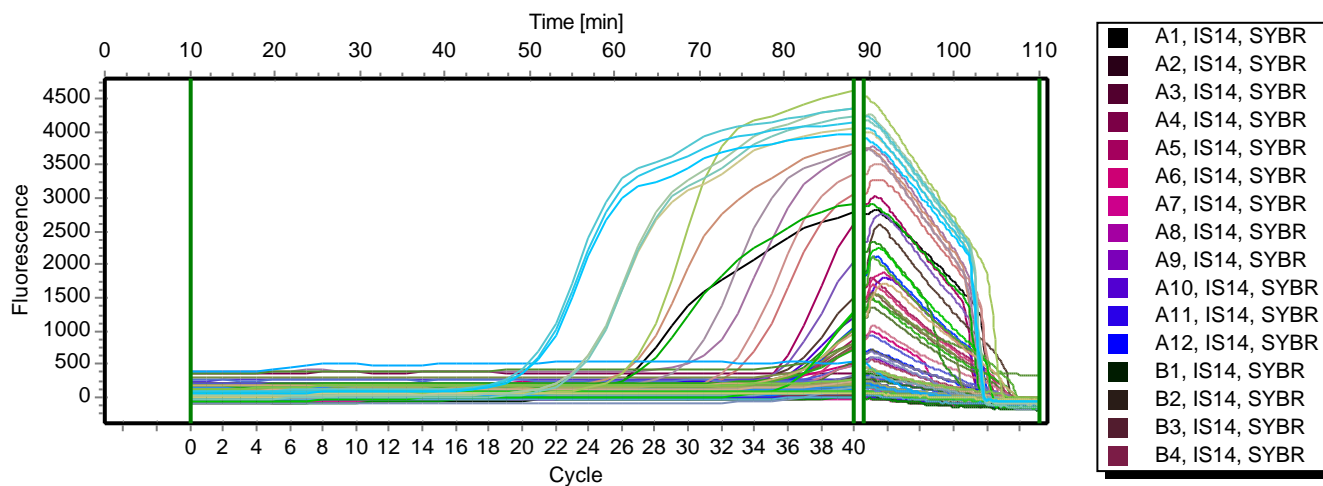

### Temperature Profile

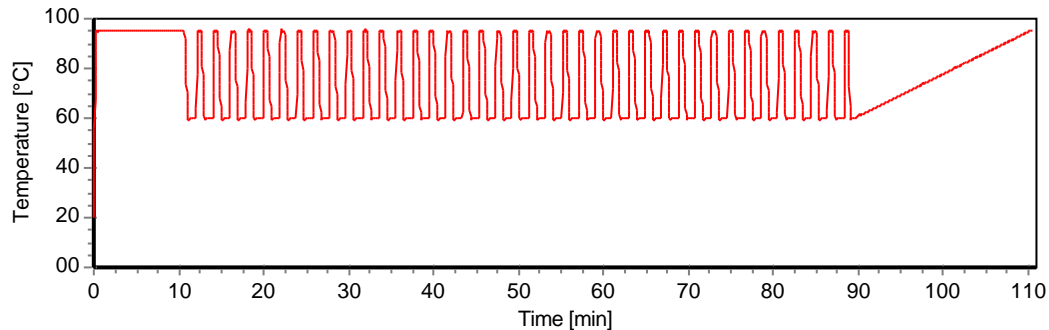

## Quantification SYBR

| Pos                                                                                    | Name | Ct SYBR | Amount SYBR | Target SYBR |
|----------------------------------------------------------------------------------------|------|---------|-------------|-------------|
|  A1    | IS14 | 23.80   | -           | unknown     |
|  A2    | IS14 |         | -           | unknown     |
|  A3    | IS14 |         | -           | unknown     |
|  A4    | IS14 |         | -           | unknown     |
|  A5    | IS14 | 33.19   | -           | unknown     |
|  A6    | IS14 | 36.40   | -           | unknown     |
|  A7    | IS14 |         | -           | unknown     |
|  A8    | IS14 |         | -           | unknown     |
|  A9    | IS14 | 37.34   | -           | unknown     |
|  A10   | IS14 | 33.81   | -           | unknown     |
|  A11   | IS14 |         | -           | unknown     |
|  A12   | IS14 |         | -           | unknown     |
|  B1    | IS14 |         | -           | unknown     |
|  B2    | IS14 |         | -           | unknown     |
|  B3  | IS14 |         | -           | unknown     |
|  B4  | IS14 |         | -           | unknown     |
|  B5  | IS14 | 35.44   | -           | unknown     |
|  B6  | IS14 | 34.72   | -           | unknown     |
|  B7  | IS14 |         | -           | unknown     |
|  B8  | IS14 |         | -           | unknown     |
|  B9  | IS14 |         | -           | unknown     |
|  B10 | IS14 |         | -           | unknown     |
|  B11 | IS14 |         | -           | unknown     |
|  B12 | IS14 | 35.90   | -           | unknown     |
|  C1  | IS14 |         | -           | unknown     |
|  C2  | IS14 |         | -           | unknown     |
|  C3  | IS14 | 34.59   | -           | unknown     |
|  C4  | IS14 |         | -           | unknown     |
|  C5  | IS14 | 37.16   | -           | unknown     |
|  C6  | IS14 | 35.44   | -           | unknown     |
|  C7  | IS14 |         | -           | unknown     |
|  C8  | IS14 | 37.62   | -           | unknown     |
|  C9  | IS14 |         | -           | unknown     |
|  C10 | IS14 |         | -           | unknown     |
|  C11 | IS14 |         | -           | unknown     |
|  C12 | IS14 | 35.19   | -           | unknown     |

| Pos                                                                                                                                                                        | Name | Ct SYBR | Amount SYBR | Target SYBR |
|----------------------------------------------------------------------------------------------------------------------------------------------------------------------------|------|---------|-------------|-------------|
|   D1      | IS14 |         | -           | unknown     |
|   D2      | IS14 | 24.75   | -           | unknown     |
|   D3      | IS14 | 36.73   | -           | unknown     |
|   D4      | IS14 | 35.58   | -           | unknown     |
|   D5      | IS14 |         | -           | unknown     |
|   D6      | IS14 |         | -           | unknown     |
|   D7      | IS14 |         | -           | unknown     |
|   D8      | IS14 |         | -           | unknown     |
|   D9      | IS14 | 33.65   | -           | unknown     |
|   D10     | IS14 | 36.58   | -           | unknown     |
|   D11     | IS14 |         | -           | unknown     |
|   D12     | IS14 |         | -           | unknown     |
|   E1      | IS14 | 38.82   | -           | unknown     |
|   E2      | IS14 |         | -           | unknown     |
|   E3      | IS14 | 35.71   | -           | unknown     |
|   E4      | IS14 | 39.27   | -           | unknown     |
|   E5      | IS14 |         | -           | unknown     |
|   E6  | IS14 | 31.18   | -           | unknown     |
|   E7  | IS14 | 35.93   | -           | unknown     |
|   E8  | IS14 | 29.68   | -           | unknown     |
|   E9  | IS14 | 36.80   | -           | unknown     |
|   E10 | IS14 |         | -           | unknown     |
|   E11 | IS14 |         | -           | unknown     |
|   E12 | IS14 |         | -           | unknown     |
|   F1  | IS14 |         | -           | unknown     |
|   F2  | IS14 | 35.15   | -           | unknown     |
|   F3  | IS14 | 35.92   | -           | unknown     |
|   F4  | IS14 | 35.77   | -           | unknown     |
|   F5  | IS14 | 39.03   | -           | unknown     |
|   F6  | IS14 | 24.73   | -           | unknown     |
|   F7  | IS14 | 30.25   | -           | unknown     |
|   F8  | IS14 | 28.04   | -           | unknown     |
|   F9  | IS14 | 36.24   | -           | unknown     |
|   F10 | IS14 |         | -           | unknown     |
|   F11 | IS14 |         | -           | unknown     |
|   F12 | IS14 |         | -           | unknown     |
|   G1  | IS14 | 24.13   | -           | unknown     |
|   G2  | IS14 | 35.63   | -           | unknown     |
|   G3  | IS14 | 35.04   | -           | unknown     |
|   G4  | IS14 |         | -           | unknown     |

| Pos                                                                                                                                                                        | Name | Ct SYBR | Amount SYBR | Target SYBR |
|----------------------------------------------------------------------------------------------------------------------------------------------------------------------------|------|---------|-------------|-------------|
|   G5      | IS14 |         | -           | unknown     |
|   G6      | IS14 | 34.88   | -           | unknown     |
|   G7      | IS14 | 38.60   | -           | unknown     |
|   G8      | IS14 |         | -           | unknown     |
|   G9      | IS14 | 38.80   | -           | unknown     |
|   G10     | IS14 |         | -           | unknown     |
|   G11     | IS14 |         | -           | unknown     |
|   G12     | IS14 | 7.70    | -           | unknown     |
|   H1      | IS14 | 34.70   | -           | unknown     |
|   H2      | IS14 |         | -           | unknown     |
|   H3      | IS14 |         | -           | unknown     |
|   H4      | IS14 | 39.83   | -           | unknown     |
|   H5      | IS14 | 24.40   | -           | unknown     |
|   H6      | IS14 |         | -           | unknown     |
|   H7      | IS14 | 21.47   | -           | unknown     |
|   H8      | IS14 | 21.42   | -           | unknown     |
|   H9      | IS14 | 21.29   | -           | unknown     |
|   H10 | IS14 | 18.39   | -           | unknown     |
|   H11 | IS14 | 18.55   | -           | unknown     |
|   H12 | IS14 | 18.46   | -           | unknown     |

## Amplification Plot

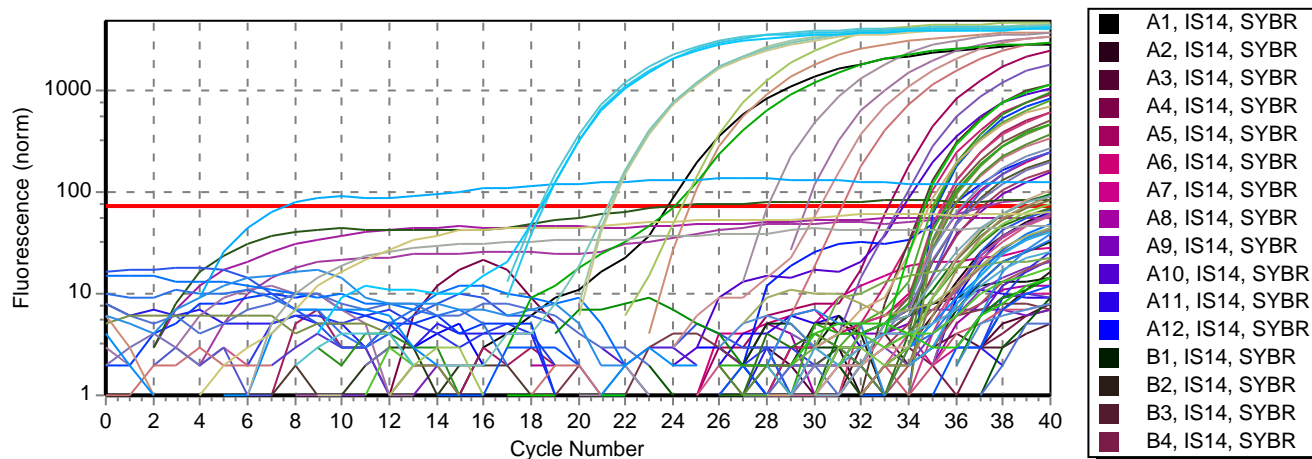

Supplement: Supplementary file 2 [file 1]
