# Supplementary material
Source: publisher figshare collection journal article supplement (https://wiley.figshare.com/articles/dataset/_/6176210)

## Document information

|                                                       |                                                     |                   |
|-------------------------------------------------------|-----------------------------------------------------|-------------------|
| Software:                                             | realplex 2.2                                        |                   |
| File Name:                                            | Voytek\Runs\RT2PCRRArray ionic strength IS15 092513 |                   |
| Printed by:                                           | Voytek                                              |                   |
| Created:                                              | Sep/25/2013 09:07                                   |                   |
| Serial No. Thermo Module:                             | 6325 30342                                          |                   |
| Serial No. realplex Module.:                          | 630011432                                           |                   |
| Acquisition Start Time:                               | Voytek                                              | Sep/25/2013 10:30 |
| Acquisition End Time:                                 | Voytek                                              | Sep/25/2013 12:20 |
| Last updated:                                         | Voytek                                              | Mar/14/2012 13:10 |
| Background:                                           | SABioscience A Plate                                | Mar/14/2012 10:34 |
| Color Calibration:                                    | SYBR                                                | Jun/23/2011 09:04 |
| RT2PCRRArray ionic strength IS15 092513Quantification |                                                     | Sep/25/2013 13:15 |
| Inverted Data:                                        | OFF                                                 |                   |
| Comment:                                              |                                                     |                   |

## Plate layout

|   | 1    | 2    | 3    | 4    | 5    | 6    | 7    | 8    | 9    | 10   | 11   | 12   |
|---|------|------|------|------|------|------|------|------|------|------|------|------|
| A | IS15 |
| B | IS15 |
| C | IS15 |
| D | IS15 |
| E | IS15 |
| F | IS15 |
| G | IS15 |
| H | IS15 |

## PCR Program

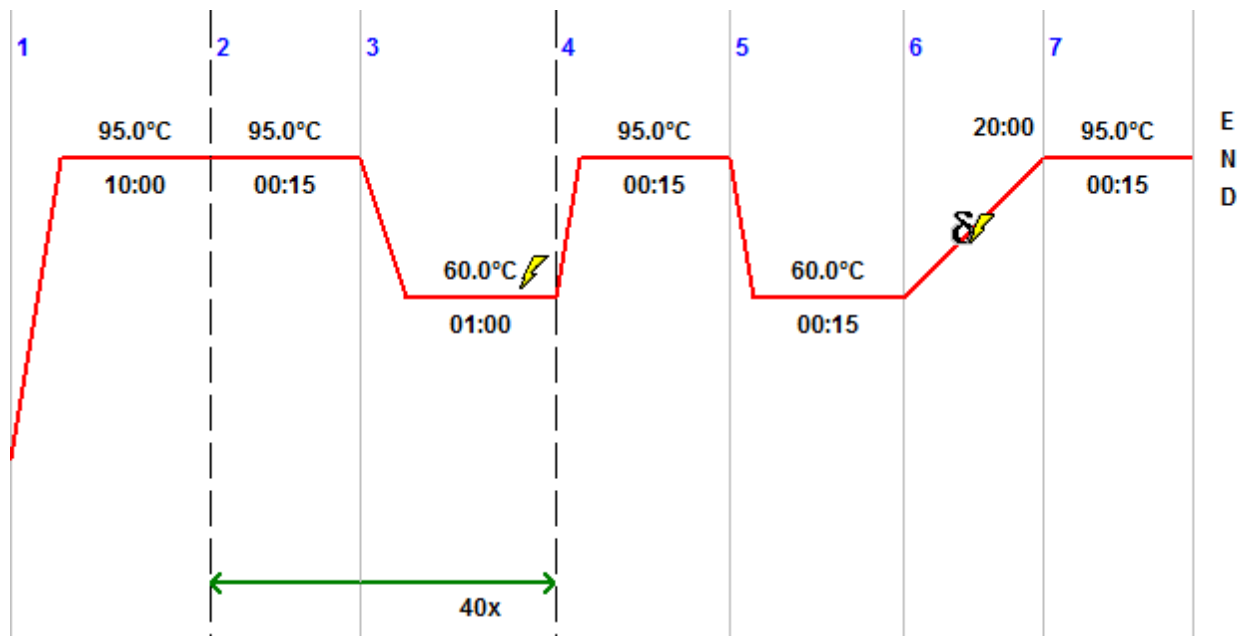

### Program Header

|            |          |                                  |     |
|------------|----------|----------------------------------|-----|
| Lid Temp   | 105 °C   | TSP Heated Lid                   | Yes |
| Temp. Mode | Standard | Switch off lid at low block temp | No  |
| Impulse    | No       | Simulate Mastercycler gradient   | No  |

### Program Details

Step 3 Ramp =26%

## Raw Data SYBR

### Fluorescence Profile

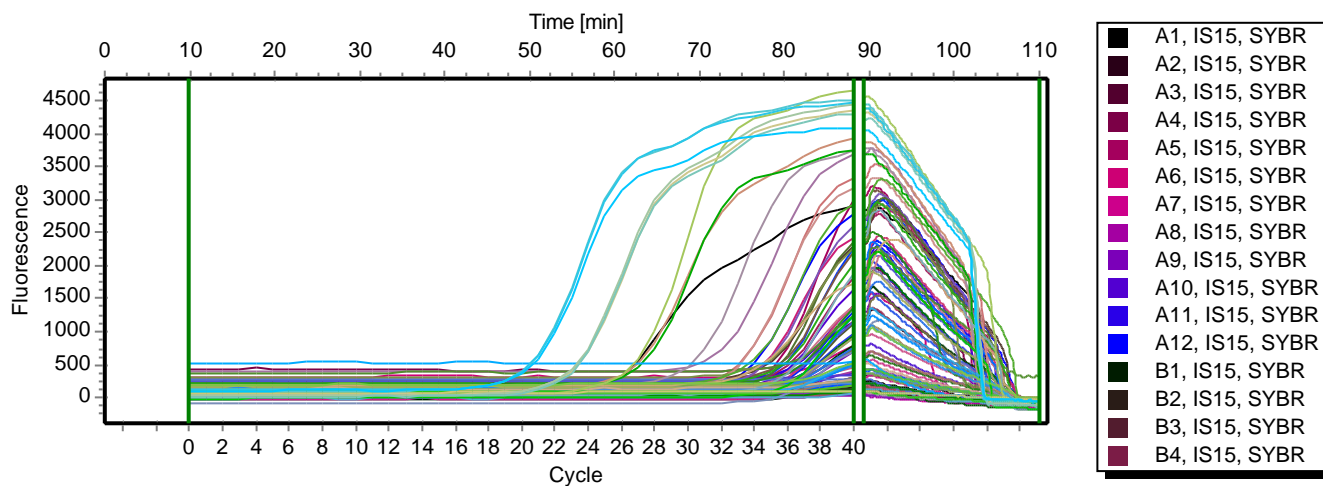

### Temperature Profile

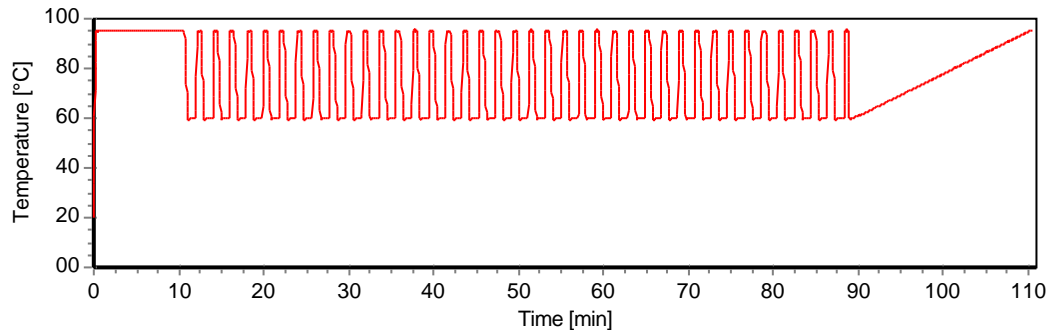

## Quantification SYBR

| Pos                                                                                    | Name | Ct SYBR | Amount SYBR | Target SYBR |
|----------------------------------------------------------------------------------------|------|---------|-------------|-------------|
|  A1    | IS15 | 23.95   | -           | unknown     |
|  A2    | IS15 | 35.73   | -           | unknown     |
|  A3    | IS15 |         | -           | unknown     |
|  A4    | IS15 | 35.33   | -           | unknown     |
|  A5    | IS15 | 33.00   | -           | unknown     |
|  A6    | IS15 | 35.90   | -           | unknown     |
|  A7    | IS15 |         | -           | unknown     |
|  A8    | IS15 |         | -           | unknown     |
|  A9    | IS15 | 35.46   | -           | unknown     |
|  A10   | IS15 | 33.97   | -           | unknown     |
|  A11   | IS15 | 34.79   | -           | unknown     |
|  A12   | IS15 | 31.32   | -           | unknown     |
|  B1    | IS15 | 38.87   | -           | unknown     |
|  B2    | IS15 | 38.73   | -           | unknown     |
|  B3  | IS15 |         | -           | unknown     |
|  B4  | IS15 |         | -           | unknown     |
|  B5  | IS15 | 34.28   | -           | unknown     |
|  B6  | IS15 | 31.90   | -           | unknown     |
|  B7  | IS15 | 38.30   | -           | unknown     |
|  B8  | IS15 |         | -           | unknown     |
|  B9  | IS15 |         | -           | unknown     |
|  B10 | IS15 | 36.92   | -           | unknown     |
|  B11 | IS15 |         | -           | unknown     |
|  B12 | IS15 | 34.71   | -           | unknown     |
|  C1  | IS15 | 35.39   | -           | unknown     |
|  C2  | IS15 |         | -           | unknown     |
|  C3  | IS15 | 33.16   | -           | unknown     |
|  C4  | IS15 |         | -           | unknown     |
|  C5  | IS15 | 35.72   | -           | unknown     |
|  C6  | IS15 | 34.60   | -           | unknown     |
|  C7  | IS15 | 37.57   | -           | unknown     |
|  C8  | IS15 | 36.41   | -           | unknown     |
|  C9  | IS15 |         | -           | unknown     |
|  C10 | IS15 |         | -           | unknown     |
|  C11 | IS15 | 35.15   | -           | unknown     |
|  C12 | IS15 | 33.89   | -           | unknown     |

| Pos                                                                                                                                                                        | Name | Ct SYBR | Amount SYBR | Target SYBR |
|----------------------------------------------------------------------------------------------------------------------------------------------------------------------------|------|---------|-------------|-------------|
|   D1      | IS15 |         | -           | unknown     |
|   D2      | IS15 |         | -           | unknown     |
|   D3      | IS15 | 34.85   | -           | unknown     |
|   D4      | IS15 | 33.83   | -           | unknown     |
|   D5      | IS15 |         | -           | unknown     |
|   D6      | IS15 |         | -           | unknown     |
|   D7      | IS15 | 36.40   | -           | unknown     |
|   D8      | IS15 | 38.46   | -           | unknown     |
|   D9      | IS15 | 32.40   | -           | unknown     |
|   D10     | IS15 | 35.01   | -           | unknown     |
|   D11     | IS15 | 35.54   | -           | unknown     |
|   D12     | IS15 | 37.93   | -           | unknown     |
|   E1      | IS15 | 35.01   | -           | unknown     |
|   E2      | IS15 | 37.03   | -           | unknown     |
|   E3      | IS15 | 33.05   | -           | unknown     |
|   E4      | IS15 | 35.46   | -           | unknown     |
|   E5      | IS15 | 36.73   | -           | unknown     |
|   E6  | IS15 | 31.10   | -           | unknown     |
|   E7  | IS15 | 33.95   | -           | unknown     |
|   E8  | IS15 | 30.33   | -           | unknown     |
|   E9  | IS15 | 35.23   | -           | unknown     |
|   E10 | IS15 |         | -           | unknown     |
|   E11 | IS15 | 35.35   | -           | unknown     |
|   E12 | IS15 | 34.91   | -           | unknown     |
|   F1  | IS15 |         | -           | unknown     |
|   F2  | IS15 | 34.96   | -           | unknown     |
|   F3  | IS15 | 35.00   | -           | unknown     |
|   F4  | IS15 | 33.35   | -           | unknown     |
|   F5  | IS15 | 36.11   | -           | unknown     |
|   F6  | IS15 | 25.00   | -           | unknown     |
|   F7  | IS15 | 30.65   | -           | unknown     |
|   F8  | IS15 | 28.59   | -           | unknown     |
|   F9  | IS15 | 34.81   | -           | unknown     |
|   F10 | IS15 | 39.00   | -           | unknown     |
|   F11 | IS15 | 36.07   | -           | unknown     |
|   F12 | IS15 | 35.76   | -           | unknown     |
|   G1  | IS15 | 25.35   | -           | unknown     |
|   G2  | IS15 | 34.00   | -           | unknown     |
|   G3  | IS15 | 31.72   | -           | unknown     |
|   G4  | IS15 |         | -           | unknown     |

| Pos                                                                                                                                                                        | Name | Ct SYBR | Amount SYBR | Target SYBR |
|----------------------------------------------------------------------------------------------------------------------------------------------------------------------------|------|---------|-------------|-------------|
|   G5      | IS15 | 35.38   | -           | unknown     |
|   G6      | IS15 | 32.30   | -           | unknown     |
|   G7      | IS15 | 38.10   | -           | unknown     |
|   G8      | IS15 |         | -           | unknown     |
|   G9      | IS15 | 34.23   | -           | unknown     |
|   G10     | IS15 |         | -           | unknown     |
|   G11     | IS15 | 35.80   | -           | unknown     |
|   G12     | IS15 |         | -           | unknown     |
|   H1      | IS15 | 34.66   | -           | unknown     |
|   H2      | IS15 |         | -           | unknown     |
|   H3      | IS15 | 37.93   | -           | unknown     |
|   H4      | IS15 | 36.40   | -           | unknown     |
|   H5      | IS15 | 24.61   | -           | unknown     |
|   H6      | IS15 |         | -           | unknown     |
|   H7      | IS15 | 21.16   | -           | unknown     |
|   H8      | IS15 | 21.05   | -           | unknown     |
|   H9      | IS15 | 21.18   | -           | unknown     |
|   H10 | IS15 | 18.50   | -           | unknown     |
|   H11 | IS15 | 18.68   | -           | unknown     |
|   H12 | IS15 | 18.69   | -           | unknown     |

## Amplification Plot

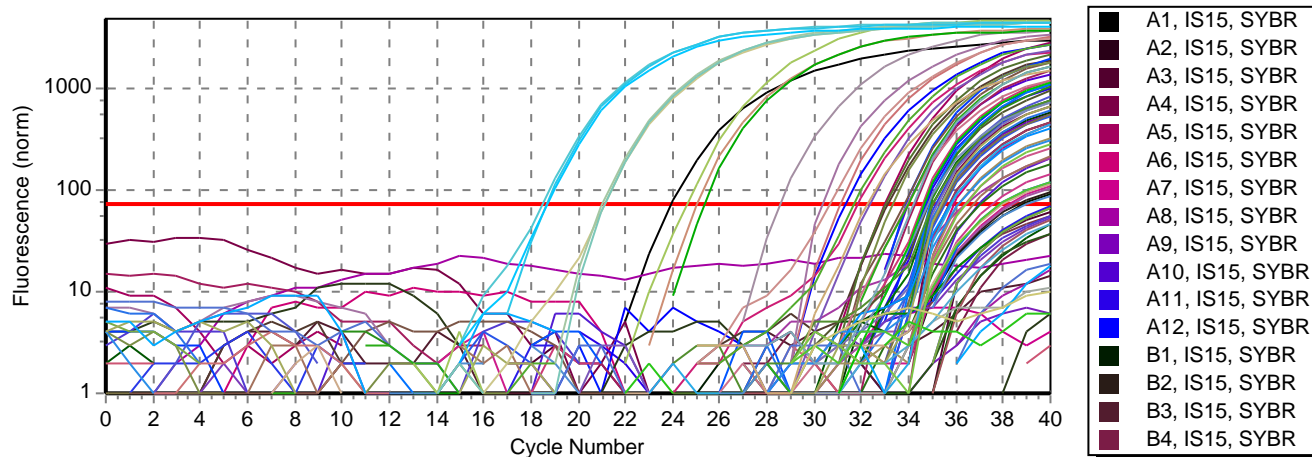

Supplement: Supplementary file 6 [file 1]
