# Supplementary material
Source: publisher figshare collection journal article supplement (https://wiley.figshare.com/articles/dataset/_/6176210)
Supplement: Supplementary file 1 [file 1]

Data Path : C:\msdchem\1\LEGACY\2012\February\  
Data File : 021312PA-.D  
Acq On : 13 Feb 2012 11:55  
Operator :  
Sample : PA-Day10  
Misc : 1.0 uL PA- at 1 mL  
ALS Vial : 13 Sample Multiplier: 1

Integration Parameters: rteint.p

Integrator: RTE

Smoothing : ON

Sampling : 1

Start Thrs: 0.2

Stop Thrs : 0

Filtering: 5

Min Area: 3 % of largest Peak

Max Peaks: 100

Peak Location: TOP

If leading or trailing edge < 100 prefer < Baseline drop else tangent >

Peak separation: 5

Method : C:\msdchem\1\METHODS\TLTICPAH.M

Title : PAH5437

Signal : TIC: 021312PA--Day10.D\data.ms

| peak<br># | R.T.<br>min | first<br>scan | max<br>scan | last<br>scan | PK<br>TY | peak<br>height | corr.<br>area | corr.<br>% max. | % of<br>total |
|-----------|-------------|---------------|-------------|--------------|----------|----------------|---------------|-----------------|---------------|
| 1         | 11.772      | 861           | 898         | 921          | rBV      | 25264922       | 147962514     | 100.00%         | 100.000%      |

Sum of corrected areas: 147962514

Data Path : C:\msdchem\1\LEGACY\2012\February\  
Data File : 021312PA-Day10.D  
Acq On : 13 Feb 2012 11:55  
Operator :  
Sample : PA--Day10  
Misc : 1.0 uL PA--Day10 at 1 mL  
ALS Vial : 13 Sample Multiplier: 1

Quant Method : C:\msdchem\1\METHODS\TLTICPAH.M  
Quant Title : PAH5437

TIC Library : C:\Database\NIST08.L  
TIC Integration Parameters: rteint.p

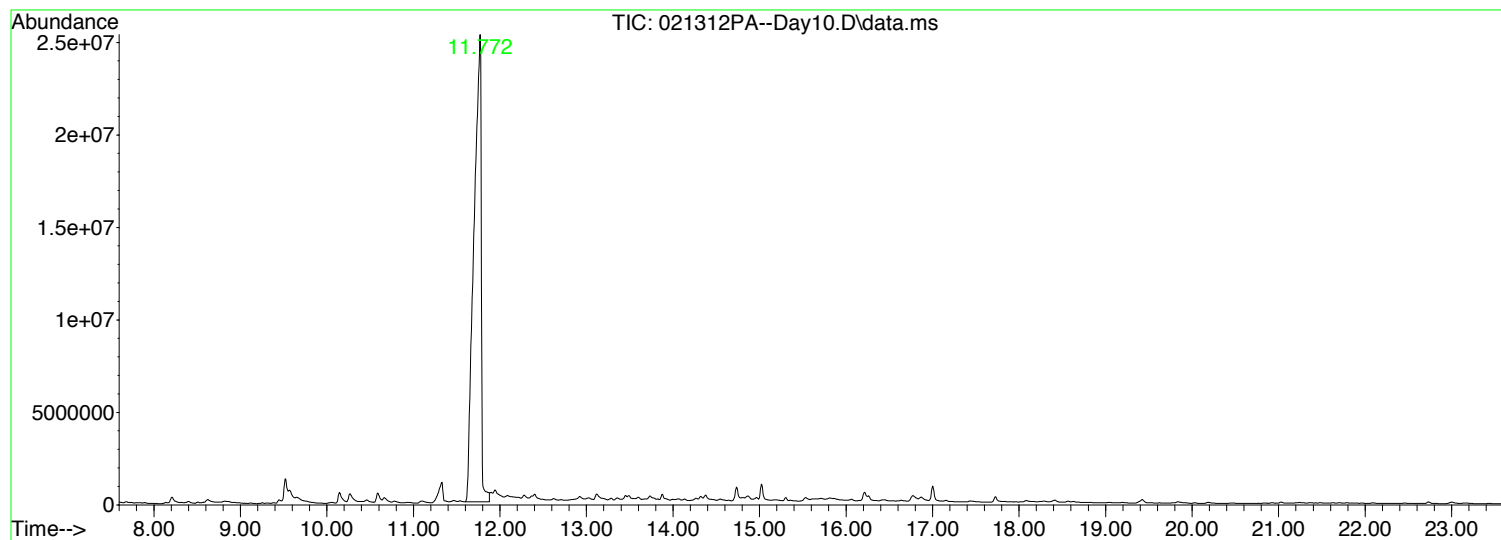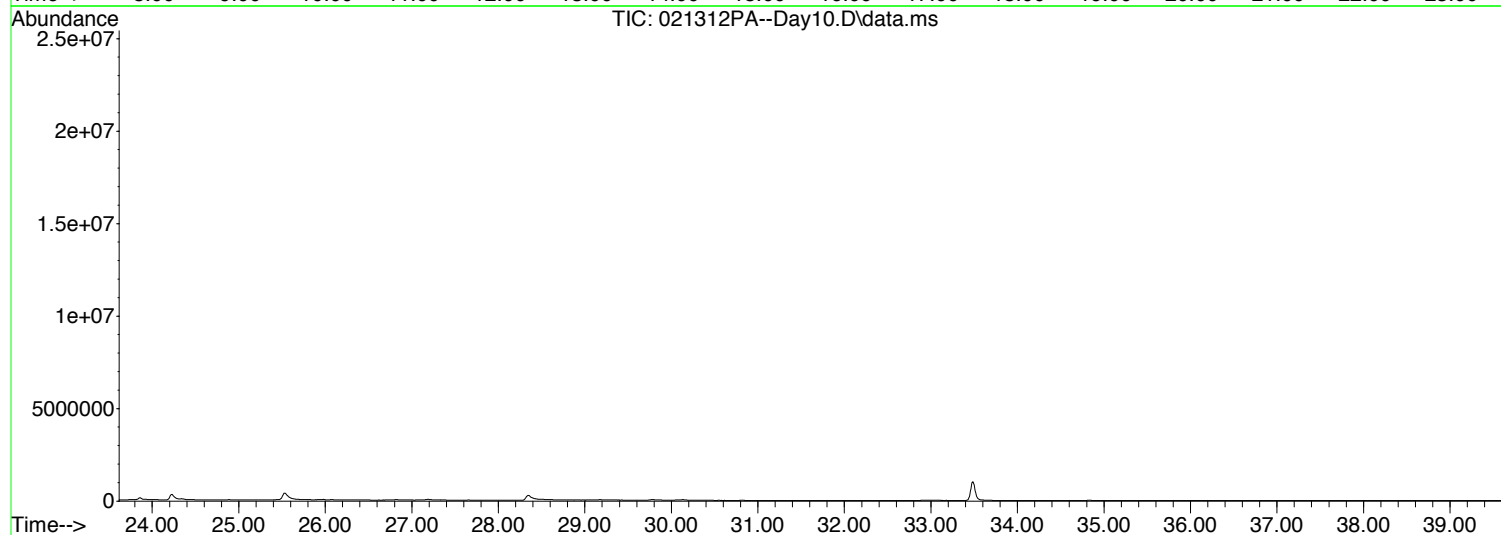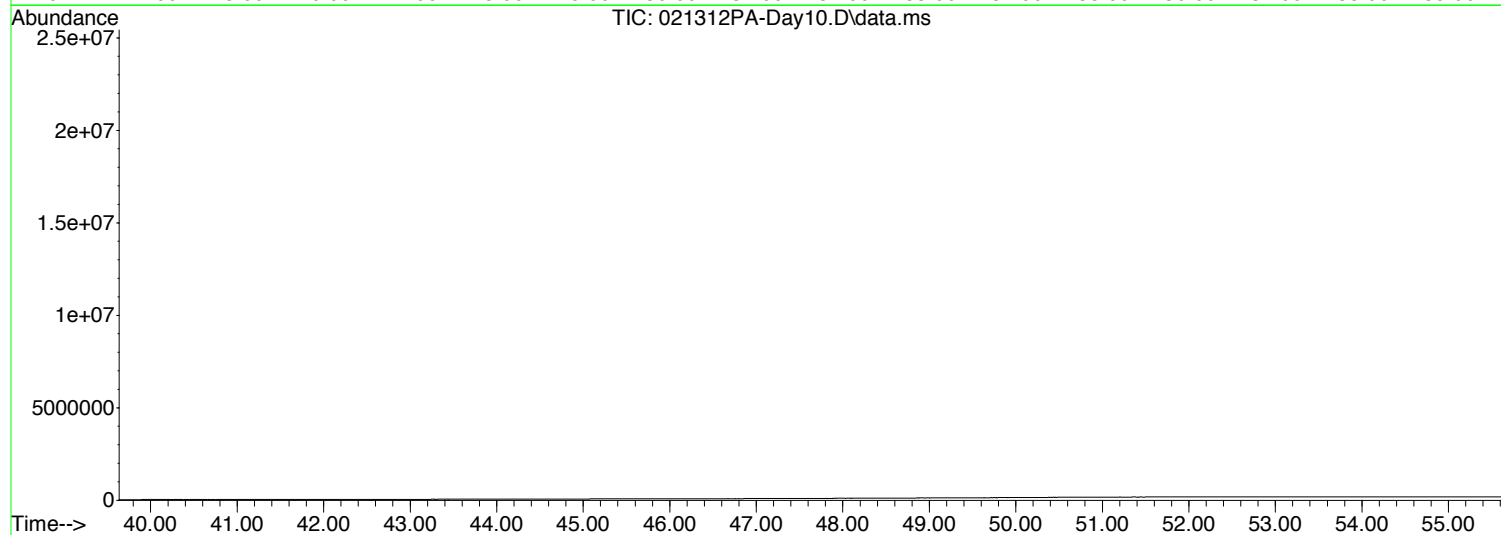

Data Path : C:\msdchem\1\LEGACY\2012\February\  
Data File : 021312PA--Day10.D  
Acq On : 13 Feb 2012 11:55  
Operator :  
Sample : PA-Day10  
Misc : 1.0 uL PA--Day10 at 1 mL  
ALS Vial : 13 Sample Multiplier: 1

Quant Method : C:\msdchem\1\METHODS\TLTICPAH.M  
Quant Title : PAH5437

TIC Library : C:\Database\NIST08.L  
TIC Integration Parameters: rteint.p

\*\*\*\*\*  
Peak Number 1 1,3-Pentanediol, 2,2,4-trimethyl- Concentration Rank 1

| R.T.   | EstConc     | Area      | Relative to ISTD  | R.T.  |
|--------|-------------|-----------|-------------------|-------|
| 11.772 | 14796.30 ng | 147963000 | External Standard | 0.000 |

| Hit# | of | 5 | Tentative ID                      | MW  | MolForm | CAS#        | Qual |
|------|----|---|-----------------------------------|-----|---------|-------------|------|
| 1    |    |   | 1,3-Pentanediol, 2,2,4-trimethyl- | 146 | C8H18O2 | 000144-19-4 | 90   |
| 2    |    |   | 1,3-Pentanediol, 2,2,4-trimethyl- | 146 | C8H18O2 | 000144-19-4 | 72   |
| 3    |    |   | 1,3-Pentanediol, 2,2,4-trimethyl- | 146 | C8H18O2 | 000144-19-4 | 72   |
| 4    |    |   | 1-Hexene, 5-methyl-               | 98  | C7H14   | 003524-73-0 | 25   |
| 5    |    |   | Decane, 5-methyl-6-methylene-     | 168 | C12H24  | 075029-95-7 | 17   |

Abundance Scan 898 (11.772 min): 021312PA-Day10.D\data.ms (-861) (-)

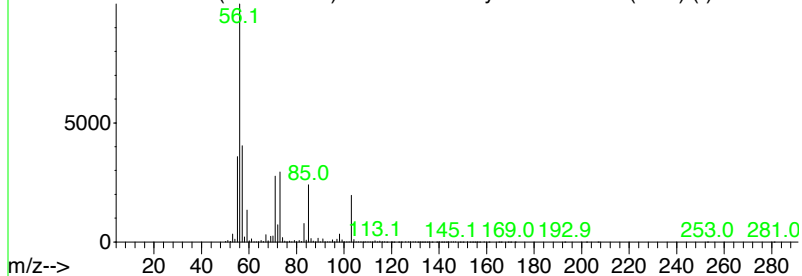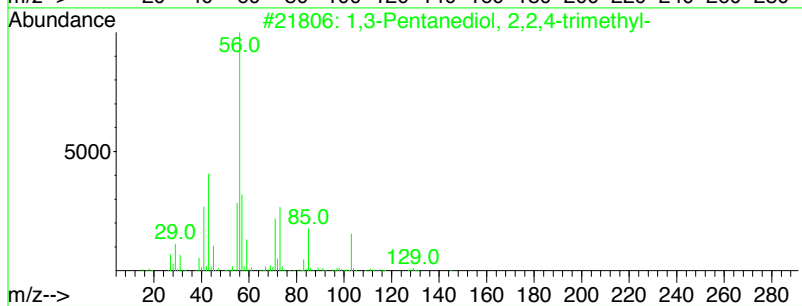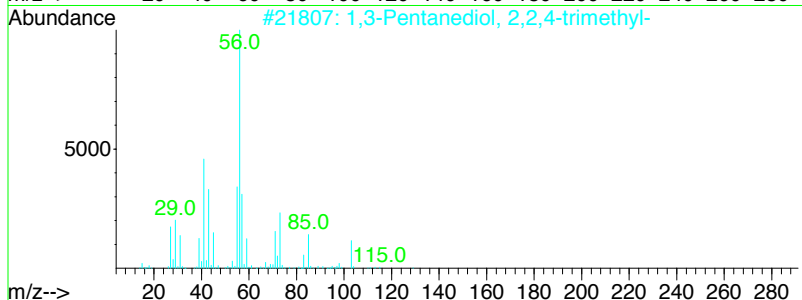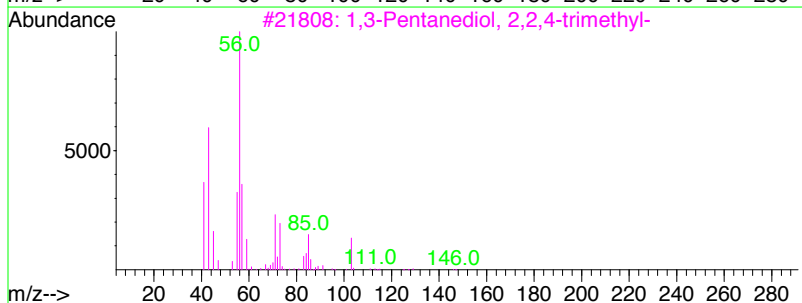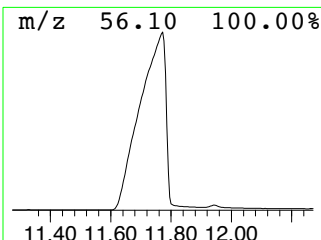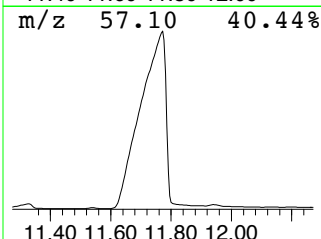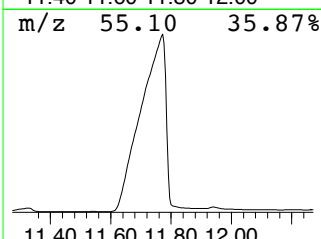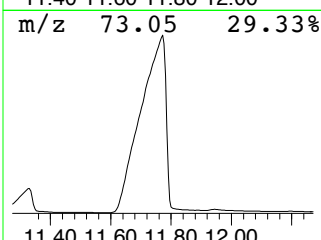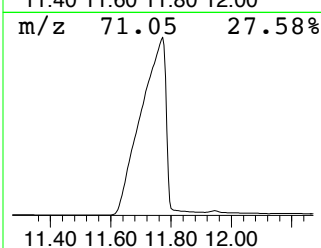

Data Path : C:\msdchem\1\LEGACY\2012\February\  
Data File : 02131-Day10.D  
Acq On : 13 Feb 2012 11:55  
Operator :  
Sample : PA-Day10  
Misc : 1.0 uL PA--Day10 at 1 mL  
ALS Vial : 13 Sample Multiplier: 1

Quant Method : C:\msdchem\1\METHODS\TLTICPAH.M  
Quant Title : PAH5437

TIC Library : C:\Database\NIST08.L  
TIC Integration Parameters: rteint.p

| TIC Top Hit name   | RT     | EstConc | Units | Response  | --Internal Standard-- |       |       |      |
|--------------------|--------|---------|-------|-----------|-----------------------|-------|-------|------|
|                    |        |         |       |           | #                     | RT    | Resp  | Conc |
| 1,3-Pentanediol... | 11.772 | 14796.3 | ng    | 147963000 | 0                     | 0.000 | 10000 | 1.0  |
