# Supplementary material
Source: publisher figshare collection journal article supplement (https://wiley.figshare.com/articles/dataset/_/6176210)
Supplement: Supplementary file 3 [file 1]

## Document information

|                                                      |                                                     |                   |
|------------------------------------------------------|-----------------------------------------------------|-------------------|
| Software:                                            | realplex 2.2                                        |                   |
| File Name:                                           | Voytek\Runs\RT2PCRRArray ionic strength IS13 092413 |                   |
| Printed by:                                          | Voytek                                              |                   |
| Created:                                             | Sep/24/2013 10:06                                   |                   |
| Serial No. Thermo Module:                            | 6325 30342                                          |                   |
| Serial No. realplex Module.:                         | 630011432                                           |                   |
| Acquisition Start Time:                              | Voytek                                              | Sep/24/2013 11:17 |
| Acquisition End Time:                                | Voytek                                              | Sep/24/2013 13:07 |
| Last updated:                                        | Voytek                                              | Mar/14/2012 13:10 |
| Background:                                          | SABioscience A Plate                                | Mar/14/2012 10:34 |
| Color Calibration:                                   | SYBR                                                | Jun/23/2011 09:04 |
| RT2PCRRArray ionic strength IS13 09241Quantification |                                                     | Sep/24/2013 13:30 |
| Inverted Data:                                       | OFF                                                 |                   |
| Comment:                                             |                                                     |                   |

## Plate layout

|   | 1    | 2    | 3    | 4    | 5    | 6    | 7    | 8    | 9    | 10   | 11   | 12   |
|---|------|------|------|------|------|------|------|------|------|------|------|------|
| A | IS13 |
| B | IS13 |
| C | IS13 |
| D | IS13 |
| E | IS13 |
| F | IS13 |
| G | IS13 |
| H | IS13 |

## PCR Program

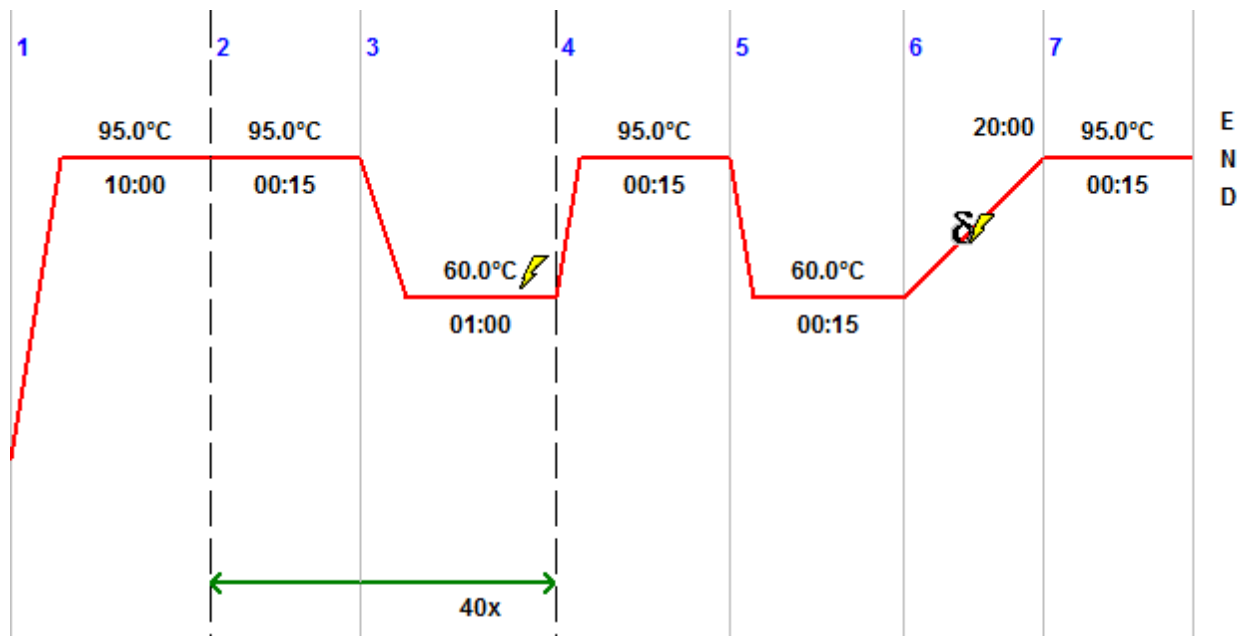

### Program Header

|            |          |                                  |     |
|------------|----------|----------------------------------|-----|
| Lid Temp   | 105 °C   | TSP Heated Lid                   | Yes |
| Temp. Mode | Standard | Switch off lid at low block temp | No  |
| Impulse    | No       | Simulate Mastercycler gradient   | No  |

### Program Details

Step 3 Ramp =26%

## Raw Data SYBR

### Fluorescence Profile

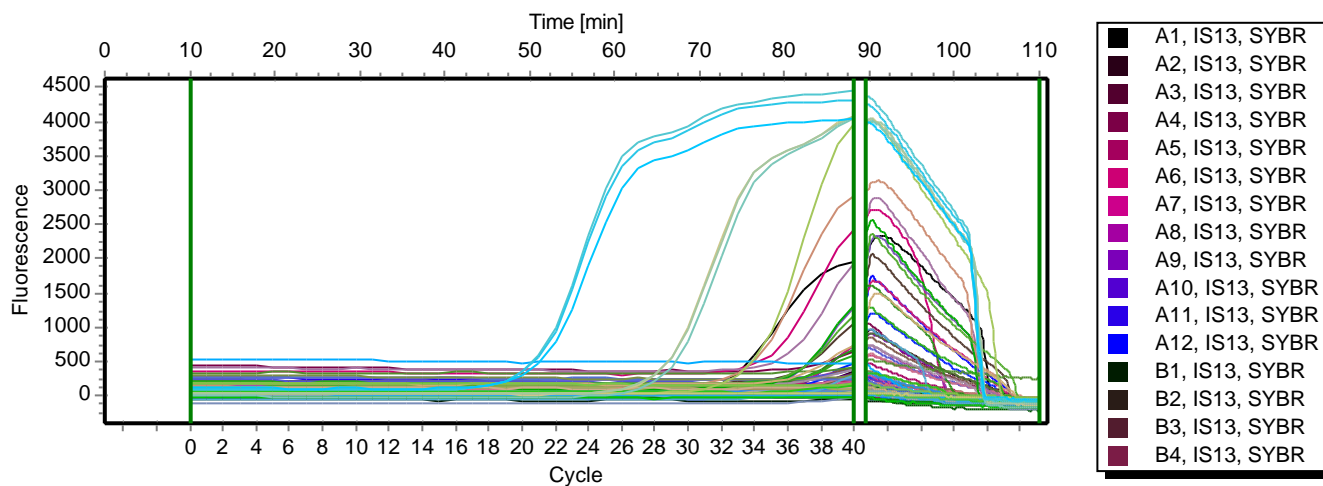

### Temperature Profile

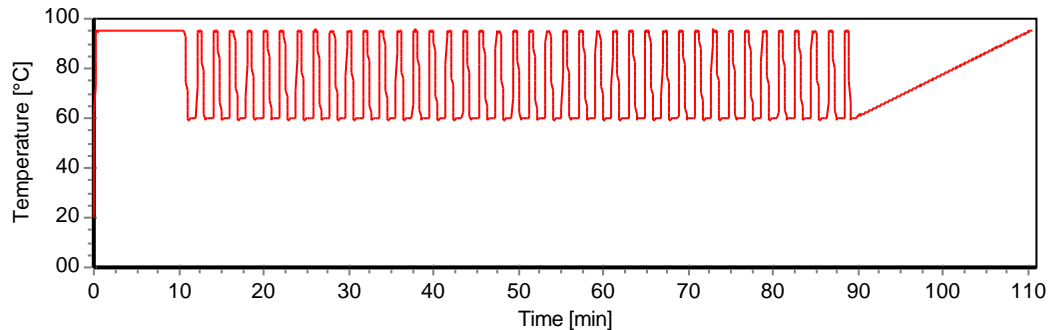

## Quantification SYBR

| Pos                                                                                    | Name | Ct SYBR | Amount SYBR | Target SYBR |
|----------------------------------------------------------------------------------------|------|---------|-------------|-------------|
|  A1    | IS13 | 30.64   | -           | unknown     |
|  A2    | IS13 | 35.87   | -           | unknown     |
|  A3    | IS13 |         | -           | unknown     |
|  A4    | IS13 | 36.76   | -           | unknown     |
|  A5    | IS13 | 37.74   | -           | unknown     |
|  A6    | IS13 | 33.45   | -           | unknown     |
|  A7    | IS13 |         | -           | unknown     |
|  A8    | IS13 |         | -           | unknown     |
|  A9    | IS13 | 36.55   | -           | unknown     |
|  A10   | IS13 |         | -           | unknown     |
|  A11   | IS13 |         | -           | unknown     |
|  A12   | IS13 | 35.12   | -           | unknown     |
|  B1  | IS13 |         | -           | unknown     |
|  B2  | IS13 |         | -           | unknown     |
|  B3  | IS13 |         | -           | unknown     |
|  B4  | IS13 |         | -           | unknown     |
|  B5  | IS13 |         | -           | unknown     |
|  B6  | IS13 | 35.28   | -           | unknown     |
|  B7  | IS13 | 39.71   | -           | unknown     |
|  B8  | IS13 |         | -           | unknown     |
|  B9  | IS13 |         | -           | unknown     |
|  B10 | IS13 |         | -           | unknown     |
|  B11 | IS13 |         | -           | unknown     |
|  B12 | IS13 | 35.82   | -           | unknown     |
|  C1  | IS13 |         | -           | unknown     |
|  C2  | IS13 |         | -           | unknown     |
|  C3  | IS13 | 35.14   | -           | unknown     |
|  C4  | IS13 |         | -           | unknown     |
|  C5  | IS13 |         | -           | unknown     |
|  C6  | IS13 | 37.40   | -           | unknown     |
|  C7  | IS13 |         | -           | unknown     |
|  C8  | IS13 | 36.14   | -           | unknown     |
|  C9  | IS13 |         | -           | unknown     |
|  C10 | IS13 |         | -           | unknown     |
|  C11 | IS13 |         | -           | unknown     |
|  C12 | IS13 |         | -           | unknown     |

| Pos | Name | Ct SYBR | Amount SYBR | Target SYBR |
|-----|------|---------|-------------|-------------|
| D1  | IS13 |         | -           | unknown     |
| D2  | IS13 |         | -           | unknown     |
| D3  | IS13 |         | -           | unknown     |
| D4  | IS13 | 36.62   | -           | unknown     |
| D5  | IS13 |         | -           | unknown     |
| D6  | IS13 |         | -           | unknown     |
| D7  | IS13 |         | -           | unknown     |
| D8  | IS13 |         | -           | unknown     |
| D9  | IS13 | 34.89   | -           | unknown     |
| D10 | IS13 | 37.12   | -           | unknown     |
| D11 | IS13 |         | -           | unknown     |
| D12 | IS13 |         | -           | unknown     |
| E1  | IS13 |         | -           | unknown     |
| E2  | IS13 |         | -           | unknown     |
| E3  | IS13 | 36.21   | -           | unknown     |
| E4  | IS13 | 39.21   | -           | unknown     |
| E5  | IS13 |         | -           | unknown     |
| E6  | IS13 |         | -           | unknown     |
| E7  | IS13 | 37.04   | -           | unknown     |
| E8  | IS13 | 34.64   | -           | unknown     |
| E9  | IS13 |         | -           | unknown     |
| E10 | IS13 |         | -           | unknown     |
| E11 | IS13 |         | -           | unknown     |
| E12 | IS13 |         | -           | unknown     |
| F1  | IS13 |         | -           | unknown     |
| F2  | IS13 | 35.88   | -           | unknown     |
| F3  | IS13 | 39.94   | -           | unknown     |
| F4  | IS13 |         | -           | unknown     |
| F5  | IS13 |         | -           | unknown     |
| F6  | IS13 | 31.82   | -           | unknown     |
| F7  | IS13 |         | -           | unknown     |
| F8  | IS13 | 36.94   | -           | unknown     |
| F9  | IS13 |         | -           | unknown     |
| F10 | IS13 |         | -           | unknown     |
| F11 | IS13 |         | -           | unknown     |
| F12 | IS13 |         | -           | unknown     |
| G1  | IS13 | 34.87   | -           | unknown     |
| G2  | IS13 | 35.88   | -           | unknown     |
| G3  | IS13 | 34.92   | -           | unknown     |
| G4  | IS13 |         | -           | unknown     |

| Pos                                                                                                                                                                        | Name | Ct SYBR | Amount SYBR | Target SYBR |
|----------------------------------------------------------------------------------------------------------------------------------------------------------------------------|------|---------|-------------|-------------|
|   G5      | IS13 |         | -           | unknown     |
|   G6      | IS13 | 35.43   | -           | unknown     |
|   G7      | IS13 |         | -           | unknown     |
|   G8      | IS13 |         | -           | unknown     |
|   G9      | IS13 |         | -           | unknown     |
|   G10     | IS13 | 36.19   | -           | unknown     |
|   G11     | IS13 |         | -           | unknown     |
|   G12     | IS13 |         | -           | unknown     |
|   H1      | IS13 |         | -           | unknown     |
|   H2      | IS13 | 38.91   | -           | unknown     |
|   H3      | IS13 |         | -           | unknown     |
|   H4      | IS13 |         | -           | unknown     |
|   H5      | IS13 | 31.63   | -           | unknown     |
|   H6      | IS13 |         | -           | unknown     |
|   H7      | IS13 | 26.56   | -           | unknown     |
|   H8      | IS13 | 26.59   | -           | unknown     |
|   H9      | IS13 | 26.80   | -           | unknown     |
|   H10 | IS13 | 18.67   | -           | unknown     |
|   H11 | IS13 | 18.73   | -           | unknown     |
|   H12 | IS13 | 19.00   | -           | unknown     |

## Amplification Plot

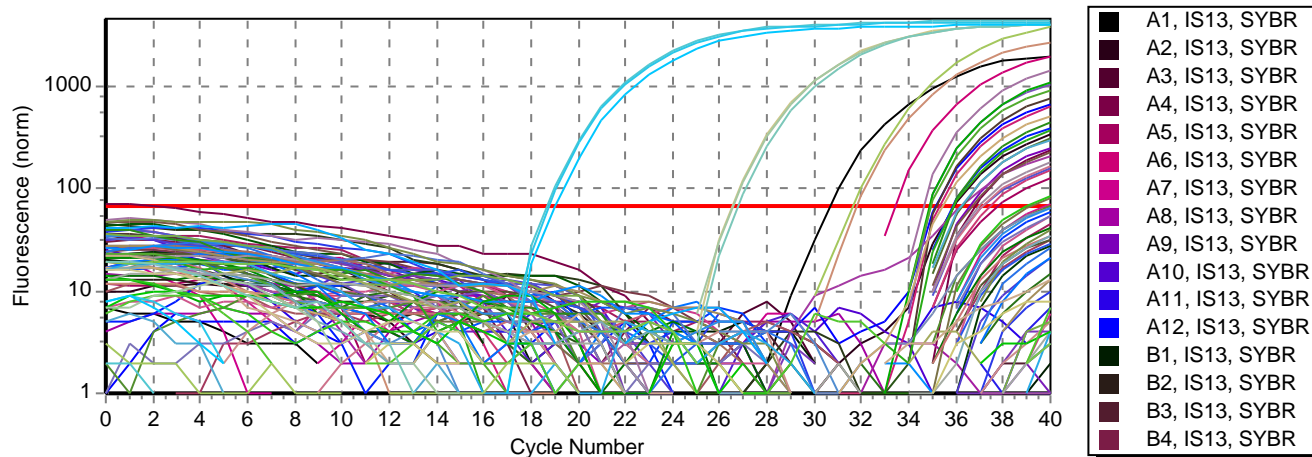

Threshold 66 (Noiseband)

Baseline automatic, Drift correction OFF
