# Supplementary material
Source: publisher figshare collection journal article supplement (https://wiley.figshare.com/articles/dataset/_/6176210)
Supplement: Supplementary file 4 [file 1]

Data Path : C:\msdchem\1\LEGACY\2012\February\  
Data File : 022412PA--012512-dilute.D  
Acq On : 24 Feb 2012 14:49  
Operator :  
Sample : PA--012512-dilute  
Misc : 1.0 uL PA--012512 at 1 mL dilute 1/10  
ALS Vial : 43 Sample Multiplier: 1

Integration Parameters: rteint.p

Integrator: RTE

Smoothing : ON

Sampling : 1

Start Thrs: 0.2

Stop Thrs : 0

Filtering: 5

Min Area: 3 % of largest Peak

Max Peaks: 100

Peak Location: TOP

If leading or trailing edge < 100 prefer < Baseline drop else tangent >

Peak separation: 5

Method : C:\msdchem\1\METHODS\TLTICPAH.M

Title : PAH5437

Signal : TIC: 022412PA--012512-dilute.D\data.ms

| peak<br># | R.T.<br>min | first<br>scan | max<br>scan | last<br>scan | PK<br>TY | peak<br>height | corr.<br>area | corr.<br>% max. | % of<br>total |
|-----------|-------------|---------------|-------------|--------------|----------|----------------|---------------|-----------------|---------------|
| 1         | 11.651      | 858           | 872         | 912          | rBV      | 3921056        | 10877172      | 100.00%         | 100.000%      |

Sum of corrected areas: 10877172

Data Path : C:\msdchem\1\LEGACY\2012\February\  
Data File : 022412PA-012512-dilute.D  
Acq On : 24 Feb 2012 14:49  
Operator :  
Sample : PA-012512-dilute  
Misc : 1.0 uL PA--012512 at 1 mL dilute 1/10  
ALS Vial : 43 Sample Multiplier: 1

Quant Method : C:\msdchem\1\METHODS\TLTICPAH.M  
Quant Title : PAH5437

TIC Library : C:\Database\NIST08.L  
TIC Integration Parameters: rteint.p

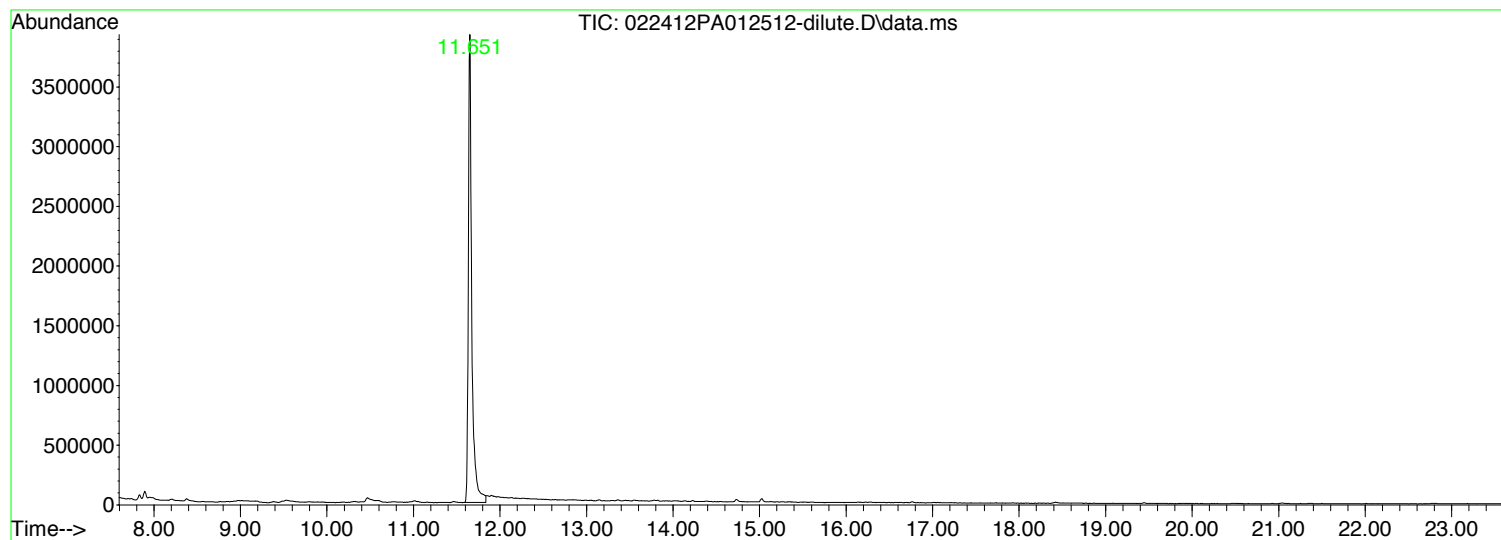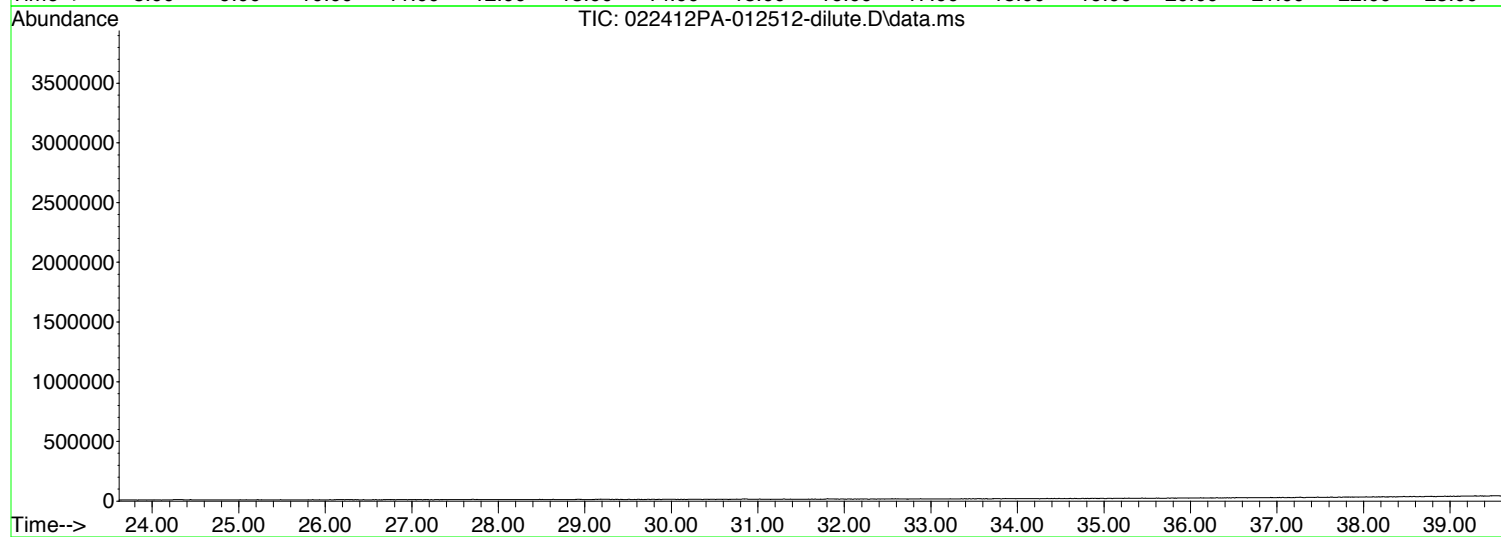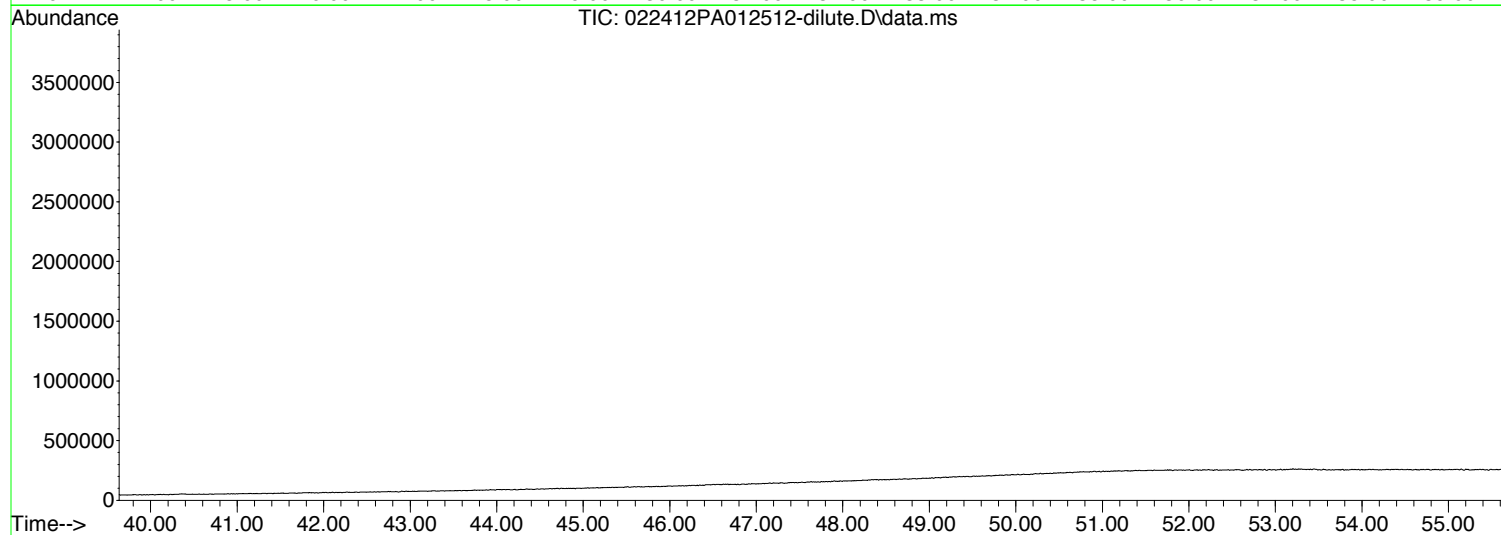

Data Path : C:\msdchem\1\LEGACY\2012\February\  
Data File : 022412PA-012512-dilute.D  
Acq On : 24 Feb 2012 14:49  
Operator :  
Sample : PA-012512-dilute  
Misc : 1.0 uL PA--012512 at 1 mL dilute 1/10  
ALS Vial : 43 Sample Multiplier: 1

Quant Method : C:\msdchem\1\METHODS\TLTICPAH.M  
Quant Title : PAH5437

TIC Library : C:\Database\NIST08.L  
TIC Integration Parameters: rteint.p

\*\*\*\*\*  
Peak Number 1 1,3-Pentanediol, 2,2,4-trimethyl- Concentration Rank 1

| R.T.   | EstConc    | Area     | Relative to ISTD  | R.T.  |
|--------|------------|----------|-------------------|-------|
| 11.651 | 1087.72 ng | 10877200 | External Standard | 0.000 |

| Hit# | of | 5 | Tentative ID                      | MW  | MolForm | CAS#        | Qual |
|------|----|---|-----------------------------------|-----|---------|-------------|------|
| 1    |    |   | 1,3-Pentanediol, 2,2,4-trimethyl- | 146 | C8H18O2 | 000144-19-4 | 90   |
| 2    |    |   | 1,3-Pentanediol, 2,2,4-trimethyl- | 146 | C8H18O2 | 000144-19-4 | 78   |
| 3    |    |   | 1,3-Pentanediol, 2,2,4-trimethyl- | 146 | C8H18O2 | 000144-19-4 | 56   |
| 4    |    |   | 1-Hexene, 2,5-dimethyl-           | 112 | C8H16   | 006975-92-4 | 17   |
| 5    |    |   | 1-Hexene, 5-methyl-               | 98  | C7H14   | 003524-73-0 | 9    |

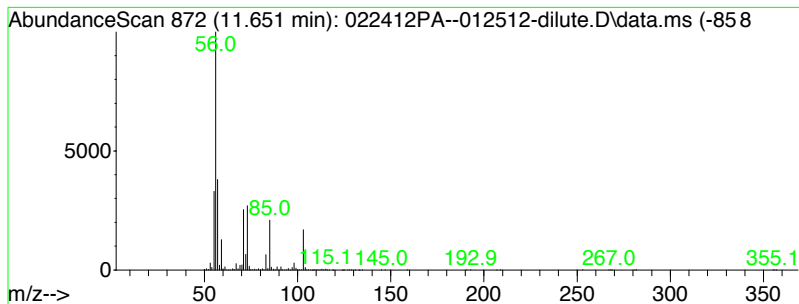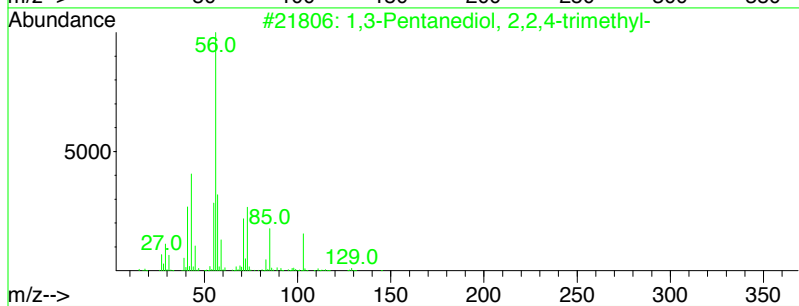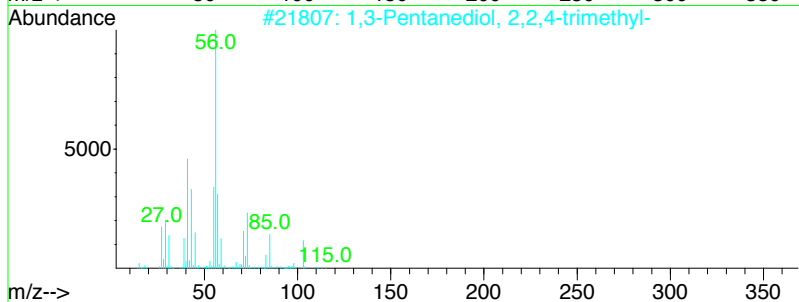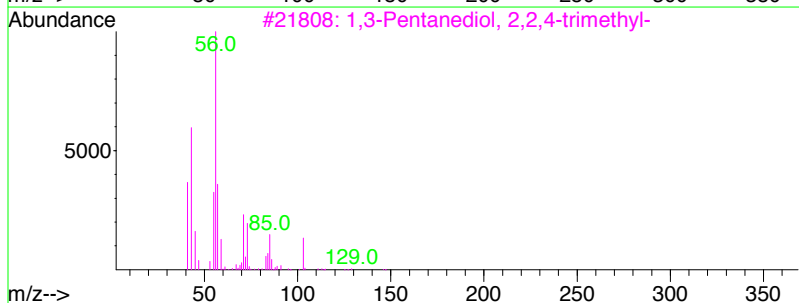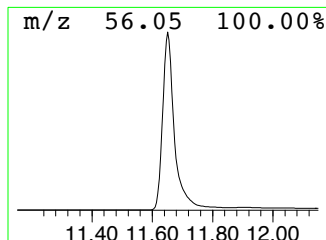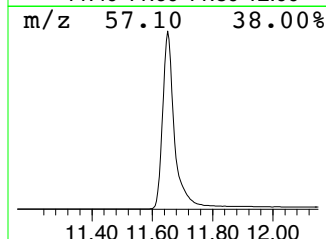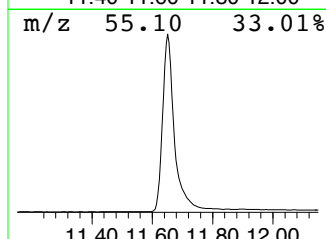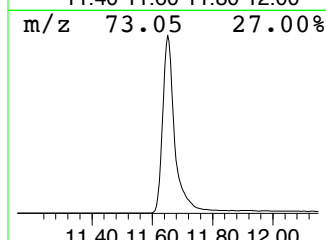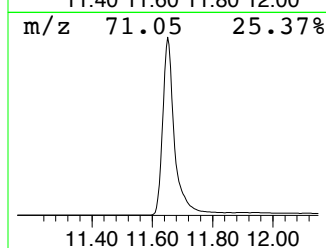

Data Path : C:\msdchem\1\LEGACY\2012\February\  
Data File : 022412-012512-dilute.D  
Acq On : 24 Feb 2012 14:49  
Operator :  
Sample : PA--012512-dilute  
Misc : 1.0 uL PA--012512 at 1 mL dilute 1/10  
ALS Vial : 43 Sample Multiplier: 1

Quant Method : C:\msdchem\1\METHODS\TLTICPAH.M  
Quant Title : PAH5437

TIC Library : C:\Database\NIST08.L  
TIC Integration Parameters: rteint.p

| TIC Top Hit name   | RT     | EstConc | Units | Response | --Internal Standard-- |       |       |      |
|--------------------|--------|---------|-------|----------|-----------------------|-------|-------|------|
|                    |        |         |       |          | #                     | RT    | Resp  | Conc |
| 1,3-Pentenediol... | 11.651 | 1087.7  | ng    | 10877200 | 0                     | 0.000 | 10000 | 1.0  |
