# Supplementary material
Source: publisher figshare collection journal article supplement (https://wiley.figshare.com/articles/dataset/_/6176210)
Supplement: Supplementary file 5 [file 1]

Data Path : C:\msdchem\1\LEGACY\2012\January\  
Data File : 011112PA- 8-Day4.D  
Acq On : 11 Jan 2012 14:47  
Operator :  
Sample : PA-Blaker8-Day4  
Misc : 1.0 uL PA- 8-Day4 at 1 mL dilute 1/10  
ALS Vial : 60 Sample Multiplier: 1

Integration Parameters: rteint.p  
Integrator: RTE  
Smoothing : ON Filtering: 5  
Sampling : 1 Min Area: 3 % of largest Peak  
Start Thrs: 0.2 Max Peaks: 100  
Stop Thrs : 0 Peak Location: TOP

If leading or trailing edge < 100 prefer < Baseline drop else tangent >  
Peak separation: 5

Method : C:\msdchem\1\METHODS\TLTICPAH.M  
Title : PAH5437

Signal : TIC: 011112PA- 8-Day4.D\data.ms

| peak<br># | R.T.<br>min | first<br>scan | max<br>scan | last<br>scan | PK<br>TY | peak<br>height | corr.<br>area | corr.<br>% max. | % of<br>total |
|-----------|-------------|---------------|-------------|--------------|----------|----------------|---------------|-----------------|---------------|
| 1         | 13.876      | 1343          | 1350        | 1360         | rBV      | 324642         | 628225        | 3.71%           | 3.456%        |
| 2         | 15.305      | 1649          | 1657        | 1665         | rBV      | 314046         | 606069        | 3.58%           | 3.334%        |
| 3         | 33.498      | 5544          | 5565        | 5625         | rBV      | 4559061        | 16942097      | 100.00%         | 93.209%       |

Sum of corrected areas: 18176391

Data Path : C:\msdchem\1\LEGACY\2012\January\  
Data File : 011112PA- [REDACTED] 8-Day4.D  
Acq On : 11 Jan 2012 14:47  
Operator :  
Sample : PA-Blaker8-Day4  
Misc : 1.0 uL PA- [REDACTED] 8-Day4 at 1 mL dilute 1/10  
ALS Vial : 60 Sample Multiplier: 1

Quant Method : C:\msdchem\1\METHODS\TLTICPAH.M  
Quant Title : PAH5437

TIC Library : C:\Database\NIST08.L  
TIC Integration Parameters: rteint.p

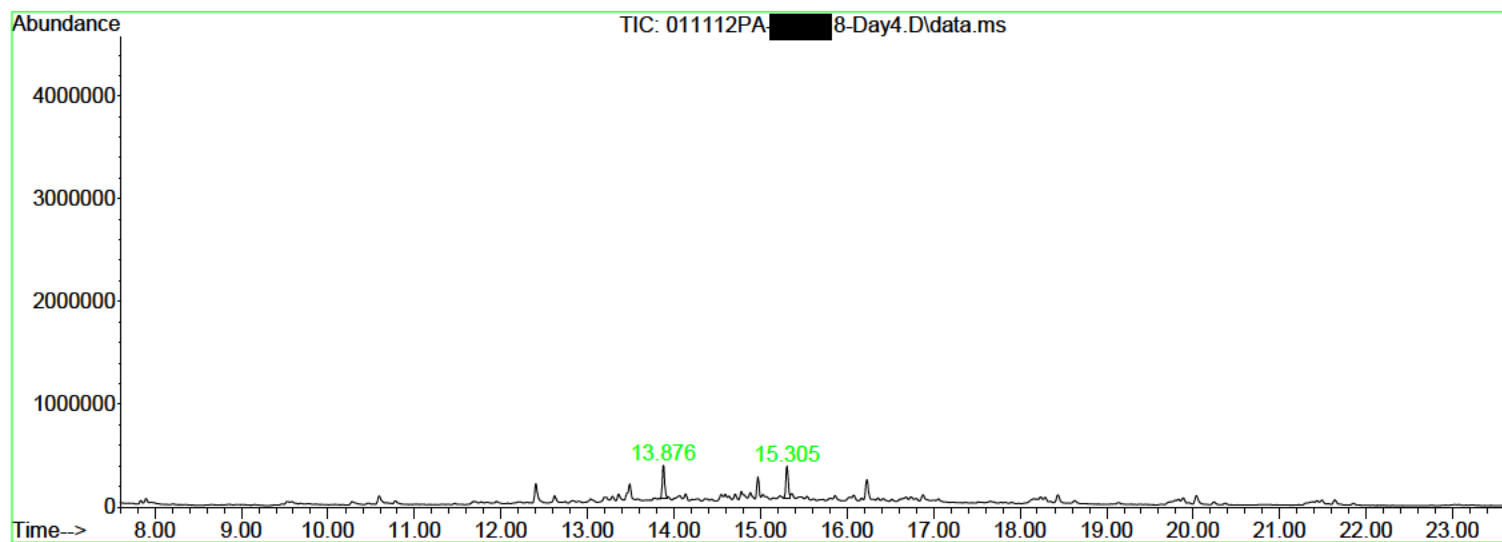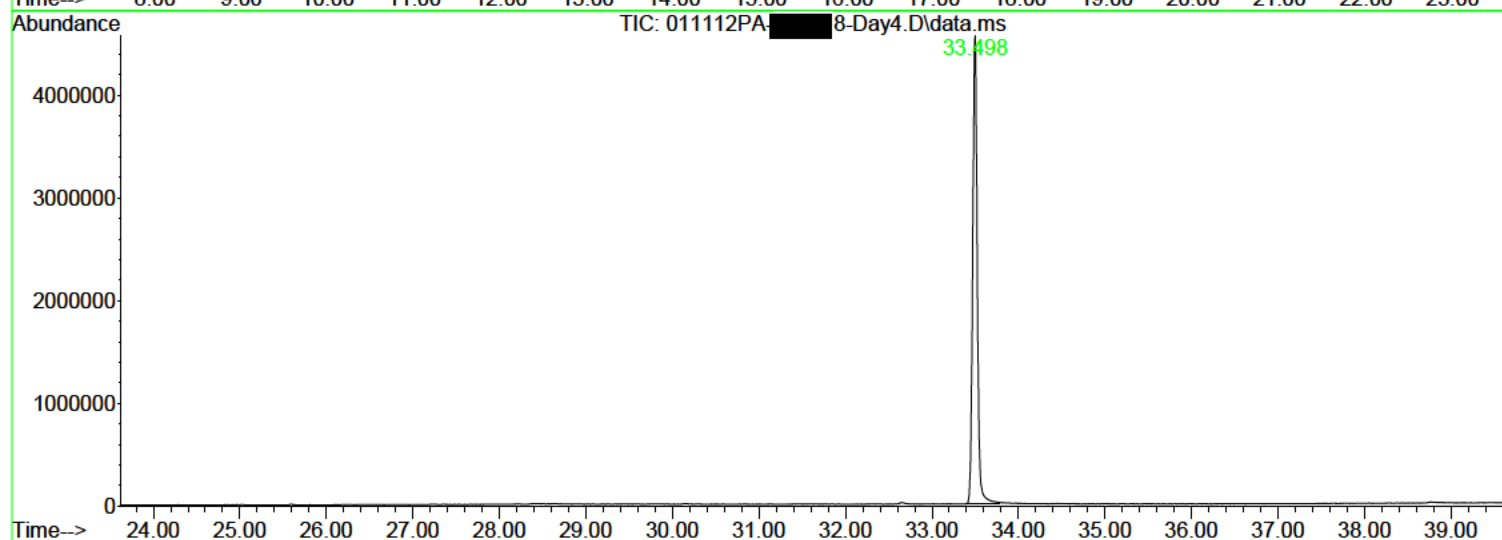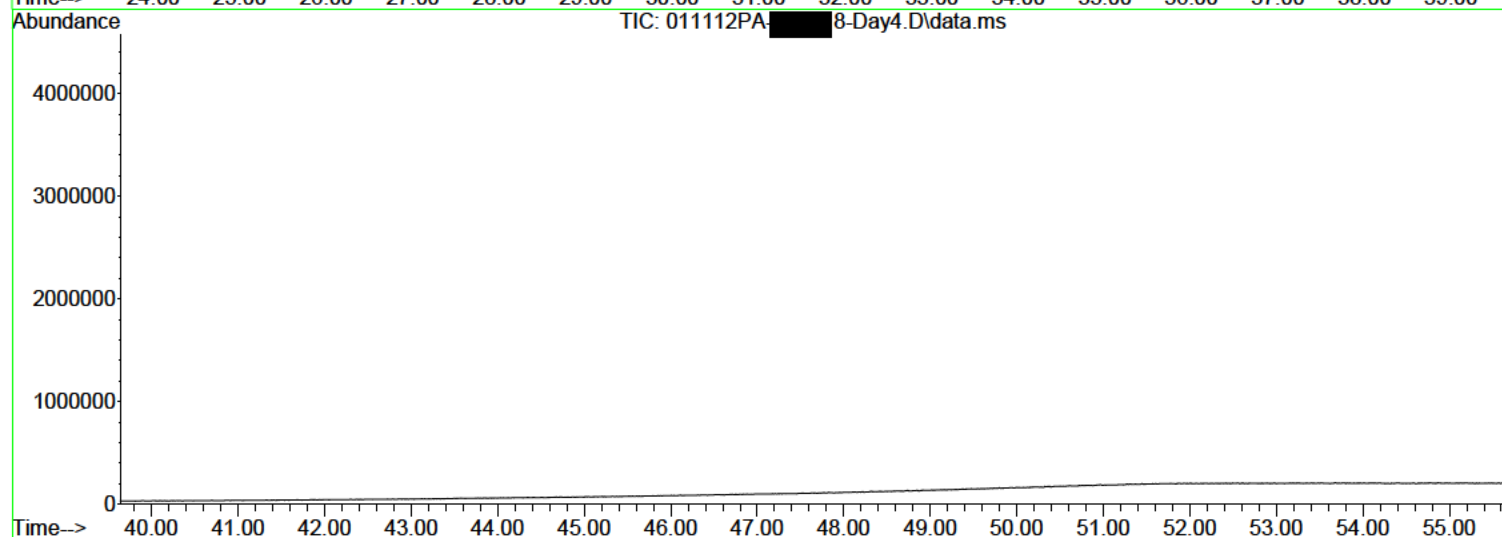

Data Path : C:\msdchem\1\LEGACY\2012\January\  
Data File : 011112PA- 8-Day4.D  
Acq On : 11 Jan 2012 14:47  
Operator :  
Sample : PA-Blaker8-Day4  
Misc : 1.0 uL PA- 8-Day4 at 1 mL dilute 1/10  
ALS Vial : 60 Sample Multiplier: 1

Quant Method : C:\msdchem\1\METHODS\TLTICPAH.M  
Quant Title : PAH5437

TIC Library : C:\Database\NIST08.L  
TIC Integration Parameters: rteint.p

\*\*\*\*\*  
Peak Number 1 Tridecane Concentration Rank 2

| R.T.   | EstConc  | Area   | Relative to ISTD  | R.T.  |
|--------|----------|--------|-------------------|-------|
| 13.876 | 62.82 ng | 628225 | External Standard | 0.000 |

| Hit# | of | 5 | Tentative ID | MW  | MolForm | CAS#        | Qual |
|------|----|---|--------------|-----|---------|-------------|------|
| 1    |    |   | Tridecane    | 184 | C13H28  | 000629-50-5 | 97   |
| 2    |    |   | Tridecane    | 184 | C13H28  | 000629-50-5 | 96   |
| 3    |    |   | Tridecane    | 184 | C13H28  | 000629-50-5 | 93   |
| 4    |    |   | Tridecane    | 184 | C13H28  | 000629-50-5 | 90   |
| 5    |    |   | Tetradecane  | 198 | C14H30  | 000629-59-4 | 86   |

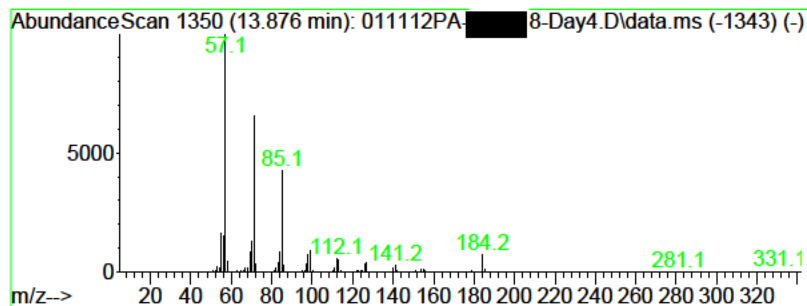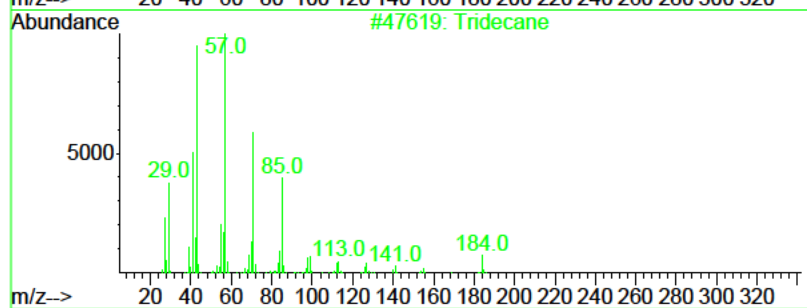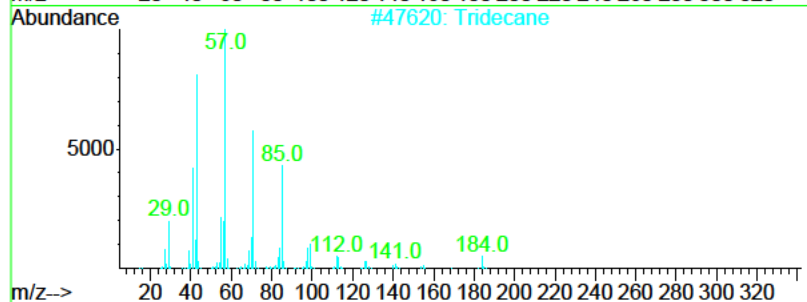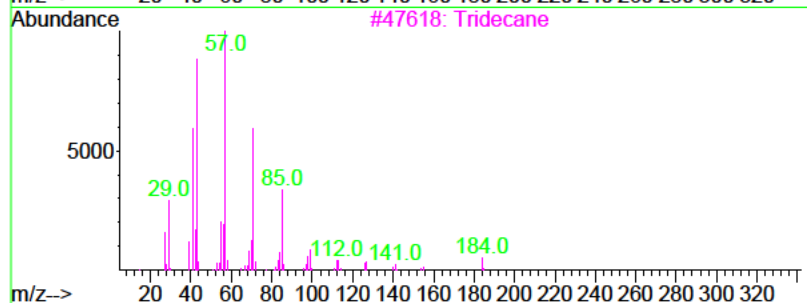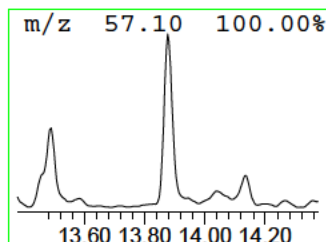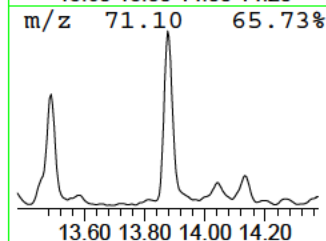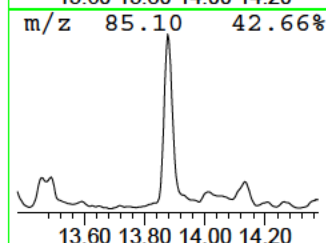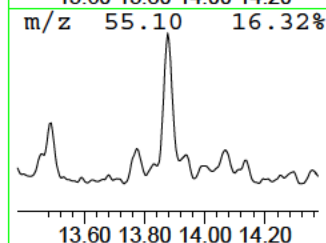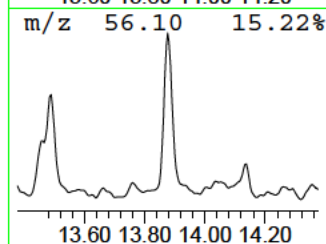

Data Path : C:\msdchem\1\LEGACY\2012\January\  
Data File : 011112PA-8-Day4.D  
Acq On : 11 Jan 2012 14:47  
Operator :  
Sample : PA-Blaker8-Day4  
Misc : 1.0 uL PA-8-Day4 at 1 mL dilute 1/10  
ALS Vial : 60 Sample Multiplier: 1

Quant Method : C:\msdchem\1\METHODS\TLTICPAH.M  
Quant Title : PAH5437

TIC Library : C:\Database\NIST08.L  
TIC Integration Parameters: rteint.p

\*\*\*\*\*  
Peak Number 2 Tetradecane Concentration Rank 3

| R.T.   | EstConc  | Area   | Relative to ISTD  | R.T.  |
|--------|----------|--------|-------------------|-------|
| 15.305 | 60.61 ng | 606069 | External Standard | 0.000 |

| Hit# | of | 5 | Tentative ID | MW  | MolForm | CAS#        | Qual |
|------|----|---|--------------|-----|---------|-------------|------|
| 1    |    |   | Tetradecane  | 198 | C14H30  | 000629-59-4 | 97   |
| 2    |    |   | Tetradecane  | 198 | C14H30  | 000629-59-4 | 96   |
| 3    |    |   | Tetradecane  | 198 | C14H30  | 000629-59-4 | 95   |
| 4    |    |   | Tetradecane  | 198 | C14H30  | 000629-59-4 | 93   |
| 5    |    |   | Tridecane    | 184 | C13H28  | 000629-50-5 | 90   |

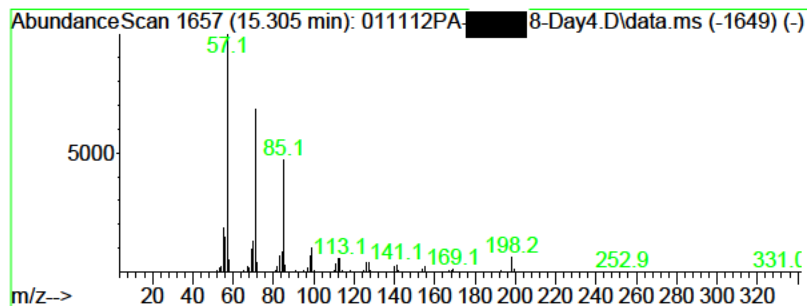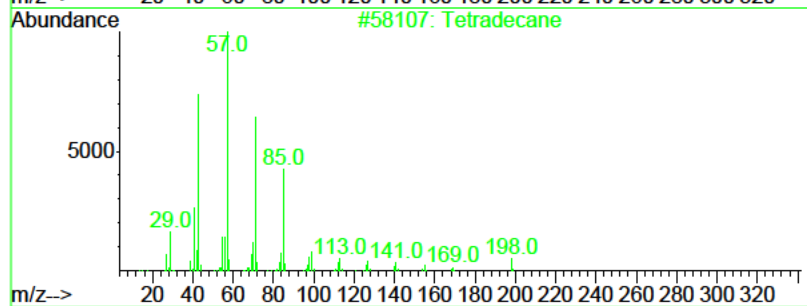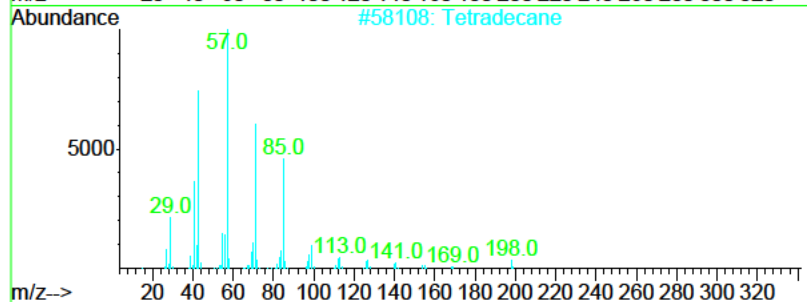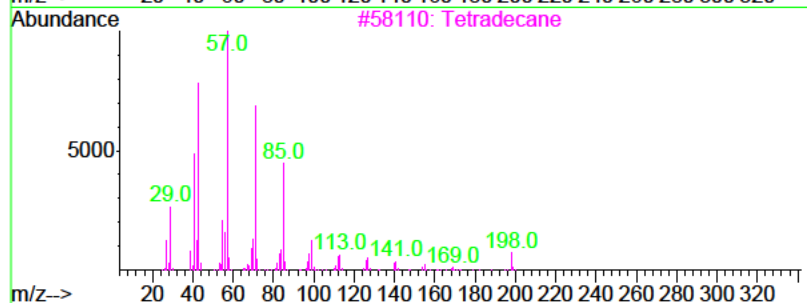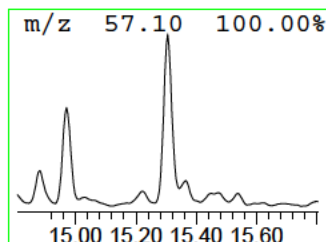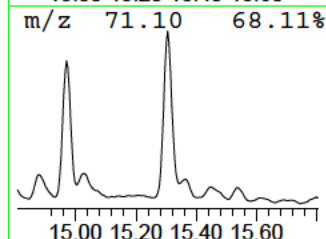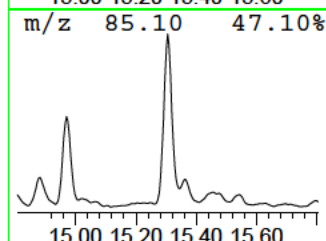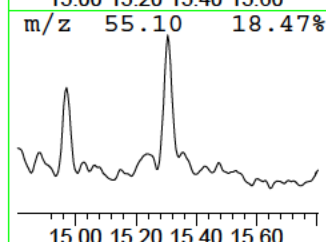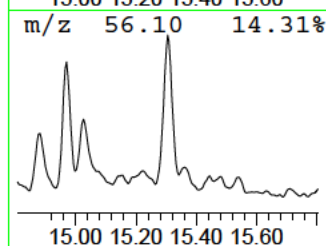

Data Path : C:\msdchem\1\LEGACY\2012\January\  
Data File : 011112PA-8-Day4.D  
Acq On : 11 Jan 2012 14:47  
Operator :  
Sample : PA-Blaker8-Day4  
Misc : 1.0 uL PA-8-Day4 at 1 mL dilute 1/10  
ALS Vial : 60 Sample Multiplier: 1

Quant Method : C:\msdchem\1\METHODS\TLTICPAH.M  
Quant Title : PAH5437

TIC Library : C:\Database\NIST08.L  
TIC Integration Parameters: rteint.p

\*\*\*\*\*  
Peak Number 3 Phthalic acid, 6-ethyloct-3... Concentration Rank 1

| R.T.   | EstConc    | Area     | Relative to ISTD  | R.T.  |
|--------|------------|----------|-------------------|-------|
| 33.498 | 1694.21 ng | 16942100 | External Standard | 0.000 |

| Hit# | of | 5 | Tentative ID                        | MW  | MolForm  | CAS#         | Qual |
|------|----|---|-------------------------------------|-----|----------|--------------|------|
| 1    |    |   | Phthalic acid, 6-ethyloct-3-yl 2... | 418 | C26H42O4 | 1000315-53-8 | 90   |
| 2    |    |   | 1,2-Benzenedicarboxylic acid, di... | 390 | C24H38O4 | 027554-26-3  | 64   |
| 3    |    |   | 1,2-Benzenedicarboxylic acid, di... | 390 | C24H38O4 | 027554-26-3  | 64   |
| 4    |    |   | Bis(2-ethylhexyl) phthalate         | 390 | C24H38O4 | 000117-81-7  | 64   |
| 5    |    |   | 1,2-Benzenedicarboxylic acid, mo... | 278 | C16H22O4 | 004376-20-9  | 62   |

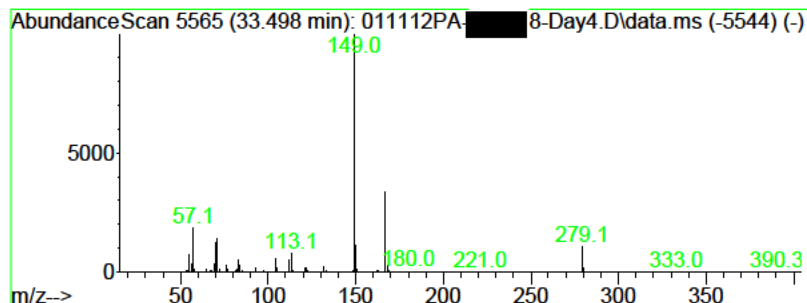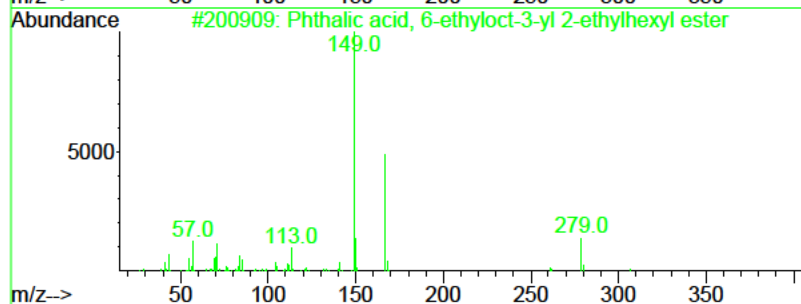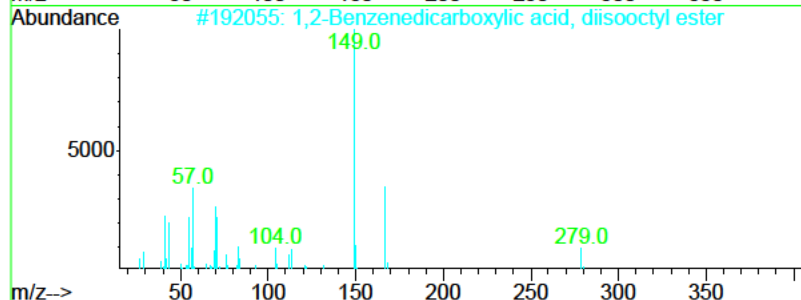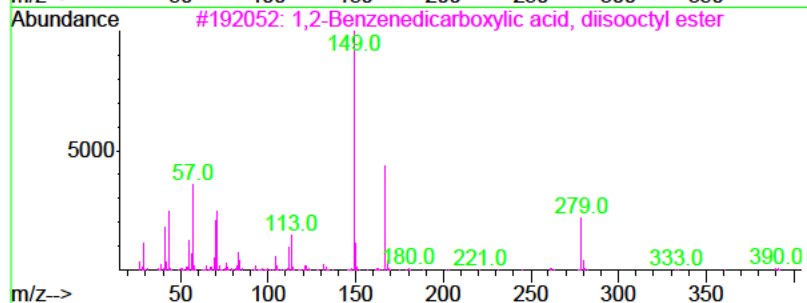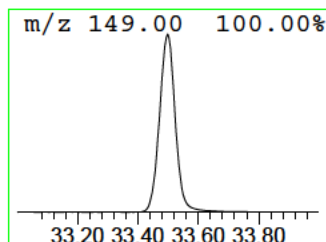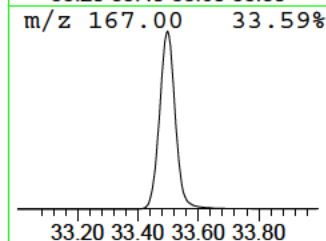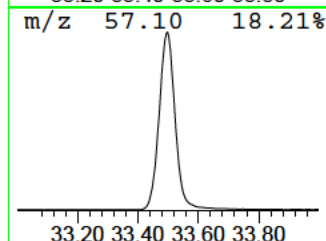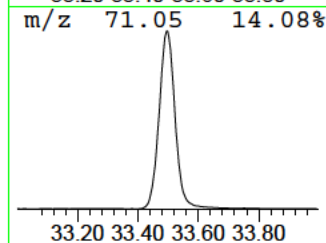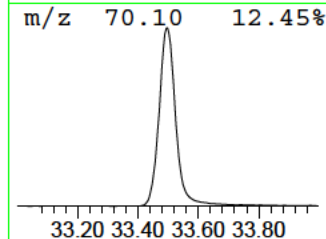

Data Path : C:\msdchem\1\LEGACY\2012\January\  
Data File : 011112PA-8-Day4.D  
Acq On : 11 Jan 2012 14:47  
Operator :  
Sample : PA-Blaker8-Day4  
Misc : 1.0 uL PA-8-Day4 at 1 mL dilute 1/10  
ALS Vial : 60 Sample Multiplier: 1

Quant Method : C:\msdchem\1\METHODS\TLTICPAH.M  
Quant Title : PAH5437

TIC Library : C:\Database\NIST08.L  
TIC Integration Parameters: rteint.p

| TIC Top Hit name   | RT     | EstConc | Units | Response | --Internal Standard-- |       |       |      |
|--------------------|--------|---------|-------|----------|-----------------------|-------|-------|------|
|                    |        |         |       |          | #                     | RT    | Resp  | Conc |
| Tridecane          | 13.876 | 62.8    | ng    | 628225   | 0                     | 0.000 | 10000 | 1.0  |
| Tetradecane        | 15.305 | 60.6    | ng    | 606069   | 0                     | 0.000 | 10000 | 1.0  |
| Phthalic acid, ... | 33.498 | 1694.2  | ng    | 16942100 | 0                     | 0.000 | 10000 | 1.0  |
