# Supplementary material
Source: publisher figshare collection journal article supplement (https://wiley.figshare.com/articles/dataset/_/6176210)
Supplement: Supplementary file 8 [file 1]

Data Path : C:\msdchem\1\LEGACY\2012\February\  
Data File : 020112PA-[REDACTED]-Day6-rerun.D  
Acq On : 1 Feb 2012 11:44  
Operator :  
Sample : PA-[REDACTED]-Day6-rerun  
Misc : 1 uL PA-[REDACTED]-Day6-rerun at 1 mL  
ALS Vial : 85 Sample Multiplier: 1

Integration Parameters: rteint.p

Integrator: RTE

Smoothing : ON

Sampling : 1

Start Thrs: 0.2

Stop Thrs : 0

Filtering: 5

Min Area: 3 % of largest Peak

Max Peaks: 100

Peak Location: TOP

If leading or trailing edge < 100 prefer < Baseline drop else tangent >

Peak separation: 5

Method : C:\msdchem\1\METHODS\TLTICPAH.M

Title : PAH5437

Signal : TIC: 020112PA-[REDACTED]-Day6-rerun.D\data.ms

| peak<br># | R.T.<br>min | first<br>scan | max<br>scan | last<br>scan | PK<br>TY | peak<br>height | corr.<br>area | corr.<br>% max. | % of<br>total |
|-----------|-------------|---------------|-------------|--------------|----------|----------------|---------------|-----------------|---------------|
| 1         | 9.528       | 407           | 416         | 465          | rVB2     | 1203557        | 4806970       | 4.61%           | 4.221%        |
| 2         | 11.781      | 862           | 900         | 931          | rBV      | 17674314       | 104339827     | 100.00%         | 91.626%       |
| 3         | 17.763      | 2171          | 2185        | 2216         | rBV2     | 882264         | 4728616       | 4.53%           | 4.152%        |

Sum of corrected areas: 113875413

Data Path : C:\msdchem\1\LEGACY\2012\February\  
Data File : 020112PA-[REDACTED]-Day6-rerun.D  
Acq On : 1 Feb 2012 11:44  
Operator :  
Sample : PA-[REDACTED]-Day6-rerun  
Misc : 1 uL PA-[REDACTED]-Day6-rerun at 1 mL  
ALS Vial : 85 Sample Multiplier: 1

Quant Method : C:\msdchem\1\METHODS\TLTICPAH.M  
Quant Title : PAH5437

TIC Library : C:\Database\NIST08.L  
TIC Integration Parameters: rteint.p

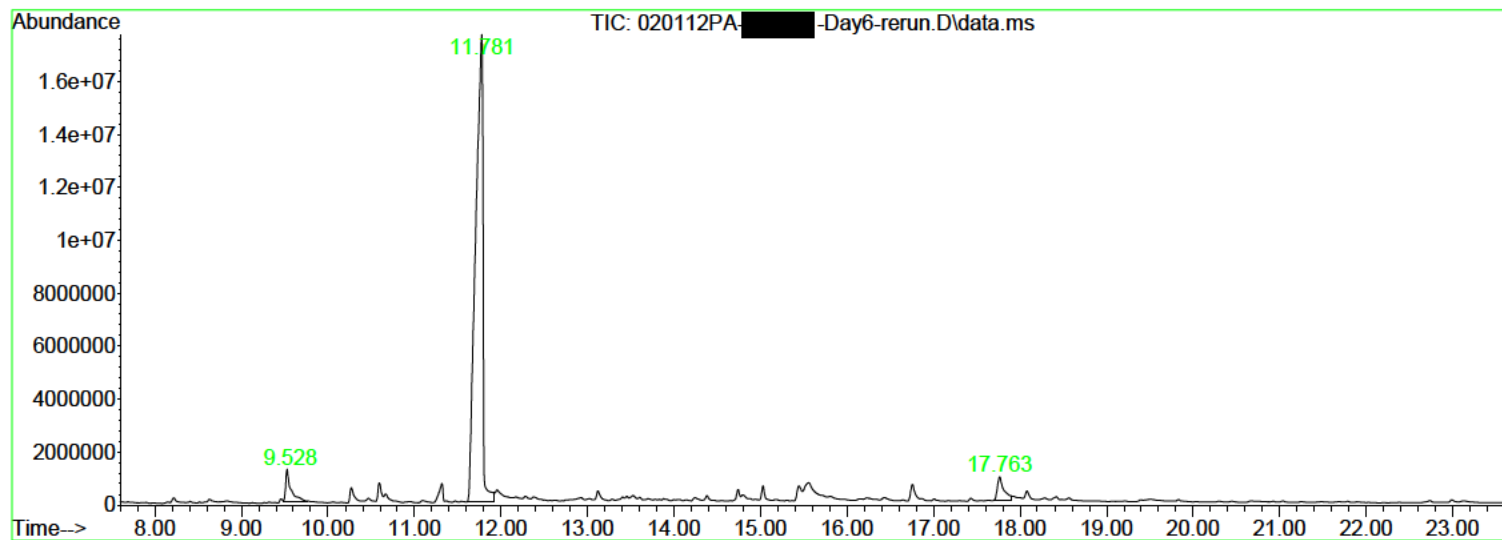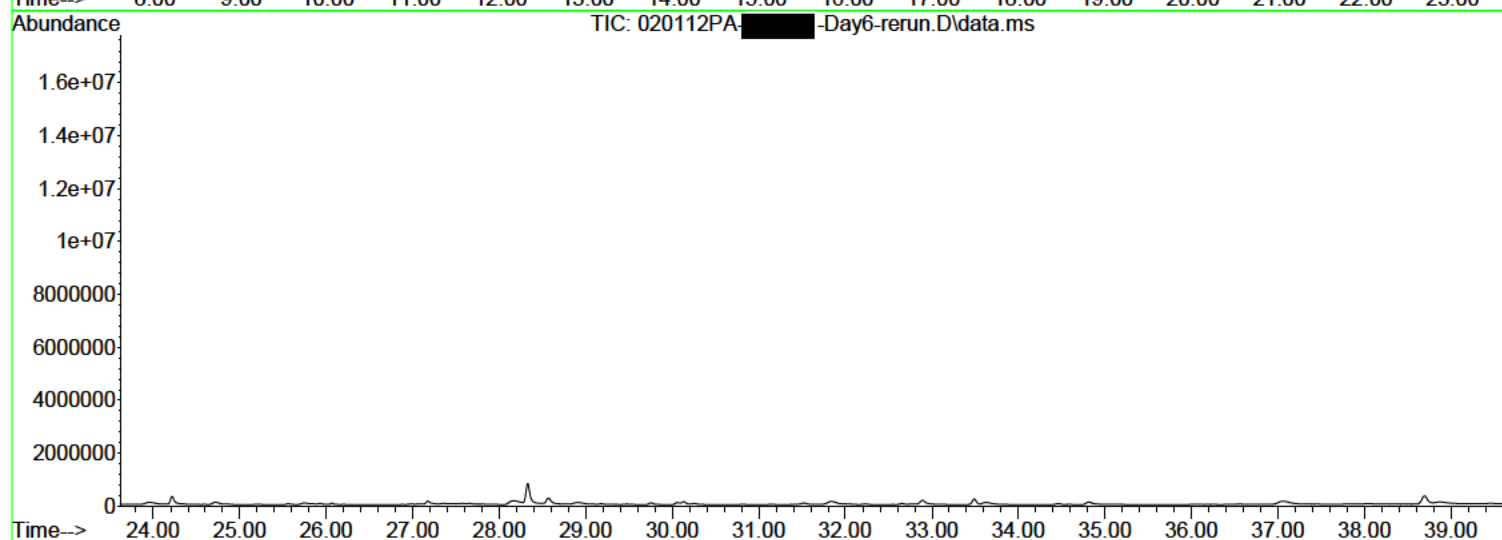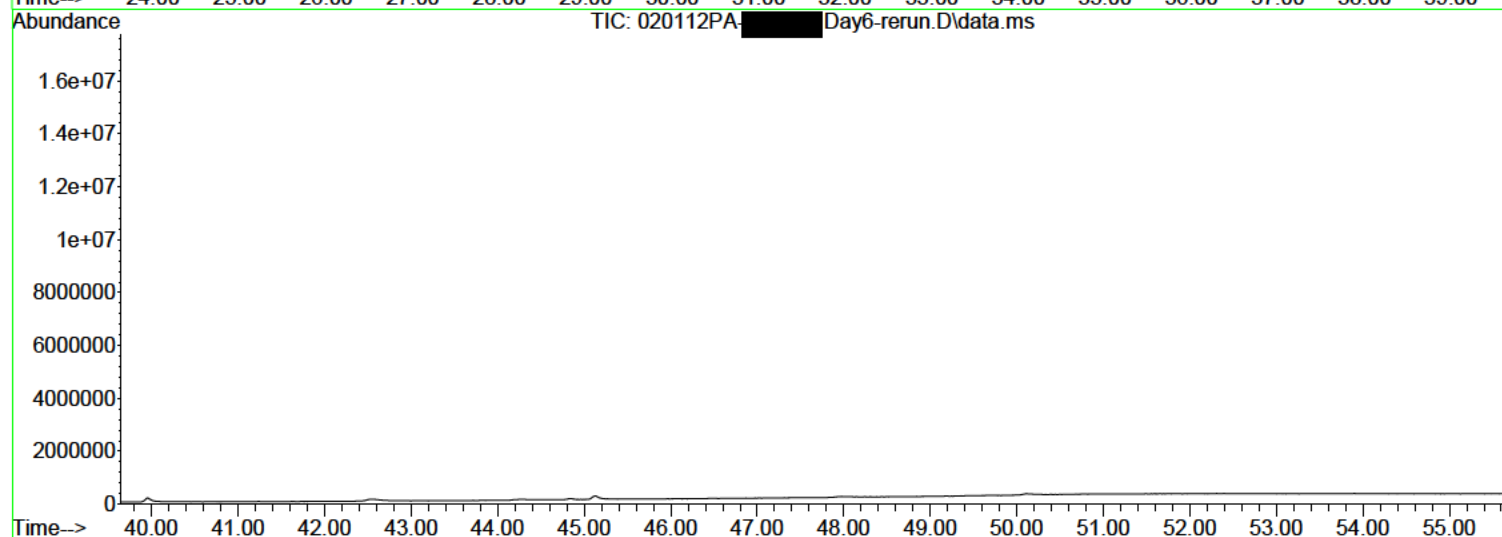

Data Path : C:\msdchem\1\LEGACY\2012\February\  
Data File : 020112PA-[REDACTED]-Day6-rerun.D  
Acq On : 1 Feb 2012 11:44  
Operator :  
Sample : PA-Blaker8-Day6-rerun  
Misc : 1 uL PA-[REDACTED]-Day6-rerun at 1 mL  
ALS Vial : 85 Sample Multiplier: 1

Quant Method : C:\msdchem\1\METHODS\TLTICPAH.M  
Quant Title : PAH5437

TIC Library : C:\Database\NIST08.L  
TIC Integration Parameters: rteint.p

\*\*\*\*\*  
Peak Number 1 1-Hexanol, 2-ethyl- Concentration Rank 2

| R.T.  | EstConc   | Area    | Relative to ISTD  | R.T.  |
|-------|-----------|---------|-------------------|-------|
| 9.528 | 480.70 ng | 4806970 | External Standard | 0.000 |

| Hit# | of | 5 | Tentative ID                        | MW  | MolForm    | CAS#        | Qual |
|------|----|---|-------------------------------------|-----|------------|-------------|------|
| 1    |    |   | 1-Hexanol, 2-ethyl-                 | 130 | C8H18O     | 000104-76-7 | 83   |
| 2    |    |   | 1-Hexanol, 2-ethyl-                 | 130 | C8H18O     | 000104-76-7 | 83   |
| 3    |    |   | 1-Hexanol, 2-ethyl-                 | 130 | C8H18O     | 000104-76-7 | 83   |
| 4    |    |   | 1-Hexanol, 2-ethyl-                 | 130 | C8H18O     | 000104-76-7 | 64   |
| 5    |    |   | Chloroacetic acid, 2-ethylhexyl ... | 206 | C10H19ClO2 | 005345-58-4 | 59   |

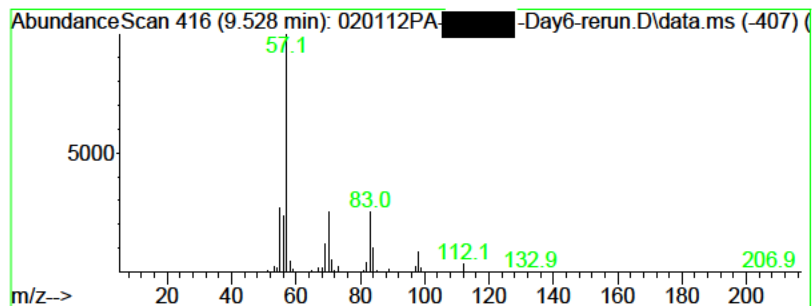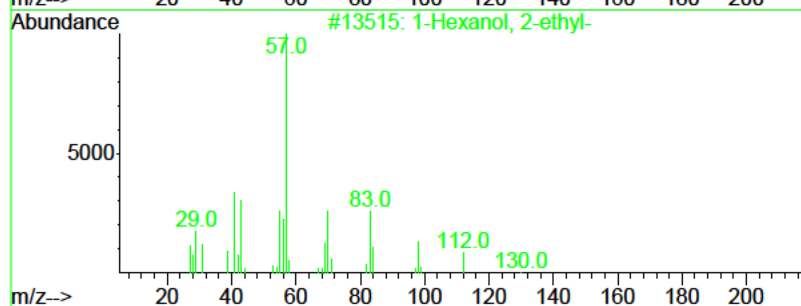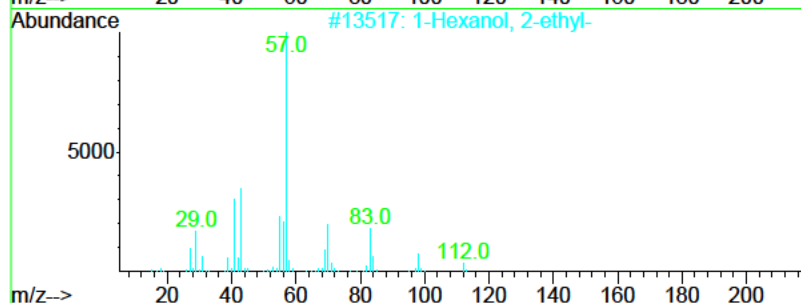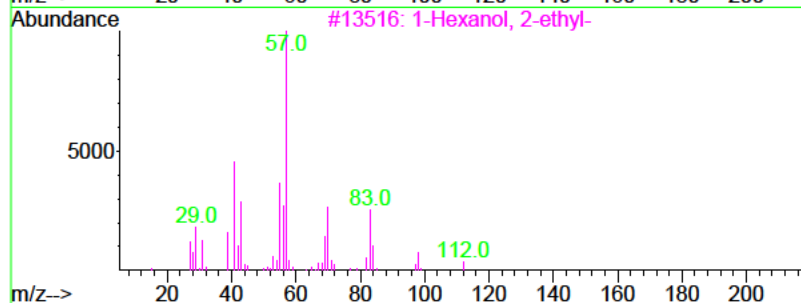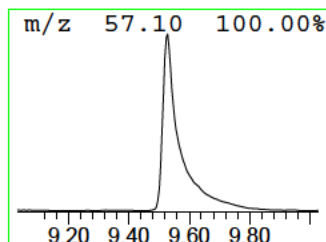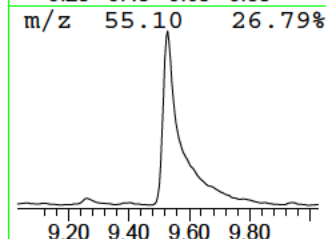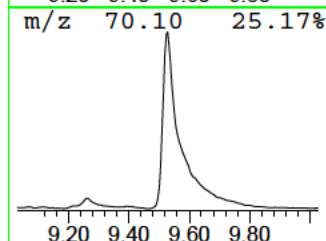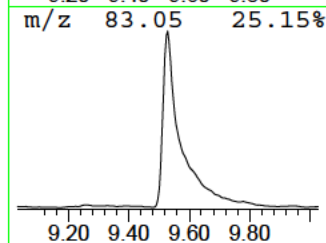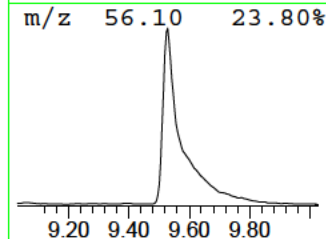

Data Path : C:\msdchem\1\LEGACY\2012\February\  
Data File : 020112PA-[REDACTED]-Day6-rerun.D  
Acq On : 1 Feb 2012 11:44  
Operator :  
Sample : PA-Blaker8-Day6-rerun  
Misc : 1 uL PA-[REDACTED]-Day6-rerun at 1 mL  
ALS Vial : 85 Sample Multiplier: 1

Quant Method : C:\msdchem\1\METHODS\TLTICPAH.M  
Quant Title : PAH5437

TIC Library : C:\Database\NIST08.L  
TIC Integration Parameters: rteint.p

\*\*\*\*\*  
Peak Number 2 1,3-Pentanediol, 2,2,4-trimethyl- Concentration Rank 1

| R.T.   | EstConc     | Area      | Relative to ISTD  | R.T.  |
|--------|-------------|-----------|-------------------|-------|
| 11.781 | 10434.00 ng | 104340000 | External Standard | 0.000 |

| Hit# | of 5 | Tentative ID                      | MW  | MolForm | CAS#        | Qual |
|------|------|-----------------------------------|-----|---------|-------------|------|
| 1    |      | 1,3-Pentanediol, 2,2,4-trimethyl- | 146 | C8H18O2 | 000144-19-4 | 90   |
| 2    |      | 1,3-Pentanediol, 2,2,4-trimethyl- | 146 | C8H18O2 | 000144-19-4 | 78   |
| 3    |      | 1,3-Pentanediol, 2,2,4-trimethyl- | 146 | C8H18O2 | 000144-19-4 | 53   |
| 4    |      | 1-Hexene, 5-methyl-               | 98  | C7H14   | 003524-73-0 | 25   |
| 5    |      | Decane, 5-methyl-6-methylene-     | 168 | C12H24  | 075029-95-7 | 23   |

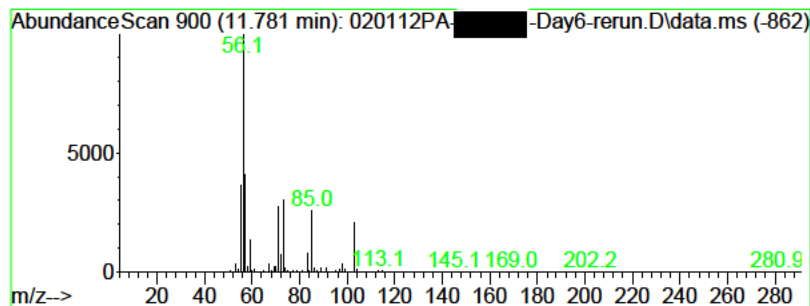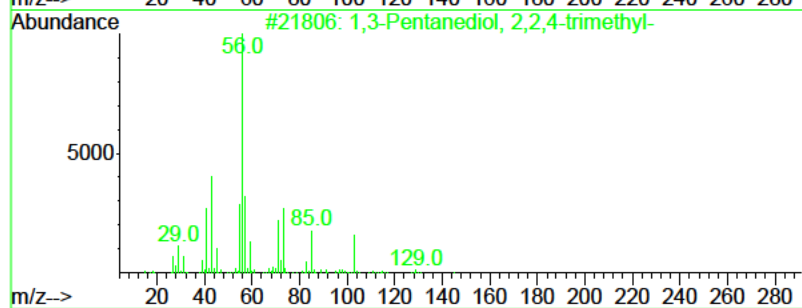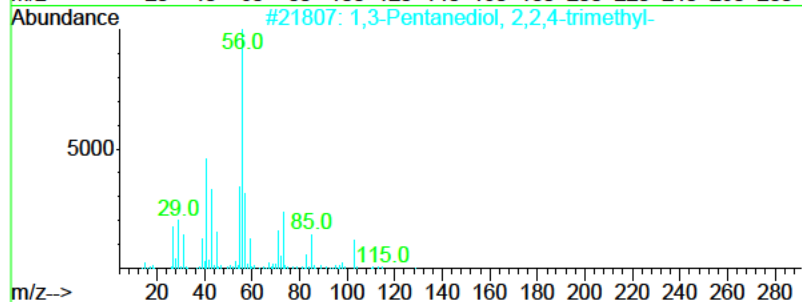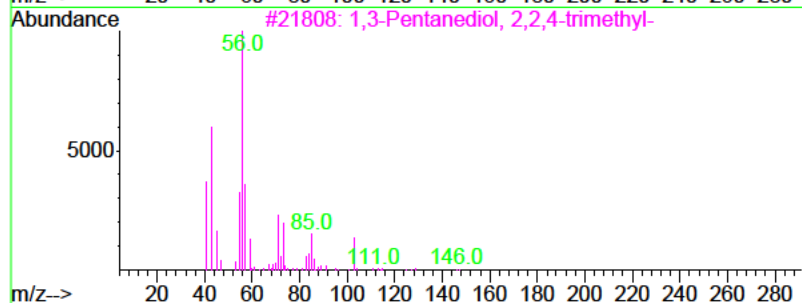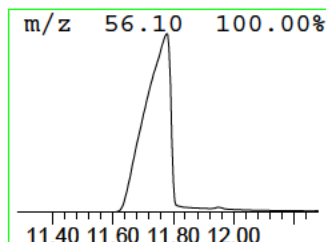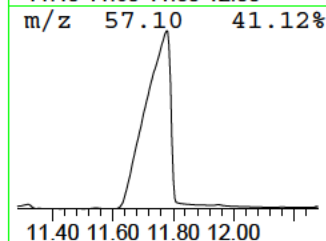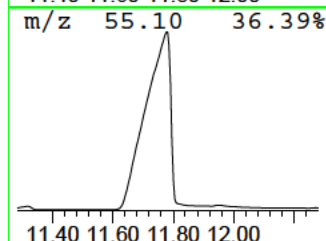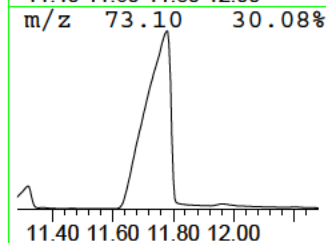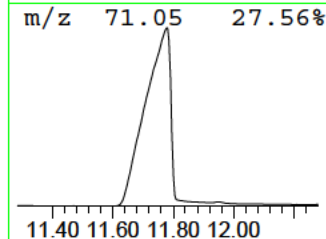

Data Path : C:\msdchem\1\LEGACY\2012\February\  
Data File : 020112PA- -Day6-rerun.D  
Acq On : 1 Feb 2012 11:44  
Operator :  
Sample : PA-Blaker8-Day6-rerun  
Misc : 1 uL PA- -Day6-rerun at 1 mL  
ALS Vial : 85 Sample Multiplier: 1

Quant Method : C:\msdchem\1\METHODS\TLTICPAH.M  
Quant Title : PAH5437

TIC Library : C:\Database\NIST08.L  
TIC Integration Parameters: rteint.p

\*\*\*\*\*  
Peak Number 3 Dodecanoic acid Concentration Rank 3

| R.T.   | EstConc   | Area    | Relative to ISTD  | R.T.  |
|--------|-----------|---------|-------------------|-------|
| 17.763 | 472.86 ng | 4728620 | External Standard | 0.000 |

| Hit# | of | 5 | Tentative ID    | MW  | MolForm  | CAS#        | Qual |
|------|----|---|-----------------|-----|----------|-------------|------|
| 1    |    |   | Dodecanoic acid | 200 | C12H24O2 | 000143-07-7 | 99   |
| 2    |    |   | Dodecanoic acid | 200 | C12H24O2 | 000143-07-7 | 98   |
| 3    |    |   | Dodecanoic acid | 200 | C12H24O2 | 000143-07-7 | 93   |
| 4    |    |   | Dodecanoic acid | 200 | C12H24O2 | 000143-07-7 | 64   |
| 5    |    |   | n-Decanoic acid | 172 | C10H20O2 | 000334-48-5 | 62   |

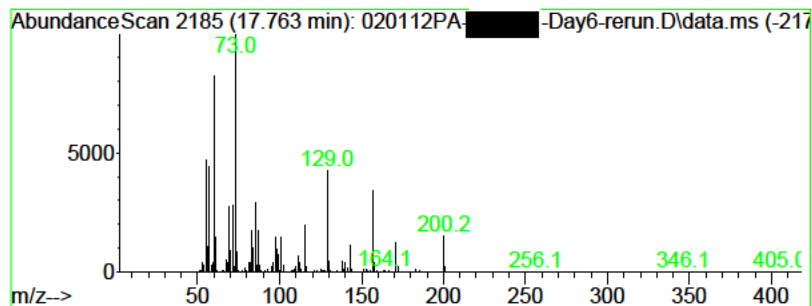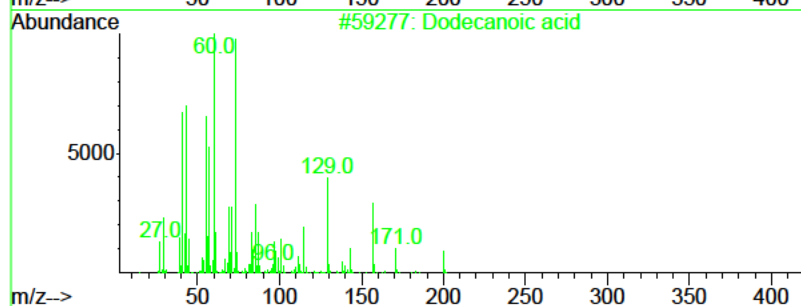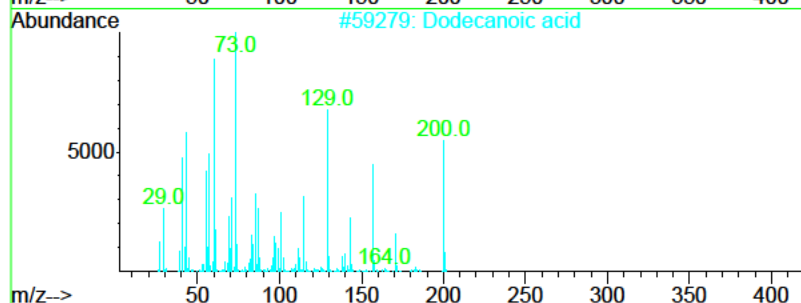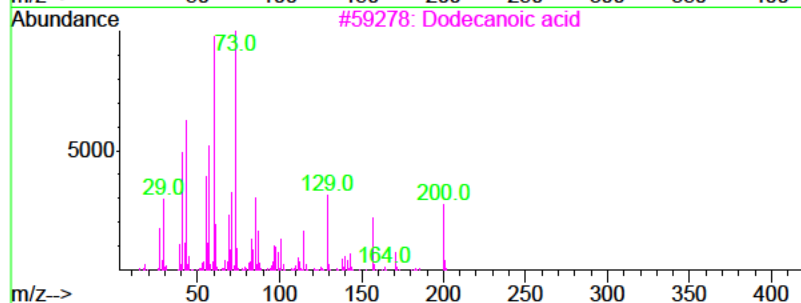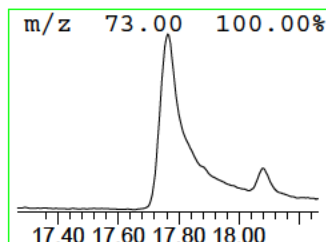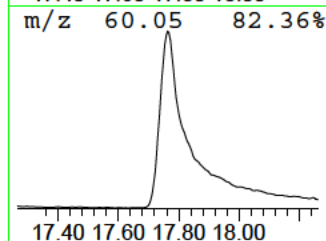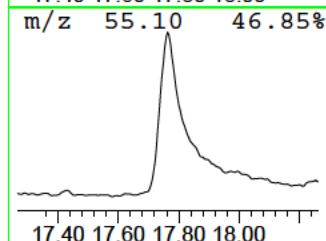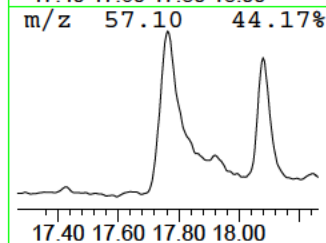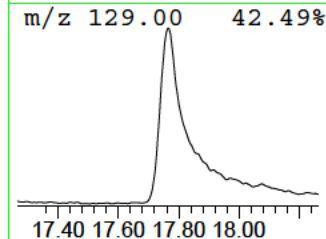

Data Path : C:\msdchem\1\LEGACY\2012\February\  
Data File : 020112PA-[REDACTED]-Day6-rerun.D  
Acq On : 1 Feb 2012 11:44  
Operator :  
Sample : PA-Blaker8-Day6-rerun  
Misc : 1 uL PA-[REDACTED]-Day6-rerun at 1 mL  
ALS Vial : 85 Sample Multiplier: 1

Quant Method : C:\msdchem\1\METHODS\TLTICPAH.M  
Quant Title : PAH5437

TIC Library : C:\Database\NIST08.L  
TIC Integration Parameters: rteint.p

| TIC Top Hit name   | RT     | EstConc | Units | Response  | --Internal Standard--- |       |       |      |
|--------------------|--------|---------|-------|-----------|------------------------|-------|-------|------|
|                    |        |         |       |           | #                      | RT    | Resp  | Conc |
| 1-Hexanol, 2-et... | 9.528  | 480.7   | ng    | 4806970   | 0                      | 0.000 | 10000 | 1.0  |
| 1,3-Pentenediol... | 11.781 | 10434.0 | ng    | 104340000 | 0                      | 0.000 | 10000 | 1.0  |
| Dodecanoic acid    | 17.763 | 472.9   | ng    | 4728620   | 0                      | 0.000 | 10000 | 1.0  |
