# Supplementary material
Source: publisher figshare collection journal article supplement (https://wiley.figshare.com/articles/dataset/_/6176210)
Supplement: Supplementary file 9 [file 1]

Data Path : C:\msdchem\1\LEGACY\2012\January\  
Data File : 011112PA- 8-Day2.D  
Acq On : 11 Jan 2012 9:04  
Operator :  
Sample : PA- 8-Day2  
Misc : 1.0 uL PA- 8-Day2 at 1 mL dilute 1/10  
ALS Vial : 58 Sample Multiplier: 1

## Integration Parameters: rteint.p

Integrator: RTE  
Smoothing : ON  
Sampling : 1  
Start Thrs: 0.2  
Stop Thrs : 0

Filtering: 5  
Min Area: 3 % of largest Peak  
Max Peaks: 100  
Peak Location: TOP

If leading or trailing edge < 100 prefer < Baseline drop else tangent >  
Peak separation: 5

Method : C:\msdchem\1\METHODS\TLTICPAH.M  
Title : PAH5437

Signal : TIC: 011112PA- 8-Day2.D\data.ms

| peak<br># | R.T.<br>min | first<br>scan | max<br>scan | last<br>scan | PK<br>TY | peak<br>height | corr.<br>area | corr.<br>% max. | % of<br>total |
|-----------|-------------|---------------|-------------|--------------|----------|----------------|---------------|-----------------|---------------|
| 1         | 12.447      | 1029          | 1043        | 1064         | rBV2     | 34501395       | 109177099     | 12.63%          | 6.587%        |
| 2         | 12.647      | 1078          | 1086        | 1104         | rVB2     | 14545867       | 35364561      | 4.09%           | 2.134%        |
| 3         | 13.238      | 1202          | 1213        | 1222         | rBV3     | 9431488        | 36108269      | 4.18%           | 2.179%        |
| 4         | 13.392      | 1239          | 1246        | 1258         | rVV2     | 13448374       | 34967258      | 4.05%           | 2.110%        |
| 5         | 13.532      | 1260          | 1276        | 1287         | rVB2     | 25022880       | 83179774      | 9.62%           | 5.019%        |
| 6         | 13.946      | 1350          | 1365        | 1379         | rVB2     | 42659219       | 141914437     | 16.42%          | 8.562%        |
| 7         | 14.574      | 1492          | 1500        | 1506         | rBV2     | 12365169       | 30096113      | 3.48%           | 1.816%        |
| 8         | 14.816      | 1544          | 1552        | 1566         | rVV2     | 13995447       | 43904611      | 5.08%           | 2.649%        |
| 9         | 14.914      | 1567          | 1573        | 1584         | rVB      | 12254554       | 28385870      | 3.28%           | 1.713%        |
| 10        | 15.017      | 1585          | 1595        | 1602         | rBV      | 26045681       | 55660396      | 6.44%           | 3.358%        |
| 11        | 15.366      | 1657          | 1670        | 1676         | rBV      | 32533434       | 86770213      | 10.04%          | 5.235%        |
| 12        | 16.269      | 1854          | 1864        | 1882         | rVB2     | 19973879       | 52066047      | 6.02%           | 3.141%        |
| 13        | 18.452      | 2322          | 2333        | 2361         | rVB      | 11920088       | 27894552      | 3.23%           | 1.683%        |
| 14        | 20.049      | 2664          | 2676        | 2693         | rVB2     | 11083223       | 27549680      | 3.19%           | 1.662%        |
| 15        | 33.777      | 5548          | 5625        | 5627         | rBV3     | 74266447       | 864368321     | 100.00%         | 52.152%       |

Sum of corrected areas: 1657407201

Data Path : C:\msdchem\1\LEGACY\2012\January\  
Data File : 011112PA-8-Day2.D  
Acq On : 11 Jan 2012 9:04  
Operator :  
Sample : PA-Blaker8-Day2  
Misc : 1.0 uL PA-8-Day2 at 1 mL dilute 1/10  
ALS Vial : 58 Sample Multiplier: 1

Quant Method : C:\msdchem\1\METHODS\TLTICPAH.M  
Quant Title : PAH5437

TIC Library : C:\Database\NIST08.L  
TIC Integration Parameters: rteint.p

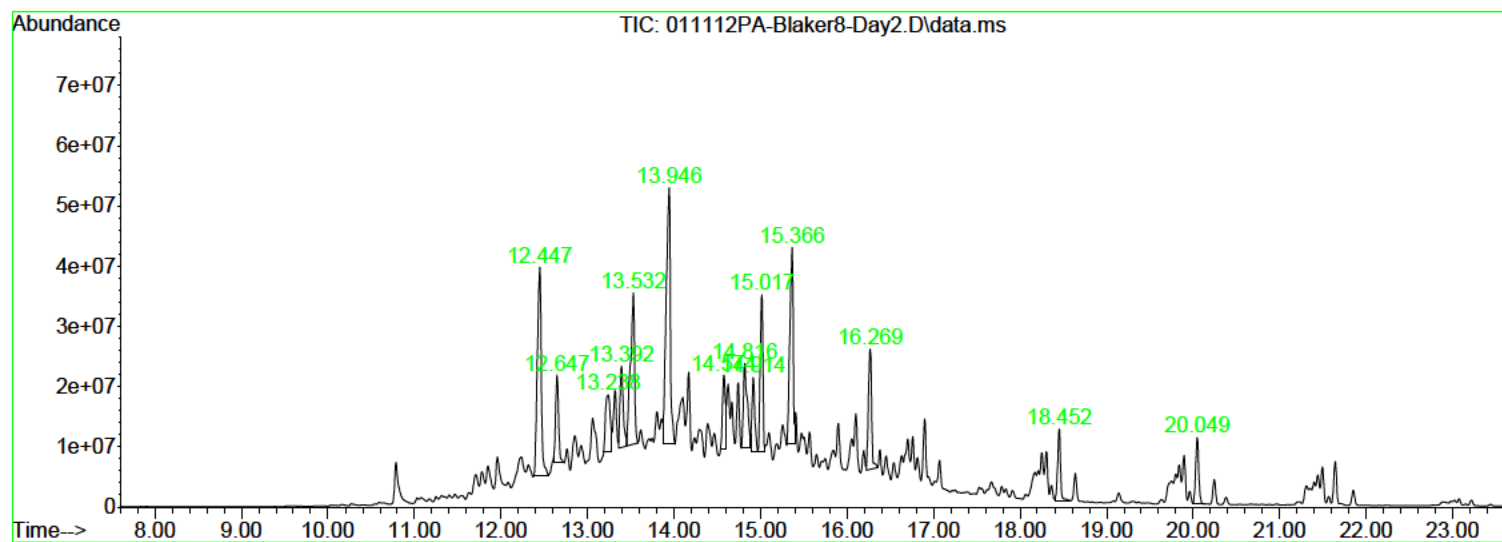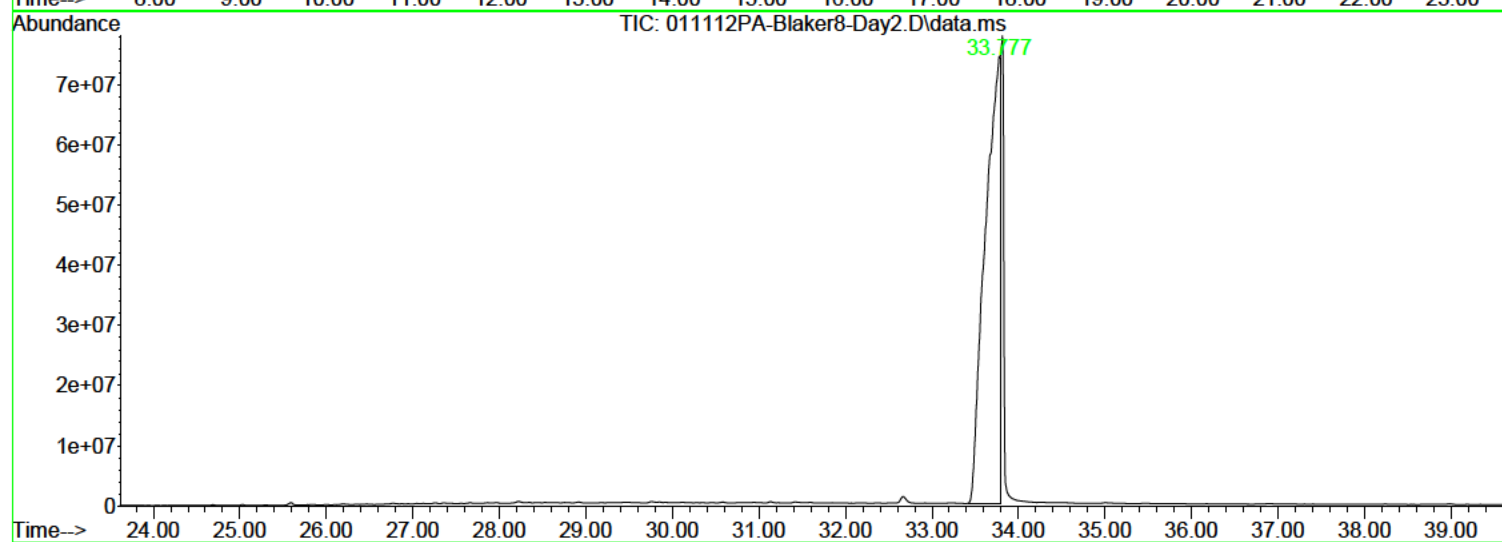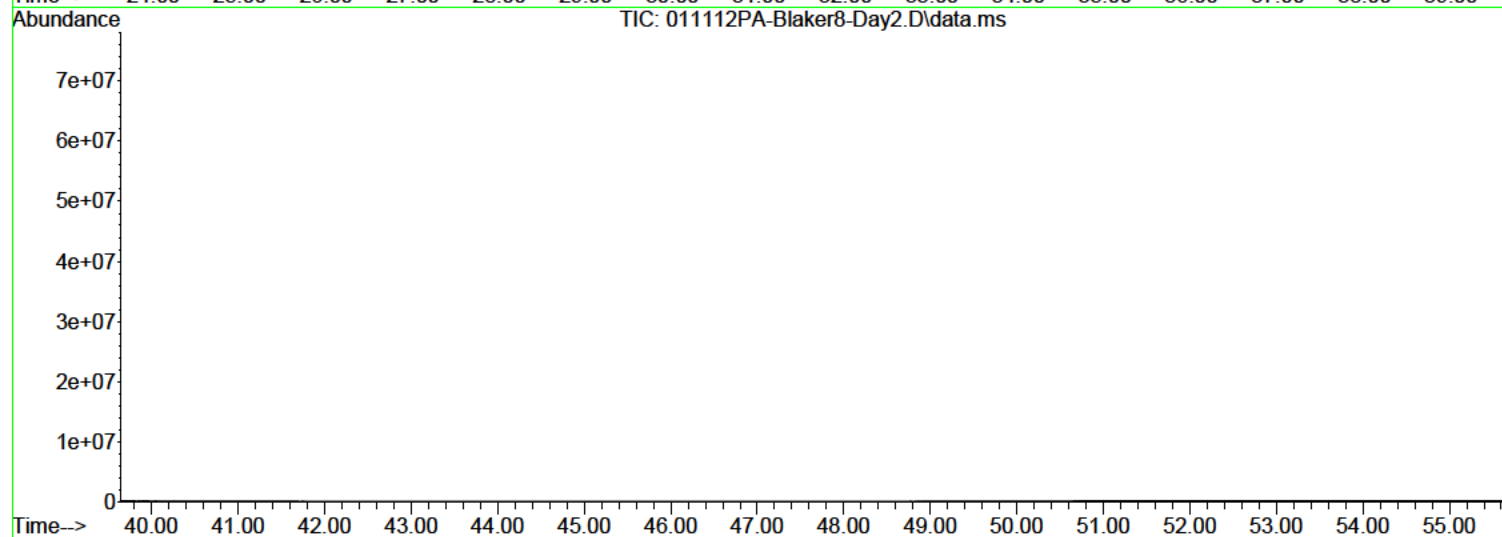

Data Path : C:\msdchem\1\LEGACY\2012\January\  
Data File : 011112PA- 8-Day2.D  
Acq On : 11 Jan 2012 9:04  
Operator :  
Sample : PA- 8-Day2  
Misc : 1.0 uL PA- 8-Day2 at 1 mL dilute 1/10  
ALS Vial : 58 Sample Multiplier: 1

Quant Method : C:\msdchem\1\METHODS\TLTICPAH.M  
Quant Title : PAH5437

TIC Library : C:\Database\NIST08.L  
TIC Integration Parameters: rteint.p

\*\*\*\*\*  
Peak Number 1 Dodecane Concentration Rank 3

| R.T.   | EstConc     | Area      | Relative to ISTD  | R.T.  |
|--------|-------------|-----------|-------------------|-------|
| 12.447 | 10917.70 ng | 109177000 | External Standard | 0.000 |

| Hit# | of                      | 5 | Tentative ID | MW  | MolForm | CAS#        | Qual |
|------|-------------------------|---|--------------|-----|---------|-------------|------|
| 1    | Dodecane                |   |              | 170 | C12H26  | 000112-40-3 | 95   |
| 2    | Tridecane               |   |              | 184 | C13H28  | 000629-50-5 | 93   |
| 3    | Dodecane                |   |              | 170 | C12H26  | 000112-40-3 | 93   |
| 4    | Dodecane                |   |              | 170 | C12H26  | 000112-40-3 | 87   |
| 5    | Undecane, 4,6-dimethyl- |   |              | 184 | C13H28  | 017312-82-2 | 86   |

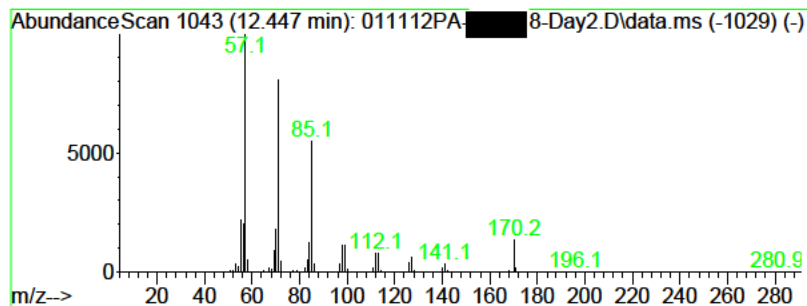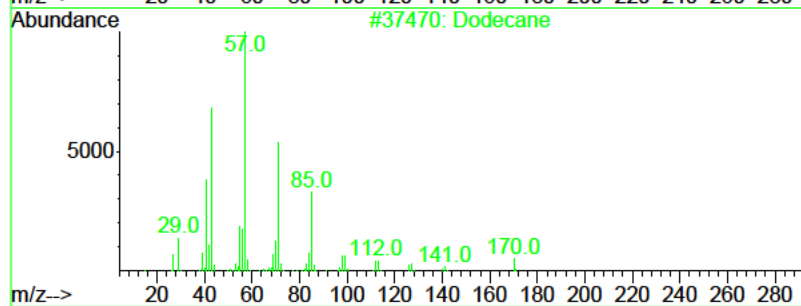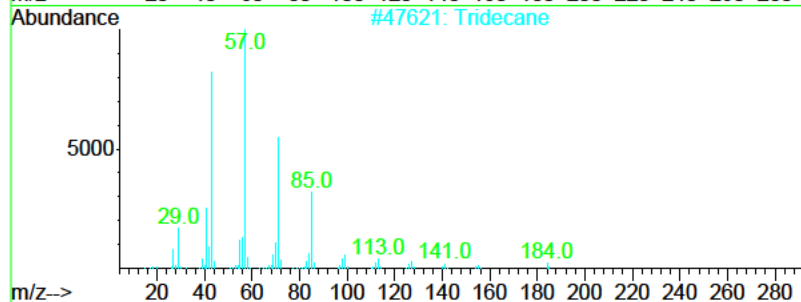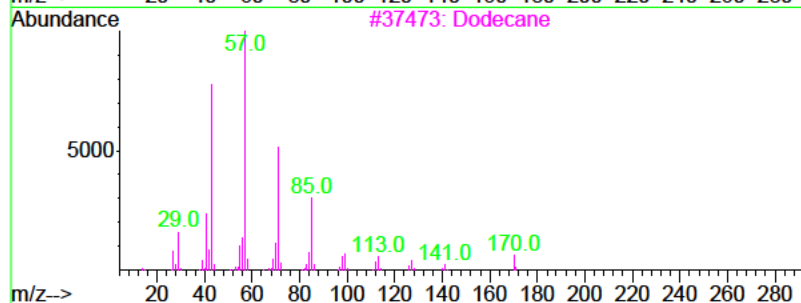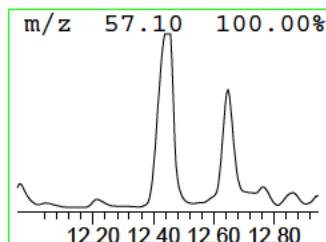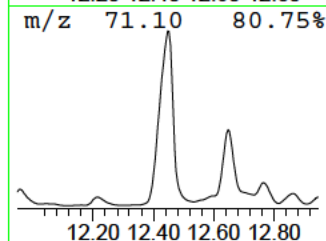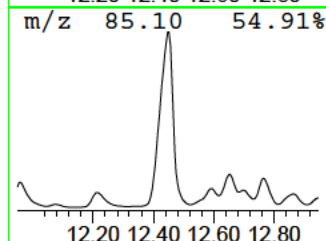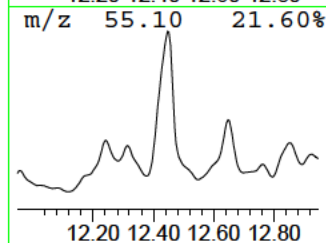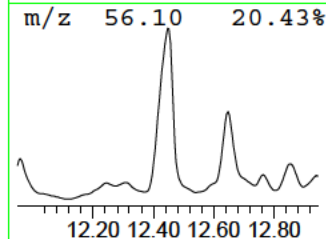

Data Path : C:\msdchem\1\LEGACY\2012\January\  
Data File : 011112PA-8-Day2.D  
Acq On : 11 Jan 2012 9:04  
Operator :  
Sample : PA-Blaker8-Day2  
Misc : 1.0 uL PA-8-Day2 at 1 mL dilute 1/10  
ALS Vial : 58 Sample Multiplier: 1

Quant Method : C:\msdchem\1\METHODS\TLTICPAH.M  
Quant Title : PAH5437

TIC Library : C:\Database\NIST08.L  
TIC Integration Parameters: rteint.p

\*\*\*\*\*  
Peak Number 2 Undecane, 2,6-dimethyl- Concentration Rank 10

| R.T.   | EstConc    | Area     | Relative to ISTD  | R.T.  |
|--------|------------|----------|-------------------|-------|
| 12.647 | 3536.46 ng | 35364600 | External Standard | 0.000 |

| Hit# | of | 5 | Tentative ID            | MW  | MolForm | CAS#        | Qual |
|------|----|---|-------------------------|-----|---------|-------------|------|
| 1    |    |   | Undecane, 2,6-dimethyl- | 184 | C13H28  | 017301-23-4 | 86   |
| 2    |    |   | Dodecane, 6-methyl-     | 184 | C13H28  | 006044-71-9 | 78   |
| 3    |    |   | Undecane, 2,6-dimethyl- | 184 | C13H28  | 017301-23-4 | 78   |
| 4    |    |   | Undecane, 2,5-dimethyl- | 184 | C13H28  | 017301-22-3 | 76   |
| 5    |    |   | Undecane, 2,6-dimethyl- | 184 | C13H28  | 017301-23-4 | 76   |

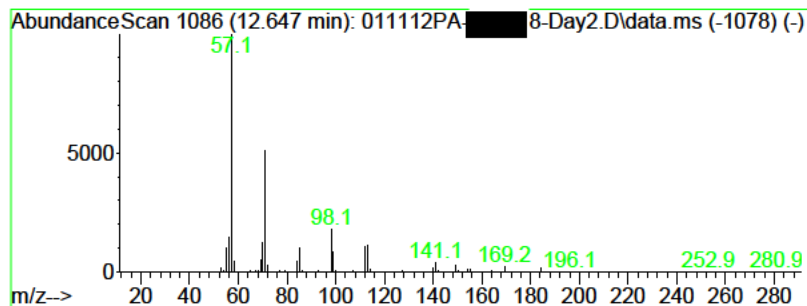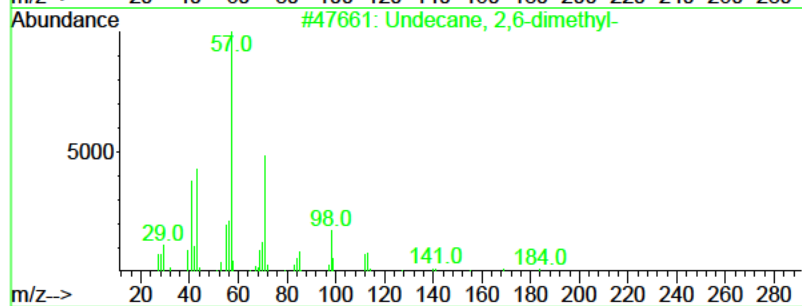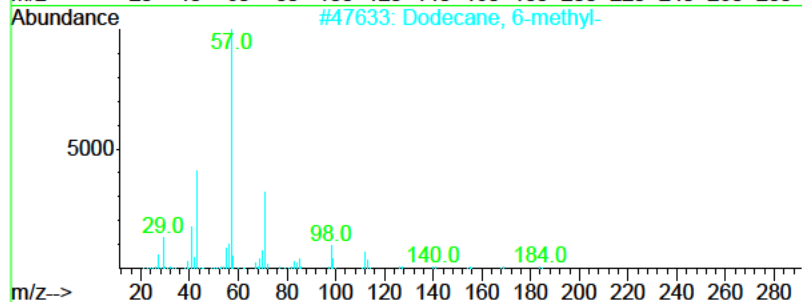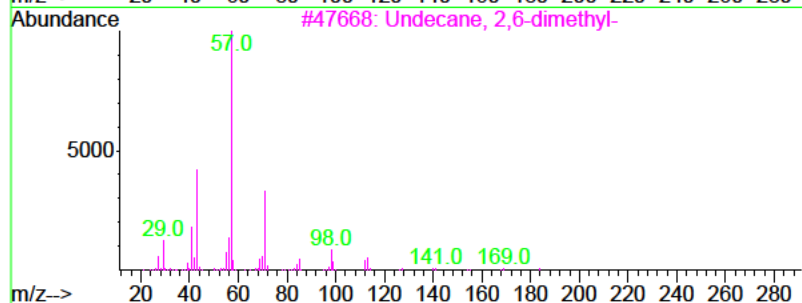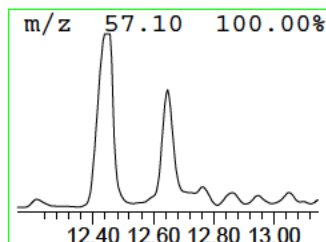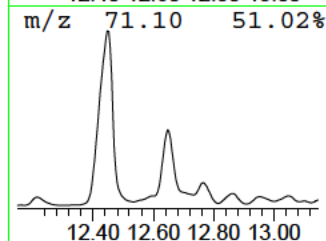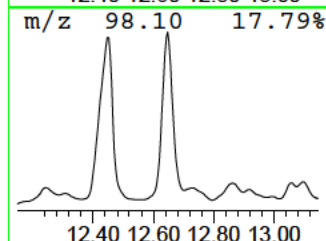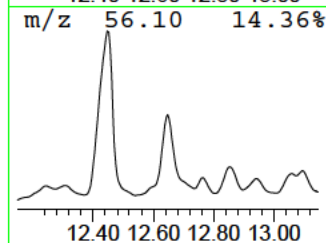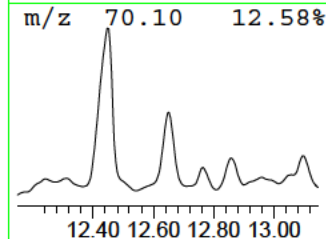

Data Path : C:\msdchem\1\LEGACY\2012\January\  
Data File : 011112PA-8-Day2.D  
Acq On : 11 Jan 2012 9:04  
Operator :  
Sample : PA-Blaker8-Day2  
Misc : 1.0 uL PA-8-Day2 at 1 mL dilute 1/10  
ALS Vial : 58 Sample Multiplier: 1

Quant Method : C:\msdchem\1\METHODS\TLTICPAH.M  
Quant Title : PAH5437

TIC Library : C:\Database\NIST08.L  
TIC Integration Parameters: rteint.p

\*\*\*\*\*  
Peak Number 3 Dodecane, 5-methyl- Concentration Rank 9

| R.T.      | EstConc                  | Area     | Relative to ISTD  | R.T.        |      |
|-----------|--------------------------|----------|-------------------|-------------|------|
| 13.238    | 3610.83 ng               | 36108300 | External Standard | 0.000       |      |
| Hit# of 5 | Tentative ID             | MW       | MolForm           | CAS#        | Qual |
| 1         | Dodecane, 5-methyl-      | 184      | C13H28            | 017453-93-9 | 72   |
| 2         | Undecane, 2,7-dimethyl-  | 184      | C13H28            | 017301-24-5 | 72   |
| 3         | Undecane, 5,7-dimethyl-  | 184      | C13H28            | 017312-83-3 | 64   |
| 4         | Hexane, 2,3,4-trimethyl- | 128      | C9H20             | 000921-47-1 | 58   |
| 5         | Undecane, 5-methyl-      | 170      | C12H26            | 001632-70-8 | 53   |

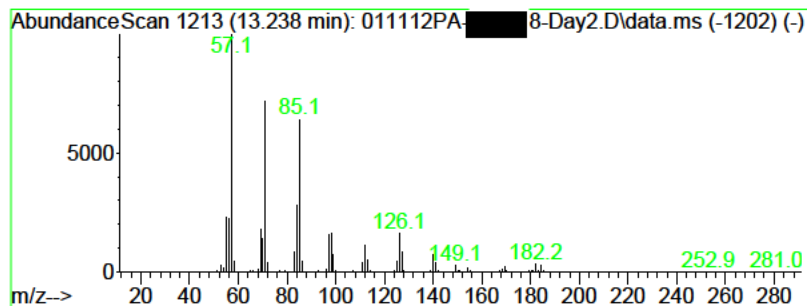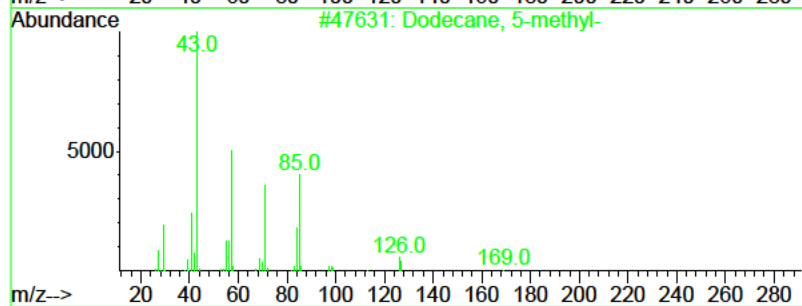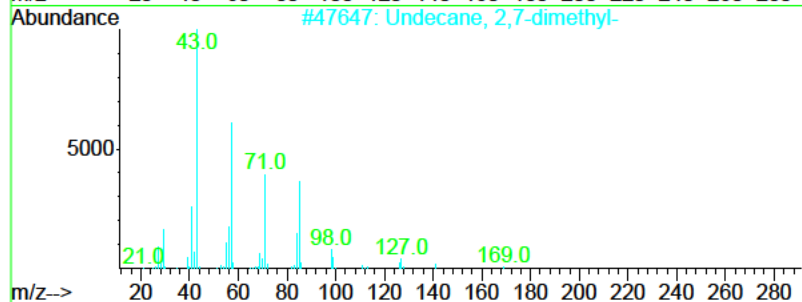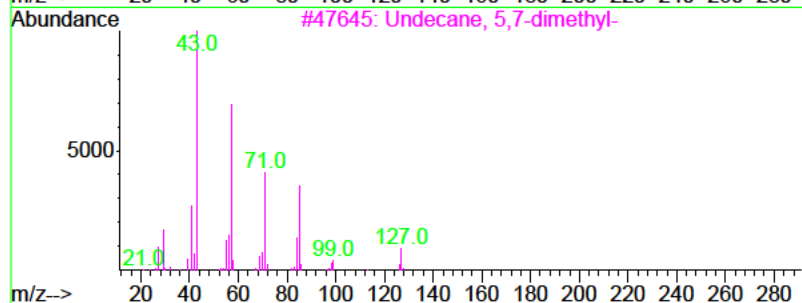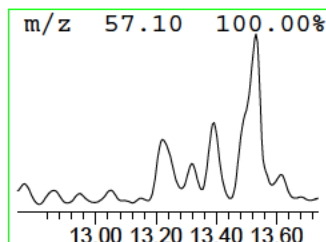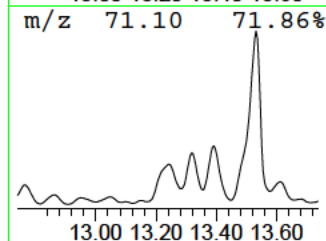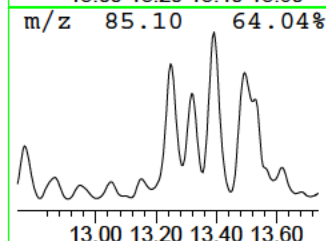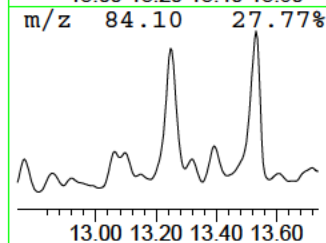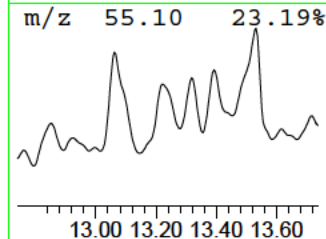

Data Path : C:\msdchem\1\LEGACY\2012\January\  
Data File : 011112PA- 8-Day2.D  
Acq On : 11 Jan 2012 9:04  
Operator :  
Sample : PA-Blaker8-Day2  
Misc : 1.0 uL PA- 8-Day2 at 1 mL dilute 1/10  
ALS Vial : 58 Sample Multiplier: 1

Quant Method : C:\msdchem\1\METHODS\TLTICPAH.M  
Quant Title : PAH5437

TIC Library : C:\Database\NIST08.L  
TIC Integration Parameters: rteint.p

\*\*\*\*\*  
Peak Number 4 Dodecane, 2-methyl- Concentration Rank 11

| R.T.   | EstConc    | Area     | Relative to ISTD  | R.T.  |
|--------|------------|----------|-------------------|-------|
| 13.392 | 3496.73 ng | 34967300 | External Standard | 0.000 |

| Hit# | of | 5 | Tentative ID                   | MW  | MolForm  | CAS#         | Qual |
|------|----|---|--------------------------------|-----|----------|--------------|------|
| 1    |    |   | Dodecane, 2-methyl-            | 184 | C13H28   | 001560-97-0  | 90   |
| 2    |    |   | Dodecane, 2-methyl-            | 184 | C13H28   | 001560-97-0  | 74   |
| 3    |    |   | Pentadecane, 2,6,10-trimethyl- | 254 | C18H38   | 003892-00-0  | 59   |
| 4    |    |   | Borane, diethyl(decyloxy)-     | 226 | C14H31BO | 1000152-34-3 | 59   |
| 5    |    |   | Undecane, 3-methyl-            | 170 | C12H26   | 001002-43-3  | 53   |

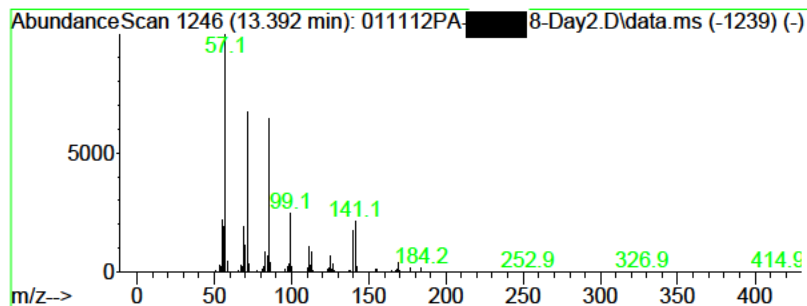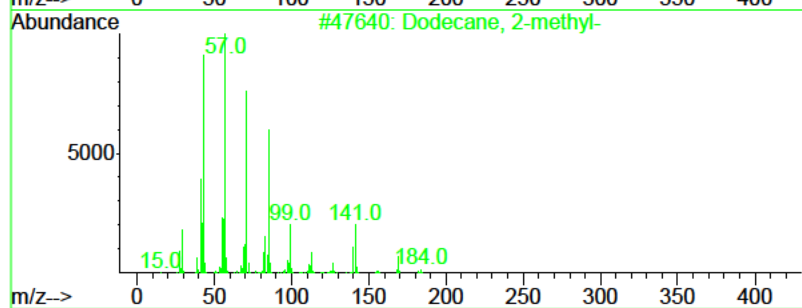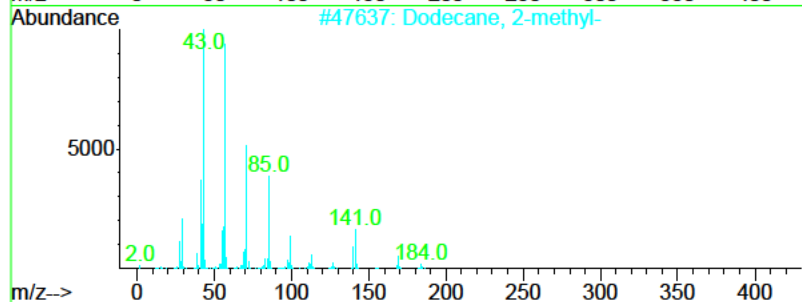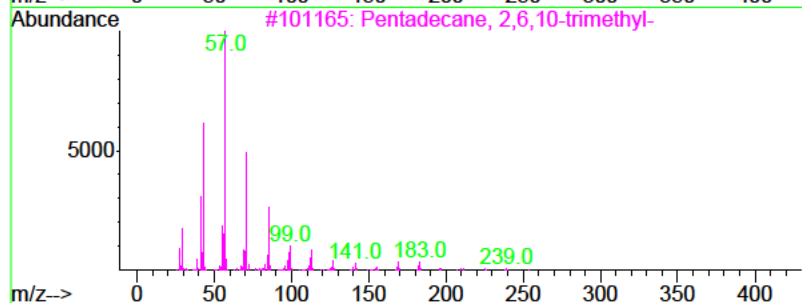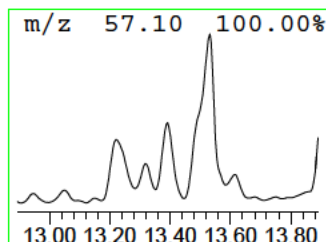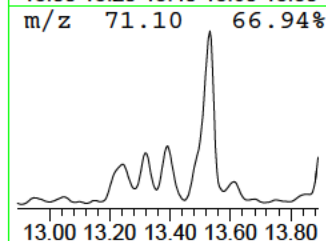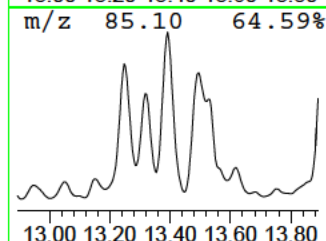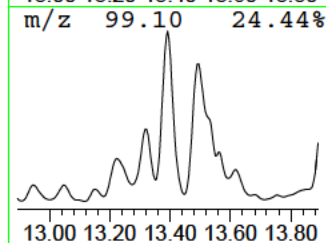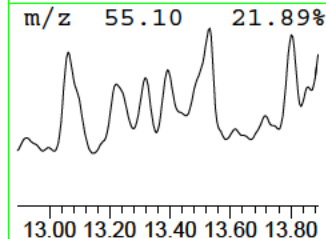

Data Path : C:\msdchem\1\LEGACY\2012\January\  
Data File : 011112PA- 8-Day2.D  
Acq On : 11 Jan 2012 9:04  
Operator :  
Sample : PA-Blaker8-Day2  
Misc : 1.0 uL PA- 8-Day2 at 1 mL dilute 1/10  
ALS Vial : 58 Sample Multiplier: 1

Quant Method : C:\msdchem\1\METHODS\TLTICPAH.M  
Quant Title : PAH5437

TIC Library : C:\Database\NIST08.L  
TIC Integration Parameters: rteint.p

\*\*\*\*\*  
Peak Number 5 Nonane, 3-methyl- Concentration Rank 5

| R.T.   | EstConc    | Area     | Relative to ISTD  | R.T.  |
|--------|------------|----------|-------------------|-------|
| 13.532 | 8317.98 ng | 83179800 | External Standard | 0.000 |

| Hit# | of | Tentative ID                        | MW  | MolForm  | CAS#         | Qual |
|------|----|-------------------------------------|-----|----------|--------------|------|
| 1    | 5  | Nonane, 3-methyl-                   | 142 | C10H22   | 005911-04-6  | 83   |
| 2    |    | Decane, 4-methyl-                   | 156 | C11H24   | 002847-72-5  | 78   |
| 3    |    | Bacchotricuneatin c                 | 342 | C20H22O5 | 066563-30-2  | 72   |
| 4    |    | Oxalic acid, decyl 2-ethylhexyl ... | 342 | C20H38O4 | 1000309-39-3 | 72   |
| 5    |    | Octane, 3,6-dimethyl-               | 142 | C10H22   | 015869-94-0  | 72   |

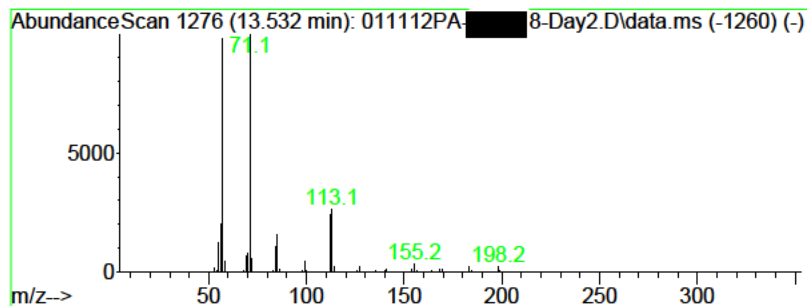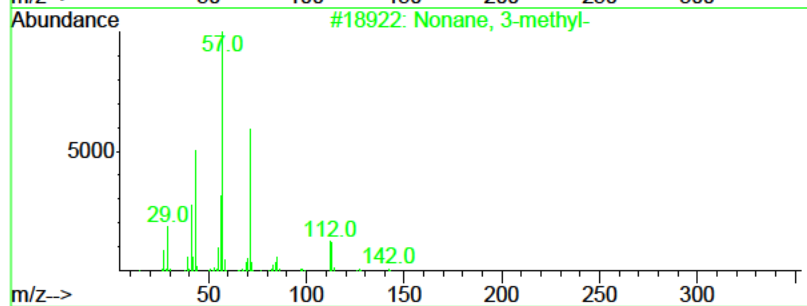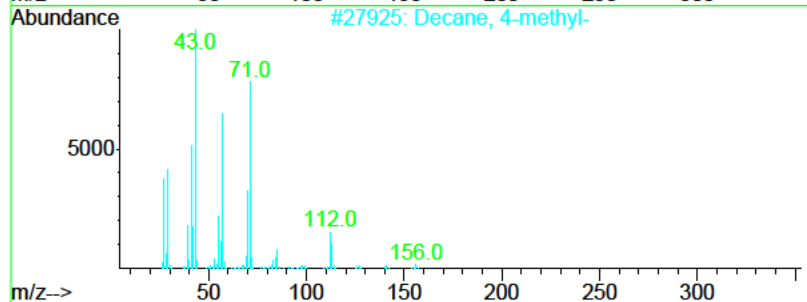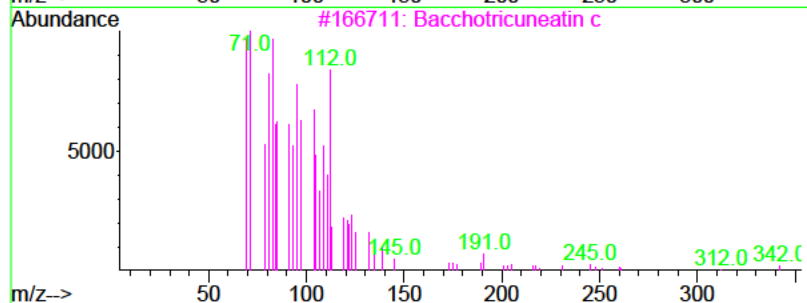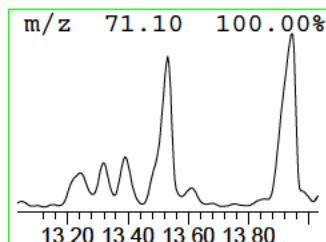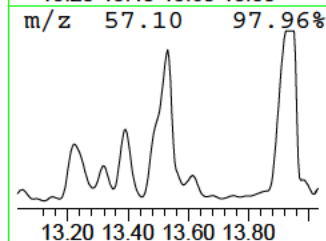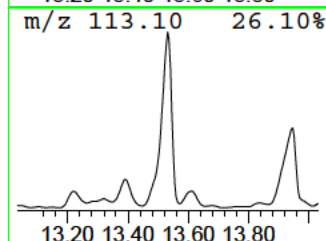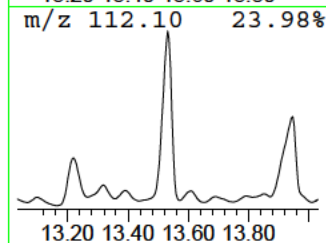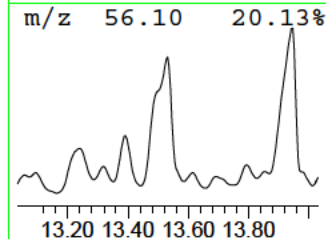



Data Path : C:\msdchem\1\LEGACY\2012\January\  
Data File : 011112PA-8-Day2.D  
Acq On : 11 Jan 2012 9:04  
Operator :  
Sample : PA-Blaker8-Day2  
Misc : 1.0 uL PA-8-Day2 at 1 mL dilute 1/10  
ALS Vial : 58 Sample Multiplier: 1

Quant Method : C:\msdchem\1\METHODS\TLTICPAH.M  
Quant Title : PAH5437

TIC Library : C:\Database\NIST08.L  
TIC Integration Parameters: rteint.p

\*\*\*\*\*  
Peak Number 6 Tridecane Concentration Rank 2

| R.T.   | EstConc     | Area      | Relative to ISTD  | R.T.  |
|--------|-------------|-----------|-------------------|-------|
| 13.946 | 14191.40 ng | 141914000 | External Standard | 0.000 |

| Hit# | of | 5 | Tentative ID             | MW  | MolForm | CAS#        | Qual |
|------|----|---|--------------------------|-----|---------|-------------|------|
| 1    |    |   | Tridecane                | 184 | C13H28  | 000629-50-5 | 91   |
| 2    |    |   | Decane, 2,3,5-trimethyl- | 184 | C13H28  | 062238-11-3 | 86   |
| 3    |    |   | Pentadecane              | 212 | C15H32  | 000629-62-9 | 80   |
| 4    |    |   | Tetradecane              | 198 | C14H30  | 000629-59-4 | 80   |
| 5    |    |   | Decane, 2,3,6-trimethyl- | 184 | C13H28  | 062238-12-4 | 72   |

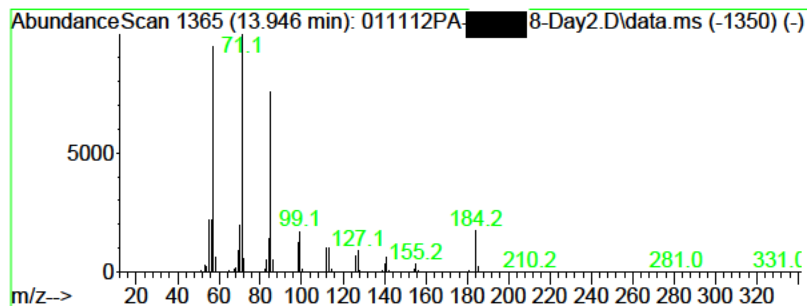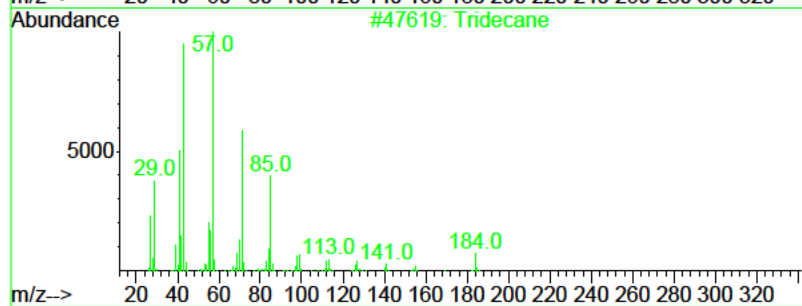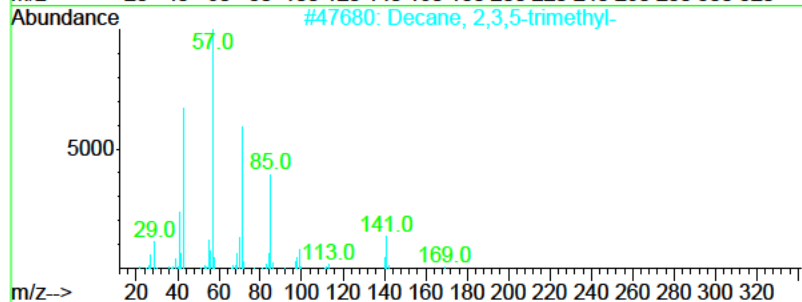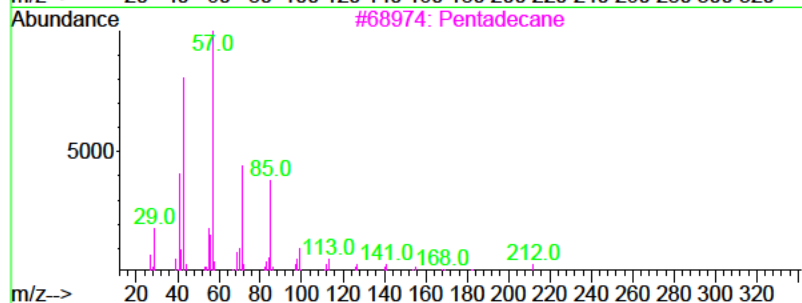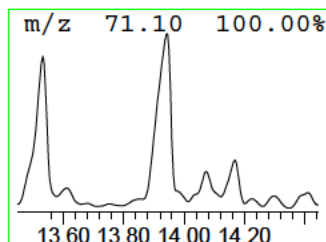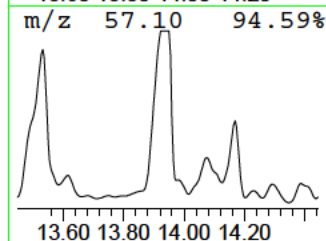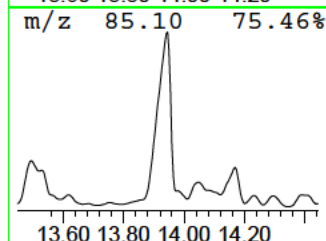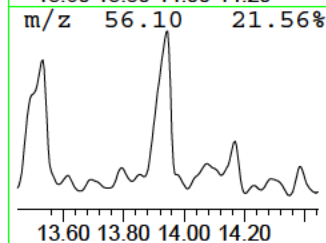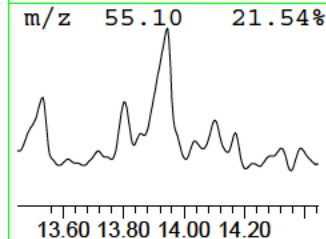



Data Path : C:\msdchem\1\LEGACY\2012\January\  
Data File : 011112PA-8-Day2.D  
Acq On : 11 Jan 2012 9:04  
Operator :  
Sample : PA-Blaker8-Day2  
Misc : 1.0 uL PA-8-Day2 at 1 mL dilute 1/10  
ALS Vial : 58 Sample Multiplier: 1

Quant Method : C:\msdchem\1\METHODS\TLTICPAH.M  
Quant Title : PAH5437

TIC Library : C:\Database\NIST08.L  
TIC Integration Parameters: rteint.p

\*\*\*\*\*  
Peak Number 7 Heptylcyclohexane Concentration Rank 12

| R.T.   | EstConc    | Area     | Relative to ISTD  | R.T.  |
|--------|------------|----------|-------------------|-------|
| 14.574 | 3009.61 ng | 30096100 | External Standard | 0.000 |

| Hit# | of | 5 | Tentative ID                   | MW  | MolForm | CAS#        | Qual |
|------|----|---|--------------------------------|-----|---------|-------------|------|
| 1    |    |   | Heptylcyclohexane              | 182 | C13H26  | 005617-41-4 | 87   |
| 2    |    |   | Heptylcyclohexane              | 182 | C13H26  | 005617-41-4 | 83   |
| 3    |    |   | Cyclohexane, (4-methylpentyl)- | 168 | C12H24  | 061142-20-9 | 80   |
| 4    |    |   | Cyclohexane, octyl-            | 196 | C14H28  | 001795-15-9 | 74   |
| 5    |    |   | Cyclohexane, hexyl-            | 168 | C12H24  | 004292-75-5 | 72   |

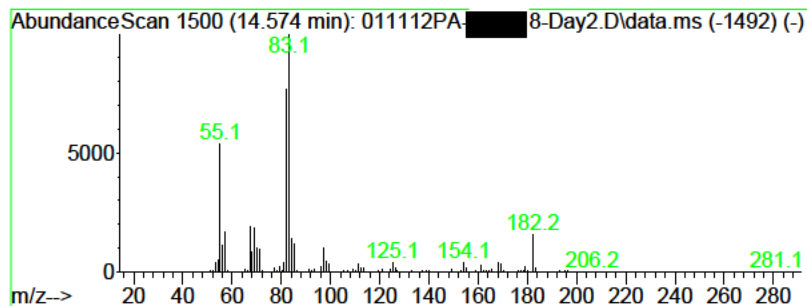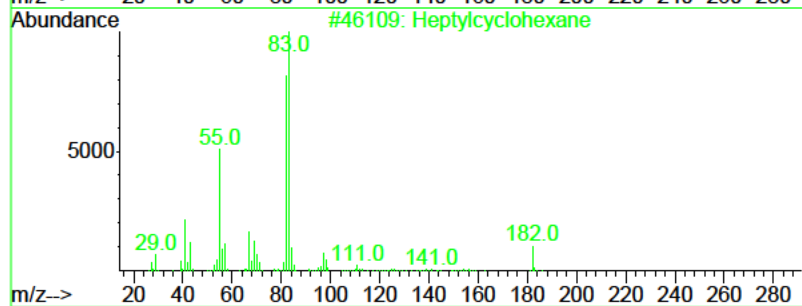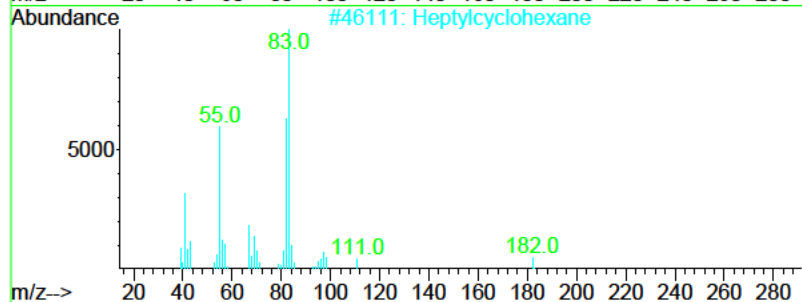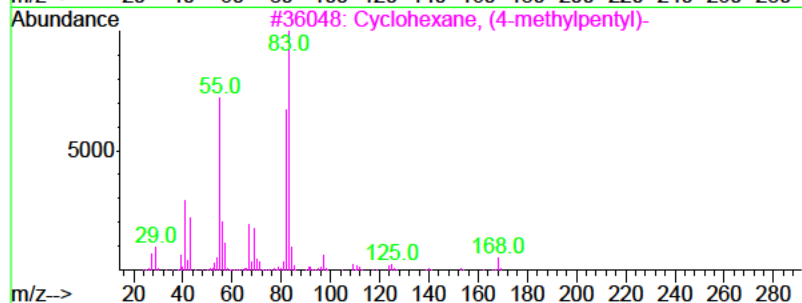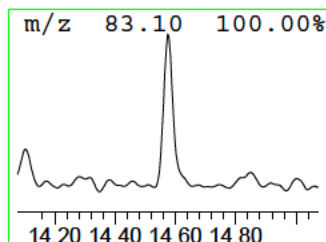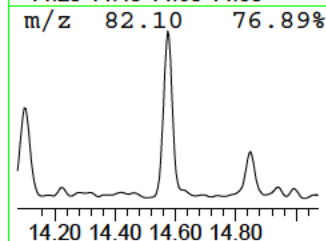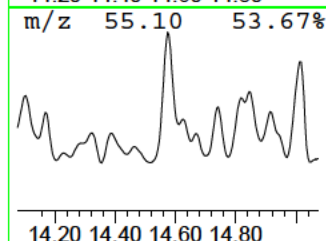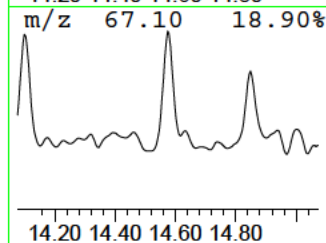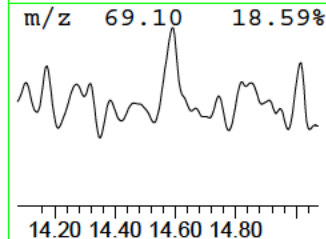

Data Path : C:\msdchem\1\LEGACY\2012\January\  
Data File : 011112PA- 8-Day2.D  
Acq On : 11 Jan 2012 9:04  
Operator :  
Sample : PA-Blaker8-Day2  
Misc : 1.0 uL PA- 8-Day2 at 1 mL dilute 1/10  
ALS Vial : 58 Sample Multiplier: 1

Quant Method : C:\msdchem\1\METHODS\TLTICPAH.M  
Quant Title : PAH5437

TIC Library : C:\Database\NIST08.L  
TIC Integration Parameters: rteint.p

\*\*\*\*\*  
Peak Number 8 Tridecane, 2-methyl- Concentration Rank 8

| R.T.   | EstConc    | Area     | Relative to ISTD  | R.T.  |
|--------|------------|----------|-------------------|-------|
| 14.816 | 4390.46 ng | 43904600 | External Standard | 0.000 |

| Hit# | of | 5 | Tentative ID            | MW  | MolForm | CAS#        | Qual |
|------|----|---|-------------------------|-----|---------|-------------|------|
| 1    |    |   | Tridecane, 2-methyl-    | 198 | C14H30  | 001560-96-9 | 81   |
| 2    |    |   | Undecane, 2,9-dimethyl- | 184 | C13H28  | 017301-26-7 | 72   |
| 3    |    |   | Tridecane, 2-methyl-    | 198 | C14H30  | 001560-96-9 | 72   |
| 4    |    |   | Eicosane, 10-methyl-    | 296 | C21H44  | 054833-23-7 | 72   |
| 5    |    |   | Heptadecane             | 240 | C17H36  | 000629-78-7 | 58   |

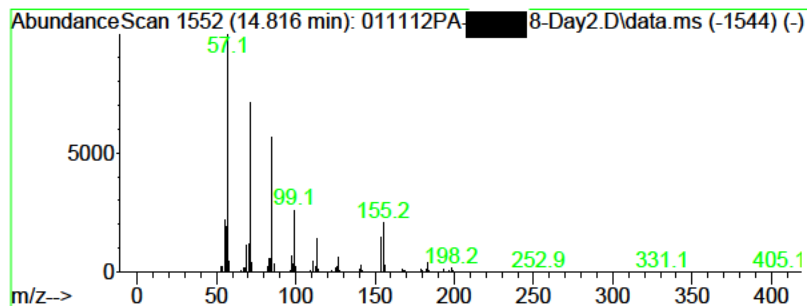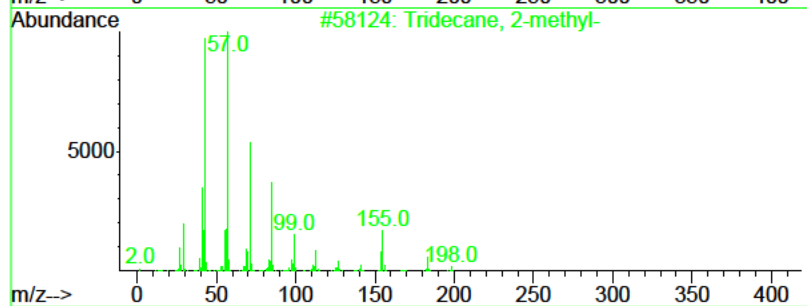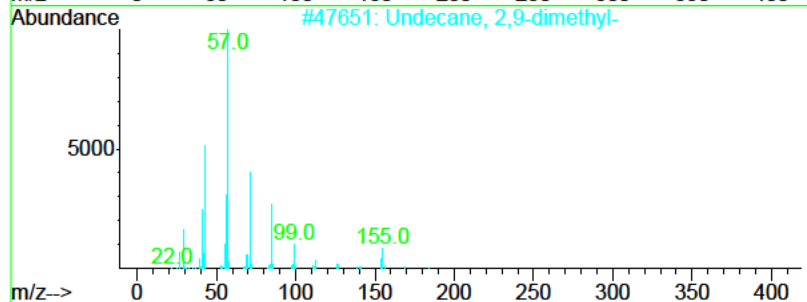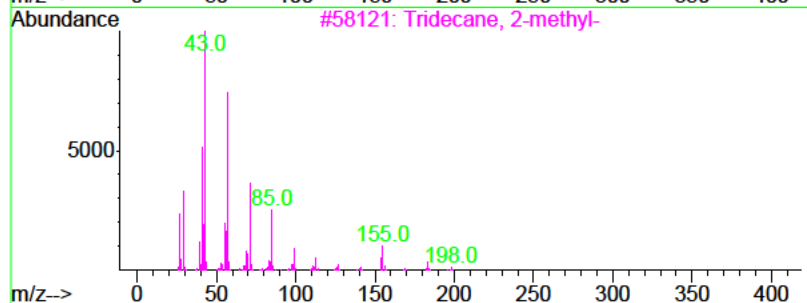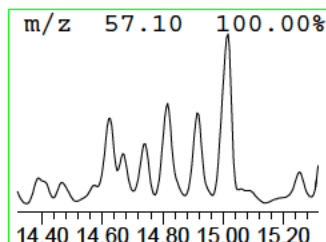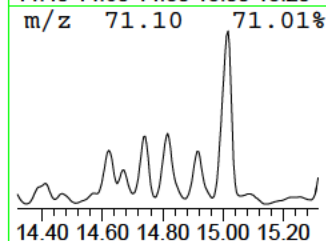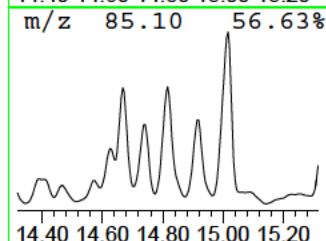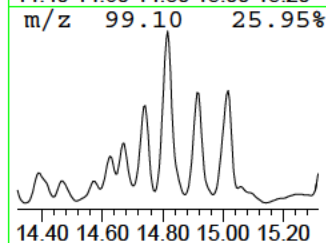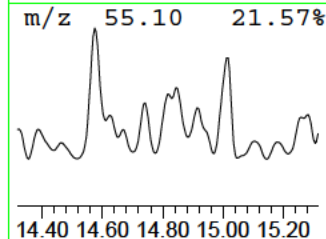

Data Path : C:\msdchem\1\LEGACY\2012\January\  
Data File : 011112PA-8-Day2.D  
Acq On : 11 Jan 2012 9:04  
Operator :  
Sample : PA-Blaker8-Day2  
Misc : 1.0 uL PA-8-Day2 at 1 mL dilute 1/10  
ALS Vial : 58 Sample Multiplier: 1

Quant Method : C:\msdchem\1\METHODS\TLTICPAH.M  
Quant Title : PAH5437

TIC Library : C:\Database\NIST08.L  
TIC Integration Parameters: rteint.p

\*\*\*\*\*  
Peak Number 9 3,5-Dimethyldodecane Concentration Rank 13

| R.T.   | EstConc    | Area     | Relative to ISTD  | R.T.  |
|--------|------------|----------|-------------------|-------|
| 14.914 | 2838.59 ng | 28385900 | External Standard | 0.000 |

| Hit# | of | 5 | Tentative ID             | MW  | MolForm  | CAS#        | Qual |
|------|----|---|--------------------------|-----|----------|-------------|------|
| 1    |    |   | 3,5-Dimethyldodecane     | 198 | C14H30   | 107770-99-0 | 83   |
| 2    |    |   | 2-Bromo dodecane         | 248 | C12H25Br | 013187-99-0 | 72   |
| 3    |    |   | 2,6-Dimethyldodecane     | 170 | C12H26   | 013150-81-7 | 64   |
| 4    |    |   | Undecane, 3,9-dimethyl-  | 184 | C13H28   | 017301-31-4 | 59   |
| 5    |    |   | Octane, 2,3,3-trimethyl- | 156 | C11H24   | 062016-30-2 | 59   |

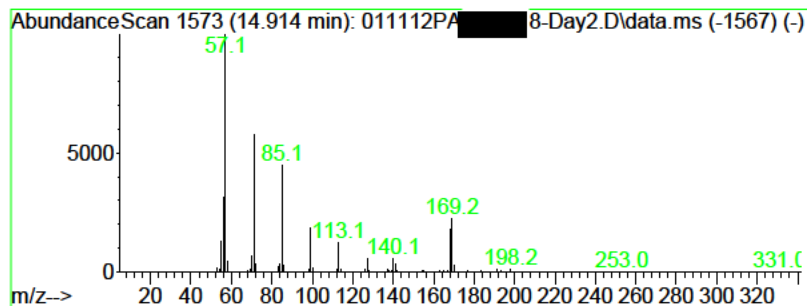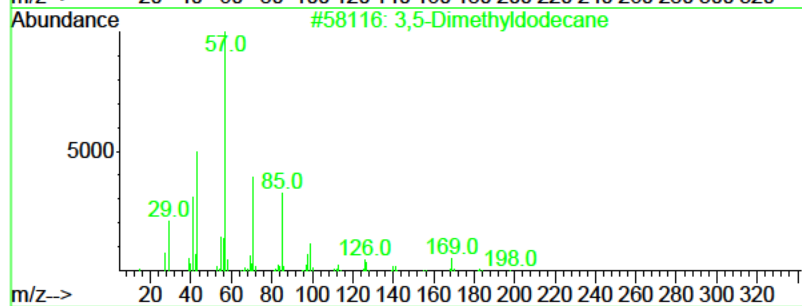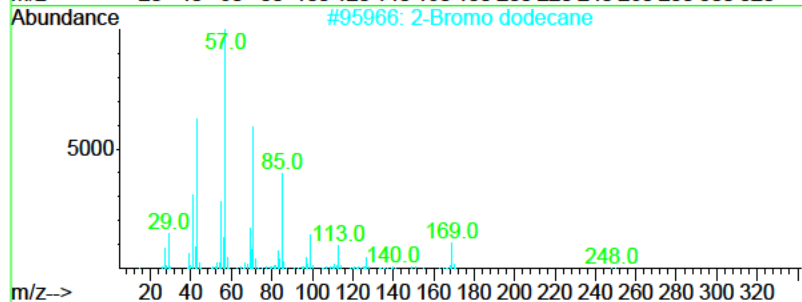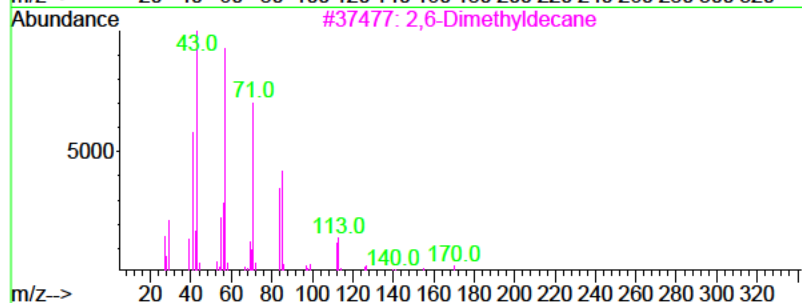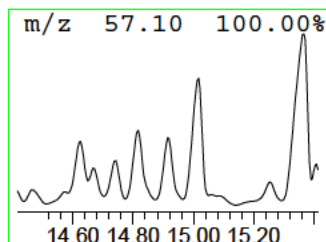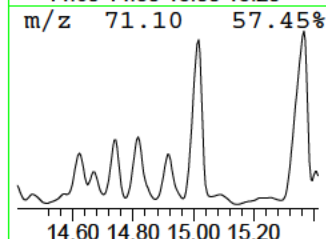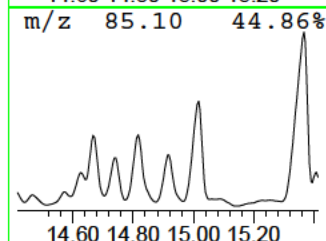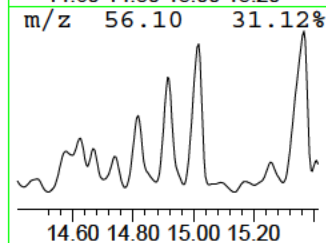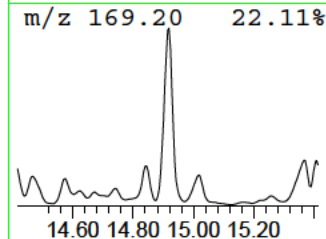

Data Path : C:\msdchem\1\LEGACY\2012\January\  
Data File : 011112PA-8-Day2.D  
Acq On : 11 Jan 2012 9:04  
Operator :  
Sample : PA-Blaker8-Day2  
Misc : 1.0 uL PA-8-Day2 at 1 mL dilute 1/10  
ALS Vial : 58 Sample Multiplier: 1

Quant Method : C:\msdchem\1\METHODS\TLTICPAH.M  
Quant Title : PAH5437

TIC Library : C:\Database\NIST08.L  
TIC Integration Parameters: rteint.p

\*\*\*\*\*  
Peak Number 10 Dodecane, 2,6,10-trimethyl- Concentration Rank 6

| R.T.   | EstConc    | Area     | Relative to ISTD  | R.T.  |
|--------|------------|----------|-------------------|-------|
| 15.017 | 5566.04 ng | 55660400 | External Standard | 0.000 |

| Hit# | of | 5 | Tentative ID                | MW  | MolForm | CAS#        | Qual |
|------|----|---|-----------------------------|-----|---------|-------------|------|
| 1    |    |   | Dodecane, 2,6,10-trimethyl- | 212 | C15H32  | 003891-98-3 | 81   |
| 2    |    |   | Dodecane, 2,6,10-trimethyl- | 212 | C15H32  | 003891-98-3 | 72   |
| 3    |    |   | Tetradecane, 4-methyl-      | 212 | C15H32  | 025117-24-2 | 72   |
| 4    |    |   | Decane, 5-propyl-           | 184 | C13H28  | 017312-62-8 | 72   |
| 5    |    |   | Dodecane, 4-methyl-         | 184 | C13H28  | 006117-97-1 | 64   |

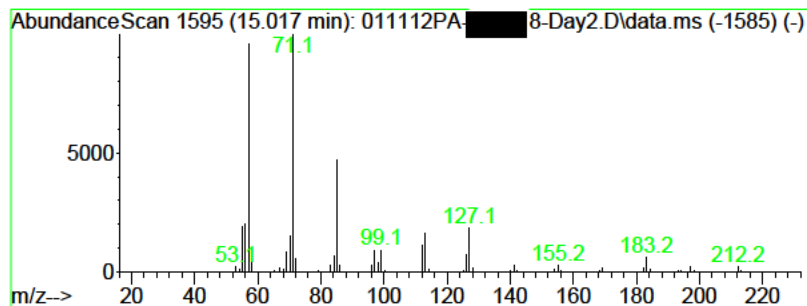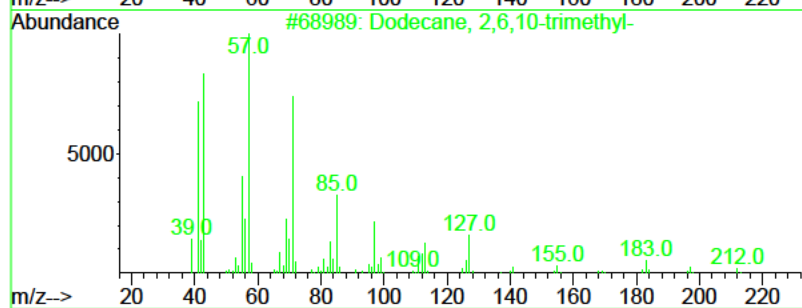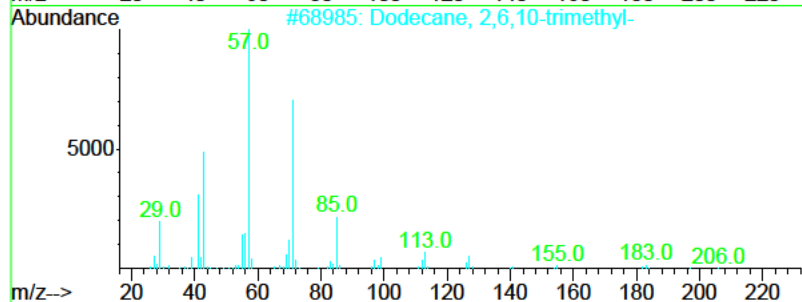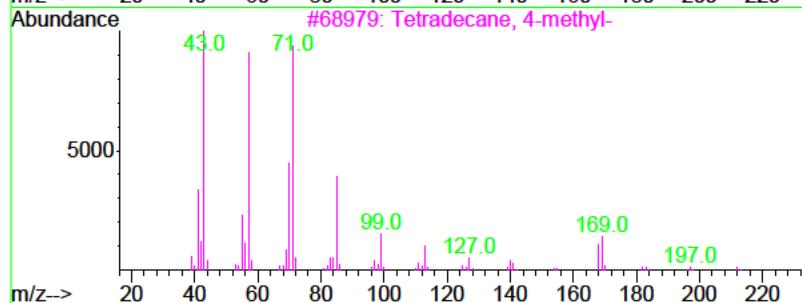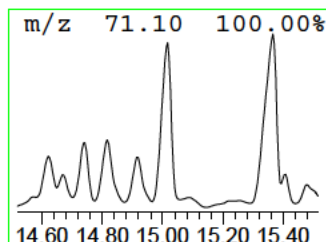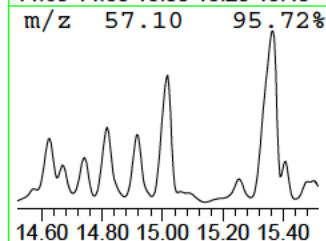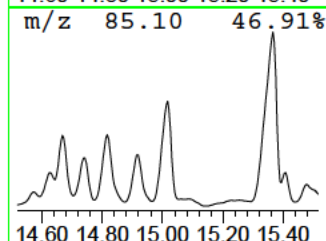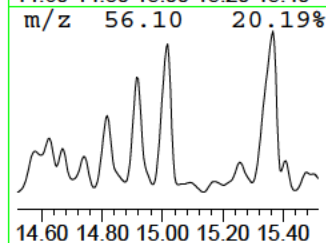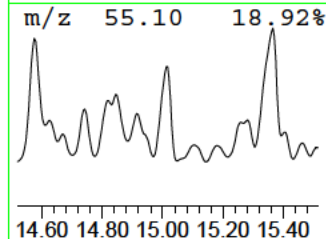

Data Path : C:\msdchem\1\LEGACY\2012\January\  
Data File : 011112PA- 8-Day2.D  
Acq On : 11 Jan 2012 9:04  
Operator :  
Sample : PA-Blaker8-Day2  
Misc : 1.0 uL PA- 8-Day2 at 1 mL dilute 1/10  
ALS Vial : 58 Sample Multiplier: 1

Quant Method : C:\msdchem\1\METHODS\TLTICPAH.M  
Quant Title : PAH5437

TIC Library : C:\Database\NIST08.L  
TIC Integration Parameters: rteint.p

\*\*\*\*\*  
Peak Number 11 Tetradecane Concentration Rank 4

| R.T.   | EstConc    | Area     | Relative to ISTD  | R.T.  |
|--------|------------|----------|-------------------|-------|
| 15.366 | 8677.02 ng | 86770200 | External Standard | 0.000 |

| Hit# | of | 5 | Tentative ID         | MW  | MolForm | CAS#        | Qual |
|------|----|---|----------------------|-----|---------|-------------|------|
| 1    |    |   | Tetradecane          | 198 | C14H30  | 000629-59-4 | 95   |
| 2    |    |   | Tetradecane          | 198 | C14H30  | 000629-59-4 | 93   |
| 3    |    |   | Tritetracontane      | 605 | C43H88  | 007098-21-7 | 86   |
| 4    |    |   | Tridecane, 3-methyl- | 198 | C14H30  | 006418-41-3 | 80   |
| 5    |    |   | Heptadecane          | 240 | C17H36  | 000629-78-7 | 80   |

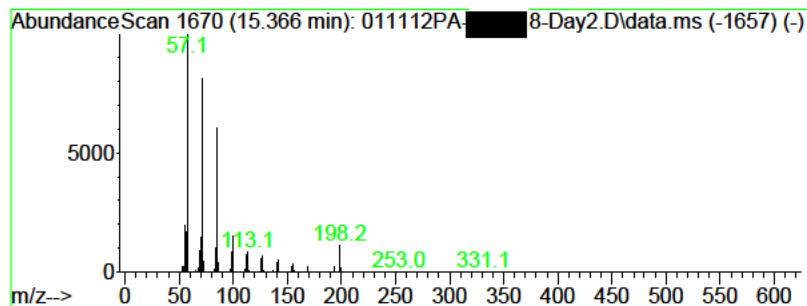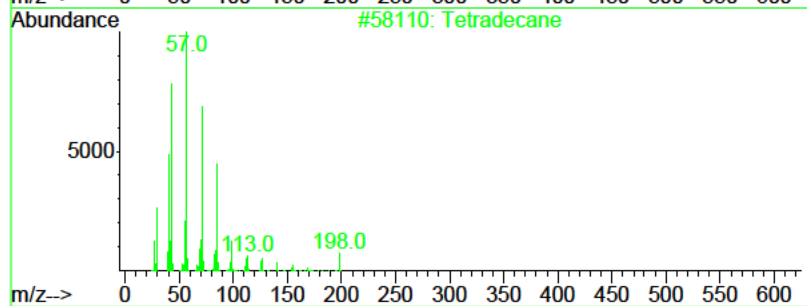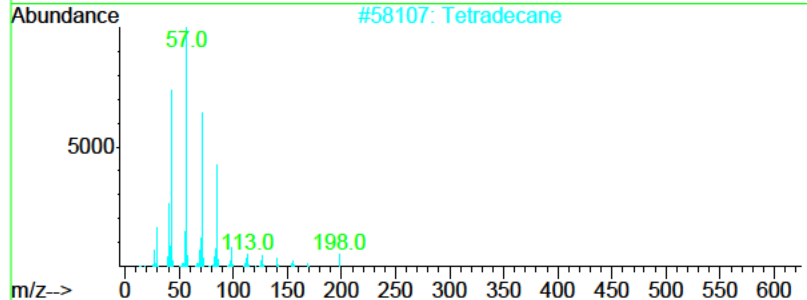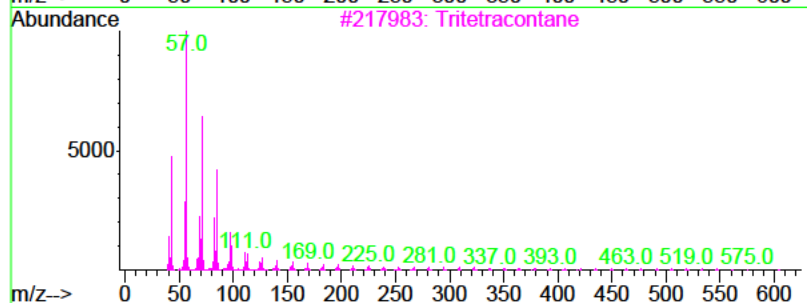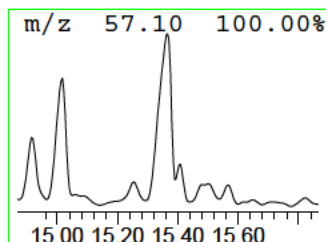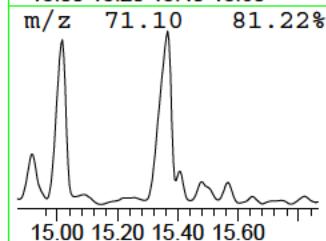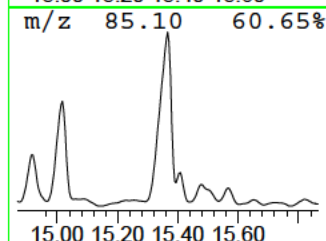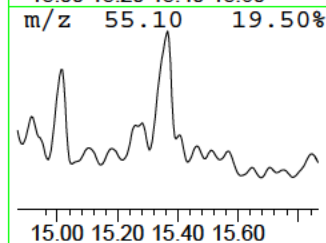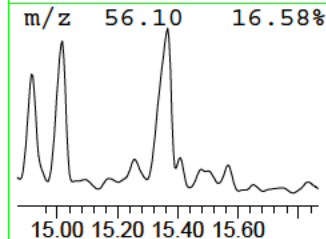

Data Path : C:\msdchem\1\LEGACY\2012\January\  
Data File : 011112PA-8-Day2.D  
Acq On : 11 Jan 2012 9:04  
Operator :  
Sample : PA-Blaker8-Day2  
Misc : 1.0 uL PA-8-Day2 at 1 mL dilute 1/10  
ALS Vial : 58 Sample Multiplier: 1

Quant Method : C:\msdchem\1\METHODS\TLTICPAH.M  
Quant Title : PAH5437

TIC Library : C:\Database\NIST08.L  
TIC Integration Parameters: rteint.p

\*\*\*\*\*  
Peak Number 12 Tridecane Concentration Rank 7

| R.T.   | EstConc    | Area     | Relative to ISTD  | R.T.  |
|--------|------------|----------|-------------------|-------|
| 16.269 | 5206.60 ng | 52066000 | External Standard | 0.000 |

| Hit# | of | 5 | Tentative ID            | MW  | MolForm | CAS#        | Qual |
|------|----|---|-------------------------|-----|---------|-------------|------|
| 1    |    |   | Tridecane               | 184 | C13H28  | 000629-50-5 | 91   |
| 2    |    |   | Hexadecane              | 226 | C16H34  | 000544-76-3 | 90   |
| 3    |    |   | Decane, 2-methyl-       | 156 | C11H24  | 006975-98-0 | 90   |
| 4    |    |   | Pentadecane, 4-methyl-  | 226 | C16H34  | 002801-87-8 | 81   |
| 5    |    |   | Dodecane, 4,6-dimethyl- | 198 | C14H30  | 061141-72-8 | 76   |

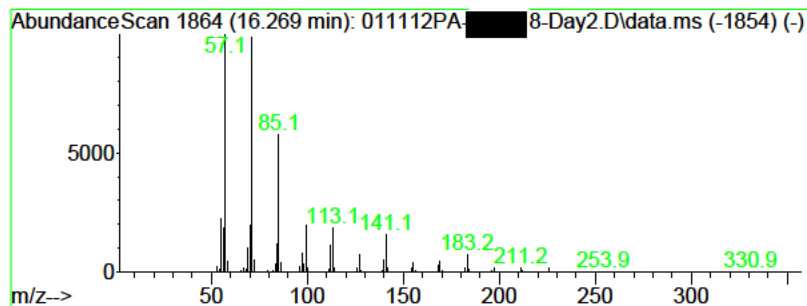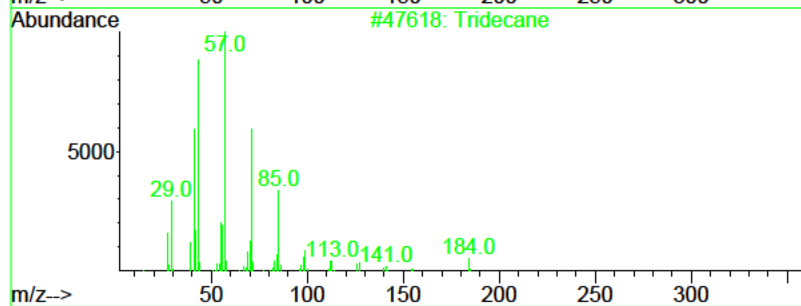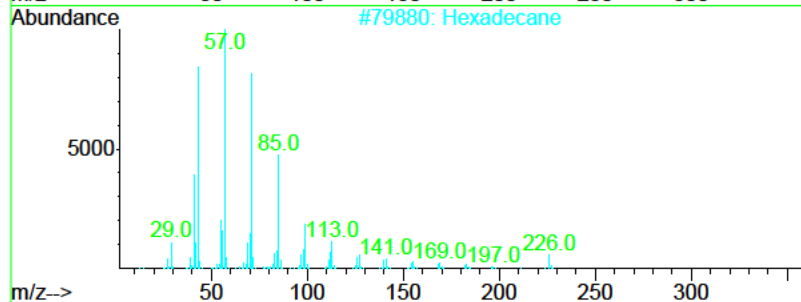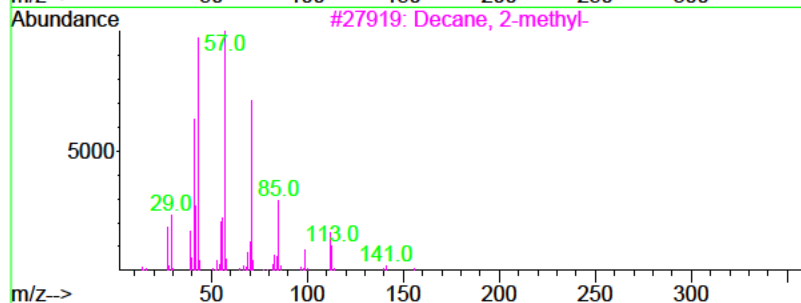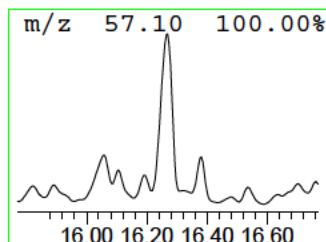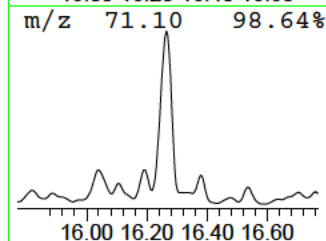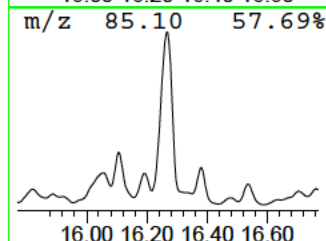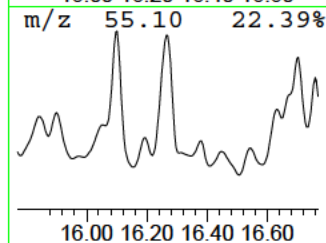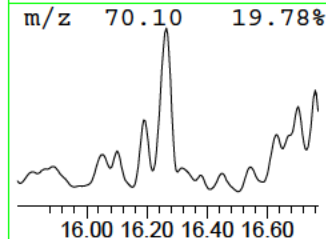



Data Path : C:\msdchem\1\LEGACY\2012\January\  
Data File : 011112PA-8-Day2.D  
Acq On : 11 Jan 2012 9:04  
Operator :  
Sample : PA-Blaker8-Day2  
Misc : 1.0 uL PA-8-Day2 at 1 mL dilute 1/10  
ALS Vial : 58 Sample Multiplier: 1

Quant Method : C:\msdchem\1\METHODS\TLTICPAH.M  
Quant Title : PAH5437

TIC Library : C:\Database\NIST08.L  
TIC Integration Parameters: rteint.p

\*\*\*\*\*  
Peak Number 13 7-Hexadecene, (Z)- Concentration Rank 14

| R.T.   | EstConc    | Area     | Relative to ISTD  | R.T.  |
|--------|------------|----------|-------------------|-------|
| 18.452 | 2789.46 ng | 27894600 | External Standard | 0.000 |

| Hit# | of | 5 | Tentative ID                    | MW  | MolForm    | CAS#         | Qual |
|------|----|---|---------------------------------|-----|------------|--------------|------|
| 1    |    |   | 7-Hexadecene, (Z)-              | 224 | C16H32     | 035507-09-6  | 99   |
| 2    |    |   | 2-Tetradecene, (E)-             | 196 | C14H28     | 035953-53-8  | 97   |
| 3    |    |   | 4-Heptafluorobutyloxyhexadecane | 438 | C20H33F7O2 | 1000282-97-2 | 91   |
| 4    |    |   | Cyclohexadecane                 | 224 | C16H32     | 000295-65-8  | 91   |
| 5    |    |   | Hexadecen-1-ol, trans-9-        | 240 | C16H32O    | 064437-47-4  | 91   |

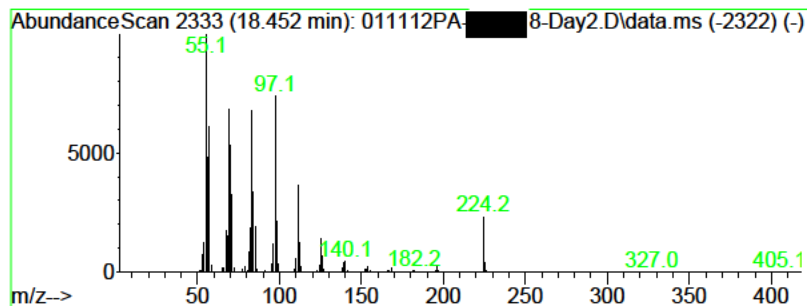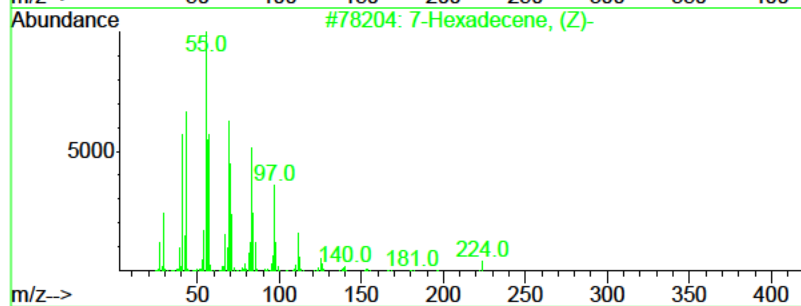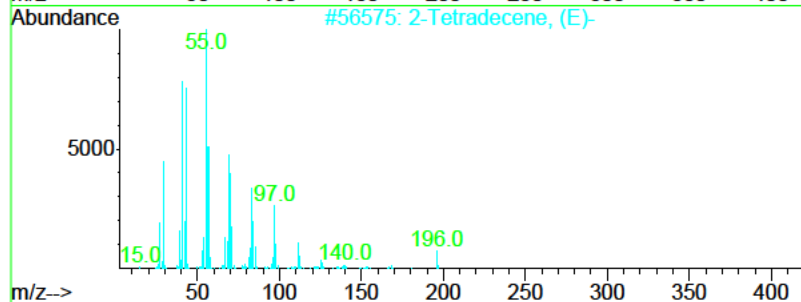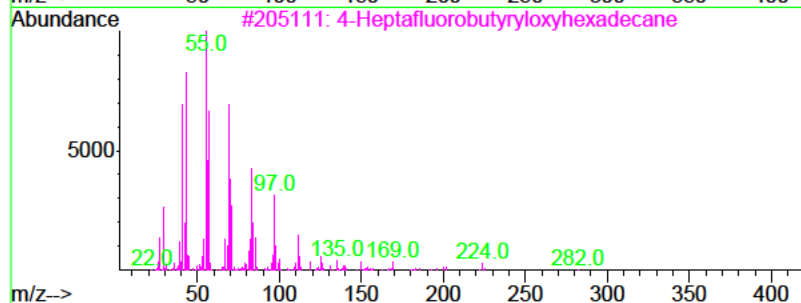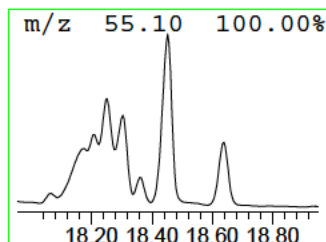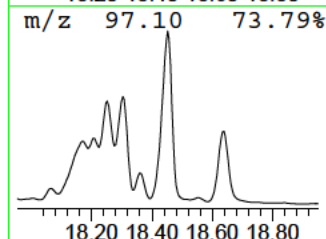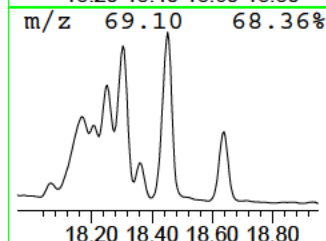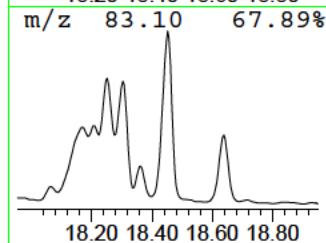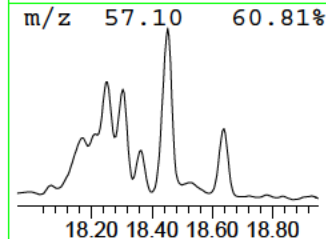



Data Path : C:\msdchem\1\LEGACY\2012\January\  
Data File : 011112PA- 8-Day2.D  
Acq On : 11 Jan 2012 9:04  
Operator :  
Sample : PA-Blaker8-Day2  
Misc : 1.0 uL PA- 8-Day2 at 1 mL dilute 1/10  
ALS Vial : 58 Sample Multiplier: 1

Quant Method : C:\msdchem\1\METHODS\TLTICPAH.M  
Quant Title : PAH5437

TIC Library : C:\Database\NIST08.L  
TIC Integration Parameters: rteint.p

\*\*\*\*\*  
Peak Number 14 8-Heptadecene Concentration Rank 15

| R.T.   | EstConc    | Area     | Relative to ISTD  | R.T.  |
|--------|------------|----------|-------------------|-------|
| 20.049 | 2754.97 ng | 27549700 | External Standard | 0.000 |

| Hit# | of | Tentative ID                        | MW  | MolForm    | CAS#         | Qual |
|------|----|-------------------------------------|-----|------------|--------------|------|
| 1    | 5  | 8-Heptadecene                       | 238 | C17H34     | 002579-04-6  | 99   |
| 2    |    | 3-Heptadecene, (Z)-                 | 238 | C17H34     | 1000141-67-3 | 94   |
| 3    |    | 1-Heptadecene                       | 238 | C17H34     | 006765-39-5  | 94   |
| 4    |    | Pentafluoropropionic acid, tetra... | 360 | C17H29F5O2 | 006222-06-6  | 94   |
| 5    |    | 8-Heptadecene                       | 238 | C17H34     | 002579-04-6  | 93   |

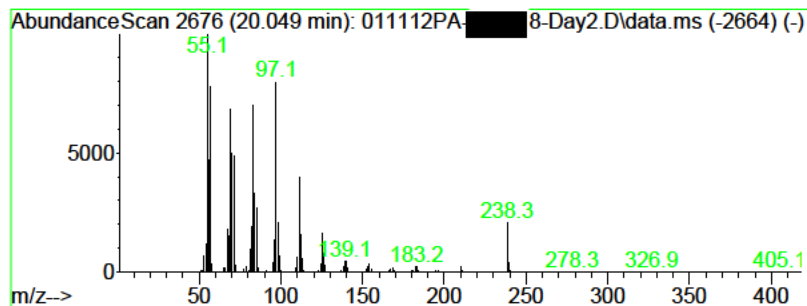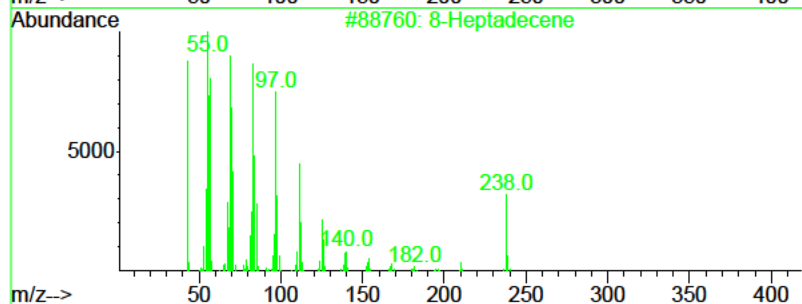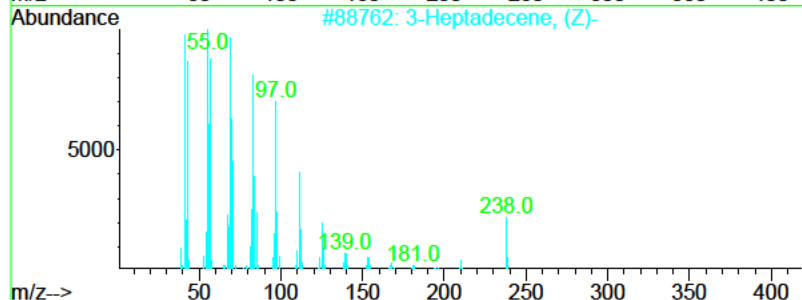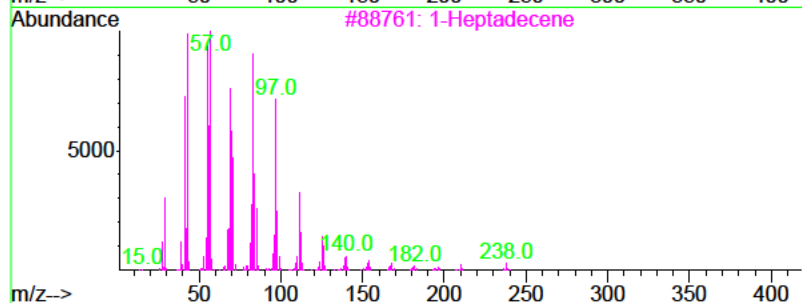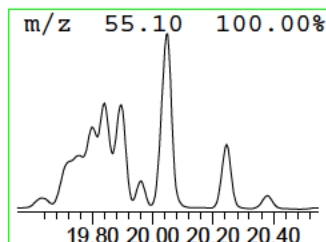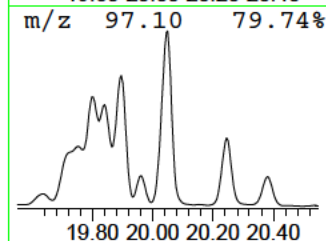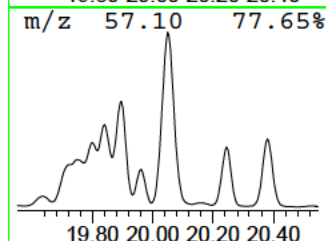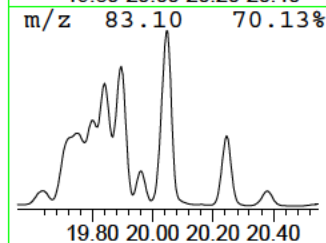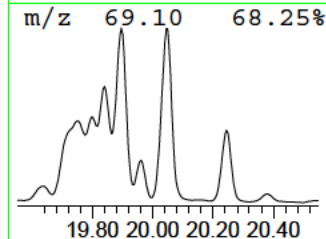

Data Path : C:\msdchem\1\LEGACY\2012\January\  
Data File : 011112PA-8-Day2.D  
Acq On : 11 Jan 2012 9:04  
Operator :  
Sample : PA-Blaker8-Day2  
Misc : 1.0 uL PA-8-Day2 at 1 mL dilute 1/10  
ALS Vial : 58 Sample Multiplier: 1

Quant Method : C:\msdchem\1\METHODS\TLTICPAH.M  
Quant Title : PAH5437

TIC Library : C:\Database\NIST08.L  
TIC Integration Parameters: rteint.p

\*\*\*\*\*  
Peak Number 15 1,2-Benzenedicarboxylic aci... Concentration Rank 1

| R.T.   | EstConc     | Area      | Relative to ISTD  | R.T.  |
|--------|-------------|-----------|-------------------|-------|
| 33.778 | 86436.80 ng | 864368000 | External Standard | 0.000 |

| Hit# | of | 5 | Tentative ID                        | MW  | MolForm  | CAS#        | Qual |
|------|----|---|-------------------------------------|-----|----------|-------------|------|
| 1    |    |   | 1,2-Benzenedicarboxylic acid, di... | 390 | C24H38O4 | 027554-26-3 | 70   |
| 2    |    |   | Bis(2-ethylhexyl) phthalate         | 390 | C24H38O4 | 000117-81-7 | 62   |
| 3    |    |   | 1,2-Benzenedicarboxylic acid, mo... | 278 | C16H22O4 | 004376-20-9 | 62   |
| 4    |    |   | Di-n-octyl phthalate                | 390 | C24H38O4 | 000117-84-0 | 58   |
| 5    |    |   | Bis(2-ethylhexyl) phthalate         | 390 | C24H38O4 | 000117-81-7 | 58   |

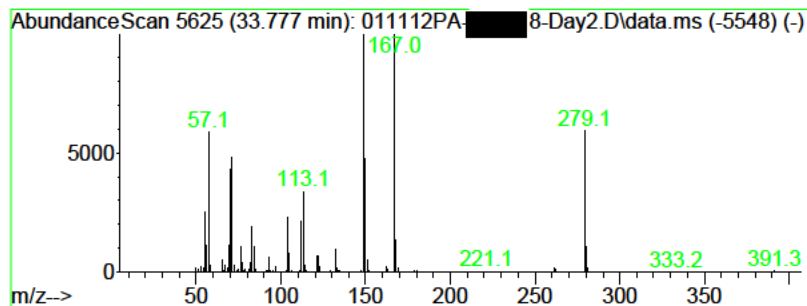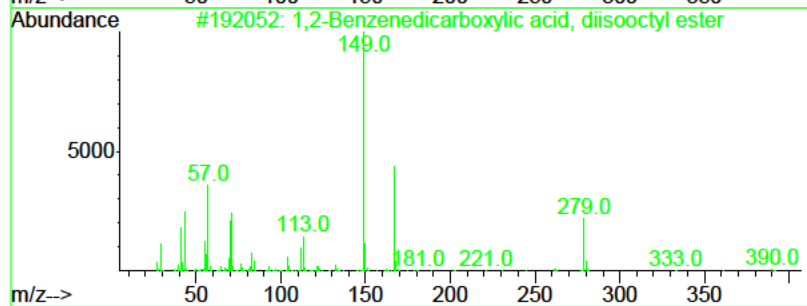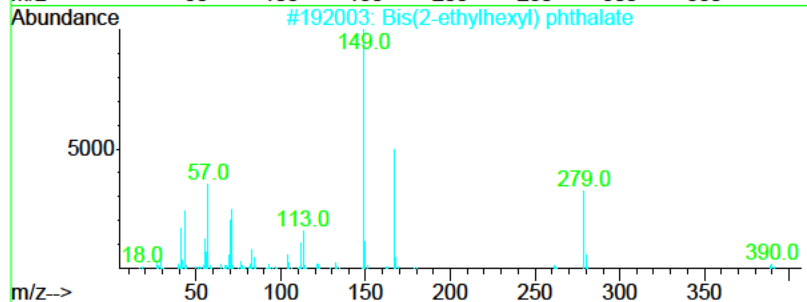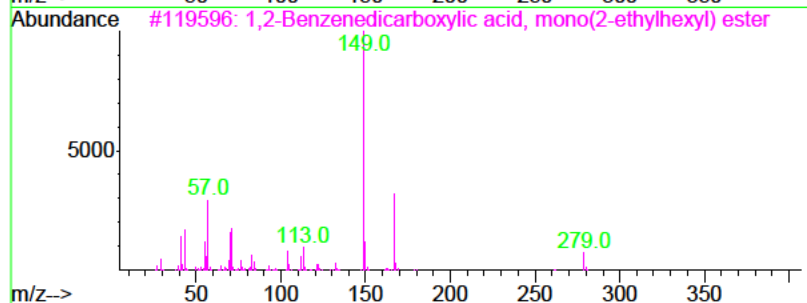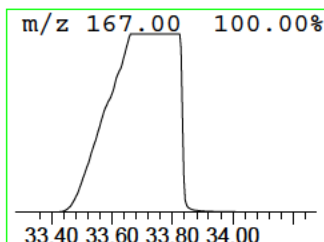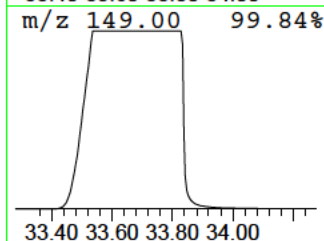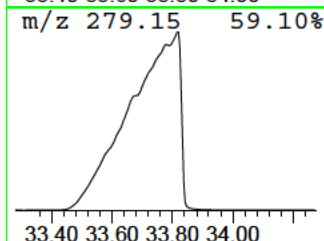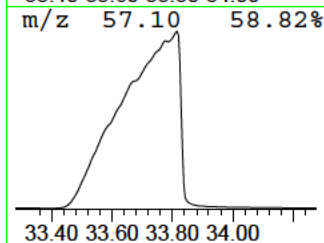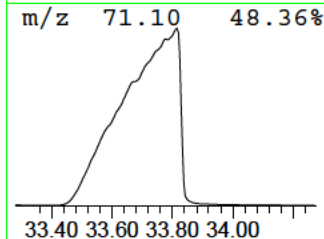

Data Path : C:\msdchem\1\LEGACY\2012\January\  
 Data File : 011112PA-8-Day2.D  
 Acq On : 11 Jan 2012 9:04  
 Operator :  
 Sample : PA-Blaker8-Day2  
 Misc : 1.0 uL PA-8-Day2 at 1 mL dilute 1/10  
 ALS Vial : 58 Sample Multiplier: 1

Quant Method : C:\msdchem\1\METHODS\TLTICPAH.M  
 Quant Title : PAH5437

TIC Library : C:\Database\NIST08.L  
 TIC Integration Parameters: rteint.p

| TIC Top Hit name   | RT     | EstConc | Units | Response  | --Internal Standard-- |       |       |      |
|--------------------|--------|---------|-------|-----------|-----------------------|-------|-------|------|
|                    |        |         |       |           | #                     | RT    | Resp  | Conc |
| Dodecane           | 12.447 | 10917.7 | ng    | 109177000 | 0                     | 0.000 | 10000 | 1.0  |
| Undecane, 2,6-d... | 12.647 | 3536.5  | ng    | 35364600  | 0                     | 0.000 | 10000 | 1.0  |
| Dodecane, 5-met... | 13.238 | 3610.8  | ng    | 36108300  | 0                     | 0.000 | 10000 | 1.0  |
| Dodecane, 2-met... | 13.392 | 3496.7  | ng    | 34967300  | 0                     | 0.000 | 10000 | 1.0  |
| Nonane, 3-methyl-  | 13.532 | 8318.0  | ng    | 83179800  | 0                     | 0.000 | 10000 | 1.0  |
| Tridecane          | 13.946 | 14191.4 | ng    | 141914000 | 0                     | 0.000 | 10000 | 1.0  |
| Heptylcyclohexane  | 14.574 | 3009.6  | ng    | 30096100  | 0                     | 0.000 | 10000 | 1.0  |
| Tridecane, 2-me... | 14.816 | 4390.5  | ng    | 43904600  | 0                     | 0.000 | 10000 | 1.0  |
| 3,5-Dimethyldod... | 14.914 | 2838.6  | ng    | 28385900  | 0                     | 0.000 | 10000 | 1.0  |
| Dodecane, 2,6,1... | 15.017 | 5566.0  | ng    | 55660400  | 0                     | 0.000 | 10000 | 1.0  |
| Tetradecane        | 15.366 | 8677.0  | ng    | 86770200  | 0                     | 0.000 | 10000 | 1.0  |
| Tridecane          | 16.269 | 5206.6  | ng    | 52066000  | 0                     | 0.000 | 10000 | 1.0  |
| 7-Hexadecene, (Z)- | 18.452 | 2789.5  | ng    | 27894600  | 0                     | 0.000 | 10000 | 1.0  |
| 8-Heptadecene      | 20.049 | 2755.0  | ng    | 27549700  | 0                     | 0.000 | 10000 | 1.0  |
| 1,2-Benzenedica... | 33.778 | 86436.8 | ng    | 864368000 | 0                     | 0.000 | 10000 | 1.0  |
