# Supplementary material
Source: publisher figshare collection journal article supplement (https://wiley.figshare.com/articles/dataset/_/6176210)
Supplement: Supplementary file 10 [file 1]

# Rat Hepatocytes RNA extraction (4hrs tox)

09/16/13

| Sample                           | Tube #   | Spec Read   | Notes |
|----------------------------------|----------|-------------|-------|
| 1-1 well 1   HFX4   Plate 1      | RHFX1-1A | 100.8 ng/ul |       |
| 1-1 well 1   HFX4   Plate 1      | RHFX1-1B | 123.4 ng/ul |       |
| 1-2 well 2   HFX4   Plate 1      | RHFX1-2A | 88.4 ng/ul  |       |
| 1-2 well 2   HFX4   Plate 1      | RHFX1-2B | 138.3 ng/ul |       |
| 1-3 well 3   HFX4   Plate 1      | RHFX1-3A | 85.7 ng/ul  |       |
| 1-3 well 3   HFX4   Plate 1      | RHFX1-3B | 62.4 ng/ul  |       |
| 1-4 well 4   HFX4   Plate 1      | RHFX1-4A | 26.8 ng/ul  |       |
| 1-4 well 4   HFX4   Plate 1      | RHFX1-4B | 64.4 ng/ul  |       |
| 1-5 well 5   HFX7   Plate 1      | RHFX1-5A | 51.5 ng/ul  |       |
| 1-5 well 5   HFX7   Plate 1      | RHFX1-5B | 85.8 ng/ul  |       |
| 1-6 well 6   HFX7   Plate 1      | RHFX1-6A | 98.1 ng/ul  |       |
| 1-6 well 6   HFX7   Plate 1      | RHFX1-6B | 68.2 ng/ul  |       |
| 2-1 well 1   + control   Plate 2 | RHFX2-1A | 21.6 ng/ul  |       |
| 2-1 well 1   + control   Plate 2 | RHFX2-1B | 30.3 ng/ul  |       |
| 2-2 well 2   + control   Plate 2 | RHFX2-2A | 37.3 ng/ul  |       |
| 2-2 well 2   + control   Plate 2 | RHFX2-2B | 38.0 ng/ul  |       |
| 2-3 well 3   + control   Plate 3 | RHFX2-3A | 35.4 ng/ul  |       |
| 2-3 well 3   + control   Plate 3 | RHFX2-3B | 40.0 ng/ul  |       |

RT qPCR HFX with Rat Hepatocytes 4hr tox - Rat cell junction pathway finder  
(Perm-2132A)

RHFX1-1B Plate 1, well 1 HFX4

$$\frac{0.5 \text{ ng} \times 1 \mu\text{L}}{123.4 \text{ ng}} = 0.85$$
