# Supplementary material
Source: publisher figshare collection journal article supplement (https://wiley.figshare.com/articles/dataset/_/6176210)
Supplement: Supplementary file 11 [file 1]

Data Path : C:\msdchem\1\LEGACY\2012\January\  
 Data File : 011012PA-8-Day1.D  
 Acq On : 10 Jan 2012 9:40  
 Operator :  
 Sample : PA-8-Day1  
 Misc : 1.0 uL PA-8-Day1 at 1 mL  
 ALS Vial : 54 Sample Multiplier: 1

## Integration Parameters: rteint.p

Integrator: RTE  
 Smoothing : ON  
 Sampling : 1  
 Start Thrs: 0.2  
 Stop Thrs : 0

Filtering: 5  
 Min Area: 3 % of largest Peak  
 Max Peaks: 100  
 Peak Location: TOP

If leading or trailing edge < 100 prefer < Baseline drop else tangent >  
 Peak separation: 5

Method : C:\msdchem\1\METHODS\TLTICPAH.M  
 Title : PAH5437

Signal : TIC: 011012PA-8-Day1.D\data.ms

| peak<br># | R.T.<br>min | first<br>scan | max<br>scan | last<br>scan | PK<br>TY | peak<br>height | corr.<br>area | corr.<br>% max. | % of<br>total |
|-----------|-------------|---------------|-------------|--------------|----------|----------------|---------------|-----------------|---------------|
| 1         | 9.598       | 417           | 431         | 454          | rBV      | 10014780       | 29177393      | 9.01%           | 3.752%        |
| 2         | 9.807       | 458           | 476         | 517          | rVB      | 2645587        | 14054121      | 4.34%           | 1.807%        |
| 3         | 12.410      | 1027          | 1035        | 1063         | rBV      | 6808847        | 19286111      | 5.96%           | 2.480%        |
| 4         | 12.629      | 1074          | 1082        | 1093         | rBV      | 5166008        | 11156330      | 3.45%           | 1.435%        |
| 5         | 13.201      | 1198          | 1205        | 1217         | rVV4     | 3058039        | 10769844      | 3.33%           | 1.385%        |
| 6         | 13.369      | 1234          | 1241        | 1253         | rVV2     | 5256978        | 11712202      | 3.62%           | 1.506%        |
| 7         | 13.499      | 1255          | 1269        | 1282         | rVB2     | 12070192       | 33209937      | 10.26%          | 4.271%        |
| 8         | 13.890      | 1345          | 1353        | 1361         | rVB      | 14034858       | 26075256      | 8.06%           | 3.353%        |
| 9         | 14.146      | 1402          | 1408        | 1415         | rVB      | 5075003        | 10081026      | 3.11%           | 1.296%        |
| 10        | 14.556      | 1487          | 1496        | 1501         | rBV2     | 6455039        | 14924810      | 4.61%           | 1.919%        |
| 11        | 14.793      | 1539          | 1547        | 1561         | rBV2     | 8367968        | 24778602      | 7.65%           | 3.186%        |
| 12        | 14.896      | 1562          | 1569        | 1580         | rVB      | 6269358        | 14519395      | 4.49%           | 1.867%        |
| 13        | 14.989      | 1580          | 1589        | 1597         | rBV      | 17001498       | 32768881      | 10.12%          | 4.214%        |
| 14        | 15.319      | 1653          | 1660        | 1667         | rBV      | 9692034        | 18658068      | 5.76%           | 2.399%        |
| 15        | 15.878      | 1774          | 1780        | 1796         | rVB2     | 4140599        | 9759129       | 3.01%           | 1.255%        |
| 16        | 16.087      | 1820          | 1825        | 1837         | rVB3     | 6604896        | 14165692      | 4.38%           | 1.822%        |
| 17        | 16.250      | 1850          | 1860        | 1879         | rVV2     | 15381914       | 38865889      | 12.01%          | 4.998%        |
| 18        | 18.336      | 2244          | 2308        | 2321         | rBV2     | 32453500       | 323695728     | 100.00%         | 41.626%       |
| 19        | 25.547      | 3840          | 3857        | 3875         | rVB      | 5012409        | 17099757      | 5.28%           | 2.199%        |
| 20        | 29.001      | 4577          | 4599        | 4712         | rVB8     | 841329         | 11878230      | 3.67%           | 1.527%        |
| 21        | 33.773      | 5594          | 5624        | 5743         | rBV9     | 813573         | 14624431      | 4.52%           | 1.881%        |
| 22        | 37.148      | 6316          | 6349        | 6484         | rBV3     | 1858327        | 40455957      | 12.50%          | 5.202%        |
| 23        | 39.075      | 6728          | 6763        | 6899         | rBV8     | 743577         | 15794734      | 4.88%           | 2.031%        |
| 24        | 42.660      | 7495          | 7533        | 7540         | rBV7     | 2203802        | 20115808      | 6.21%           | 2.587%        |

Sum of corrected areas: 777627331

Data Path : C:\msdchem\1\LEGACY\2012\January\  
Data File : 011012PA- [REDACTED] 8-Day1.D  
Acq On : 10 Jan 2012 9:40  
Operator :  
Sample : PA- [REDACTED] 8-Day1  
Misc : 1.0 uL PA- [REDACTED] 8-Day1 at 1 mL  
ALS Vial : 54 Sample Multiplier: 1

Quant Method : C:\msdchem\1\METHODS\TLTICPAH.M  
Quant Title : PAH5437

TIC Library : C:\Database\NIST08.L  
TIC Integration Parameters: rteint.p

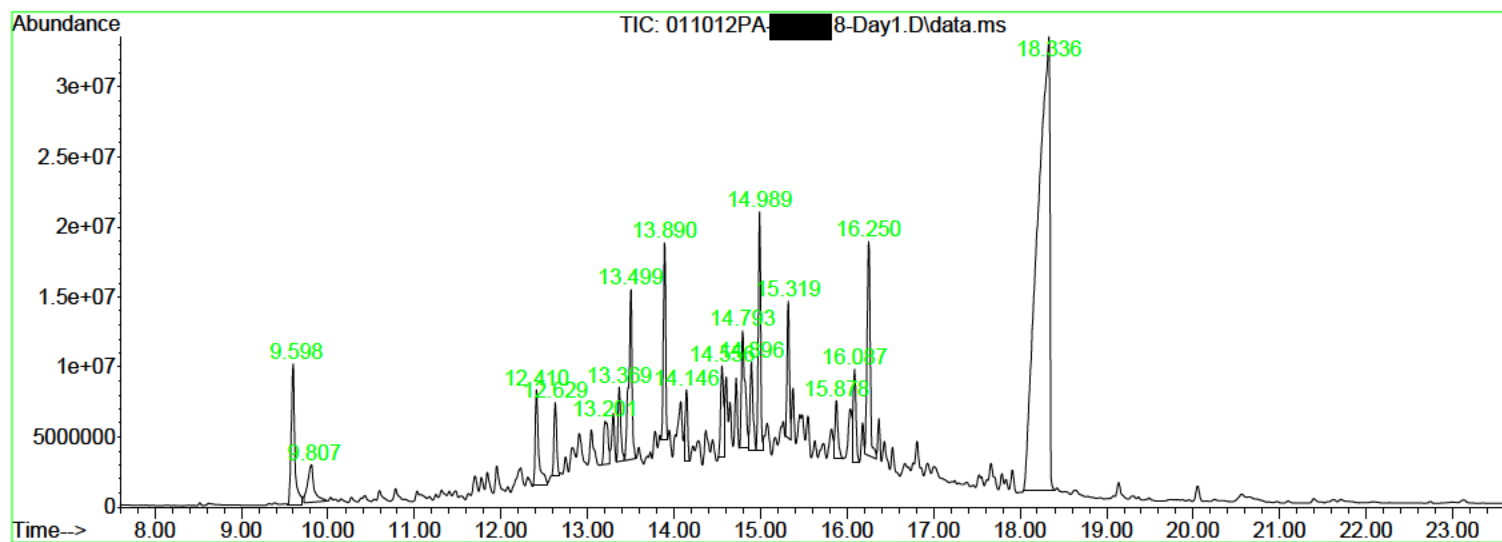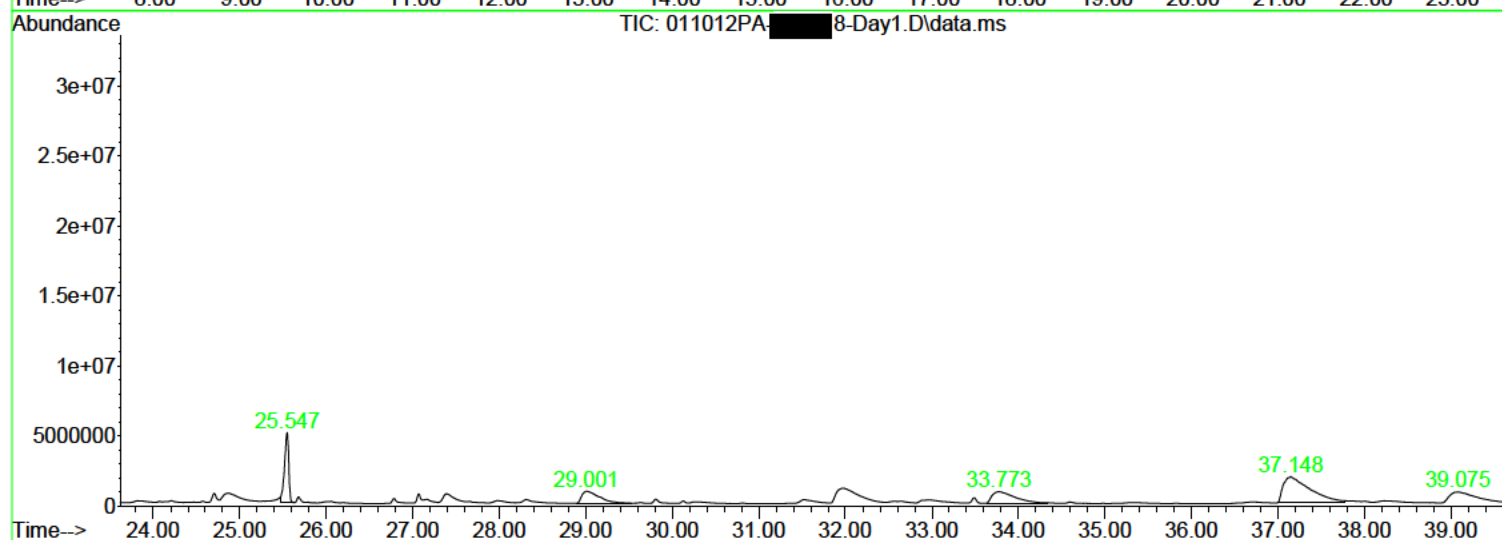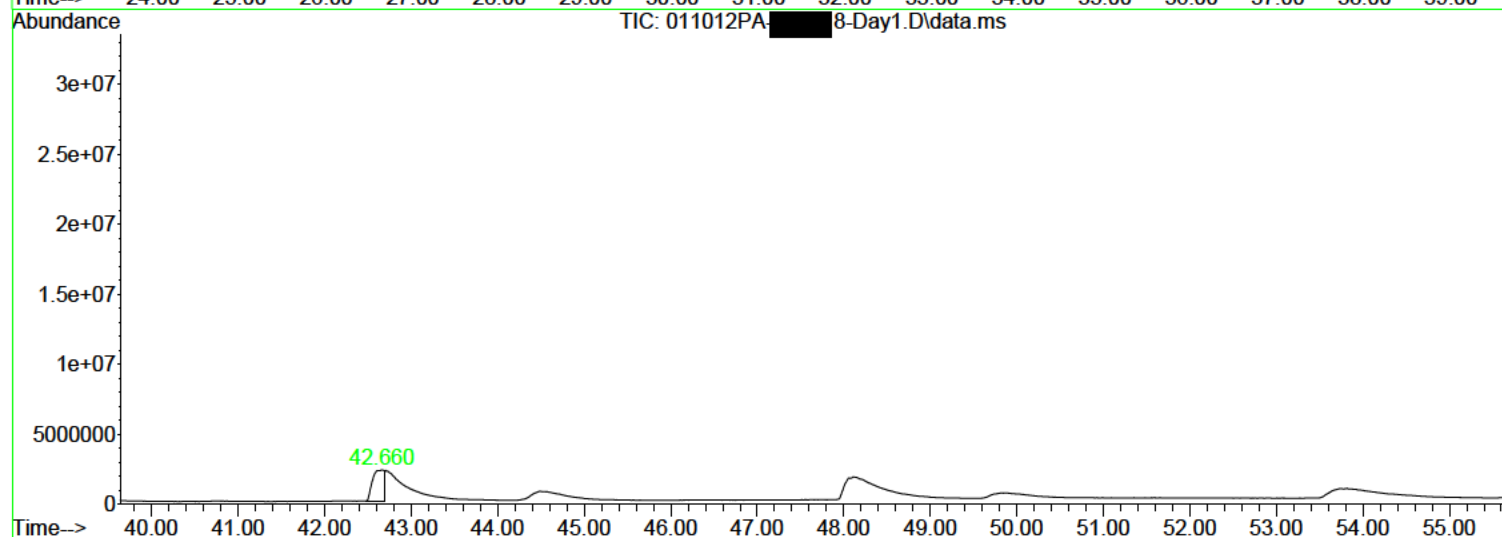

Data Path : C:\msdchem\1\LEGACY\2012\January\  
Data File : 011012PA-8-Day1.D  
Acq On : 10 Jan 2012 9:40  
Operator :  
Sample : PA-Blaker8-Day1  
Misc : 1.0 uL PA-8-Day1 at 1 mL  
ALS Vial : 54 Sample Multiplier: 1

Quant Method : C:\msdchem\1\METHODS\TLTICPAH.M  
Quant Title : PAH5437

TIC Library : C:\Database\NIST08.L  
TIC Integration Parameters: rteint.p

\*\*\*\*\*  
Peak Number 1 Tetramethylbutanedinitrile Concentration Rank 6

| R.T.    | EstConc    | Area                                | Relative to ISTD  |          | R.T.         |      |
|---------|------------|-------------------------------------|-------------------|----------|--------------|------|
| 9.598   | 2917.74 ng | 29177400                            | External Standard |          | 0.000        |      |
| Hit# of | 5          | Tentative ID                        | MW                | MolForm  | CAS#         | Qual |
| 1       |            | Tetramethylbutanedinitrile          | 136               | C8H12N2  | 003333-52-6  | 83   |
| 2       |            | Propanenitrile, 2,2'-azobis[2-me... | 164               | C8H12N4  | 000078-67-1  | 83   |
| 3       |            | Tetramethylbutanedinitrile          | 136               | C8H12N2  | 003333-52-6  | 83   |
| 4       |            | 1,5-Pentanediol, o,o'-di(proparg... | 268               | C13H16O6 | 1000331-35-4 | 45   |
| 5       |            | Propanenitrile, 2,2'-azobis[2-me... | 164               | C8H12N4  | 000078-67-1  | 35   |

\*\*\*\*\*  
Peak Number 2 Formamide, N-methylthio Concentration Rank 18

| R.T.    | EstConc    | Area                     | Relative to ISTD  |         |              | R.T.  |
|---------|------------|--------------------------|-------------------|---------|--------------|-------|
| 9.807   | 1405.41 ng | 14054100                 | External Standard |         |              | 0.000 |
| Hit# of | 5          | Tentative ID             | MW                | MolForm | CAS#         | Qual  |
| 1       |            | Formamide, N-methylthio  | 75                | C2H5NS  | 018952-41-5  | 78    |
| 2       |            | Ethanethioamide          | 75                | C2H5NS  | 000062-55-5  | 5     |
| 3       |            | Ethanethioamide          | 75                | C2H5NS  | 000062-55-5  | 5     |
| 4       |            | o-Isopropylhydroxylamine | 75                | C3H9NO  | 1000322-42-6 | 4     |
| 5       |            | Formamide, N-methoxy-    | 75                | C2H5NO2 | 034005-41-9  | 4     |

\*\*\*\*\*  
Peak Number 3 Dodecane Concentration Rank 10

| R.T.    | EstConc    | Area                           | Relative to ISTD  |         | R.T.        |      |
|---------|------------|--------------------------------|-------------------|---------|-------------|------|
| 12.410  | 1928.61 ng | 19286100                       | External Standard |         | 0.000       |      |
| Hit# of | 5          | Tentative ID                   | MW                | MolForm | CAS#        | Qual |
| 1       |            | Dodecane                       | 170               | C12H26  | 000112-40-3 | 95   |
| 2       |            | Dodecane                       | 170               | C12H26  | 000112-40-3 | 94   |
| 3       |            | Dodecane                       | 170               | C12H26  | 000112-40-3 | 90   |
| 4       |            | Tetradecane                    | 198               | C14H30  | 000629-59-4 | 86   |
| 5       |            | Pentadecane, 2,6,10-trimethyl- | 254               | C18H38  | 003892-00-0 | 80   |

\*\*\*\*\*  
Peak Number 4 Dodecane, 2-methyl- Concentration Rank 20

| R.T.    | EstConc    | Area                         | Relative to ISTD  |         | R.T.        |      |
|---------|------------|------------------------------|-------------------|---------|-------------|------|
| 13.369  | 1171.22 ng | 11712200                     | External Standard |         | 0.000       |      |
| Hit# of | 5          | Tentative ID                 | MW                | MolForm | CAS#        | Qual |
| 1       |            | Dodecane, 2-methyl-          | 184               | C13H28  | 001560-97-0 | 93   |
| 2       |            | Dodecane, 2-methyl-6-propyl- | 226               | C16H34  | 055045-08-4 | 72   |
| 3       |            | Undecane, 3-methyl-          | 170               | C12H26  | 001002-43-3 | 72   |

Data Path : C:\msdchem\1\LEGACY\2012\January\  
 Data File : 011012PA-8-Day1.D  
 Acq On : 10 Jan 2012 9:40  
 Operator :  
 Sample : PA-Blaker8-Day1  
 Misc : 1.0 uL PA-8-Day1 at 1 mL  
 ALS Vial : 54 Sample Multiplier: 1

Quant Method : C:\msdchem\1\METHODS\TLTICPAH.M  
 Quant Title : PAH5437

TIC Library : C:\Database\NIST08.L  
 TIC Integration Parameters: rteint.p

|                       |            |             |    |
|-----------------------|------------|-------------|----|
| 4 Dodecane, 2-methyl- | 184 C13H28 | 001560-97-0 | 64 |
| 5 Dodecane, 2-methyl- | 184 C13H28 | 001560-97-0 | 59 |

\*\*\*\*\*  
 Peak Number 5 Octane, 2,6-dimethyl- Concentration Rank 4

| R.T.   | EstConc    | Area     | Relative to ISTD  | R.T.  |
|--------|------------|----------|-------------------|-------|
| 13.499 | 3320.99 ng | 33209900 | External Standard | 0.000 |

  

| Hit# of | 5 | Tentative ID          | MW  | MolForm  | CAS#        | Qual |
|---------|---|-----------------------|-----|----------|-------------|------|
| 1       |   | Octane, 2,6-dimethyl- | 142 | C10H22   | 002051-30-1 | 87   |
| 2       |   | Nonane, 3-methyl-     | 142 | C10H22   | 005911-04-6 | 83   |
| 3       |   | Bacchotricuneatin c   | 342 | C20H22O5 | 066563-30-2 | 72   |
| 4       |   | Octane, 3,6-dimethyl- | 142 | C10H22   | 015869-94-0 | 72   |
| 5       |   | Decane, 4-methyl-     | 156 | C11H24   | 002847-72-5 | 64   |

\*\*\*\*\*  
 Peak Number 6 Tridecane Concentration Rank 7

| R.T.   | EstConc    | Area     | Relative to ISTD  | R.T.  |
|--------|------------|----------|-------------------|-------|
| 13.890 | 2607.53 ng | 26075300 | External Standard | 0.000 |

  

| Hit# of | 5 | Tentative ID | MW  | MolForm | CAS#        | Qual |
|---------|---|--------------|-----|---------|-------------|------|
| 1       |   | Tridecane    | 184 | C13H28  | 000629-50-5 | 97   |
| 2       |   | Tridecane    | 184 | C13H28  | 000629-50-5 | 97   |
| 3       |   | Tridecane    | 184 | C13H28  | 000629-50-5 | 93   |
| 4       |   | Tridecane    | 184 | C13H28  | 000629-50-5 | 90   |
| 5       |   | Hexadecane   | 226 | C16H34  | 000544-76-3 | 90   |

\*\*\*\*\*  
 Peak Number 7 Heptylcyclohexane Concentration Rank 14

| R.T.   | EstConc    | Area     | Relative to ISTD  | R.T.  |
|--------|------------|----------|-------------------|-------|
| 14.556 | 1492.48 ng | 14924800 | External Standard | 0.000 |

  

| Hit# of | 5 | Tentative ID                   | MW  | MolForm | CAS#        | Qual |
|---------|---|--------------------------------|-----|---------|-------------|------|
| 1       |   | Heptylcyclohexane              | 182 | C13H26  | 005617-41-4 | 90   |
| 2       |   | Cyclohexane, undecyl-          | 238 | C17H34  | 054105-66-7 | 86   |
| 3       |   | Cyclohexane, (4-methylpentyl)- | 168 | C12H24  | 061142-20-9 | 80   |
| 4       |   | Cyclohexane, hexyl-            | 168 | C12H24  | 004292-75-5 | 72   |
| 5       |   | Heptylcyclohexane              | 182 | C13H26  | 005617-41-4 | 68   |

\*\*\*\*\*  
 Peak Number 8 Tridecane, 2-methyl- Concentration Rank 8

| R.T.   | EstConc    | Area     | Relative to ISTD  | R.T.  |
|--------|------------|----------|-------------------|-------|
| 14.793 | 2477.86 ng | 24778600 | External Standard | 0.000 |

  

| Hit# of | 5 | Tentative ID | MW | MolForm | CAS# | Qual |
|---------|---|--------------|----|---------|------|------|
|---------|---|--------------|----|---------|------|------|

Data Path : C:\msdchem\1\LEGACY\2012\January\  
 Data File : 011012PA-8-Day1.D  
 Acq On : 10 Jan 2012 9:40  
 Operator :  
 Sample : PA-8-Day1  
 Misc : 1.0 uL PA-8-Day1 at 1 mL  
 ALS Vial : 54 Sample Multiplier: 1

Quant Method : C:\msdchem\1\METHODS\TLTICPAH.M  
 Quant Title : PAH5437

TIC Library : C:\Database\NIST08.L  
 TIC Integration Parameters: rteint.p

|   |                      |     |        |             |    |
|---|----------------------|-----|--------|-------------|----|
| 1 | Tridecane, 2-methyl- | 198 | C14H30 | 001560-96-9 | 93 |
| 2 | Tridecane, 2-methyl- | 198 | C14H30 | 001560-96-9 | 83 |
| 3 | Tridecane, 2-methyl- | 198 | C14H30 | 001560-96-9 | 81 |
| 4 | Eicosane, 10-methyl- | 296 | C21H44 | 054833-23-7 | 80 |
| 5 | Heptadecane          | 240 | C17H36 | 000629-78-7 | 80 |

\*\*\*\*\*  
 Peak Number 9 3,5-Dimethyldodecane Concentration Rank 16

| R.T.      | EstConc              | Area     | Relative to ISTD  |             |      | R.T.  |
|-----------|----------------------|----------|-------------------|-------------|------|-------|
| 14.896    | 1451.94 ng           | 14519400 | External Standard |             |      | 0.000 |
| Hit# of 5 | Tentative ID         | MW       | MolForm           | CAS#        | Qual |       |
| 1         | 3,5-Dimethyldodecane | 198      | C14H30            | 107770-99-0 | 83   |       |
| 2         | 2,6-Dimethyldecane   | 170      | C12H26            | 013150-81-7 | 76   |       |
| 3         | 2-Bromo dodecane     | 248      | C12H25Br          | 013187-99-0 | 72   |       |
| 4         | Dodecane, 2-methyl-  | 184      | C13H28            | 001560-97-0 | 53   |       |
| 5         | Octacosane           | 394      | C28H58            | 000630-02-4 | 53   |       |

\*\*\*\*\*  
 Peak Number 10 Hexadecane, 2,6,10,14-tetra... Concentration Rank 5

| R.T.      | EstConc                            | Area     | Relative to ISTD  | R.T.        |      |
|-----------|------------------------------------|----------|-------------------|-------------|------|
| 14.989    | 3276.89 ng                         | 32768900 | External Standard | 0.000       |      |
| Hit# of 5 | Tentative ID                       | MW       | MolForm           | CAS#        | Qual |
| 1         | Hexadecane, 2,6,10,14-tetramethyl- | 282      | C20H42            | 000638-36-8 | 90   |
| 2         | Decane, 5-propyl-                  | 184      | C13H28            | 017312-62-8 | 72   |
| 3         | Tetradecane, 4-methyl-             | 212      | C15H32            | 025117-24-2 | 72   |
| 4         | Bacchotricuneatin c                | 342      | C20H22O5          | 066563-30-2 | 64   |
| 5         | Dodecane, 2,6,10-trimethyl-        | 212      | C15H32            | 003891-98-3 | 64   |

\*\*\*\*\*  
 Peak Number 11 Tetradecane Concentration Rank 11

| R.T.      | EstConc      | Area     | Relative to ISTD  |             |      | R.T.  |
|-----------|--------------|----------|-------------------|-------------|------|-------|
| 15.319    | 1865.81 ng   | 18658100 | External Standard |             |      | 0.000 |
| Hit# of 5 | Tentative ID | MW       | MolForm           | CAS#        | Qual |       |
| 1         | Tetradecane  | 198      | C14H30            | 000629-59-4 | 96   |       |
| 2         | Tetradecane  | 198      | C14H30            | 000629-59-4 | 96   |       |
| 3         | Tetradecane  | 198      | C14H30            | 000629-59-4 | 95   |       |
| 4         | Octadecane   | 254      | C18H38            | 000593-45-3 | 93   |       |
| 5         | Tetradecane  | 198      | C14H30            | 000629-59-4 | 93   |       |

\*\*\*\*\*  
 Peak Number 12 Cyclohexane, octyl- Concentration Rank 17

| R.T. | EstConc | Area | Relative to ISTD | R.T. |
|------|---------|------|------------------|------|
|------|---------|------|------------------|------|

Data Path : C:\msdchem\1\LEGACY\2012\January\  
 Data File : 011012PA-8-Day1.D  
 Acq On : 10 Jan 2012 9:40  
 Operator :  
 Sample : PA-8-Day1  
 Misc : 1.0 uL PA-8-Day1 at 1 mL  
 ALS Vial : 54 Sample Multiplier: 1

Quant Method : C:\msdchem\1\METHODS\TLTICPAH.M  
 Quant Title : PAH5437

TIC Library : C:\Database\NIST08.L  
 TIC Integration Parameters: rteint.p

| 16.087  | 1416.57 ng                     | 14165700     | External Standard | 0.000          |
|---------|--------------------------------|--------------|-------------------|----------------|
| Hit# of | 5                              | Tentative ID | MW MolForm        | CAS# Qual      |
| 1       | Cyclohexane, octyl-            | 196          | C14H28            | 001795-15-9 68 |
| 2       | Cyclohexane, pentyl-           | 154          | C11H22            | 004292-92-6 59 |
| 3       | Cyclohexane, (4-methylpentyl)- | 168          | C12H24            | 061142-20-9 59 |
| 4       | Cyclohexane, octyl-            | 196          | C14H28            | 001795-15-9 59 |
| 5       | Cyclohexane, pentyl-           | 154          | C11H22            | 004292-92-6 59 |

\*\*\*\*\*  
 Peak Number 13 Hexadecane Concentration Rank 3

| R.T.    | EstConc                             | Area         | Relative to ISTD  | R.T.           |
|---------|-------------------------------------|--------------|-------------------|----------------|
| 16.250  | 3886.59 ng                          | 38865900     | External Standard | 0.000          |
| Hit# of | 5                                   | Tentative ID | MW MolForm        | CAS# Qual      |
| 1       | Hexadecane                          | 226          | C16H34            | 000544-76-3 93 |
| 2       | Bacchotricuneatin c                 | 342          | C20H22O5          | 066563-30-2 92 |
| 3       | Heptadecane, 2,6,10,14-tetramethyl- | 296          | C21H44            | 018344-37-1 90 |
| 4       | Pentadecane, 4-methyl-              | 226          | C16H34            | 002801-87-8 81 |
| 5       | Dodecane, 4,6-dimethyl-             | 198          | C14H30            | 061141-72-8 81 |

\*\*\*\*\*  
 Peak Number 14 Hexahydro-1,3,5-trimethyl-1... Concentration Rank 1

| R.T.    | EstConc                             | Area         | Relative to ISTD  | R.T.           |
|---------|-------------------------------------|--------------|-------------------|----------------|
| 18.336  | 32369.60 ng                         | 323696000    | External Standard | 0.000          |
| Hit# of | 5                                   | Tentative ID | MW MolForm        | CAS# Qual      |
| 1       | Hexahydro-1,3,5-trimethyl-1,3,5-... | 159          | C6H13N3S          | 059887-80-8 72 |
| 2       | Quinoline, 6-methoxy-               | 159          | C10H9NO           | 005263-87-6 50 |
| 3       | 8-Quinolinol, 4-methyl-             | 159          | C10H9NO           | 003846-73-9 37 |
| 4       | Oxazole, 4-methyl-2-phenyl-         | 159          | C10H9NO           | 000877-39-4 25 |
| 5       | 4,6-Difluoro-2-dimethylaminopyri... | 159          | C6H7F2N3          | 165258-63-9 9  |

\*\*\*\*\*  
 Peak Number 15 Cyclic octaatomic sulfur Concentration Rank 12

| R.T.    | EstConc                             | Area         | Relative to ISTD  | R.T.           |
|---------|-------------------------------------|--------------|-------------------|----------------|
| 25.547  | 1709.98 ng                          | 17099800     | External Standard | 0.000          |
| Hit# of | 5                                   | Tentative ID | MW MolForm        | CAS# Qual      |
| 1       | Cyclic octaatomic sulfur            | 256          | S8                | 010544-50-0 52 |
| 2       | Benzoic acid, 2,5-dinitro-          | 212          | C7H4N2O6          | 000610-28-6 32 |
| 3       | 7-Amino-7H-S-triazolo[5,1-c]-S-t... | 156          | C3H4N6S           | 013728-28-4 28 |
| 4       | N,N'-Pentamethylenebis[s-3-amino... | 410          | C11H26N2O6S4      | 035871-54-6 25 |
| 5       | Benzofuran, 3-(4-chlorophenyl)-2... | 256          | C16H13ClO         | 074228-99-2 9  |

Data Path : C:\msdchem\1\LEGACY\2012\January\  
 Data File : 011012PA-8-Day1.D  
 Acq On : 10 Jan 2012 9:40  
 Operator :  
 Sample : PA-Blaker8-Day1  
 Misc : 1.0 uL PA-8-Day1 at 1 mL  
 ALS Vial : 54 Sample Multiplier: 1

Quant Method : C:\msdchem\1\METHODS\TLTICPAH.M  
 Quant Title : PAH5437

TIC Library : C:\Database\NIST08.L  
 TIC Integration Parameters: rteint.p

\*\*\*\*\*  
 Peak Number 16 Butyric acid, octadecyl ester Concentration Rank 19

| R.T.      | EstConc                             | Area     | Relative to ISTD  |              | R.T.  |
|-----------|-------------------------------------|----------|-------------------|--------------|-------|
| 29.001    | 1187.82 ng                          | 11878200 | External Standard |              | 0.000 |
| Hit# of 5 | Tentative ID                        | MW       | MolForm           | CAS#         | Qual  |
| 1         | Butyric acid, octadecyl ester       | 340      | C22H44O2          | 013373-83-6  | 64    |
| 2         | Tetraethylene glycol monododecyl... | 362      | C20H42O5          | 005274-68-0  | 64    |
| 3         | Isobutyric acid, octadecyl ester    | 340      | C22H44O2          | 013373-82-5  | 59    |
| 4         | 3-(2,5,8,11,14-Pentaoxacyclohexa... | 510      | C24H46O11         | 1000110-99-4 | 59    |
| 5         | 3-Hydroxymyristic acid              | 244      | C14H28O3          | 001961-72-4  | 53    |

\*\*\*\*\*  
 Peak Number 17 Heptaethylene glycol monodo... Concentration Rank 15

| R.T.      | EstConc                             | Area     | Relative to ISTD  |             | R.T.  |
|-----------|-------------------------------------|----------|-------------------|-------------|-------|
| 33.773    | 1462.44 ng                          | 14624400 | External Standard |             | 0.000 |
| Hit# of 5 | Tentative ID                        | MW       | MolForm           | CAS#        | Qual  |
| 1         | Heptaethylene glycol monododecyl... | 494      | C26H54O8          | 003055-97-8 | 86    |
| 2         | Pentaethylene glycol monododecyl... | 406      | C22H46O6          | 003055-95-6 | 86    |
| 3         | Pentaethylene glycol                | 238      | C10H22O6          | 004792-15-8 | 86    |
| 4         | Tetraethylene glycol monododecyl... | 362      | C20H42O5          | 005274-68-0 | 83    |
| 5         | Hexagol                             | 282      | C12H26O7          | 002615-15-8 | 72    |

\*\*\*\*\*  
 Peak Number 18 Bis(dibutylamino)dichlorosi... Concentration Rank 2

| R.T.      | EstConc                             | Area     | Relative to ISTD  |              | R.T.  |
|-----------|-------------------------------------|----------|-------------------|--------------|-------|
| 37.148    | 4045.60 ng                          | 40456000 | External Standard |              | 0.000 |
| Hit# of 5 | Tentative ID                        | MW       | MolForm           | CAS#         | Qual  |
| 1         | Bis(dibutylamino)dichlorosilane     | 354      | C16H36Cl2N2Si     | 1000322-56-4 | 43    |
| 2         | Naphthalen-1-amine, N-(5-methoxy... | 311      | C22H17NO          | 1000276-25-8 | 28    |
| 3         | Quinazolin-4(3H)-one, 3-(4-metho... | 311      | C16H13N3O4        | 1000268-92-7 | 25    |
| 4         | Ethanol, 2-[2-[2-[2-[p-(1,1,3,3-... | 382      | C22H38O5          | 002315-63-1  | 16    |
| 5         | 3,6,9,12,15-Pentaoxabicyclo[15.3... | 312      | C16H24O6          | 065112-36-9  | 10    |

\*\*\*\*\*  
 Peak Number 19 Hexagol Concentration Rank 13

| R.T.      | EstConc                          | Area     | Relative to ISTD  |              | R.T.  |
|-----------|----------------------------------|----------|-------------------|--------------|-------|
| 39.075    | 1579.47 ng                       | 15794700 | External Standard |              | 0.000 |
| Hit# of 5 | Tentative ID                     | MW       | MolForm           | CAS#         | Qual  |
| 1         | Hexagol                          | 282      | C12H26O7          | 002615-15-8  | 86    |
| 2         | Hexagol                          | 282      | C12H26O7          | 002615-15-8  | 86    |
| 3         | 2-[2-[2-[2-[2-(2-Hydroxyethox... | 326      | C14H30O8          | 1000352-13-3 | 80    |

Data Path : C:\msdchem\1\LEGACY\2012\January\  
Data File : 011012PA-8-Day1.D  
Acq On : 10 Jan 2012 9:40  
Operator :  
Sample : PA-Blaker8-Day1  
Misc : 1.0 uL PA-8-Day1 at 1 mL  
ALS Vial : 54 Sample Multiplier: 1

Quant Method : C:\msdchem\1\METHODS\TLTICPAH.M  
Quant Title : PAH5437

TIC Library : C:\Database\NIST08.L  
TIC Integration Parameters: rteint.p

|   |                                  |     |          |              |    |
|---|----------------------------------|-----|----------|--------------|----|
| 4 | Octaethylene glycol              | 370 | C16H34O9 | 1000289-34-2 | 80 |
| 5 | 2-[2-[2-[2-[2-[2-(2-Hydroxyet... | 370 | C16H34O9 | 005117-19-1  | 80 |

\*\*\*\*\*  
Peak Number 20 Cobalt, bis(.eta.-5-piperid... Concentration Rank 9

| R.T.   | EstConc    | Area     | Relative to ISTD  | R.T.  |
|--------|------------|----------|-------------------|-------|
| 42.660 | 2011.58 ng | 20115800 | External Standard | 0.000 |

| Hit# | of | 5 | Tentative ID                        | MW  | MolForm    | CAS#         | Qual |
|------|----|---|-------------------------------------|-----|------------|--------------|------|
| 1    |    |   | Cobalt, bis(.eta.-5-piperidinylc... | 355 | C20H28CoN2 | 1000162-04-6 | 27   |
| 2    |    |   | Aspidospermidine-1-ethanol, 17-h... | 386 | C23H34N2O3 | 054725-07-4  | 27   |
| 3    |    |   | Silane, dimethyl(4-(2-phenylprop... | 370 | C23H34O2Si | 1000347-19-1 | 12   |
| 4    |    |   | 1,2-Dihydro-2-methylpapaverine      | 355 | C21H25NO4  | 1000128-57-7 | 12   |
| 5    |    |   | (4-Methyl-6-phenylpyrimidin-2-yl... | 355 | C22H21N5   | 1000303-17-5 | 12   |



Data Path : C:\msdchem\1\LEGACY\2012\January\  
 Data File : 011012PA-8-Day1.D  
 Acq On : 10 Jan 2012 9:40  
 Operator :  
 Sample : PA-Blaker8-Day1  
 Misc : 1.0 uL PA-8-Day1 at 1 mL  
 ALS Vial : 54 Sample Multiplier: 1

Quant Method : C:\msdchem\1\METHODS\TLTICPAH.M  
 Quant Title : PAH5437

TIC Library : C:\Database\NIST08.L  
 TIC Integration Parameters: rteint.p

| TIC Top Hit name   | RT     | EstConc | Units | Response  | --Internal Standard-- |       |       |      |
|--------------------|--------|---------|-------|-----------|-----------------------|-------|-------|------|
|                    |        |         |       |           | #                     | RT    | Resp  | Conc |
| Tetramethylbuta... | 9.598  | 2917.7  | ng    | 29177400  | 0                     | 0.000 | 10000 | 1.0  |
| Formamide, N-me... | 9.807  | 1405.4  | ng    | 14054100  | 0                     | 0.000 | 10000 | 1.0  |
| Dodecane           | 12.410 | 1928.6  | ng    | 19286100  | 0                     | 0.000 | 10000 | 1.0  |
| Dodecane, 2-met... | 13.369 | 1171.2  | ng    | 11712200  | 0                     | 0.000 | 10000 | 1.0  |
| Octane, 2,6-dim... | 13.499 | 3321.0  | ng    | 33209900  | 0                     | 0.000 | 10000 | 1.0  |
| Tridecane          | 13.890 | 2607.5  | ng    | 26075300  | 0                     | 0.000 | 10000 | 1.0  |
| Heptylcyclohexane  | 14.556 | 1492.5  | ng    | 14924800  | 0                     | 0.000 | 10000 | 1.0  |
| Tridecane, 2-me... | 14.793 | 2477.9  | ng    | 24778600  | 0                     | 0.000 | 10000 | 1.0  |
| 3,5-Dimethyldod... | 14.896 | 1451.9  | ng    | 14519400  | 0                     | 0.000 | 10000 | 1.0  |
| Hexadecane, 2,6... | 14.989 | 3276.9  | ng    | 32768900  | 0                     | 0.000 | 10000 | 1.0  |
| Tetradecane        | 15.319 | 1865.8  | ng    | 18658100  | 0                     | 0.000 | 10000 | 1.0  |
| Cyclohexane, oc... | 16.087 | 1416.6  | ng    | 14165700  | 0                     | 0.000 | 10000 | 1.0  |
| Hexadecane         | 16.250 | 3886.6  | ng    | 38865900  | 0                     | 0.000 | 10000 | 1.0  |
| Hexahydro-1,3,5... | 18.336 | 32369.6 | ng    | 323696000 | 0                     | 0.000 | 10000 | 1.0  |
| Cyclic octaatom... | 25.547 | 1710.0  | ng    | 17099800  | 0                     | 0.000 | 10000 | 1.0  |
| Butyric acid, o... | 29.001 | 1187.8  | ng    | 11878200  | 0                     | 0.000 | 10000 | 1.0  |
| Heptaethylene g... | 33.773 | 1462.4  | ng    | 14624400  | 0                     | 0.000 | 10000 | 1.0  |
| Bis(dibutylamin... | 37.148 | 4045.6  | ng    | 40456000  | 0                     | 0.000 | 10000 | 1.0  |
| Hexagol            | 39.075 | 1579.5  | ng    | 15794700  | 0                     | 0.000 | 10000 | 1.0  |
| Cobalt, bis(.et... | 42.660 | 2011.6  | ng    | 20115800  | 0                     | 0.000 | 10000 | 1.0  |
