# Supplementary material
Source: publisher figshare collection journal article supplement (https://wiley.figshare.com/articles/dataset/_/6176210)
Supplement: Supplementary file 13 [file 1]

7/23/2013

# Ionic Strength RNA extraction

09/20/13  
notes

| Sample ID                | Tube # | RNA conc. / Ratio  | 260/280 |
|--------------------------|--------|--------------------|---------|
| 1-1 0hr                  | IS01   | 68.3 ng/ul / 2.06  |         |
| 1-2 0hr                  | IS02   | 69.3 ng/ul / 2.07  |         |
| 1-3 0hr                  | IS03   | 70.6 ng/ul / 2.06  |         |
| 1-4 4hr undiluted        | IS04   | 102.9 ng/ul / 2.09 |         |
| 1-5 4hr undiluted        | IS05   | 120.0 ng/ul / 2.11 |         |
| 1-6 4hr " "              | IS06   | 77.1 ng/ul / 2.06  |         |
| 2-1 4hr 1:50             | IS07   | 69.8 ng/ul / 2.07  |         |
| 2-2 4hr 1:50             | IS08   | 65.4 ng/ul / 2.06  |         |
| 2-3 4hr 1:50             | IS09   | 47.7 ng/ul / 2.06  |         |
| 2-4 4hr 1:100            | IS10   | 110.7 ng/ul / 2.09 |         |
| 2-5 4hr 1:100            | IS11   | 55.9 ng/ul / 2.03  |         |
| 2-6 4hr 1:100            | IS12   | 141.6 ng/ul / 2.07 |         |
| 3-1 6hr no trt - control | IS13   | 53.5 ng/ul / 2.04  |         |
| 3-2 6hr " "              | IS14   | 52.6 ng/ul / 2.04  |         |
| 3-3 6hr " "              | IS15   | 58.2 ng/ul / 2.03  |         |
| 3-4 6hr 1:50             | IS16   | 47.4 ng/ul / 1.95  |         |
| 3-5 6hr 1:50             | IS17   | 37.2 ng/ul / 1.92  |         |
| 3-6 6hr 1:50             | IS18   | 60.4 ng/ul / 2.13  |         |
| 4-1 6hr 1:100            | IS19   | 55.1 ng/ul / 2.06  |         |
| 4-2 6hr 1:100            | IS20   | 53.0 ng/ul / 2.08  |         |
| 4-3 6hr 1:100            | IS21   | 37.4 ng/ul / 2.13  |         |
| 4-4 8hr no trt - control | IS22   | 140.5 ng/ul / 2.07 |         |
| 4-5 8hr " "              | IS23   | 90.7 ng/ul / 2.06  |         |
| 4-6 8hr " "              | IS24   | 60.5 ng/ul / 2.02  |         |

| Sample ID         | Tube # | RNA conc. / Ratio  | notes |
|-------------------|--------|--------------------|-------|
| 5-1 8hr 1:50      | IS25   | 53.1 ng/ul / 2.04  |       |
| 5-2 8hr 1:50      | IS26   | 69.8 ng/ul / 1.98  |       |
| 5-3 8hr 1:50      | IS27   | 76.5 ng/ul / 2.03  |       |
| 5-4 8hr 1:100     | IS28   | 80.9 ng/ul / 2.07  |       |
| 5-5 8hr 1:100     | IS29   | 60.2 ng/ul / 1.94  |       |
| 5-6 8hr 1:100     | IS30   | 131.9 ng/ul / 2.06 |       |
| 6-1 21hr 0 hr     | IS31   | 101.1 ng/ul / 2.09 |       |
| 6-2 21hr " "      | IS32   | 124.6 ng/ul / 2.08 |       |
| 6-3 21hr " "      | IS33   | 116.1 ng/ul / 2.09 |       |
| 6-4 21hr 1:50     | IS34   | 51.4 ng/ul / 2.08  |       |
| 6-5 21hr 1:50     | IS35   | 62.4 ng/ul / 2.08  |       |
| 6-6 21hr 1:50     | IS36   | 58.4 ng/ul / 2.11  |       |
| 7-1 21hr 1:100    | IS37   | 94.6 ng/ul / 2.09  |       |
| 7-2 21hr 1:100    | IS38   | 111.7 ng/ul / 2.10 |       |
| 7-3 21hr 1:100    | IS39   | 109.1 ng/ul / 2.11 |       |
| 7-4 24hr '0' ctrl | IS40   | 125.0 ng/ul / 2.09 |       |
| 7-5 24hr '0' ctrl | IS41   | 119.4 ng/ul / 2.10 |       |
| 7-6 24hr '0' ctrl | IS42   | 105.2 ng/ul / 2.08 |       |
| 8-1 24hr 1:50     | IS43   | 66.1 ng/ul / 2.05  |       |
| 8-2 24hr 1:50     | IS44   | 64.9 ng/ul / 2.08  |       |
| 8-3 24hr 1:50     | IS45   | 55.8 ng/ul / 2.09  |       |
| 8-4 24hr 1:100    | IS46   | 102.0 ng/ul / 2.10 |       |
| 8-5 24hr 1:100    | IS47   | 89.8 ng/ul / 2.07  |       |
| 8-6 24hr 1:100    | IS48   | 97.7 ng/ul / 2.04  |       |
