# Supplementary material
Source: publisher figshare collection journal article supplement (https://wiley.figshare.com/articles/dataset/_/6176210)
Supplement: Supplementary file 14 [file 1]

Data Path : C:\msdchem\1\LEGACY\2012\January\  
Data File : 011112PA-8-Day3.D  
Acq On : 11 Jan 2012 10:55  
Operator :  
Sample : PA-Blaker8-Day3  
Misc : 1.0 uL PA-8-Day3 at 1 mL dilute 1/10  
ALS Vial : 59 Sample Multiplier: 1

Integration Parameters: rteint.p

Integrator: RTE  
Smoothing : ON Filtering: 5  
Sampling : 1 Min Area: 3 % of largest Peak  
Start Thrs: 0.2 Max Peaks: 100  
Stop Thrs : 0 Peak Location: TOP

If leading or trailing edge < 100 prefer < Baseline drop else tangent >  
Peak separation: 5

Method : C:\msdchem\1\METHODS\TLTICPAH.M  
Title : PAH5437

Signal : TIC: 011112PA-8-Day3.D\data.ms

| peak<br># | R.T.<br>min | first<br>scan | max<br>scan | last<br>scan | PK<br>TY | peak<br>height | corr.<br>area | corr.<br>% max. | % of<br>total |
|-----------|-------------|---------------|-------------|--------------|----------|----------------|---------------|-----------------|---------------|
| 1         | 12.405      | 1025          | 1034        | 1061         | rBV      | 3042276        | 7106123       | 4.83%           | 3.742%        |
| 2         | 13.490      | 1254          | 1267        | 1280         | rVB2     | 2502148        | 6578454       | 4.47%           | 3.465%        |
| 3         | 13.881      | 1343          | 1351        | 1360         | rBV      | 5990038        | 10886036      | 7.40%           | 5.733%        |
| 4         | 14.975      | 1578          | 1586        | 1594         | rBV      | 2939110        | 5366629       | 3.65%           | 2.826%        |
| 5         | 15.310      | 1649          | 1658        | 1665         | rBV      | 4471820        | 8321470       | 5.66%           | 4.382%        |
| 6         | 16.232      | 1848          | 1856        | 1868         | rBV      | 2137726        | 4580865       | 3.12%           | 2.412%        |
| 7         | 33.563      | 5544          | 5579        | 5655         | rBV2     | 31959874       | 147041946     | 100.00%         | 77.439%       |

Sum of corrected areas: 189881523

Data Path : C:\msdchem\1\LEGACY\2012\January\  
Data File : 011112PA- 8-Day3.D  
Acq On : 11 Jan 2012 10:55  
Operator :  
Sample : PA-Blaker8-Day3  
Misc : 1.0 uL PA- 8-Day3 at 1 mL dilute 1/10  
ALS Vial : 59 Sample Multiplier: 1

Quant Method : C:\msdchem\1\METHODS\TLTICPAH.M  
Quant Title : PAH5437

TIC Library : C:\Database\NIST08.L  
TIC Integration Parameters: rteint.p

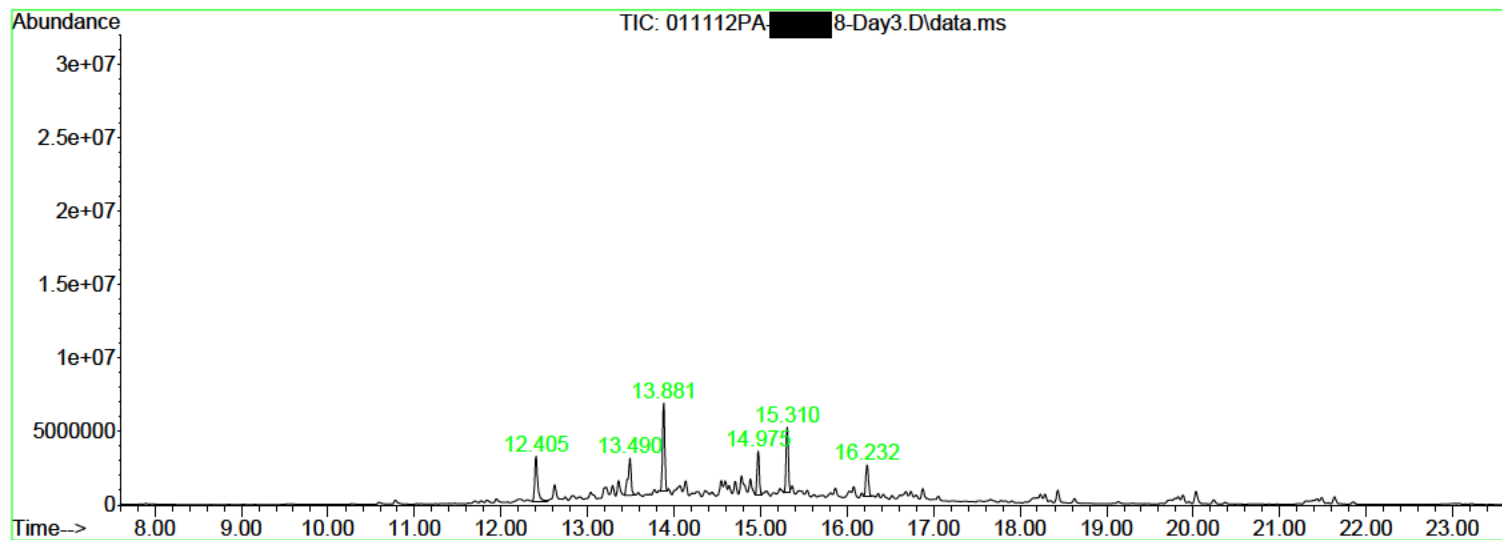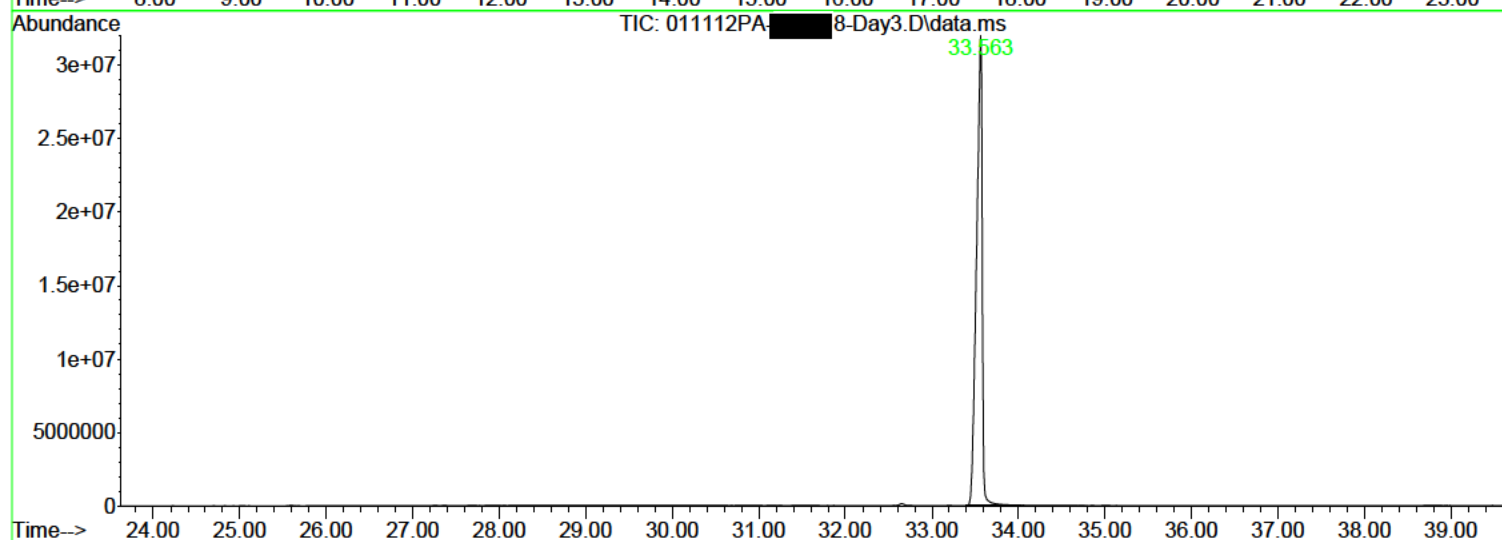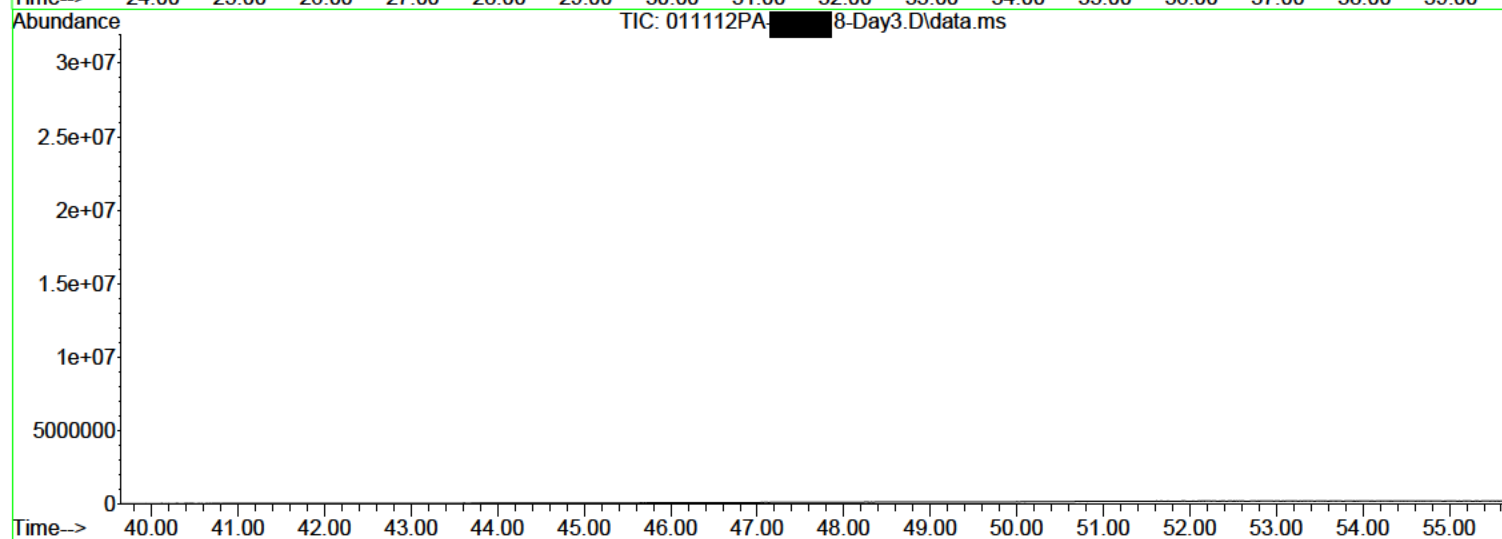

Data Path : C:\msdchem\1\LEGACY\2012\January\  
Data File : 011112PA-8-Day3.D  
Acq On : 11 Jan 2012 10:55  
Operator :  
Sample : PA-Blaker8-Day3  
Misc : 1.0 uL PA-8-Day3 at 1 mL dilute 1/10  
ALS Vial : 59 Sample Multiplier: 1

Quant Method : C:\msdchem\1\METHODS\TLTICPAH.M  
Quant Title : PAH5437

TIC Library : C:\Database\NIST08.L  
TIC Integration Parameters: rteint.p

\*\*\*\*\*  
Peak Number 1 Dodecane Concentration Rank 4

| R.T.   | EstConc   | Area    | Relative to ISTD  | R.T.  |
|--------|-----------|---------|-------------------|-------|
| 12.405 | 710.61 ng | 7106120 | External Standard | 0.000 |

| Hit# | of        | 5 | Tentative ID | MW  | MolForm | CAS#        | Qual |
|------|-----------|---|--------------|-----|---------|-------------|------|
| 1    | Dodecane  |   |              | 170 | C12H26  | 000112-40-3 | 97   |
| 2    | Dodecane  |   |              | 170 | C12H26  | 000112-40-3 | 95   |
| 3    | Dodecane  |   |              | 170 | C12H26  | 000112-40-3 | 91   |
| 4    | Dodecane  |   |              | 170 | C12H26  | 000112-40-3 | 90   |
| 5    | Tridecane |   |              | 184 | C13H28  | 000629-50-5 | 86   |

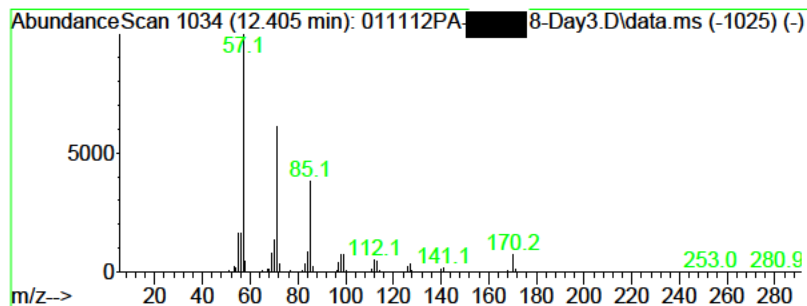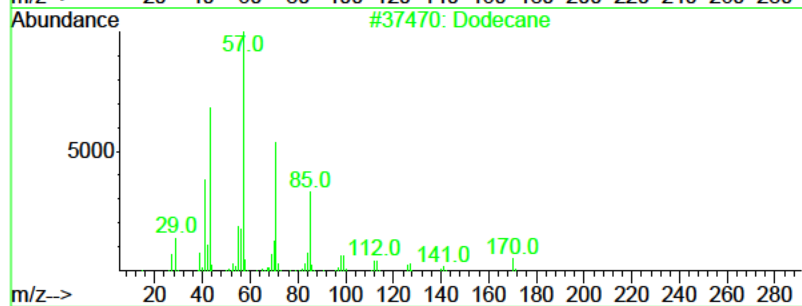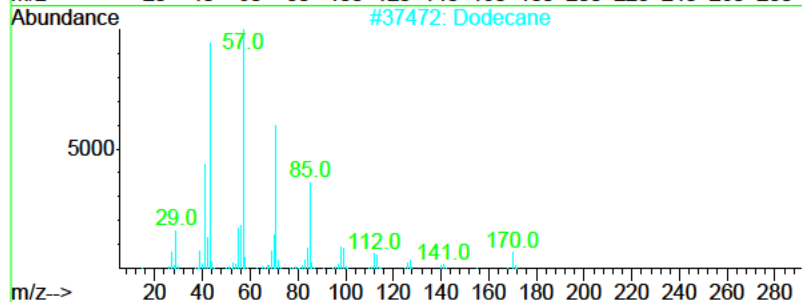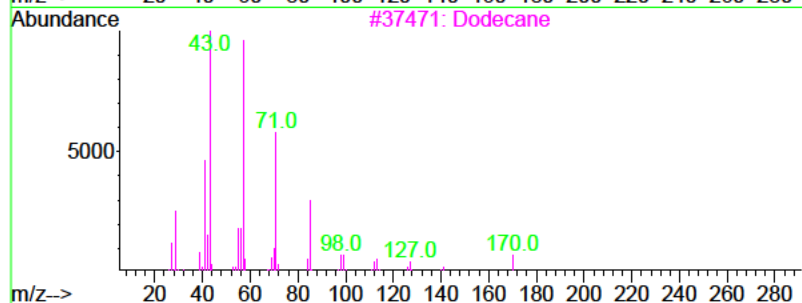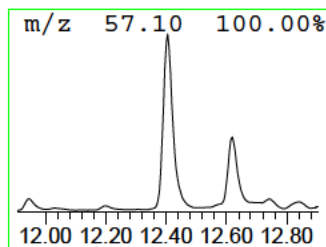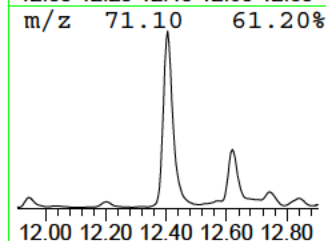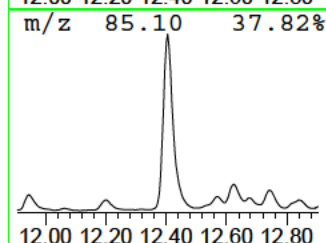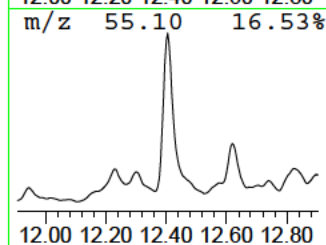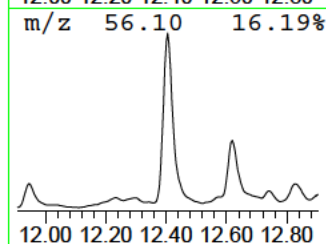

Data Path : C:\msdchem\1\LEGACY\2012\January\  
Data File : 011112PA-8-Day3.D  
Acq On : 11 Jan 2012 10:55  
Operator :  
Sample : PA-Blaker8-Day3  
Misc : 1.0 uL PA-8-Day3 at 1 mL dilute 1/10  
ALS Vial : 59 Sample Multiplier: 1

Quant Method : C:\msdchem\1\METHODS\TLTICPAH.M  
Quant Title : PAH5437

TIC Library : C:\Database\NIST08.L  
TIC Integration Parameters: rteint.p

\*\*\*\*\*  
Peak Number 2 Tridecane, 7-methyl- Concentration Rank 5

| R.T.   | EstConc   | Area    | Relative to ISTD  | R.T.  |
|--------|-----------|---------|-------------------|-------|
| 13.490 | 657.85 ng | 6578450 | External Standard | 0.000 |

| Hit# | of | 5 | Tentative ID            | MW  | MolForm | CAS#        | Qual |
|------|----|---|-------------------------|-----|---------|-------------|------|
| 1    |    |   | Tridecane, 7-methyl-    | 198 | C14H30  | 026730-14-3 | 90   |
| 2    |    |   | Octane, 2,6-dimethyl-   | 142 | C10H22  | 002051-30-1 | 87   |
| 3    |    |   | Nonane, 3-methyl-       | 142 | C10H22  | 005911-04-6 | 83   |
| 4    |    |   | Undecane, 6,6-dimethyl- | 184 | C13H28  | 017312-76-4 | 72   |
| 5    |    |   | Octane, 3,6-dimethyl-   | 142 | C10H22  | 015869-94-0 | 72   |

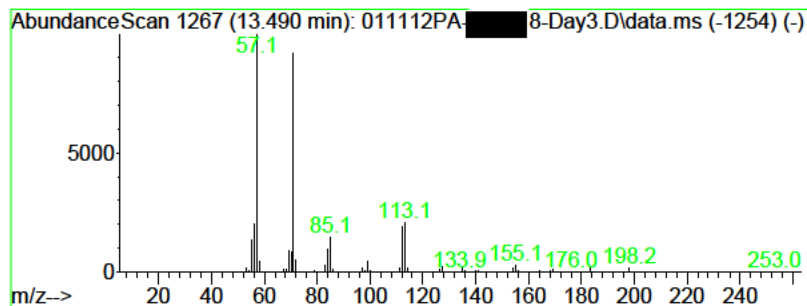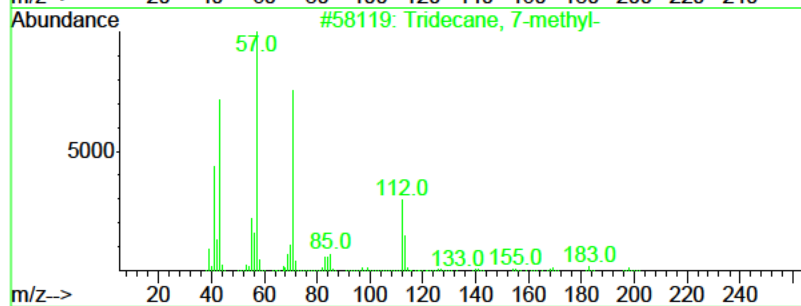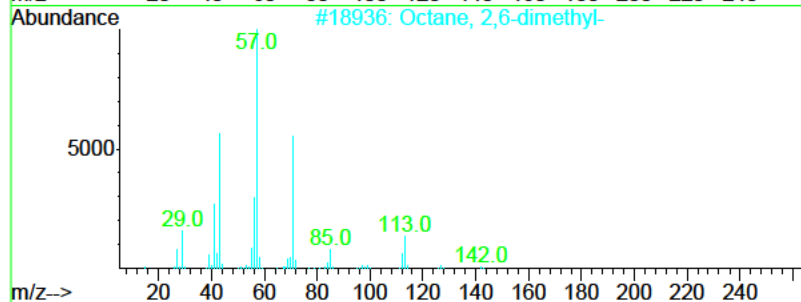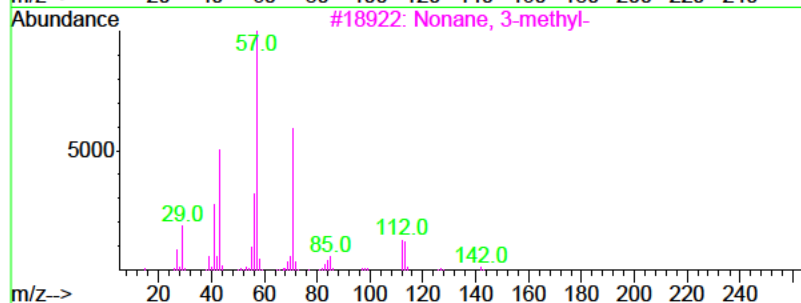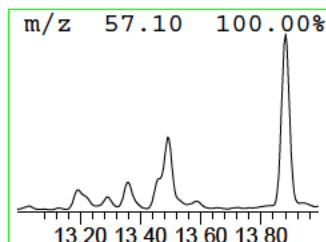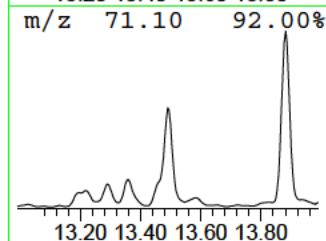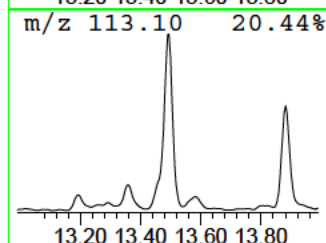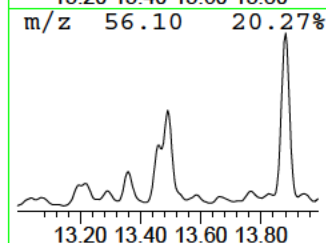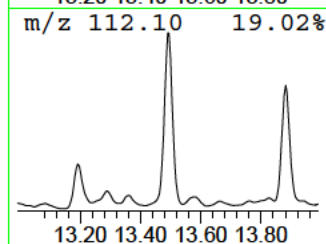

Data Path : C:\msdchem\1\LEGACY\2012\January\  
Data File : 011112PA-8-Day3.D  
Acq On : 11 Jan 2012 10:55  
Operator :  
Sample : PA-Blaker8-Day3  
Misc : 1.0 uL PA-8-Day3 at 1 mL dilute 1/10  
ALS Vial : 59 Sample Multiplier: 1

Quant Method : C:\msdchem\1\METHODS\TLTICPAH.M  
Quant Title : PAH5437

TIC Library : C:\Database\NIST08.L  
TIC Integration Parameters: rteint.p

\*\*\*\*\*  
Peak Number 3 Tridecane Concentration Rank 2

| R.T.   | EstConc    | Area     | Relative to ISTD  | R.T.  |
|--------|------------|----------|-------------------|-------|
| 13.881 | 1088.60 ng | 10886000 | External Standard | 0.000 |

| Hit# | of | 5 | Tentative ID | MW  | MolForm | CAS#        | Qual |
|------|----|---|--------------|-----|---------|-------------|------|
| 1    |    |   | Tridecane    | 184 | C13H28  | 000629-50-5 | 97   |
| 2    |    |   | Tridecane    | 184 | C13H28  | 000629-50-5 | 96   |
| 3    |    |   | Tridecane    | 184 | C13H28  | 000629-50-5 | 93   |
| 4    |    |   | Tetradecane  | 198 | C14H30  | 000629-59-4 | 90   |
| 5    |    |   | Tridecane    | 184 | C13H28  | 000629-50-5 | 90   |

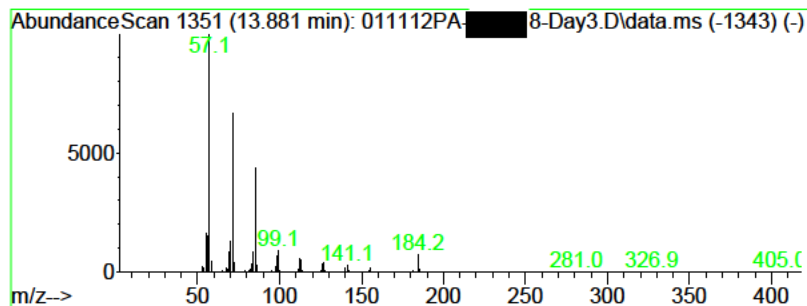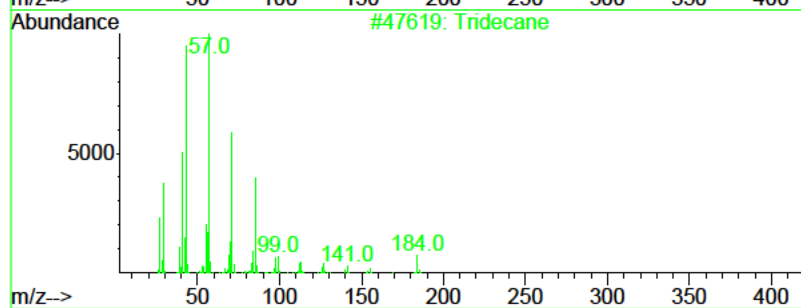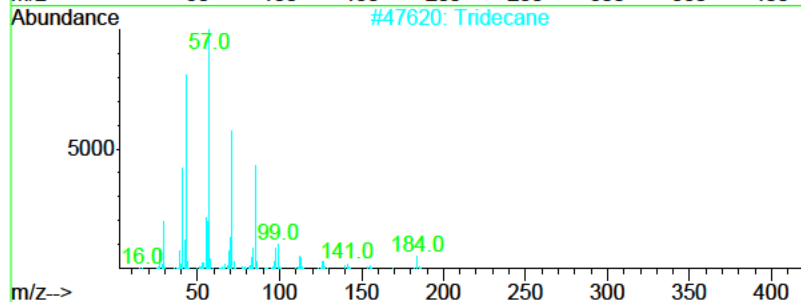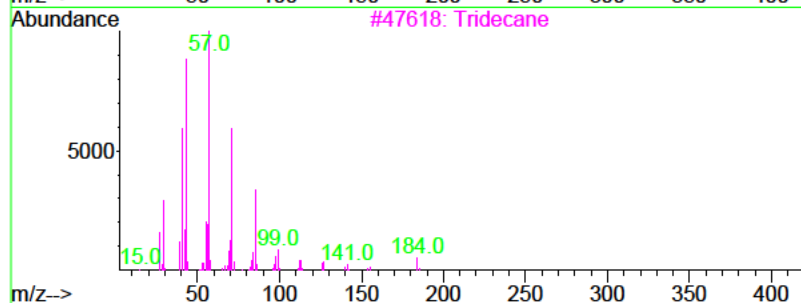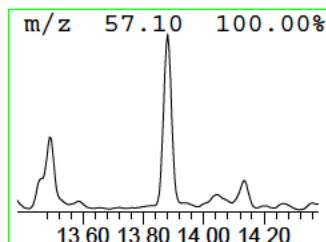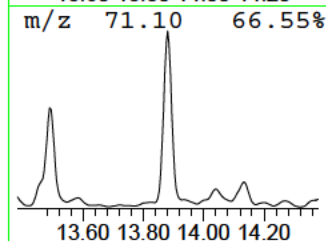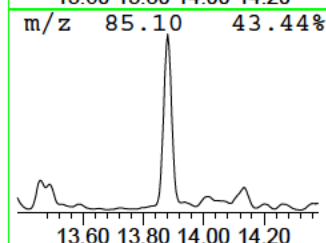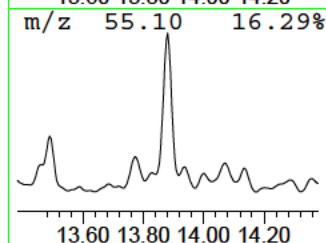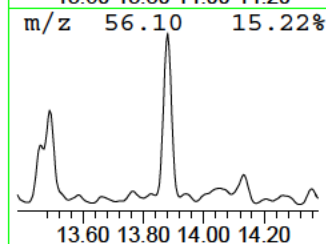

Data Path : C:\msdchem\1\LEGACY\2012\January\  
Data File : 011112PA-8-Day3.D  
Acq On : 11 Jan 2012 10:55  
Operator :  
Sample : PA-Blaker8-Day3  
Misc : 1.0 uL PA-8-Day3 at 1 mL dilute 1/10  
ALS Vial : 59 Sample Multiplier: 1

Quant Method : C:\msdchem\1\METHODS\TLTICPAH.M  
Quant Title : PAH5437

TIC Library : C:\Database\NIST08.L  
TIC Integration Parameters: rteint.p

\*\*\*\*\*  
Peak Number 4 Dodecane, 2,6,10-trimethyl- Concentration Rank 6

| R.T.   | EstConc   | Area    | Relative to ISTD  | R.T.  |
|--------|-----------|---------|-------------------|-------|
| 14.975 | 536.66 ng | 5366630 | External Standard | 0.000 |

| Hit# | of | 5 | Tentative ID                | MW  | MolForm  | CAS#        | Qual |
|------|----|---|-----------------------------|-----|----------|-------------|------|
| 1    |    |   | Dodecane, 2,6,10-trimethyl- | 212 | C15H32   | 003891-98-3 | 74   |
| 2    |    |   | Tetradecane, 4-methyl-      | 212 | C15H32   | 025117-24-2 | 72   |
| 3    |    |   | Decane, 5-propyl-           | 184 | C13H28   | 017312-62-8 | 72   |
| 4    |    |   | Bacchotricuneatin c         | 342 | C20H22O5 | 066563-30-2 | 64   |
| 5    |    |   | Dodecane, 2,6,10-trimethyl- | 212 | C15H32   | 003891-98-3 | 64   |

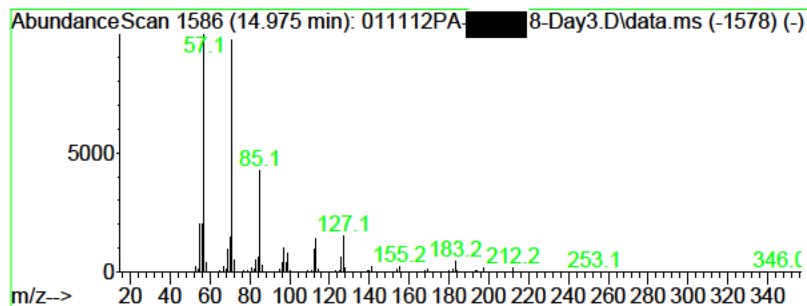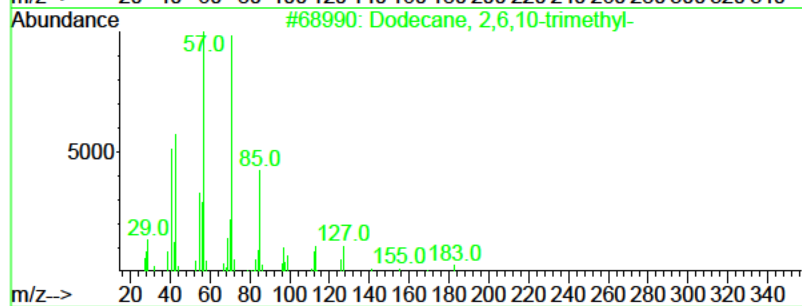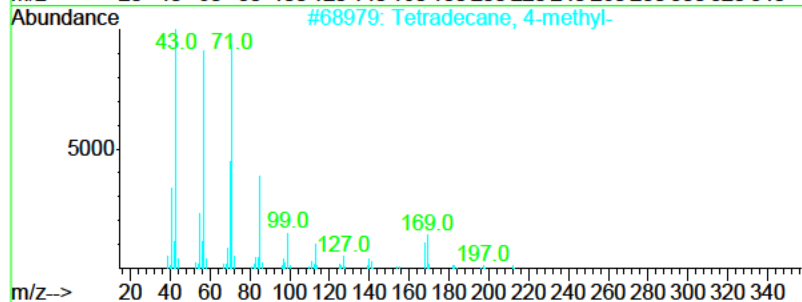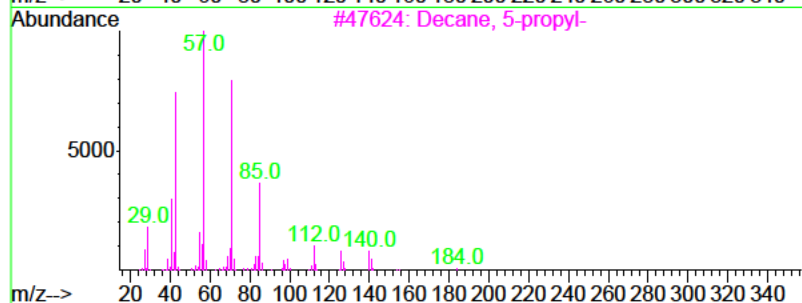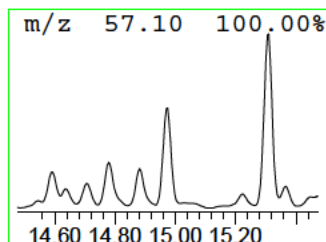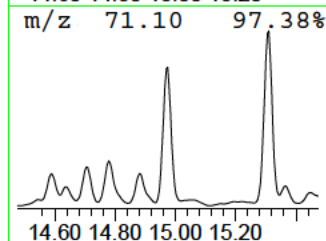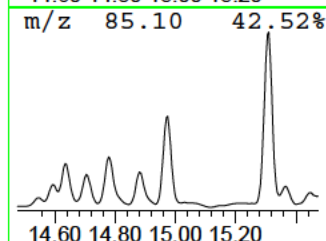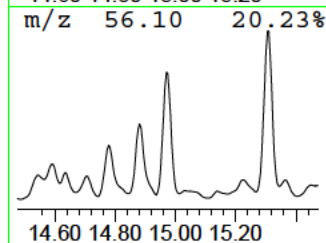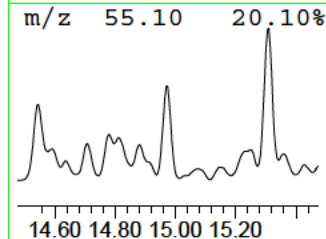

Data Path : C:\msdchem\1\LEGACY\2012\January\  
Data File : 011112PA-8-Day3.D  
Acq On : 11 Jan 2012 10:55  
Operator :  
Sample : PA-Blaker8-Day3  
Misc : 1.0 uL PA-8-Day3 at 1 mL dilute 1/10  
ALS Vial : 59 Sample Multiplier: 1

Quant Method : C:\msdchem\1\METHODS\TLTICPAH.M  
Quant Title : PAH5437

TIC Library : C:\Database\NIST08.L  
TIC Integration Parameters: rteint.p

\*\*\*\*\*  
Peak Number 5 Tetradecane Concentration Rank 3

| R.T.   | EstConc   | Area    | Relative to ISTD  | R.T.  |
|--------|-----------|---------|-------------------|-------|
| 15.310 | 832.15 ng | 8321470 | External Standard | 0.000 |

| Hit# | of | 5 | Tentative ID | MW  | MolForm | CAS#        | Qual |
|------|----|---|--------------|-----|---------|-------------|------|
| 1    |    |   | Tetradecane  | 198 | C14H30  | 000629-59-4 | 97   |
| 2    |    |   | Tetradecane  | 198 | C14H30  | 000629-59-4 | 96   |
| 3    |    |   | Tetradecane  | 198 | C14H30  | 000629-59-4 | 95   |
| 4    |    |   | Tetradecane  | 198 | C14H30  | 000629-59-4 | 93   |
| 5    |    |   | Hexadecane   | 226 | C16H34  | 000544-76-3 | 90   |

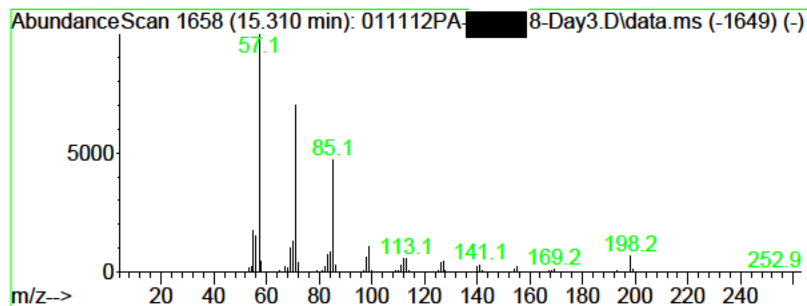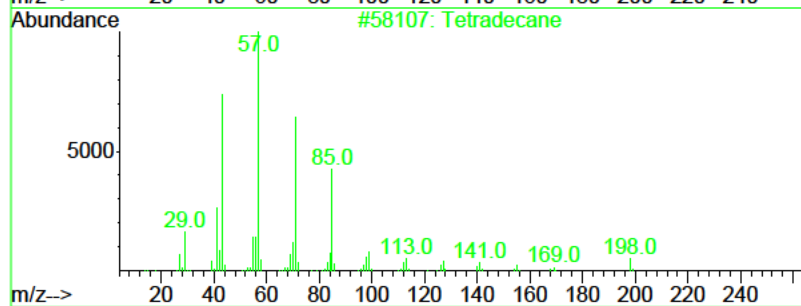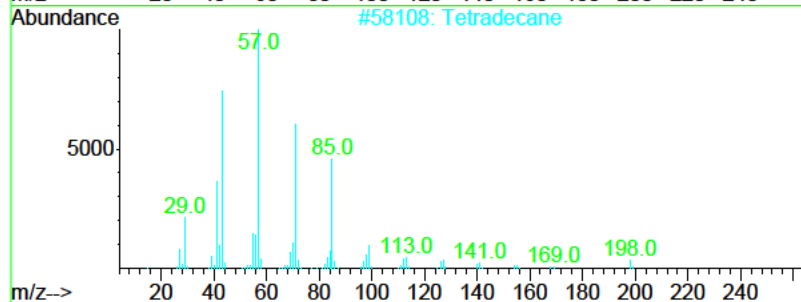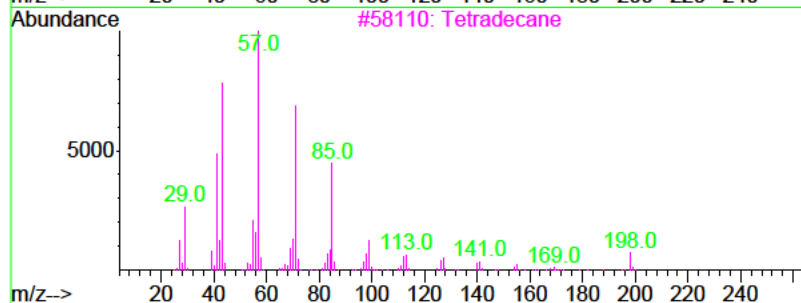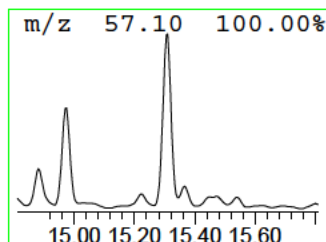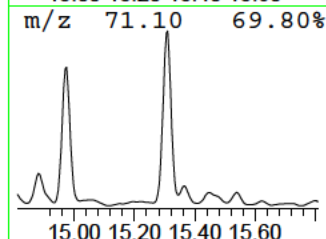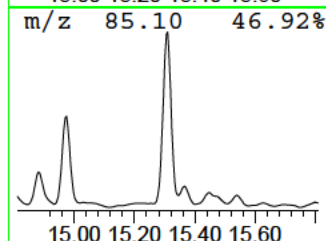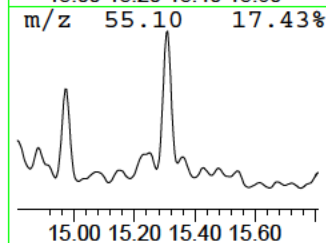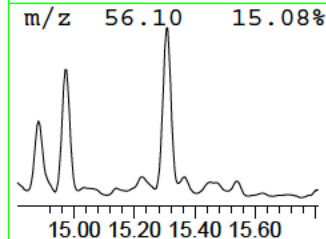

Data Path : C:\msdchem\1\LEGACY\2012\January\  
Data File : 011112PA-8-Day3.D  
Acq On : 11 Jan 2012 10:55  
Operator :  
Sample : PA-Blaker8-Day3  
Misc : 1.0 uL PA-8-Day3 at 1 mL dilute 1/10  
ALS Vial : 59 Sample Multiplier: 1

Quant Method : C:\msdchem\1\METHODS\TLTICPAH.M  
Quant Title : PAH5437

TIC Library : C:\Database\NIST08.L  
TIC Integration Parameters: rteint.p

\*\*\*\*\*  
Peak Number 6 Hexadecane Concentration Rank 7

| R.T.   | EstConc   | Area    | Relative to ISTD  | R.T.  |
|--------|-----------|---------|-------------------|-------|
| 16.232 | 458.09 ng | 4580870 | External Standard | 0.000 |

| Hit# | of | 5 | Tentative ID                        | MW  | MolForm | CAS#        | Qual |
|------|----|---|-------------------------------------|-----|---------|-------------|------|
| 1    |    |   | Hexadecane                          | 226 | C16H34  | 000544-76-3 | 93   |
| 2    |    |   | Heptadecane, 2,6,10,14-tetramethyl- | 296 | C21H44  | 018344-37-1 | 90   |
| 3    |    |   | Dodecane, 2,6,11-trimethyl-         | 212 | C15H32  | 031295-56-4 | 86   |
| 4    |    |   | Pentadecane, 4-methyl-              | 226 | C16H34  | 002801-87-8 | 81   |
| 5    |    |   | Decane, 2,3,7-trimethyl-            | 184 | C13H28  | 062238-13-5 | 80   |

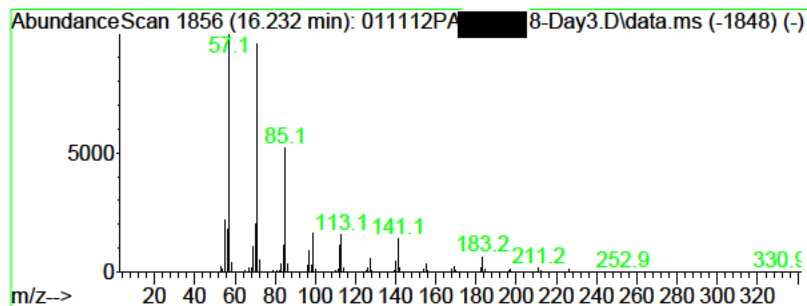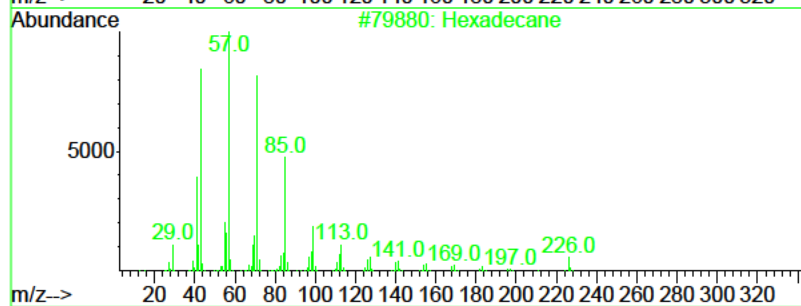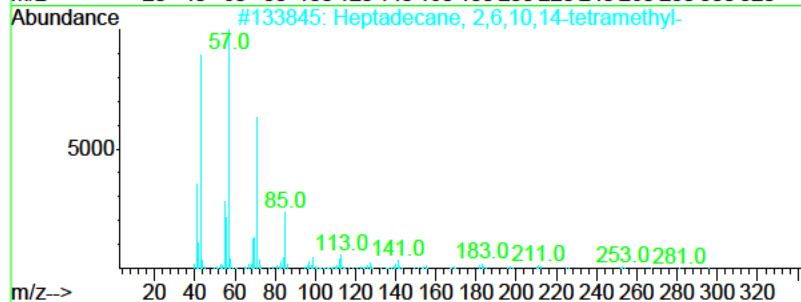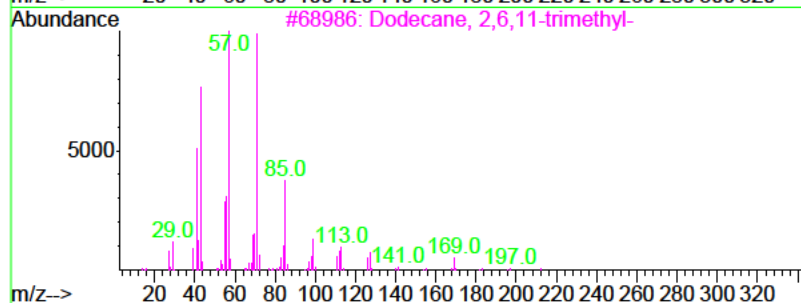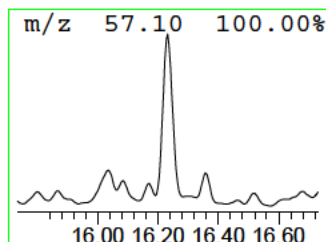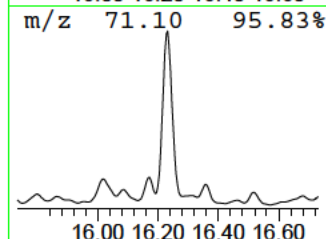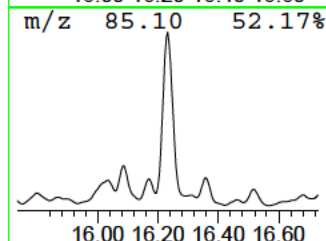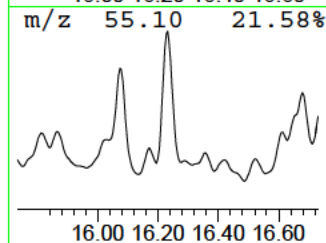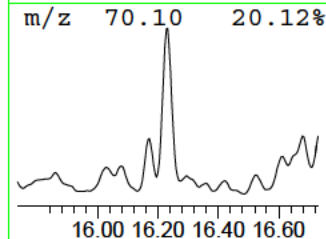

Data Path : C:\msdchem\1\LEGACY\2012\January\  
Data File : 011112PA- 8-Day3.D  
Acq On : 11 Jan 2012 10:55  
Operator :  
Sample : PA-Blaker8-Day3  
Misc : 1.0 uL PA- 8-Day3 at 1 mL dilute 1/10  
ALS Vial : 59 Sample Multiplier: 1

Quant Method : C:\msdchem\1\METHODS\TLTICPAH.M  
Quant Title : PAH5437

TIC Library : C:\Database\NIST08.L  
TIC Integration Parameters: rteint.p

\*\*\*\*\*  
Peak Number 7 1,2-Benzenedicarboxylic aci... Concentration Rank 1

| R.T.   | EstConc     | Area      | Relative to ISTD  | R.T.  |
|--------|-------------|-----------|-------------------|-------|
| 33.563 | 14704.20 ng | 147042000 | External Standard | 0.000 |

| Hit# | of | 5 | Tentative ID                        | MW  | MolForm  | CAS#        | Qual |
|------|----|---|-------------------------------------|-----|----------|-------------|------|
| 1    |    |   | 1,2-Benzenedicarboxylic acid, di... | 390 | C24H38O4 | 027554-26-3 | 91   |
| 2    |    |   | Bis(2-ethylhexyl) phthalate         | 390 | C24H38O4 | 000117-81-7 | 91   |
| 3    |    |   | Bis(2-ethylhexyl) phthalate         | 390 | C24H38O4 | 000117-81-7 | 90   |
| 4    |    |   | 1,2-Benzenedicarboxylic acid, di... | 390 | C24H38O4 | 027554-26-3 | 90   |
| 5    |    |   | 1,2-Benzenedicarboxylic acid, mo... | 278 | C16H22O4 | 004376-20-9 | 83   |

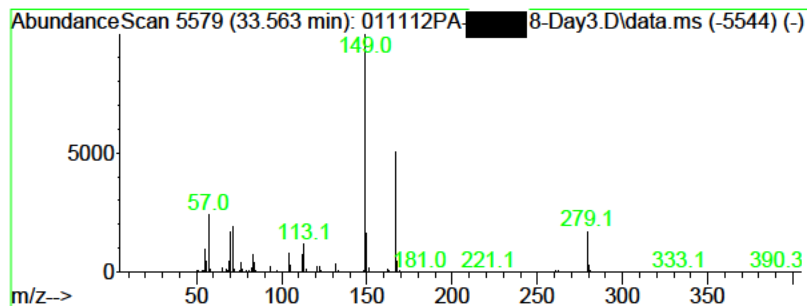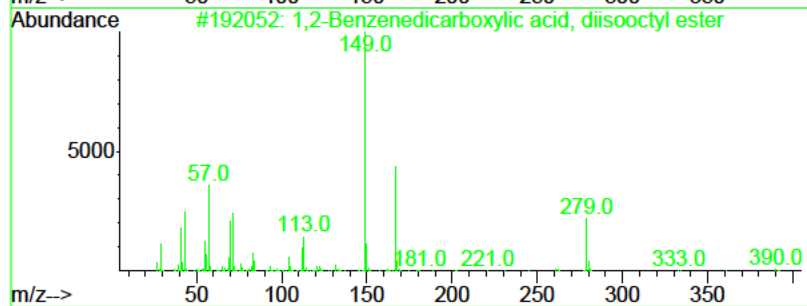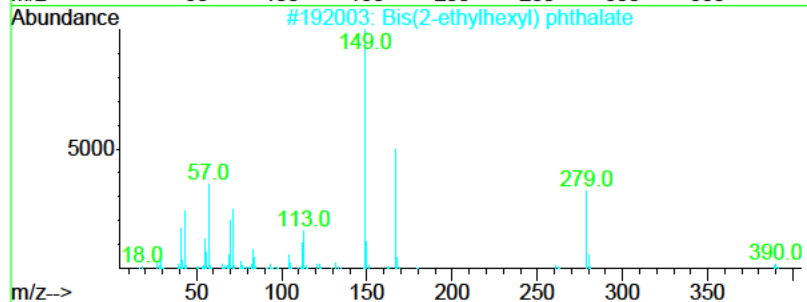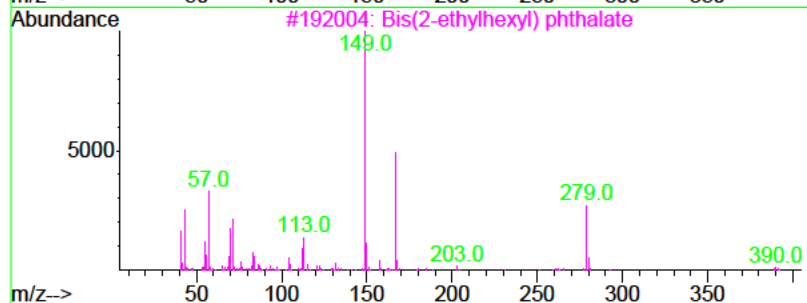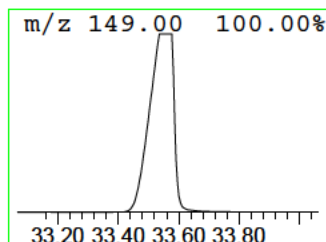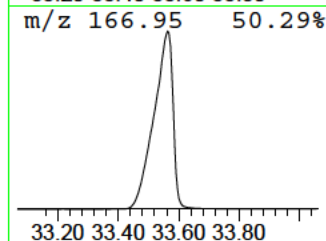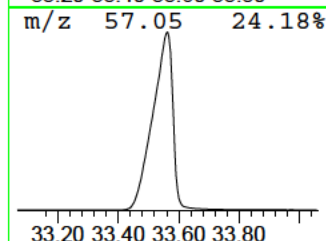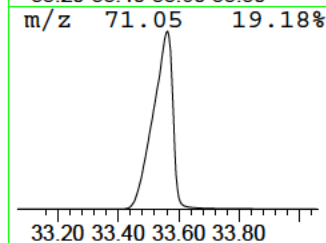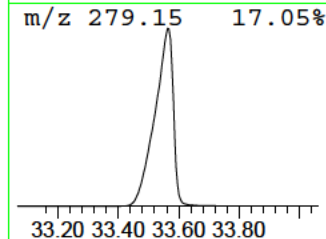

Data Path : C:\msdchem\1\LEGACY\2012\January\  
 Data File : 011112PA-8-Day3.D  
 Acq On : 11 Jan 2012 10:55  
 Operator :  
 Sample : PA-Blaker8-Day3  
 Misc : 1.0 uL PA-8-Day3 at 1 mL dilute 1/10  
 ALS Vial : 59 Sample Multiplier: 1

Quant Method : C:\msdchem\1\METHODS\TLTICPAH.M  
 Quant Title : PAH5437

TIC Library : C:\Database\NIST08.L  
 TIC Integration Parameters: rteint.p

| TIC Top Hit name   | RT     | EstConc | Units | Response  | --Internal Standard--- |       |       |      |
|--------------------|--------|---------|-------|-----------|------------------------|-------|-------|------|
|                    |        |         |       |           | #                      | RT    | Resp  | Conc |
| Dodecane           | 12.405 | 710.6   | ng    | 7106120   | 0                      | 0.000 | 10000 | 1.0  |
| Tridecane, 7-me... | 13.490 | 657.8   | ng    | 6578450   | 0                      | 0.000 | 10000 | 1.0  |
| Tridecane          | 13.881 | 1088.6  | ng    | 10886000  | 0                      | 0.000 | 10000 | 1.0  |
| Dodecane, 2,6,1... | 14.975 | 536.7   | ng    | 5366630   | 0                      | 0.000 | 10000 | 1.0  |
| Tetradecane        | 15.310 | 832.1   | ng    | 8321470   | 0                      | 0.000 | 10000 | 1.0  |
| Hexadecane         | 16.232 | 458.1   | ng    | 4580870   | 0                      | 0.000 | 10000 | 1.0  |
| 1,2-Benzenedica... | 33.563 | 14704.2 | ng    | 147042000 | 0                      | 0.000 | 10000 | 1.0  |
