# Supplementary material
Source: publisher figshare collection journal article supplement (https://wiley.figshare.com/articles/dataset/_/6176210)
Supplement: Supplementary file 15 [file 1]

Data Path : C:\msdchem\1\LEGACY\2012\February\  
Data File : 020312PA--Day8-1mL.D  
Acq On : 3 Feb 2012 8:54  
Operator :  
Sample : PA--Day8-1mL  
Misc : 1 uL PA--Day8 at 1 mL  
ALS Vial : 92 Sample Multiplier: 1

Integration Parameters: rteint.p

Integrator: RTE

Smoothing : ON

Sampling : 1

Start Thrs: 0.2

Stop Thrs : 0

Filtering: 5

Min Area: 3 % of largest Peak

Max Peaks: 100

Peak Location: TOP

If leading or trailing edge < 100 prefer < Baseline drop else tangent >

Peak separation: 5

Method : C:\msdchem\1\METHODS\TLTICPAH.M

Title : PAH5437

Signal : TIC: 020312PA--Day8-1mL.D\data.ms

| peak<br># | R.T.<br>min | first<br>scan | max<br>scan | last<br>scan | PK<br>TY | peak<br>height | corr.<br>area | corr.<br>% max. | % of<br>total |
|-----------|-------------|---------------|-------------|--------------|----------|----------------|---------------|-----------------|---------------|
| 1         | 9.524       | 406           | 415         | 463          | rVB2     | 1145754        | 4739530       | 3.58%           | 2.770%        |
| 2         | 11.791      | 861           | 902         | 919          | rBV      | 20826975       | 132509108     | 100.00%         | 77.448%       |
| 3         | 14.877      | 1542          | 1565        | 1580         | rVV      | 2021923        | 8443355       | 6.37%           | 4.935%        |
| 4         | 17.777      | 2168          | 2188        | 2228         | rBV2     | 1014701        | 6108890       | 4.61%           | 3.570%        |
| 5         | 33.489      | 5541          | 5563        | 5597         | rBV      | 5424423        | 19294170      | 14.56%          | 11.277%       |

Sum of corrected areas: 171095053

Data Path : C:\msdchem\1\LEGACY\2012\February\  
Data File : 020312PA-Day8-1mL.D  
Acq On : 3 Feb 2012 8:54  
Operator :  
Sample : PA- 8-Day8-1mL  
Misc : 1 uL PA--Day8 at 1 mL  
ALS Vial : 92 Sample Multiplier: 1

Quant Method : C:\msdchem\1\METHODS\TLTICPAH.M  
Quant Title : PAH5437

TIC Library : C:\Database\NIST08.L  
TIC Integration Parameters: rteint.p

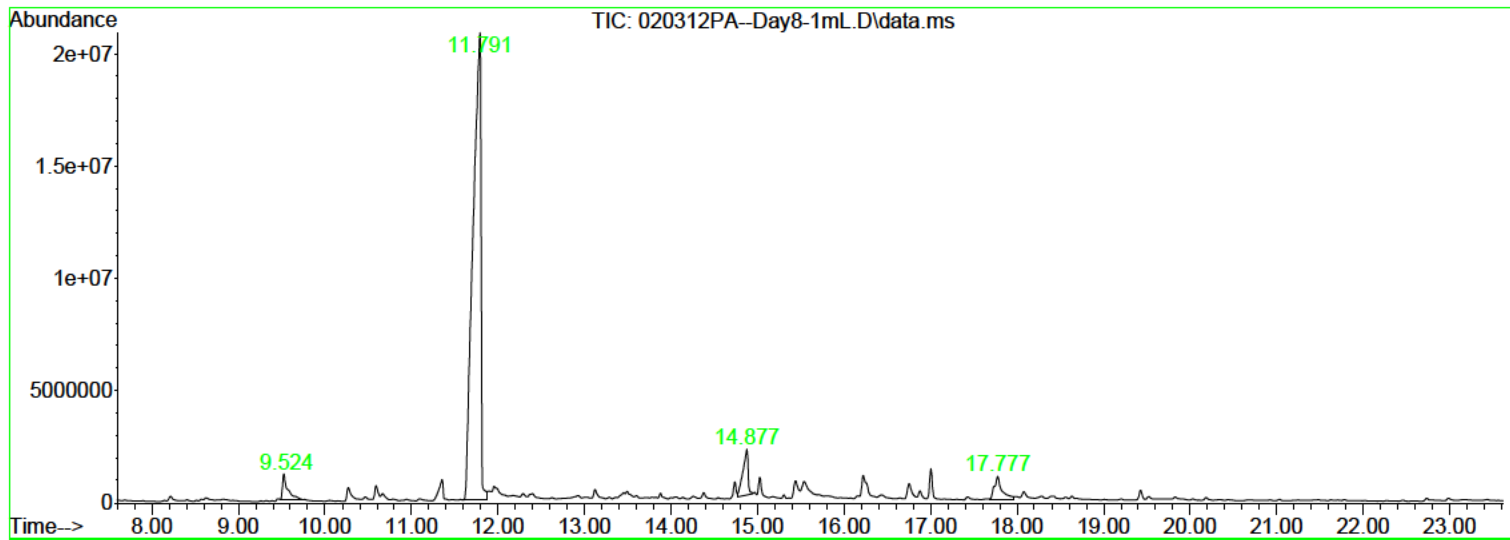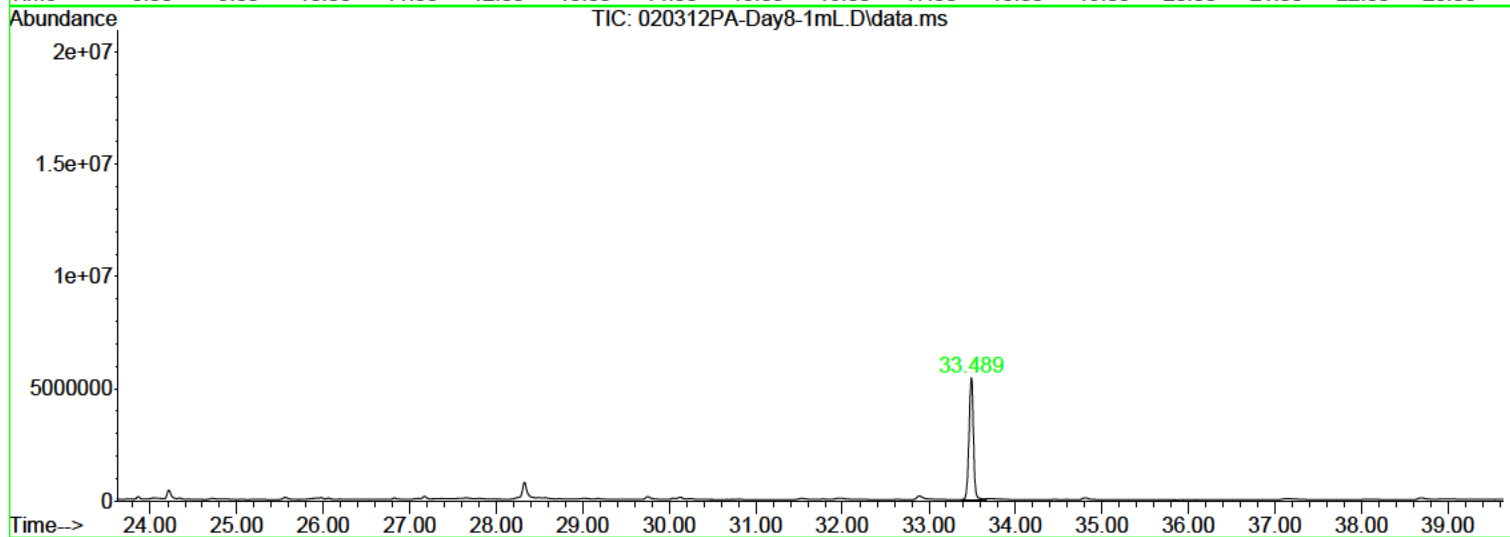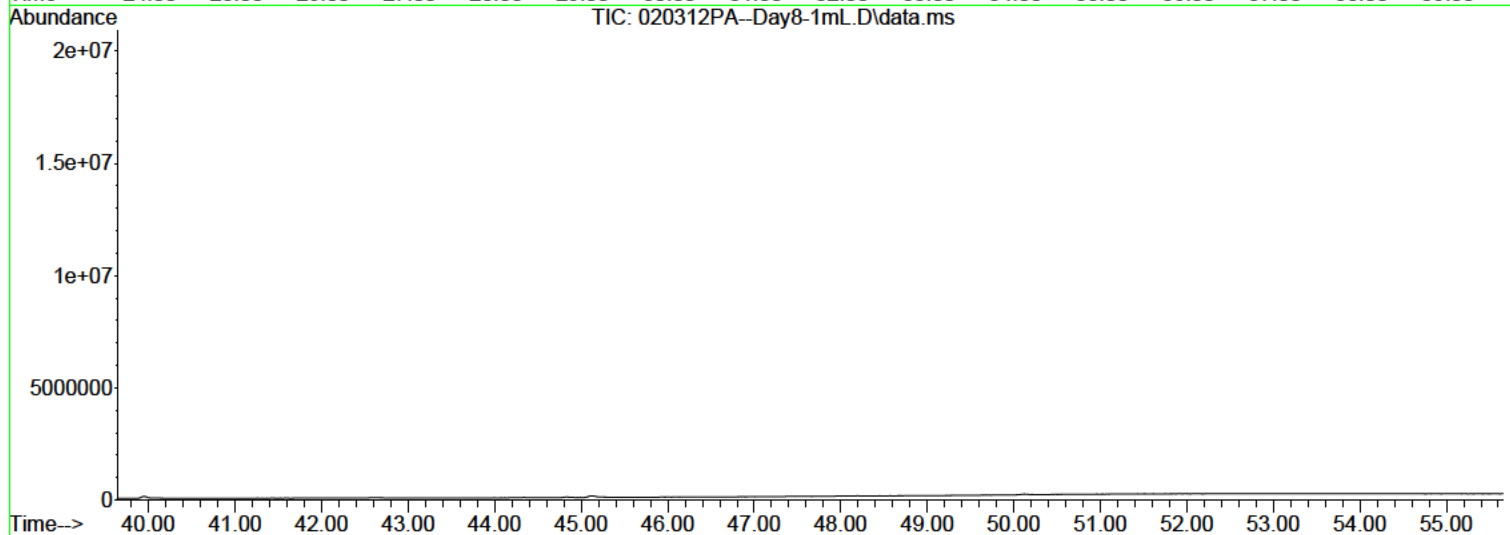

Data Path : C:\msdchem\1\LEGACY\2012\February\  
Data File : 020312PA--Day8-1mL.D  
Acq On : 3 Feb 2012 8:54  
Operator :  
Sample : PA--Day8-1mL  
Misc : 1 uL PA-Day8 at 1 mL  
ALS Vial : 92 Sample Multiplier: 1

Quant Method : C:\msdchem\1\METHODS\TLTICPAH.M  
Quant Title : PAH5437

TIC Library : C:\Database\NIST08.L  
TIC Integration Parameters: rteint.p

\*\*\*\*\*  
Peak Number 1 1-Hexanol, 2-ethyl- Concentration Rank 5

| R.T.  | EstConc   | Area    | Relative to ISTD  | R.T.  |
|-------|-----------|---------|-------------------|-------|
| 9.524 | 473.95 ng | 4739530 | External Standard | 0.000 |

| Hit# | of | 5 | Tentative ID                        | MW  | MolForm    | CAS#        | Qual |
|------|----|---|-------------------------------------|-----|------------|-------------|------|
| 1    |    |   | 1-Hexanol, 2-ethyl-                 | 130 | C8H18O     | 000104-76-7 | 83   |
| 2    |    |   | 1-Hexanol, 2-ethyl-                 | 130 | C8H18O     | 000104-76-7 | 83   |
| 3    |    |   | 1-Hexanol, 2-ethyl-                 | 130 | C8H18O     | 000104-76-7 | 83   |
| 4    |    |   | 1-Hexanol, 2-ethyl-                 | 130 | C8H18O     | 000104-76-7 | 78   |
| 5    |    |   | Chloroacetic acid, 2-ethylhexyl ... | 206 | C10H19ClO2 | 005345-58-4 | 59   |

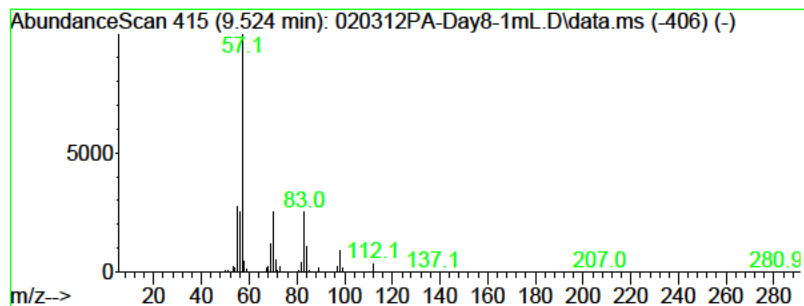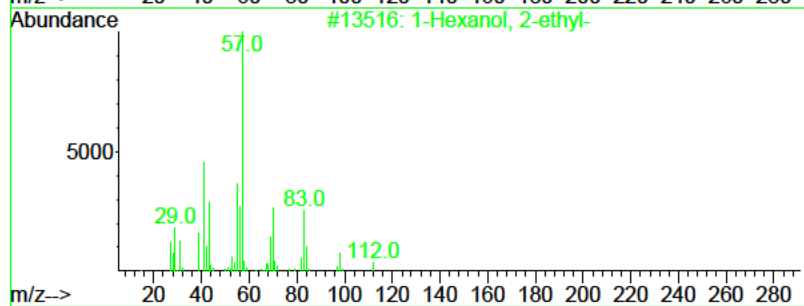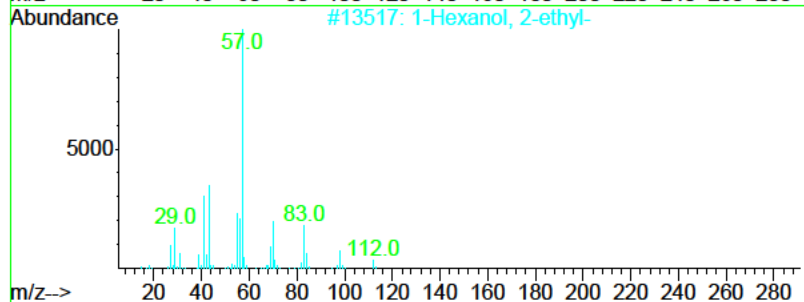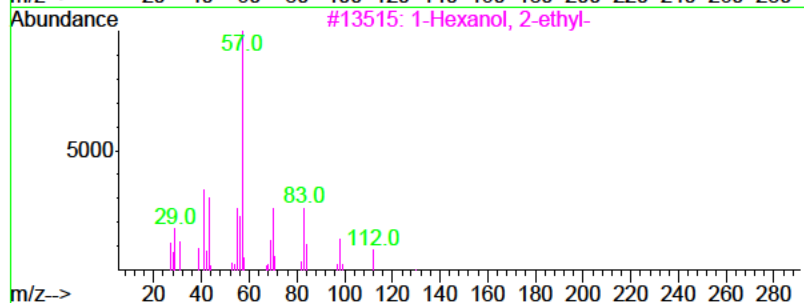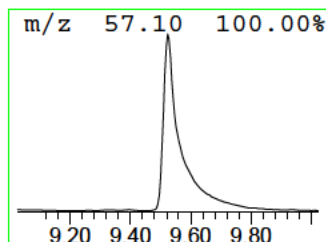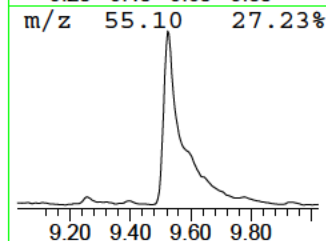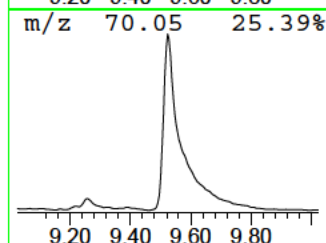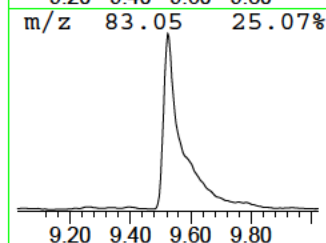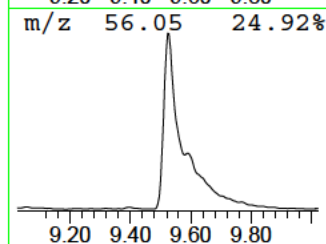

Data Path : C:\msdchem\1\LEGACY\2012\February\  
Data File : 020312PA--Day8-1mL.D  
Acq On : 3 Feb 2012 8:54  
Operator :  
Sample : PA- 8-Day8-1mL  
Misc : 1 uL PA--Day8 at 1 mL  
ALS Vial : 92 Sample Multiplier: 1

Quant Method : C:\msdchem\1\METHODS\TLTICPAH.M  
Quant Title : PAH5437

TIC Library : C:\Database\NIST08.L  
TIC Integration Parameters: rteint.p

\*\*\*\*\*  
Peak Number 2 1,3-Pentanediol, 2,2,4-trim... Concentration Rank 1

| R.T.   | EstConc     | Area      | Relative to ISTD  | R.T.  |
|--------|-------------|-----------|-------------------|-------|
| 11.791 | 13250.90 ng | 132509000 | External Standard | 0.000 |

  

| Hit# | of 5 | Tentative ID                      | MW  | MolForm | CAS#        | Qual |
|------|------|-----------------------------------|-----|---------|-------------|------|
| 1    |      | 1,3-Pentanediol, 2,2,4-trimethyl- | 146 | C8H18O2 | 000144-19-4 | 90   |
| 2    |      | 1,3-Pentanediol, 2,2,4-trimethyl- | 146 | C8H18O2 | 000144-19-4 | 78   |
| 3    |      | 1,3-Pentanediol, 2,2,4-trimethyl- | 146 | C8H18O2 | 000144-19-4 | 50   |
| 4    |      | 1-Hexene, 5-methyl-               | 98  | C7H14   | 003524-73-0 | 25   |
| 5    |      | Decane, 5-methyl-6-methylene-     | 168 | C12H24  | 075029-95-7 | 23   |

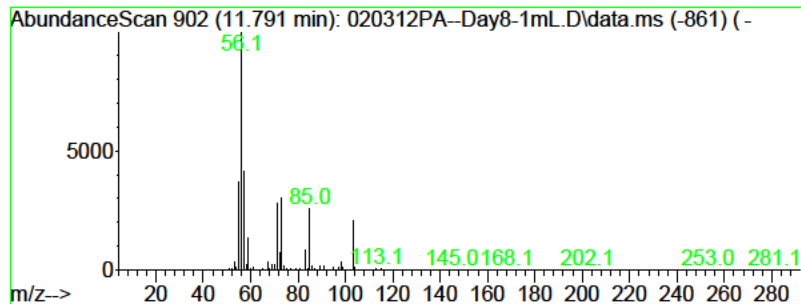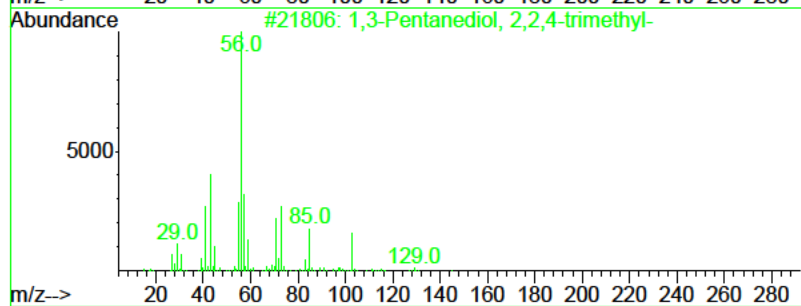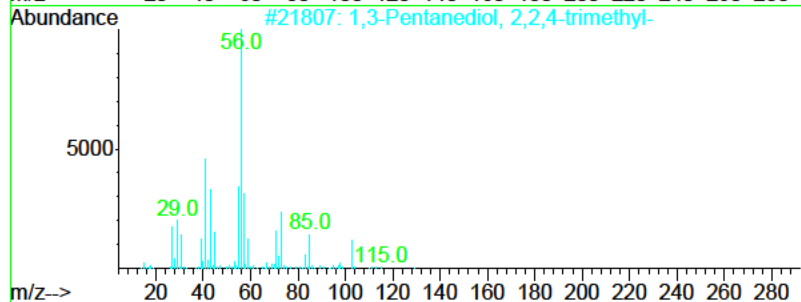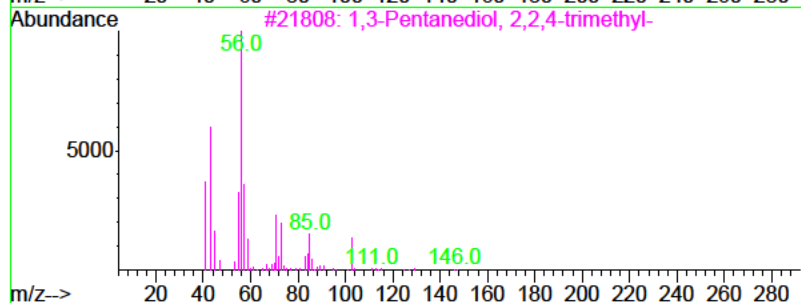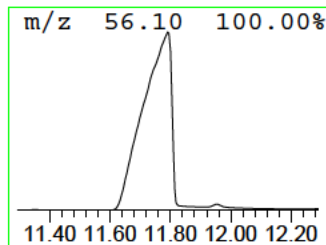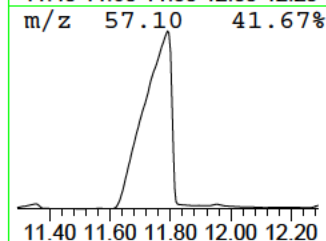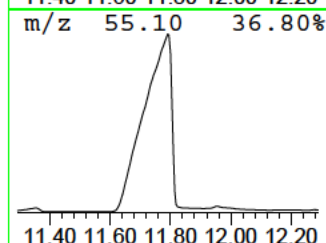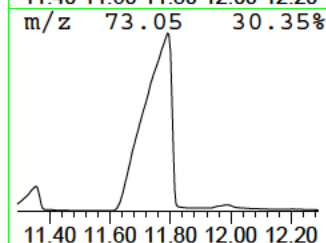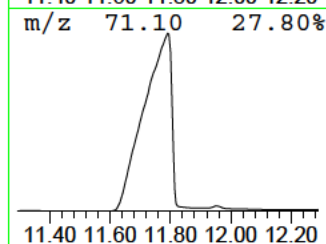

Data Path : C:\msdchem\1\LEGACY\2012\February\  
Data File : 020312PA--Day8-1mL.D  
Acq On : 3 Feb 2012 8:54  
Operator :  
Sample : PA--Day8-1mL  
Misc : 1 uL PA-B-Day8 at 1 mL  
ALS Vial : 92 Sample Multiplier: 1

Quant Method : C:\msdchem\1\METHODS\TLTICPAH.M  
Quant Title : PAH5437

TIC Library : C:\Database\NIST08.L  
TIC Integration Parameters: rteint.p

\*\*\*\*\*  
Peak Number 3 n-Decanoic acid Concentration Rank 3

| R.T.   | EstConc   | Area    | Relative to ISTD  | R.T.  |
|--------|-----------|---------|-------------------|-------|
| 14.877 | 844.34 ng | 8443360 | External Standard | 0.000 |

| Hit# | of | 5 | Tentative ID                        | MW  | MolForm  | CAS#        | Qual |
|------|----|---|-------------------------------------|-----|----------|-------------|------|
| 1    |    |   | n-Decanoic acid                     | 172 | C10H20O2 | 000334-48-5 | 97   |
| 2    |    |   | n-Decanoic acid                     | 172 | C10H20O2 | 000334-48-5 | 87   |
| 3    |    |   | n-Decanoic acid                     | 172 | C10H20O2 | 000334-48-5 | 81   |
| 4    |    |   | n-Decanoic acid                     | 172 | C10H20O2 | 000334-48-5 | 70   |
| 5    |    |   | Ethanone, 1-(4,5-dihydro-2-thiaz... | 129 | C5H7NOS  | 029926-41-8 | 52   |

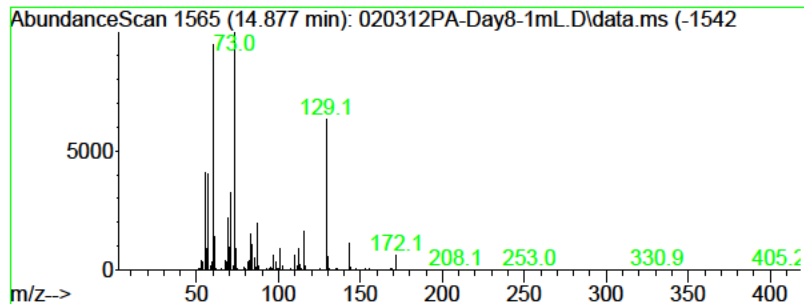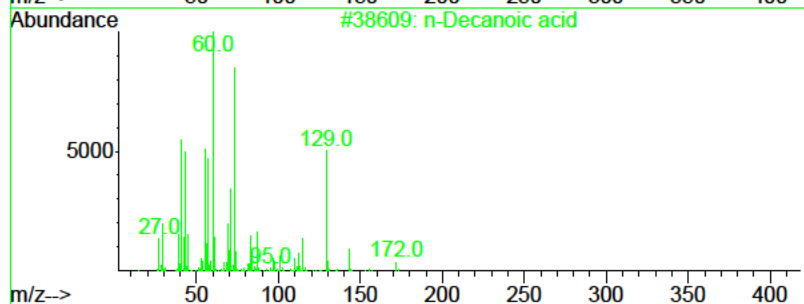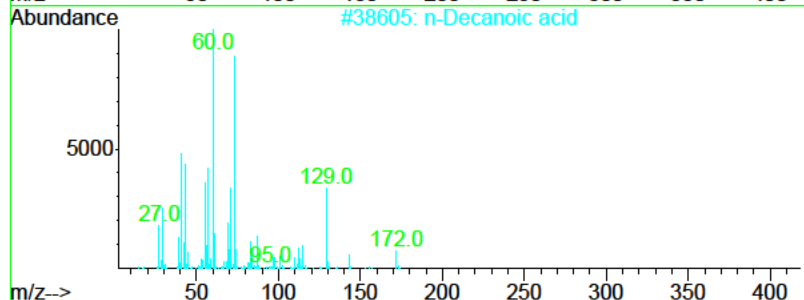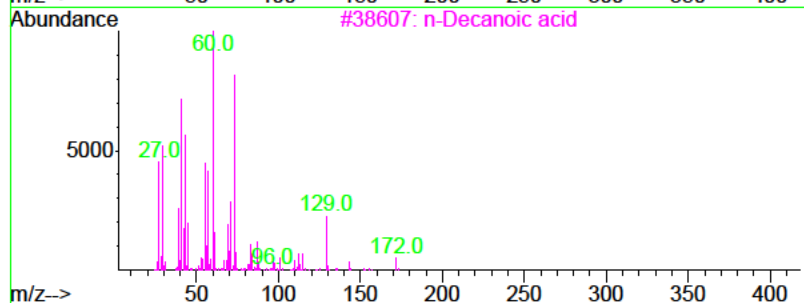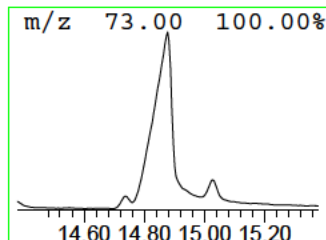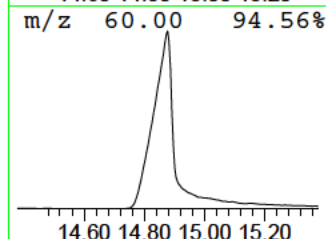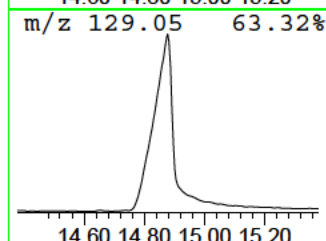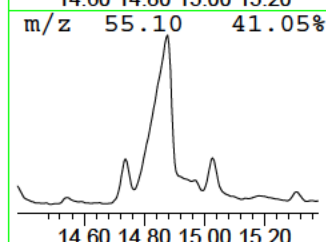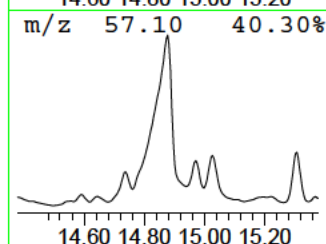

Data Path : C:\msdchem\1\LEGACY\2012\February\  
Data File : 020312PA--Day8-1mL.D  
Acq On : 3 Feb 2012 8:54  
Operator :  
Sample : PA--Day8-1mL  
Misc : 1 uL PA--Day8 at 1 mL  
ALS Vial : 92 Sample Multiplier: 1

Quant Method : C:\msdchem\1\METHODS\TLTICPAH.M  
Quant Title : PAH5437

TIC Library : C:\Database\NIST08.L  
TIC Integration Parameters: rteint.p

\*\*\*\*\*  
Peak Number 4 Dodecanoic acid Concentration Rank 4

| R.T.   | EstConc   | Area    | Relative to ISTD  | R.T.  |
|--------|-----------|---------|-------------------|-------|
| 17.777 | 610.89 ng | 6108890 | External Standard | 0.000 |

| Hit# | of | 5 | Tentative ID     | MW  | MolForm  | CAS#        | Qual |
|------|----|---|------------------|-----|----------|-------------|------|
| 1    |    |   | Dodecanoic acid  | 200 | C12H24O2 | 000143-07-7 | 99   |
| 2    |    |   | Dodecanoic acid  | 200 | C12H24O2 | 000143-07-7 | 98   |
| 3    |    |   | Dodecanoic acid  | 200 | C12H24O2 | 000143-07-7 | 93   |
| 4    |    |   | Dodecanoic acid  | 200 | C12H24O2 | 000143-07-7 | 70   |
| 5    |    |   | Tridecanoic acid | 214 | C13H26O2 | 000638-53-9 | 64   |

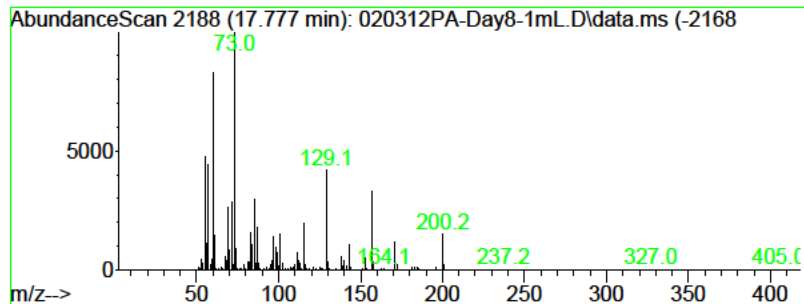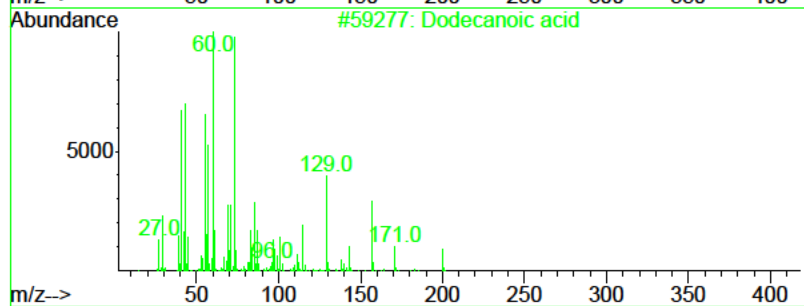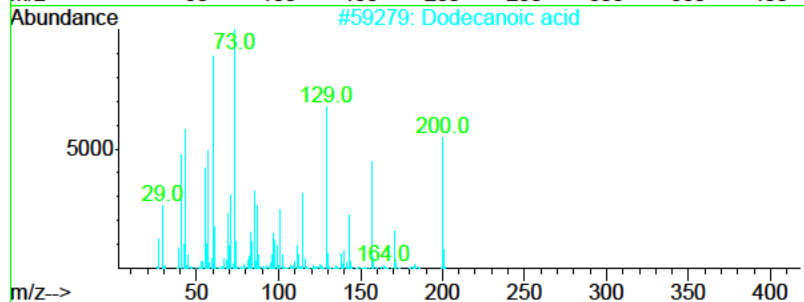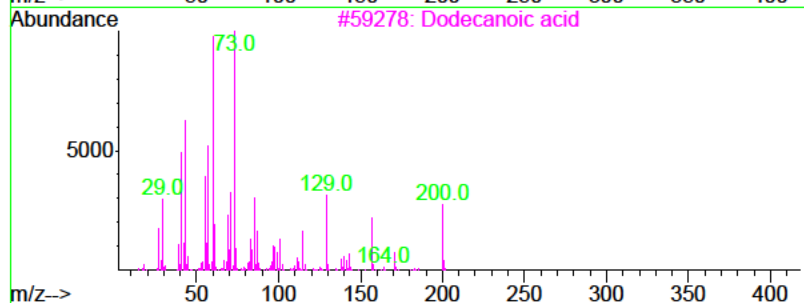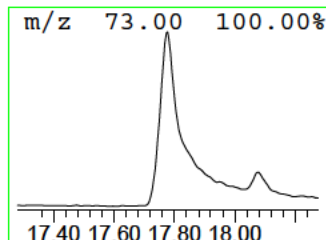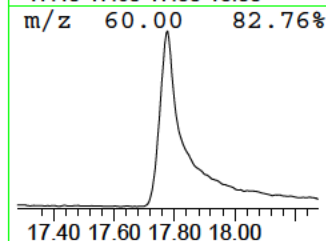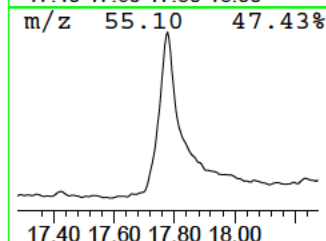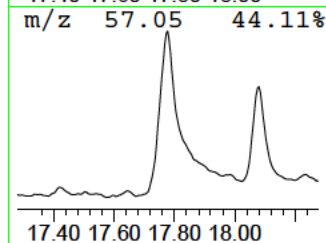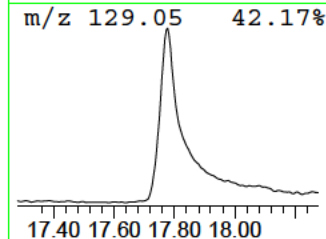

Data Path : C:\msdchem\1\LEGACY\2012\February\  
Data File : 020312PA--Day8-1mL.D  
Acq On : 3 Feb 2012 8:54  
Operator :  
Sample : PA- 8-Day8-1mL  
Misc : 1 uL PA--Day8 at 1 mL  
ALS Vial : 92 Sample Multiplier: 1

Quant Method : C:\msdchem\1\METHODS\TLTICPAH.M  
Quant Title : PAH5437

TIC Library : C:\Database\NIST08.L  
TIC Integration Parameters: rteint.p

\*\*\*\*\*  
Peak Number 5 1,2-Benzenedicarboxylic aci... Concentration Rank 2

| R.T.   | EstConc    | Area     | Relative to ISTD  | R.T.  |
|--------|------------|----------|-------------------|-------|
| 33.489 | 1929.42 ng | 19294200 | External Standard | 0.000 |

| Hit# | of | Tentative ID                        | MW  | MolForm  | CAS#         | Qual |
|------|----|-------------------------------------|-----|----------|--------------|------|
| 1    | 5  | 1,2-Benzenedicarboxylic acid, di... | 390 | C24H38O4 | 027554-26-3  | 91   |
| 2    |    | 1,2-Benzenedicarboxylic acid, mo... | 278 | C16H22O4 | 004376-20-9  | 91   |
| 3    |    | Phthalic acid, 6-ethyloct-3-yl 2... | 418 | C26H42O4 | 1000315-53-8 | 86   |
| 4    |    | 1,2-Benzenedicarboxylic acid, di... | 390 | C24H38O4 | 027554-26-3  | 76   |
| 5    |    | Phthalic acid, neopentyl 2-penty... | 306 | C18H26O4 | 1000315-54-0 | 59   |

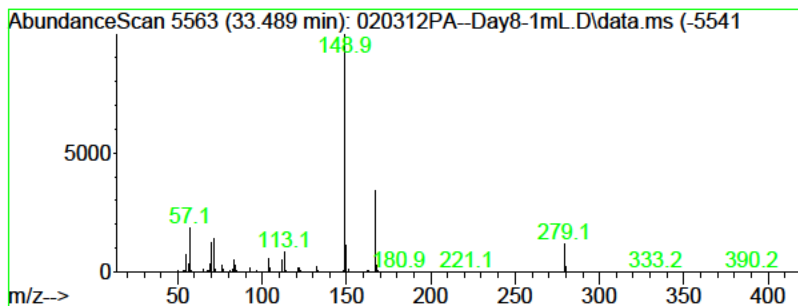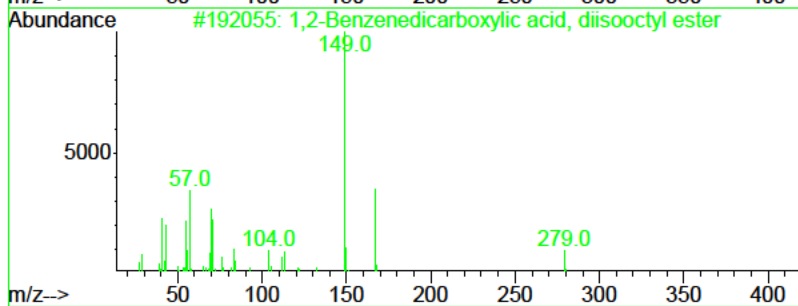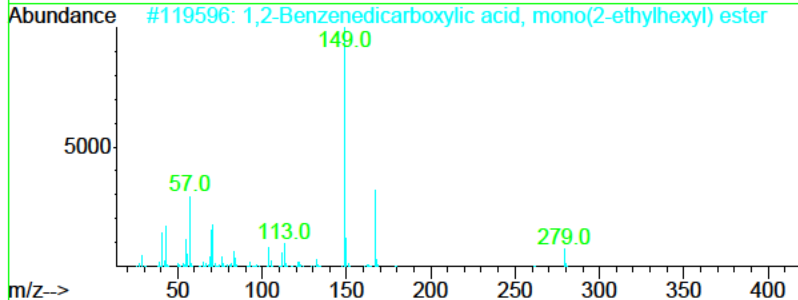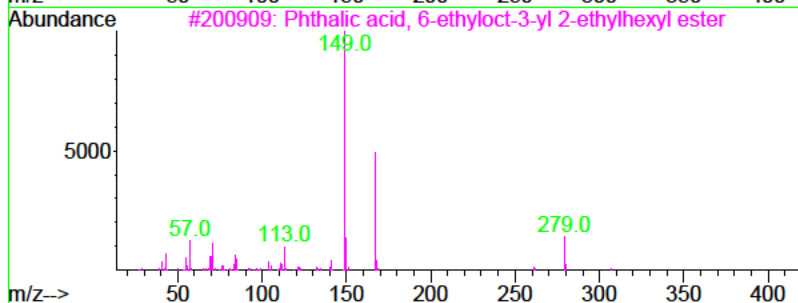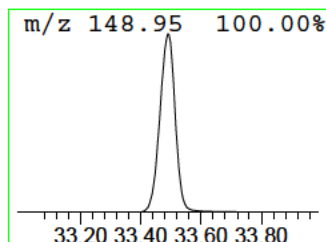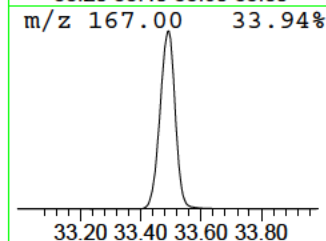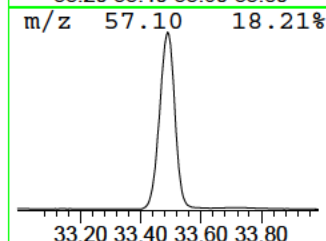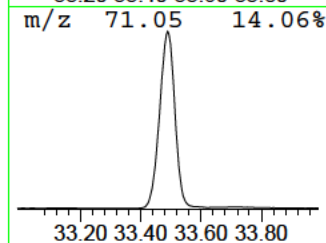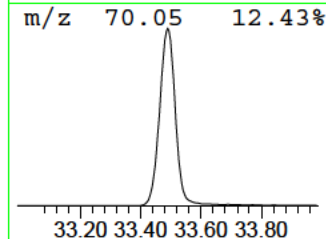

Data Path : C:\msdchem\1\LEGACY\2012\February\  
Data File : 020318-Day8-1mL.D  
Acq On : 3 Feb 2012 8:54  
Operator :  
Sample : PA--Day8-1mL  
Misc : 1 uL PA--Day8 at 1 mL  
ALS Vial : 92 Sample Multiplier: 1

Quant Method : C:\msdchem\1\METHODS\TLTICPAH.M  
Quant Title : PAH5437

TIC Library : C:\Database\NIST08.L  
TIC Integration Parameters: rteint.p

| TIC Top Hit name   | RT     | EstConc | Units | Response  | --Internal Standard--- |       |       |      |
|--------------------|--------|---------|-------|-----------|------------------------|-------|-------|------|
|                    |        |         |       |           | #                      | RT    | Resp  | Conc |
| 1-Hexanol, 2-et... | 9.524  | 474.0   | ng    | 4739530   | 0                      | 0.000 | 10000 | 1.0  |
| 1,3-Pentanediol... | 11.791 | 13250.9 | ng    | 132509000 | 0                      | 0.000 | 10000 | 1.0  |
| n-Decanoic acid    | 14.877 | 844.3   | ng    | 8443360   | 0                      | 0.000 | 10000 | 1.0  |
| Dodecanoic acid    | 17.777 | 610.9   | ng    | 6108890   | 0                      | 0.000 | 10000 | 1.0  |
| 1,2-Benzenedica... | 33.489 | 1929.4  | ng    | 19294200  | 0                      | 0.000 | 10000 | 1.0  |
