# Supplementary material
Source: publisher figshare collection journal article supplement (https://wiley.figshare.com/articles/dataset/_/6176210)
Supplement: Supplementary file 16 [file 1]

Data Path : C:\msdchem\1\LEGACY\2012\February\  
 Data File : 022912PA--dilute1000.D  
 Acq On : 29 Feb 2012 10:00  
 Operator :  
 Sample : PA--dilute1000  
 Misc : 1.0 uL 4 mL dilute1000  
 ALS Vial : 55 Sample Multiplier: 1

Integration Parameters: rteint.p

Integrator: RTE

Smoothing : ON

Sampling : 1

Start Thrs: 0.2

Stop Thrs : 0

Filtering: 5

Min Area: 3 % of largest Peak

Max Peaks: 100

Peak Location: TOP

If leading or trailing edge < 100 prefer < Baseline drop else tangent >

Peak separation: 5

Method : C:\msdchem\1\METHODS\TLTICPAH.M

Title : PAH5437

Signal : TIC: 022912PA--dilute1000.D\data.ms

| peak<br># | R.T.<br>min | first<br>scan | max<br>scan | last<br>scan | PK<br>TY | peak<br>height | corr.<br>area | corr.<br>% max. | % of<br>total |
|-----------|-------------|---------------|-------------|--------------|----------|----------------|---------------|-----------------|---------------|
| 1         | 8.029       | 81            | 94          | 107          | rBV5     | 282139         | 1023596       | 3.39%           | 0.282%        |
| 2         | 8.169       | 108           | 124         | 129          | rBV2     | 673766         | 1811404       | 6.00%           | 0.500%        |
| 3         | 8.220       | 129           | 135         | 146          | rVB      | 579152         | 1278958       | 4.24%           | 0.353%        |
| 4         | 8.360       | 158           | 165         | 209          | rVB      | 886036         | 3442246       | 11.41%          | 0.950%        |
| 5         | 8.946       | 281           | 291         | 341          | rVV      | 4301605        | 15188591      | 50.33%          | 4.190%        |
| 6         | 9.384       | 379           | 385         | 400          | rBV      | 715215         | 1782347       | 5.91%           | 0.492%        |
| 7         | 9.486       | 401           | 407         | 420          | rVV      | 346906         | 941180        | 3.12%           | 0.260%        |
| 8         | 9.612       | 421           | 434         | 442          | rVV3     | 516099         | 1699101       | 5.63%           | 0.469%        |
| 9         | 9.686       | 444           | 450         | 477          | rVB4     | 482113         | 1984664       | 6.58%           | 0.547%        |
| 10        | 10.031      | 517           | 524         | 530          | rBV      | 1077072        | 2295820       | 7.61%           | 0.633%        |
| 11        | 10.087      | 531           | 536         | 544          | rVV      | 1237859        | 3104848       | 10.29%          | 0.856%        |
| 12        | 10.152      | 544           | 550         | 568          | rVV      | 1497007        | 4972071       | 16.47%          | 1.372%        |
| 13        | 10.268      | 568           | 575         | 598          | rVB      | 1380727        | 4026588       | 13.34%          | 1.111%        |
| 14        | 10.785      | 674           | 686         | 720          | rBV      | 10077903       | 30179560      | 100.00%         | 8.325%        |
| 15        | 11.078      | 741           | 749         | 763          | rVB3     | 682317         | 2064745       | 6.84%           | 0.570%        |
| 16        | 11.246      | 779           | 785         | 800          | rBV      | 551697         | 1519217       | 5.03%           | 0.419%        |
| 17        | 11.618      | 858           | 865         | 872          | rVV4     | 450449         | 1064477       | 3.53%           | 0.294%        |
| 18        | 11.707      | 873           | 884         | 892          | rVV4     | 1810077        | 5438418       | 18.02%          | 1.500%        |
| 19        | 11.772      | 892           | 898         | 906          | rVV      | 1341887        | 3167484       | 10.50%          | 0.874%        |
| 20        | 11.837      | 906           | 912         | 928          | rVV      | 1696636        | 4572433       | 15.15%          | 1.261%        |
| 21        | 11.949      | 928           | 936         | 950          | rVV      | 1601406        | 3622047       | 12.00%          | 0.999%        |
| 22        | 12.233      | 988           | 997         | 1005         | rBV      | 435058         | 1033256       | 3.42%           | 0.285%        |
| 23        | 12.410      | 1024          | 1035        | 1057         | rVB      | 12331880       | 28348710      | 93.93%          | 7.820%        |
| 24        | 12.624      | 1073          | 1081        | 1091         | rBV      | 2247673        | 4736938       | 15.70%          | 1.307%        |
| 25        | 12.745      | 1102          | 1107        | 1117         | rVB4     | 506281         | 1202398       | 3.98%           | 0.332%        |
| 26        | 13.038      | 1163          | 1170        | 1184         | rVB2     | 1012170        | 2432174       | 8.06%           | 0.671%        |
| 27        | 13.192      | 1196          | 1203        | 1206         | rBV2     | 1269310        | 2251896       | 7.46%           | 0.621%        |
| 28        | 13.290      | 1218          | 1224        | 1232         | rVB2     | 1014971        | 1955750       | 6.48%           | 0.540%        |
| 29        | 13.359      | 1232          | 1239        | 1249         | rBV      | 1503916        | 3066873       | 10.16%          | 0.846%        |
| 30        | 13.457      | 1250          | 1260        | 1263         | rBV3     | 1406328        | 2745308       | 9.10%           | 0.757%        |
| 31        | 13.881      | 1342          | 1351        | 1371         | rVB      | 11387568       | 22981541      | 76.15%          | 6.340%        |
| 32        | 14.137      | 1400          | 1406        | 1414         | rVB      | 792703         | 1704196       | 5.65%           | 0.470%        |
| 33        | 14.272      | 1428          | 1435        | 1446         | rVB7     | 315963         | 915855        | 3.03%           | 0.253%        |
| 34        | 14.384      | 1447          | 1459        | 1464         | rBV6     | 334183         | 1030458       | 3.41%           | 0.284%        |
| 35        | 14.546      | 1485          | 1494        | 1498         | rBV      | 1043997        | 2128397       | 7.05%           | 0.587%        |
| 36        | 14.593      | 1499          | 1504        | 1509         | rVV2     | 1113467        | 2307897       | 7.65%           | 0.637%        |
| 37        | 14.635      | 1510          | 1513        | 1521         | rVV      | 837219         | 1528259       | 5.06%           | 0.422%        |
| 38        | 14.705      | 1522          | 1528        | 1536         | rVV      | 944484         | 1898113       | 6.29%           | 0.524%        |
| 39        | 14.779      | 1537          | 1544        | 1557         | rVV      | 1288797        | 2879267       | 9.54%           | 0.794%        |
| 40        | 14.882      | 1558          | 1566        | 1578         | rVB      | 1116044        | 2405214       | 7.97%           | 0.663%        |

Data Path : C:\msdchem\1\LEGACY\2012\February\  
 Data File : 022912PA--dilute1000.D  
 Acq On : 29 Feb 2012 10:00  
 Operator :  
 Sample : PA--dilute1000  
 Misc : 1.0 uL 4 mL dilute1000  
 ALS Vial : 55 Sample Multiplier: 1

## Integration Parameters: rteint.p

Integrator: RTE  
 Smoothing : ON  
 Sampling : 1  
 Start Thrs: 0.2  
 Stop Thrs : 0

Filtering: 5  
 Min Area: 3 % of largest Peak  
 Max Peaks: 100  
 Peak Location: TOP

If leading or trailing edge < 100 prefer < Baseline drop else tangent >  
 Peak separation: 5

Method : C:\msdchem\1\METHODS\TLTICPAH.M  
 Title : PAH5437

|    |        |      |      |      |      |         |          |        |        |
|----|--------|------|------|------|------|---------|----------|--------|--------|
| 41 | 14.970 | 1578 | 1585 | 1594 | rBV  | 1329678 | 2497306  | 8.27%  | 0.689% |
| 42 | 15.310 | 1649 | 1658 | 1666 | rBV  | 9213559 | 17355459 | 57.51% | 4.788% |
| 43 | 15.538 | 1701 | 1707 | 1715 | rVB2 | 494250  | 1055732  | 3.50%  | 0.291% |
| 44 | 16.027 | 1800 | 1812 | 1817 | rBV4 | 729620  | 2261025  | 7.49%  | 0.624% |
| 45 | 16.078 | 1818 | 1823 | 1835 | rVV3 | 1158012 | 2589281  | 8.58%  | 0.714% |
| 46 | 16.166 | 1836 | 1842 | 1848 | rVV  | 646547  | 1294536  | 4.29%  | 0.357% |
| 47 | 16.232 | 1848 | 1856 | 1874 | rVV3 | 1802344 | 4987596  | 16.53% | 1.376% |
| 48 | 16.357 | 1876 | 1883 | 1898 | rVB  | 800815  | 1846502  | 6.12%  | 0.509% |
| 49 | 16.804 | 1968 | 1979 | 1995 | rVB  | 7875918 | 16072989 | 53.26% | 4.434% |
| 50 | 17.517 | 2124 | 2132 | 2145 | rBV5 | 711907  | 2507060  | 8.31%  | 0.692% |
| 51 | 17.666 | 2158 | 2164 | 2179 | rVB3 | 626829  | 2331518  | 7.73%  | 0.643% |
| 52 | 17.777 | 2180 | 2188 | 2195 | rBV  | 752357  | 1707333  | 5.66%  | 0.471% |
| 53 | 17.898 | 2207 | 2214 | 2224 | rVB  | 623754  | 1291960  | 4.28%  | 0.356% |
| 54 | 18.359 | 2302 | 2313 | 2346 | rBV  | 6139923 | 14757634 | 48.90% | 4.071% |
| 55 | 19.076 | 2458 | 2467 | 2471 | rBV3 | 592932  | 1382160  | 4.58%  | 0.381% |
| 56 | 19.132 | 2472 | 2479 | 2499 | rVB2 | 1131964 | 3827890  | 12.68% | 1.056% |
| 57 | 19.281 | 2505 | 2511 | 2523 | rBV4 | 364004  | 1256271  | 4.16%  | 0.347% |
| 58 | 19.360 | 2523 | 2528 | 2544 | rVB  | 508894  | 1160543  | 3.85%  | 0.320% |
| 59 | 19.490 | 2549 | 2556 | 2568 | rVB  | 483461  | 1086176  | 3.60%  | 0.300% |
| 60 | 19.956 | 2644 | 2656 | 2666 | rBV  | 5383030 | 12307887 | 40.78% | 3.395% |
| 61 | 20.049 | 2667 | 2676 | 2689 | rVB2 | 1506553 | 3840150  | 12.72% | 1.059% |
| 62 | 20.659 | 2795 | 2807 | 2826 | rBV6 | 629666  | 2941277  | 9.75%  | 0.811% |
| 63 | 20.785 | 2827 | 2834 | 2846 | rVV2 | 351466  | 992150   | 3.29%  | 0.274% |
| 64 | 20.971 | 2864 | 2874 | 2892 | rVB3 | 719472  | 1940452  | 6.43%  | 0.535% |
| 65 | 21.557 | 2989 | 3000 | 3011 | rVB  | 4528220 | 10349824 | 34.29% | 2.855% |
| 66 | 21.706 | 3023 | 3032 | 3042 | rBV  | 875350  | 2343955  | 7.77%  | 0.647% |
| 67 | 22.163 | 3120 | 3130 | 3138 | rBV  | 1313490 | 3725104  | 12.34% | 1.028% |
| 68 | 23.014 | 3302 | 3313 | 3329 | rVB4 | 347502  | 1404923  | 4.66%  | 0.388% |
| 69 | 23.140 | 3329 | 3340 | 3360 | rVB  | 4154505 | 9811575  | 32.51% | 2.707% |
| 70 | 23.778 | 3468 | 3477 | 3491 | rBV6 | 411510  | 1622544  | 5.38%  | 0.448% |
| 71 | 24.248 | 3566 | 3578 | 3589 | rVB6 | 601919  | 2022508  | 6.70%  | 0.558% |
| 72 | 24.690 | 3662 | 3673 | 3691 | rVB  | 3679570 | 8867566  | 29.38% | 2.446% |
| 73 | 26.059 | 3961 | 3967 | 3984 | rVB3 | 350311  | 1030174  | 3.41%  | 0.284% |
| 74 | 26.199 | 3985 | 3997 | 4014 | rBV  | 3059252 | 7446373  | 24.67% | 2.054% |
| 75 | 27.660 | 4299 | 4311 | 4342 | rVB  | 2399919 | 6780125  | 22.47% | 1.870% |
| 76 | 28.117 | 4397 | 4409 | 4421 | rBV  | 777224  | 3595911  | 11.92% | 0.992% |
| 77 | 28.335 | 4450 | 4456 | 4466 | rVB2 | 499830  | 1251248  | 4.15%  | 0.345% |
| 78 | 29.178 | 4625 | 4637 | 4660 | rBV  | 1684018 | 4843949  | 16.05% | 1.336% |
| 79 | 30.807 | 4974 | 4987 | 5008 | rBV  | 1193327 | 3843467  | 12.74% | 1.060% |
| 80 | 32.539 | 5346 | 5359 | 5381 | rVB  | 863016  | 2842329  | 9.42%  | 0.784% |
| 81 | 34.359 | 5737 | 5750 | 5771 | rBV2 | 547209  | 1986458  | 6.58%  | 0.548% |
| 82 | 36.245 | 6143 | 6155 | 6186 | rVB  | 372808  | 1487920  | 4.93%  | 0.410% |
| 83 | 38.177 | 6555 | 6570 | 6610 | rVB4 | 240916  | 1231829  | 4.08%  | 0.340% |

Data Path : C:\msdchem\1\LEGACY\2012\February\  
Data File : 022912PA--dilute1000.D  
Acq On : 29 Feb 2012 10:00  
Operator :  
Sample : PA--dilute1000  
Misc : 1.0 uL 4 mL dilute1000  
ALS Vial : 55 Sample Multiplier: 1

Integration Parameters: rteint.p

Integrator: RTE

Smoothing : ON

Sampling : 1

Start Thrs: 0.2

Stop Thrs : 0

Filtering: 5

Min Area: 3 % of largest Peak

Max Peaks: 100

Peak Location: TOP

If leading or trailing edge < 100 prefer < Baseline drop else tangent >

Peak separation: 5

Method : C:\msdchem\1\METHODS\TLTICPAH.M

Title : PAH5437

Sum of corrected areas: 362510964

Data Path : C:\msdchem\1\LEGACY\2012\February\  
Data File : 022912PA-dilute1000.D  
Acq On : 29 Feb 2012 10:00  
Operator :  
Sample : PA--dilute1000  
Misc : 1.0 uL 4 mL dilute1000  
ALS Vial : 55 Sample Multiplier: 1

Quant Method : C:\msdchem\1\METHODS\TLTICPAH.M  
Quant Title : PAH5437

TIC Library : C:\Database\NIST08.L  
TIC Integration Parameters: rteint.p

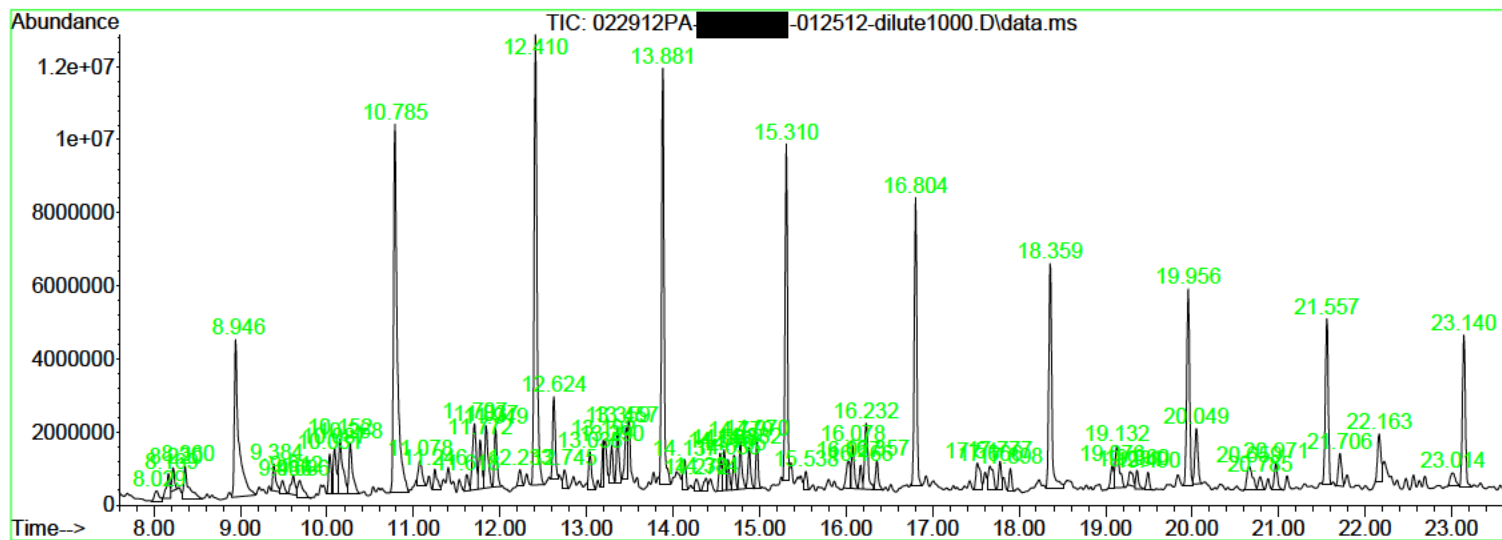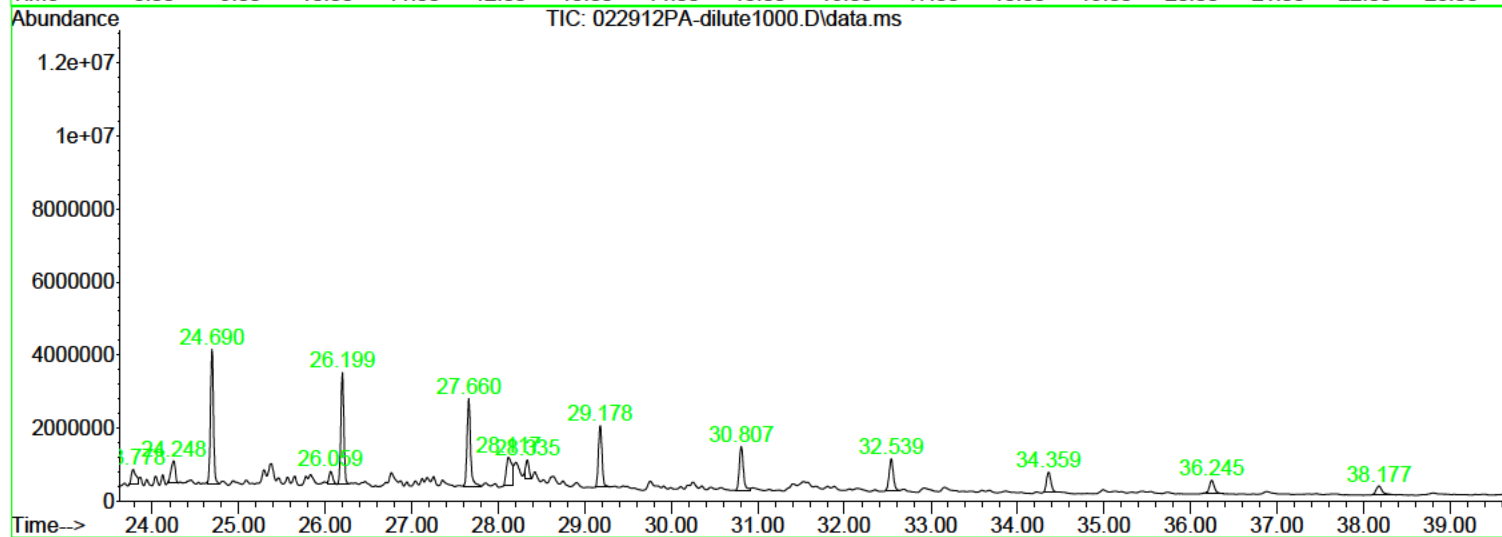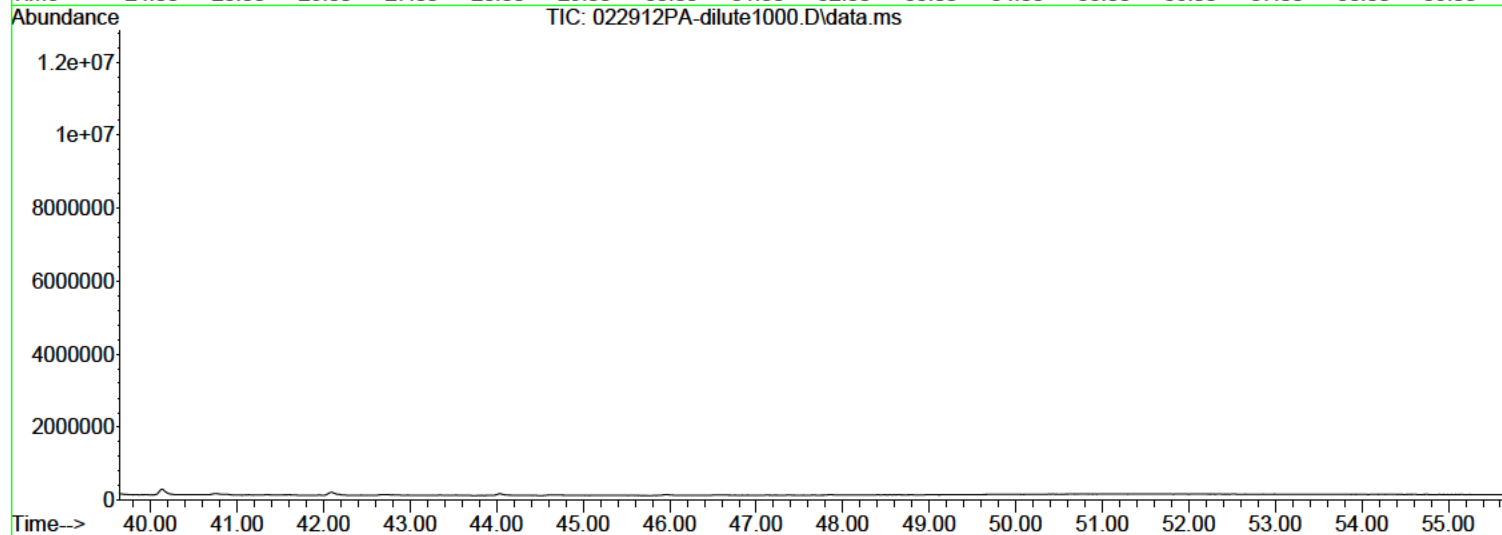

Data Path : C:\msdchem\1\LEGACY\2012\February\  
Data File : 022912PA--dilute1000.D  
Acq On : 29 Feb 2012 10:00  
Operator :  
Sample : PA-dilute1000  
Misc : 1.0 uL 4 mL dilute1000  
ALS Vial : 55 Sample Multiplier: 1

Quant Method : C:\msdchem\1\METHODS\TLTICPAH.M  
Quant Title : PAH5437

TIC Library : C:\Database\NIST08.L  
TIC Integration Parameters: rteint.p

\*\*\*\*\*  
Peak Number 1 Decane Concentration Rank 6

| R.T.  | EstConc    | Area     | Relative to ISTD  | R.T.  |
|-------|------------|----------|-------------------|-------|
| 8.946 | 1518.86 ng | 15188600 | External Standard | 0.000 |

| Hit# | of              | 5 | Tentative ID | MW  | MolForm | CAS#        | Qual |
|------|-----------------|---|--------------|-----|---------|-------------|------|
| 1    | Decane          |   |              | 142 | C10H22  | 000124-18-5 | 91   |
| 2    | Decane          |   |              | 142 | C10H22  | 000124-18-5 | 91   |
| 3    | Decane          |   |              | 142 | C10H22  | 000124-18-5 | 90   |
| 4    | Tritetracontane |   |              | 605 | C43H88  | 007098-21-7 | 72   |
| 5    | Hexadecane      |   |              | 226 | C16H34  | 000544-76-3 | 72   |

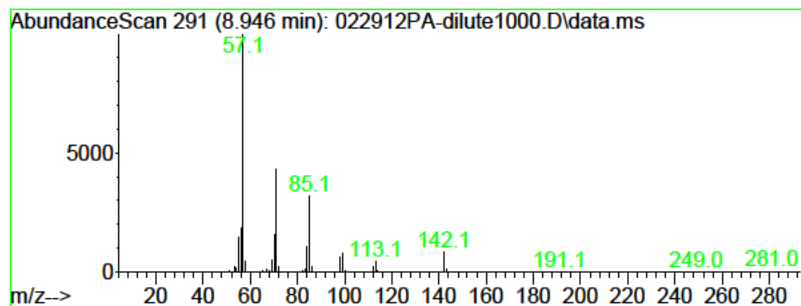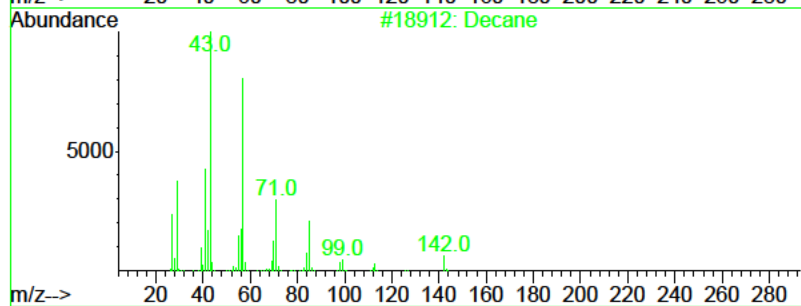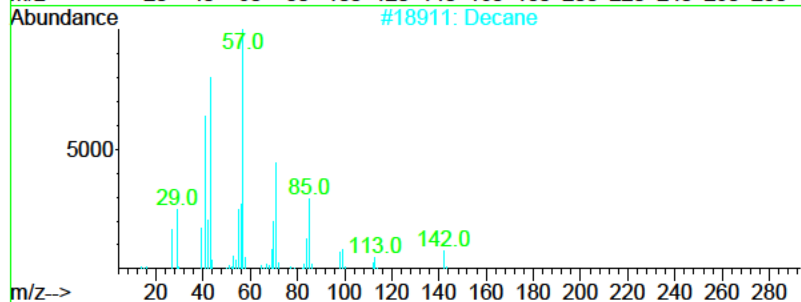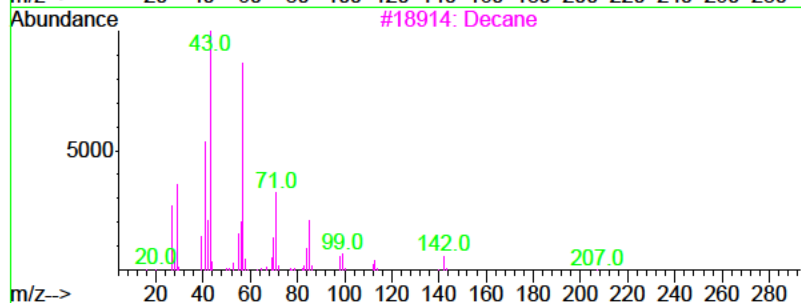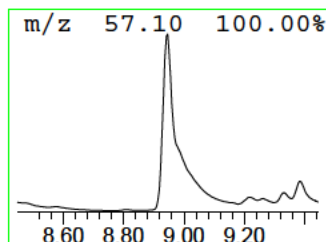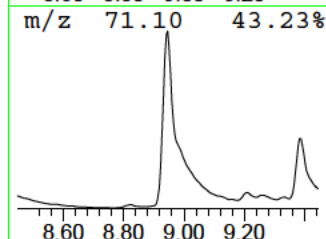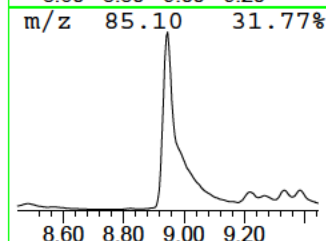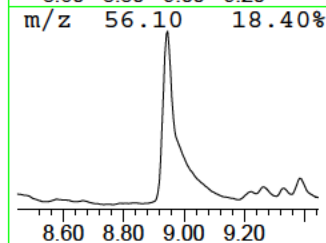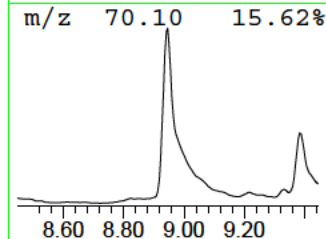

Data Path : C:\msdchem\1\LEGACY\2012\February\  
Data File : 022912PA-dilute1000.D  
Acq On : 29 Feb 2012 10:00  
Operator :  
Sample : PA-dilute1000  
Misc : 1.0 uL 4 mL dilute1000  
ALS Vial : 55 Sample Multiplier: 1

Quant Method : C:\msdchem\1\METHODS\TLTICPAH.M  
Quant Title : PAH5437

TIC Library : C:\Database\NIST08.L  
TIC Integration Parameters: rteint.p

\*\*\*\*\*  
Peak Number 2 Decane, 2-methyl- Concentration Rank 15

| R.T.   | EstConc   | Area    | Relative to ISTD  | R.T.  |
|--------|-----------|---------|-------------------|-------|
| 10.152 | 497.21 ng | 4972070 | External Standard | 0.000 |

| Hit# | of | 5 | Tentative ID                 | MW  | MolForm | CAS#        | Qual |
|------|----|---|------------------------------|-----|---------|-------------|------|
| 1    |    |   | Decane, 2-methyl-            | 156 | C11H24  | 006975-98-0 | 74   |
| 2    |    |   | Decane, 3,8-dimethyl-        | 170 | C12H26  | 017312-55-9 | 72   |
| 3    |    |   | Decane, 2-methyl-            | 156 | C11H24  | 006975-98-0 | 72   |
| 4    |    |   | Octane, 3,4,5,6-tetramethyl- | 170 | C12H26  | 062185-21-1 | 64   |
| 5    |    |   | Undecane, 2,8-dimethyl-      | 184 | C13H28  | 017301-25-6 | 64   |

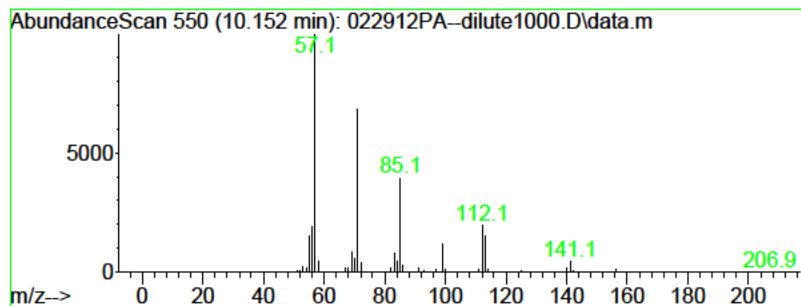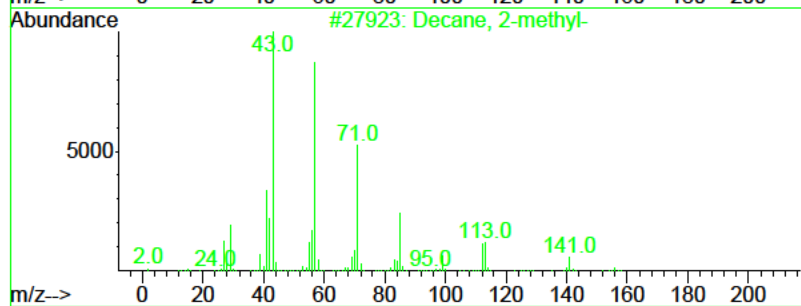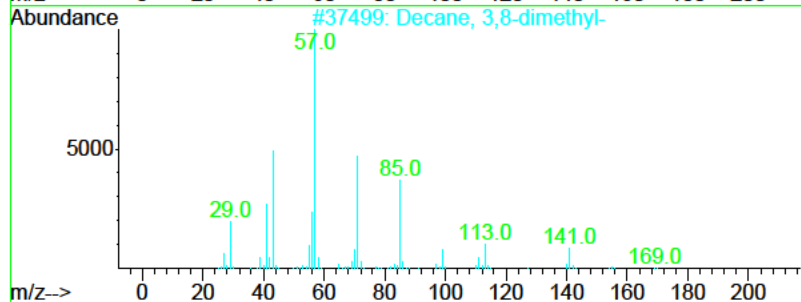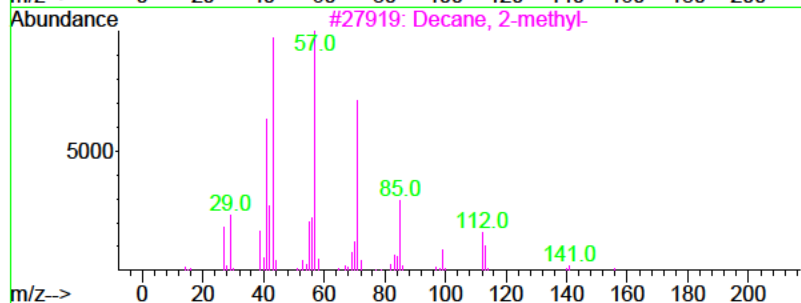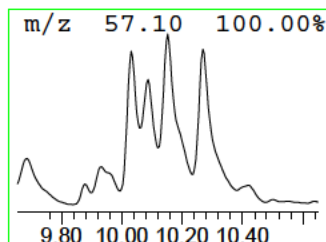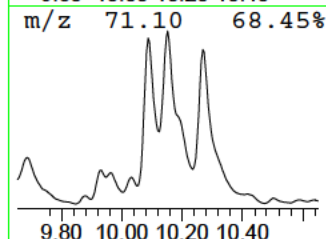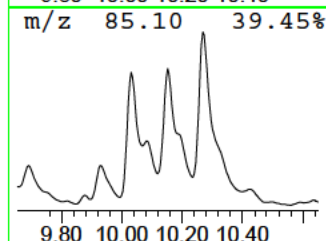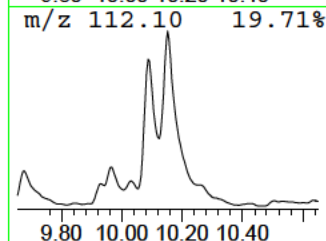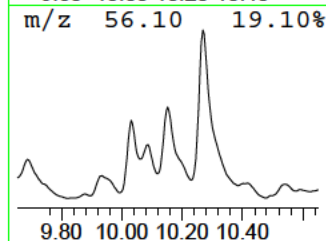

Data Path : C:\msdchem\1\LEGACY\2012\February\  
Data File : 022912PA-dilute1000.D  
Acq On : 29 Feb 2012 10:00  
Operator :  
Sample : PA-dilute1000  
Misc : 1.0 uL M 4 mL dilute1000  
ALS Vial : 55 Sample Multiplier: 1

Quant Method : C:\msdchem\1\METHODS\TLTICPAH.M  
Quant Title : PAH5437

TIC Library : C:\Database\NIST08.L  
TIC Integration Parameters: rteint.p

\*\*\*\*\*  
Peak Number 3 Decane, 3-methyl- Concentration Rank 19

| R.T.   | EstConc   | Area    | Relative to ISTD  | R.T.  |
|--------|-----------|---------|-------------------|-------|
| 10.268 | 402.66 ng | 4026590 | External Standard | 0.000 |

| Hit# | of | 5 | Tentative ID            | MW  | MolForm | CAS#        | Qual |
|------|----|---|-------------------------|-----|---------|-------------|------|
| 1    |    |   | Decane, 3-methyl-       | 156 | C11H24  | 013151-34-3 | 87   |
| 2    |    |   | Undecane, 2,9-dimethyl- | 184 | C13H28  | 017301-26-7 | 64   |
| 3    |    |   | Dodecane, 3-methyl-     | 184 | C13H28  | 017312-57-1 | 59   |
| 4    |    |   | Undecane, 3-methyl-     | 170 | C12H26  | 001002-43-3 | 59   |
| 5    |    |   | Decane, 3-methyl-       | 156 | C11H24  | 013151-34-3 | 59   |

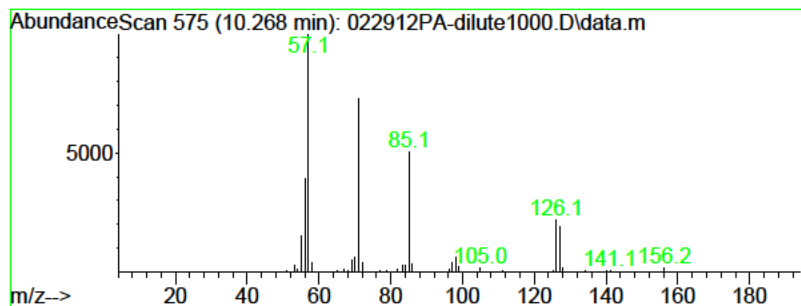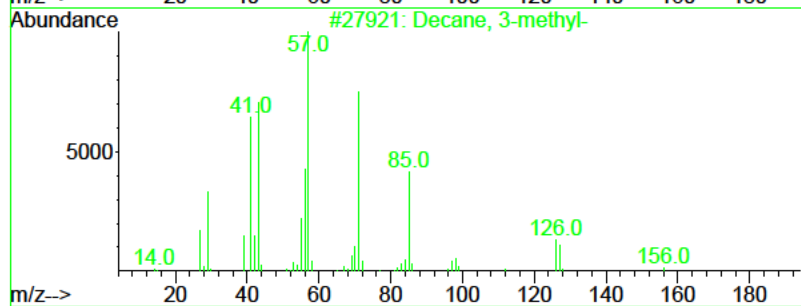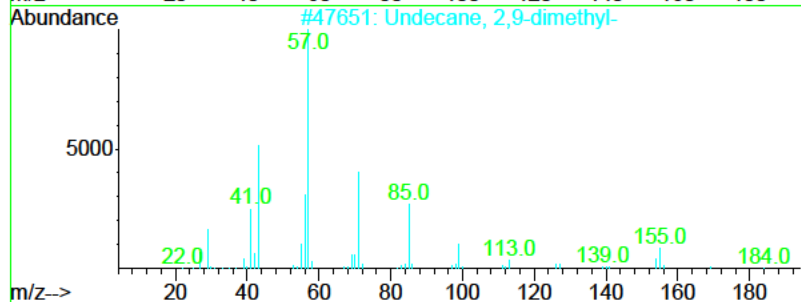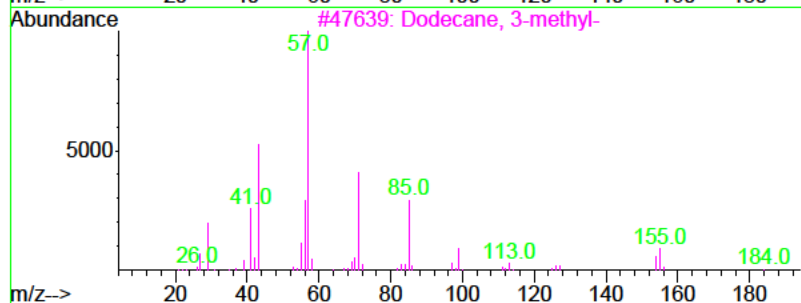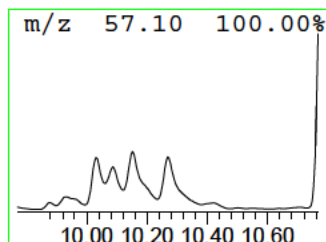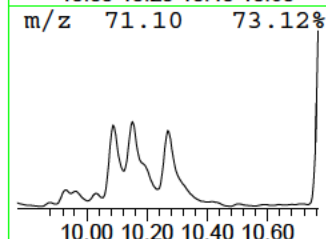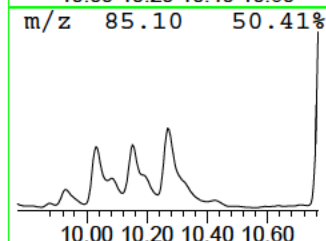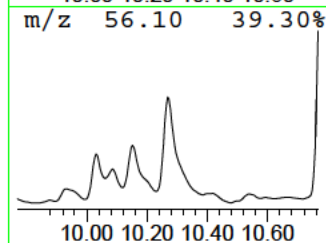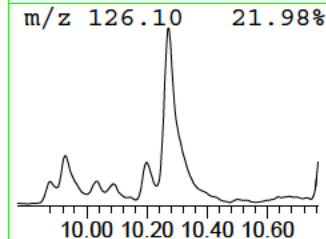

Data Path : C:\msdchem\1\LEGACY\2012\February\  
Data File : 022912PA-dilute1000.D  
Acq On : 29 Feb 2012 10:00  
Operator :  
Sample : PA--dilute1000  
Misc : 1.0 uL 4 mL dilute1000  
ALS Vial : 55 Sample Multiplier: 1

Quant Method : C:\msdchem\1\METHODS\TLTICPAH.M  
Quant Title : PAH5437

TIC Library : C:\Database\NIST08.L  
TIC Integration Parameters: rteint.p

\*\*\*\*\*  
Peak Number 4 Undecane Concentration Rank 1

| R.T.   | EstConc    | Area     | Relative to ISTD  | R.T.  |
|--------|------------|----------|-------------------|-------|
| 10.785 | 3017.96 ng | 30179600 | External Standard | 0.000 |

| Hit# | of       | 5 | Tentative ID | MW  | MolForm | CAS#        | Qual |
|------|----------|---|--------------|-----|---------|-------------|------|
| 1    | Undecane |   |              | 156 | C11H24  | 001120-21-4 | 94   |
| 2    | Undecane |   |              | 156 | C11H24  | 001120-21-4 | 91   |
| 3    | Decane   |   |              | 142 | C10H22  | 000124-18-5 | 90   |
| 4    | Undecane |   |              | 156 | C11H24  | 001120-21-4 | 81   |
| 5    | Undecane |   |              | 156 | C11H24  | 001120-21-4 | 81   |

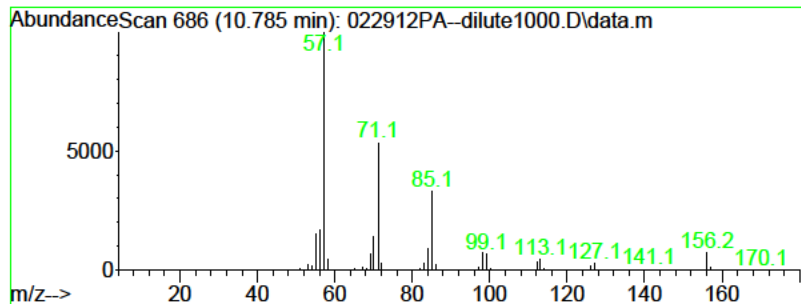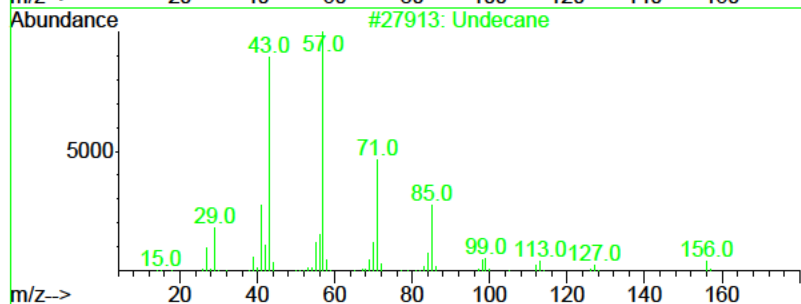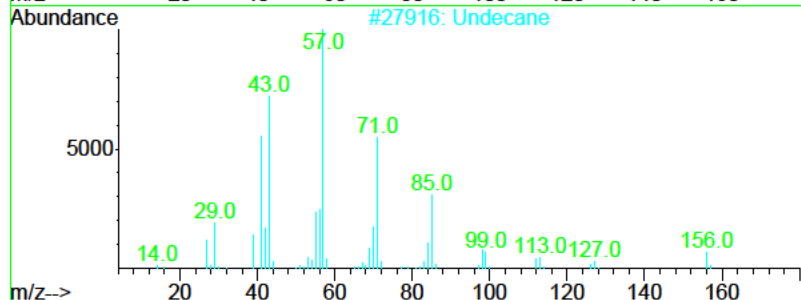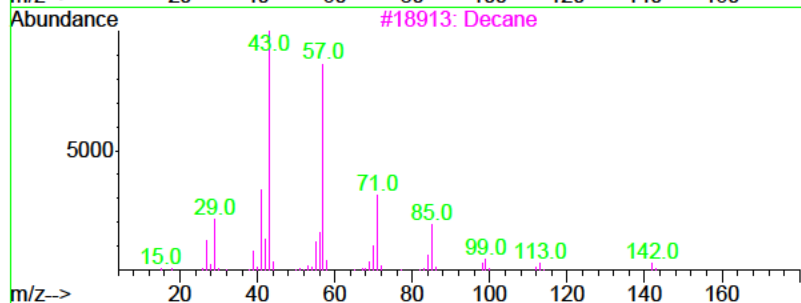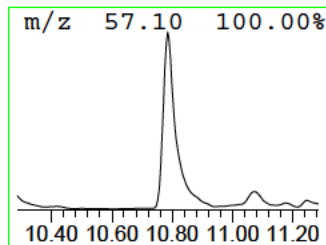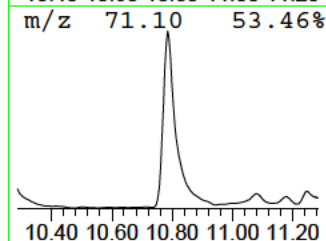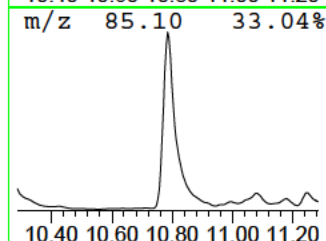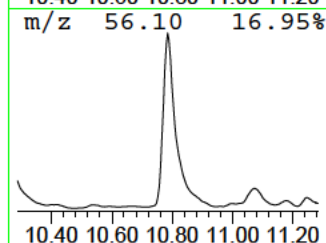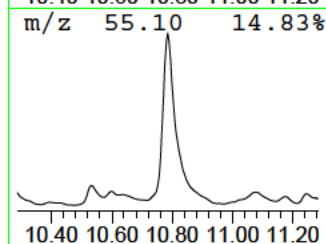

Data Path : C:\msdchem\1\LEGACY\2012\February\  
Data File : 022912PA-dilute1000.D  
Acq On : 29 Feb 2012 10:00  
Operator :  
Sample : PAdilute1000  
Misc : 1.0 uL 4 mL dilute1000  
ALS Vial : 55 Sample Multiplier: 1

Quant Method : C:\msdchem\1\METHODS\TLTICPAH.M  
Quant Title : PAH5437

TIC Library : C:\Database\NIST08.L  
TIC Integration Parameters: rteint.p

\*\*\*\*\*  
Peak Number 5 5-Ethyldecane Concentration Rank 13

| R.T.      | EstConc             | Area    | Relative to ISTD  | R.T.        |      |
|-----------|---------------------|---------|-------------------|-------------|------|
| 11.707    | 543.84 ng           | 5438420 | External Standard | 0.000       |      |
| Hit# of 5 | Tentative ID        | MW      | MolForm           | CAS#        | Qual |
| 1         | 5-Ethyldecane       | 170     | C12H26            | 017302-36-2 | 83   |
| 2         | Undecane, 5-methyl- | 170     | C12H26            | 001632-70-8 | 78   |
| 3         | Octane, 4-ethyl-    | 142     | C10H22            | 015869-86-0 | 78   |
| 4         | 2,6-Dimethyldecane  | 170     | C12H26            | 013150-81-7 | 68   |
| 5         | Undecane, 5-methyl- | 170     | C12H26            | 001632-70-8 | 64   |

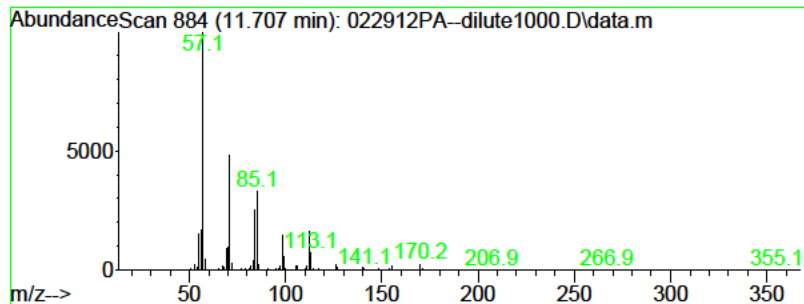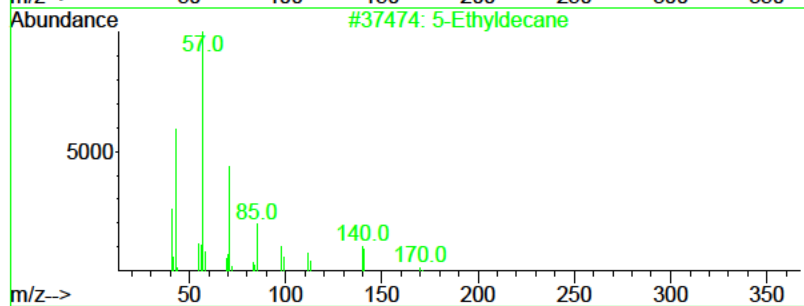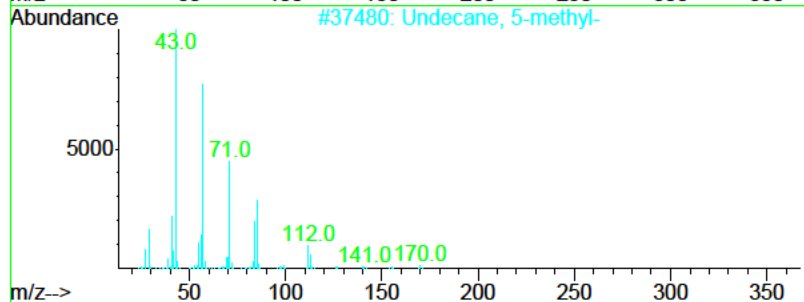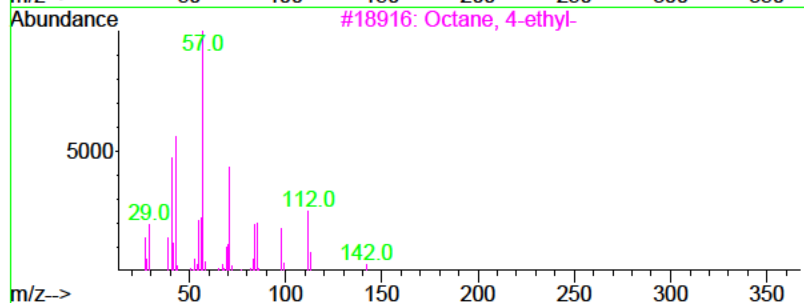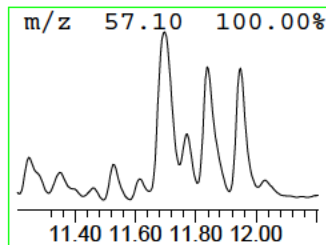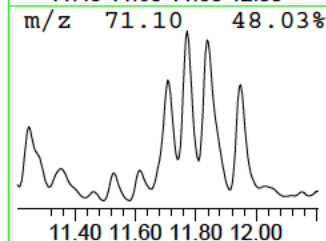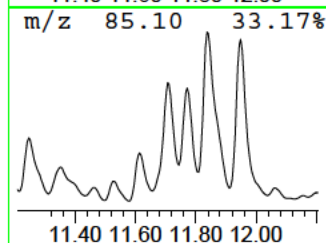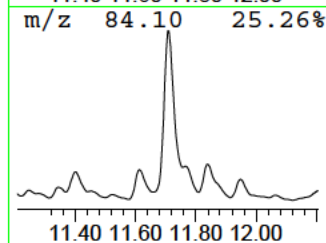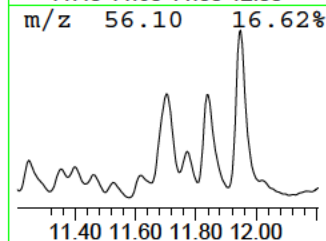

Data Path : C:\msdchem\1\LEGACY\2012\February\  
Data File : 022912PA--dilute1000.D  
Acq On : 29 Feb 2012 10:00  
Operator :  
Sample : PA-dilute1000  
Misc : 1.0 uL 4 mL dilute1000  
ALS Vial : 55 Sample Multiplier: 1

Quant Method : C:\msdchem\1\METHODS\TLTICPAH.M  
Quant Title : PAH5437

TIC Library : C:\Database\NIST08.L  
TIC Integration Parameters: rteint.p

\*\*\*\*\*  
Peak Number 6 Undecane, 2-methyl- Concentration Rank 18

| R.T.   | EstConc   | Area    | Relative to ISTD  | R.T.  |
|--------|-----------|---------|-------------------|-------|
| 11.837 | 457.24 ng | 4572430 | External Standard | 0.000 |

| Hit# | of                  | 5   | Tentative ID | MW          | MolForm | CAS# | Qual |
|------|---------------------|-----|--------------|-------------|---------|------|------|
| 1    | Undecane, 2-methyl- | 170 | C12H26       | 007045-71-8 | 91      |      |      |
| 2    | Undecane, 2-methyl- | 170 | C12H26       | 007045-71-8 | 83      |      |      |
| 3    | Dodecane, 3-methyl- | 184 | C13H28       | 017312-57-1 | 78      |      |      |
| 4    | Undecane, 5-methyl- | 170 | C12H26       | 001632-70-8 | 64      |      |      |
| 5    | Undecane, 3-methyl- | 170 | C12H26       | 001002-43-3 | 64      |      |      |

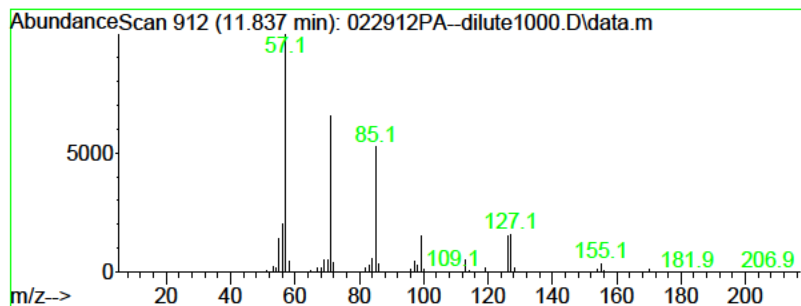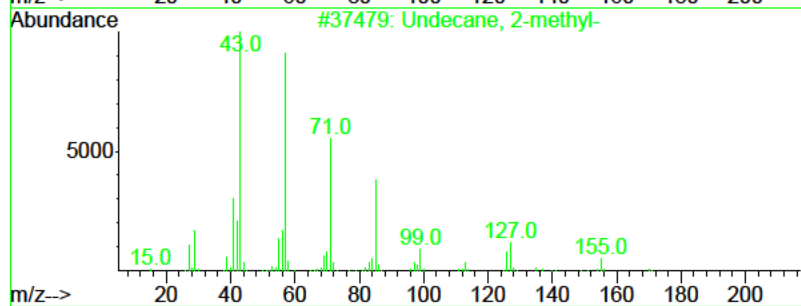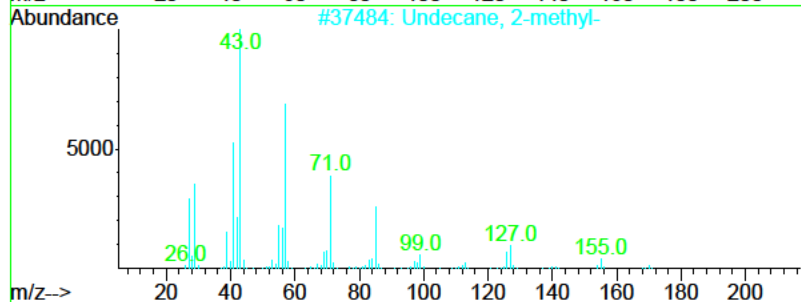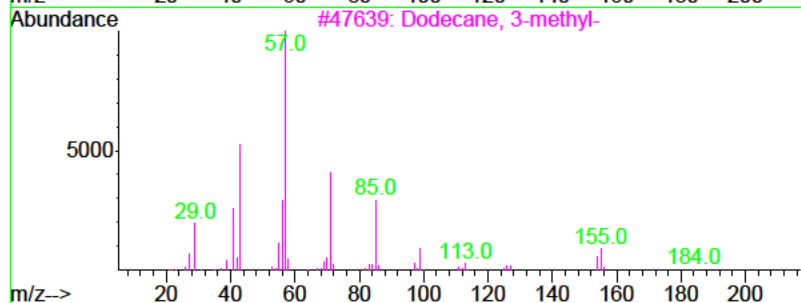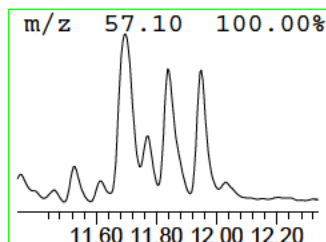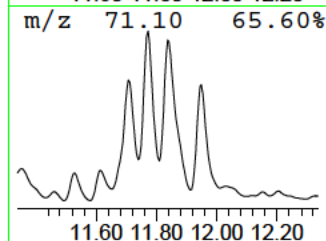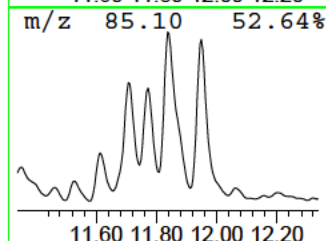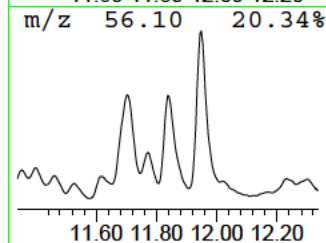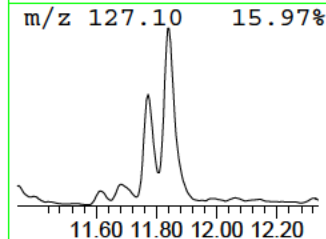

Data Path : C:\msdchem\1\LEGACY\2012\February\  
Data File : 022912PA-dilute1000.D  
Acq On : 29 Feb 2012 10:00  
Operator :  
Sample : PAdilute1000  
Misc : 1.0 uL 4 mL dilute1000  
ALS Vial : 55 Sample Multiplier: 1

Quant Method : C:\msdchem\1\METHODS\TLTICPAH.M  
Quant Title : PAH5437

TIC Library : C:\Database\NIST08.L  
TIC Integration Parameters: rteint.p

\*\*\*\*\*  
Peak Number 7 Dodecane Concentration Rank 2

| R.T.   | EstConc    | Area     | Relative to ISTD  | R.T.  |
|--------|------------|----------|-------------------|-------|
| 12.410 | 2834.87 ng | 28348700 | External Standard | 0.000 |

| Hit# | of        | 5 | Tentative ID | MW  | MolForm | CAS#        | Qual |
|------|-----------|---|--------------|-----|---------|-------------|------|
| 1    | Dodecane  |   |              | 170 | C12H26  | 000112-40-3 | 97   |
| 2    | Dodecane  |   |              | 170 | C12H26  | 000112-40-3 | 95   |
| 3    | Dodecane  |   |              | 170 | C12H26  | 000112-40-3 | 95   |
| 4    | Dodecane  |   |              | 170 | C12H26  | 000112-40-3 | 91   |
| 5    | Tridecane |   |              | 184 | C13H28  | 000629-50-5 | 90   |

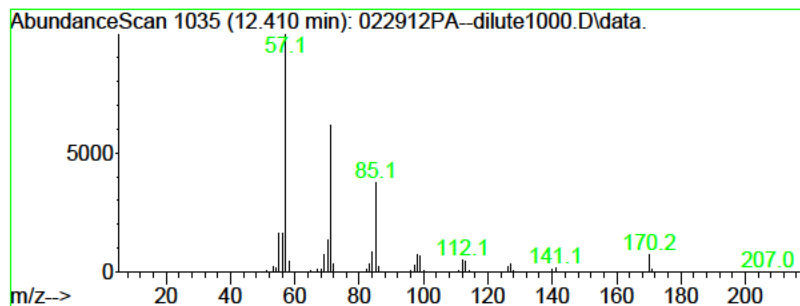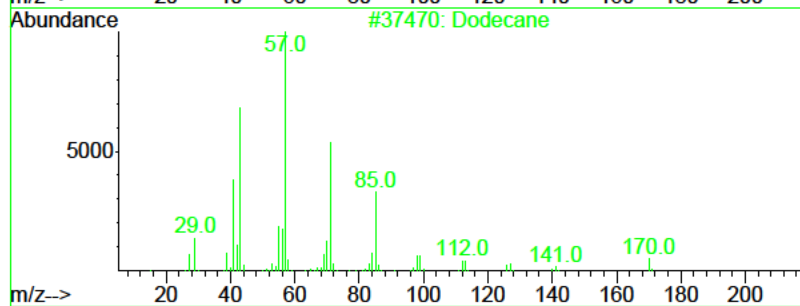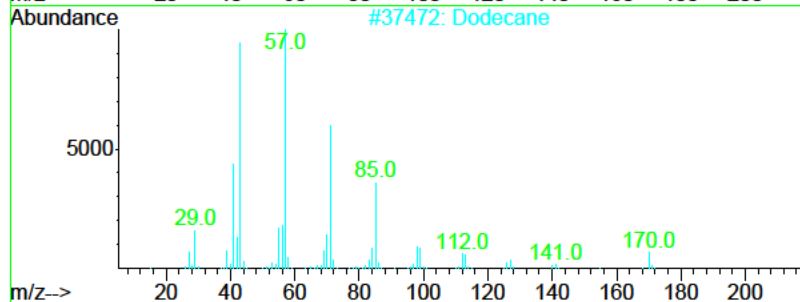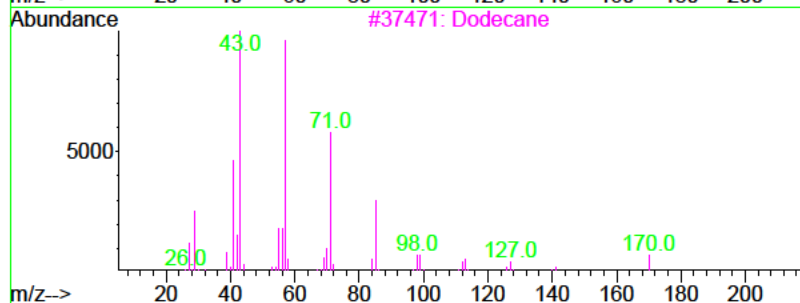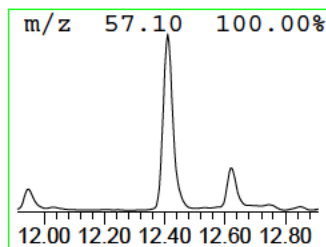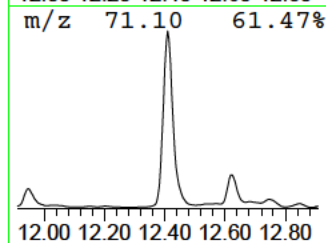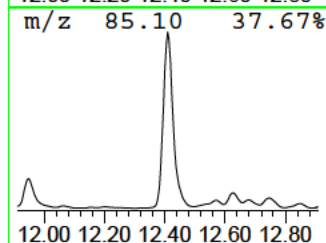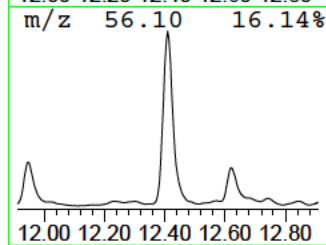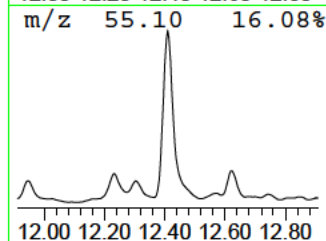

Data Path : C:\msdchem\1\LEGACY\2012\February\  
Data File : 022912PA-dilute1000.D  
Acq On : 29 Feb 2012 10:00  
Operator :  
Sample : PA--dilute1000  
Misc : 1.0 uL 4 mL dilute1000  
ALS Vial : 55 Sample Multiplier: 1

Quant Method : C:\msdchem\1\METHODS\TLTICPAH.M  
Quant Title : PAH5437

TIC Library : C:\Database\NIST08.L  
TIC Integration Parameters: rteint.p

\*\*\*\*\*  
Peak Number 8 Undecane, 2,6-dimethyl- Concentration Rank 17

| R.T.   | EstConc   | Area    | Relative to ISTD  | R.T.  |
|--------|-----------|---------|-------------------|-------|
| 12.624 | 473.69 ng | 4736940 | External Standard | 0.000 |

| Hit# | of | 5 | Tentative ID             | MW  | MolForm | CAS#        | Qual |
|------|----|---|--------------------------|-----|---------|-------------|------|
| 1    |    |   | Undecane, 2,6-dimethyl-  | 184 | C13H28  | 017301-23-4 | 94   |
| 2    |    |   | Undecane, 2,6-dimethyl-  | 184 | C13H28  | 017301-23-4 | 94   |
| 3    |    |   | Dodecane, 6-methyl-      | 184 | C13H28  | 006044-71-9 | 83   |
| 4    |    |   | Undecane, 3,6-dimethyl-  | 184 | C13H28  | 017301-28-9 | 78   |
| 5    |    |   | Decane, 2,5,9-trimethyl- | 184 | C13H28  | 062108-22-9 | 72   |

AbundanceScan 1081 (12.624 min): 022912PA-dilute1000.D\data.

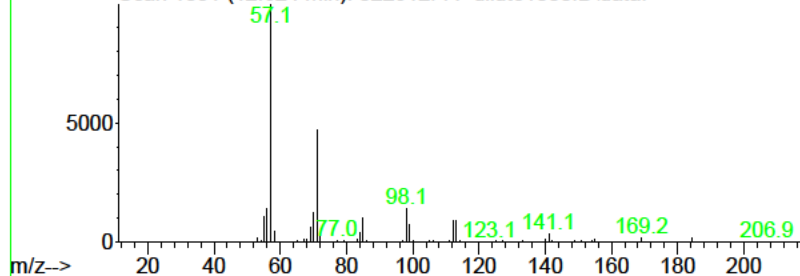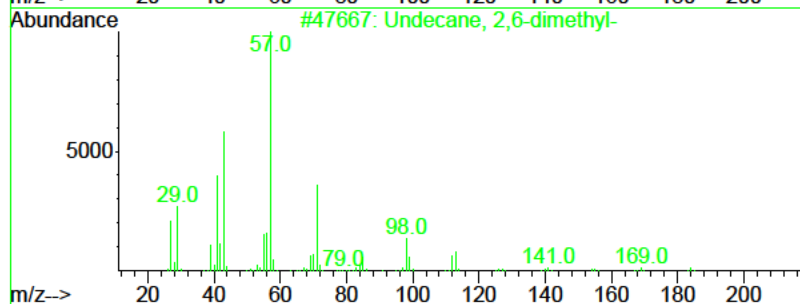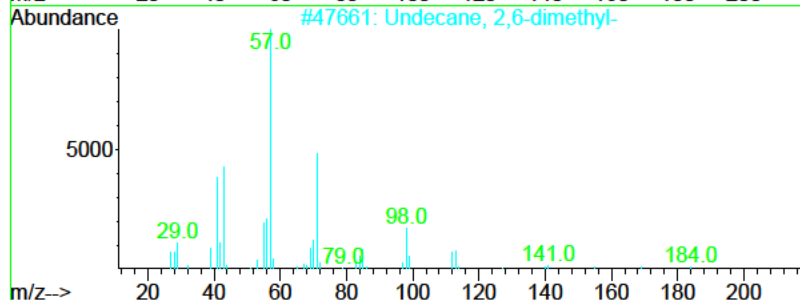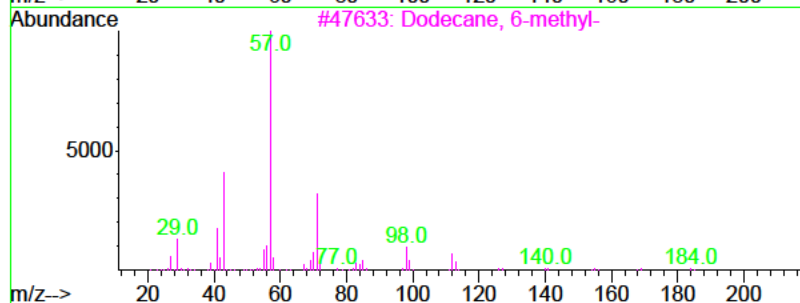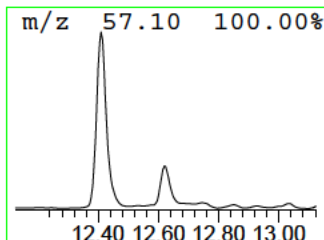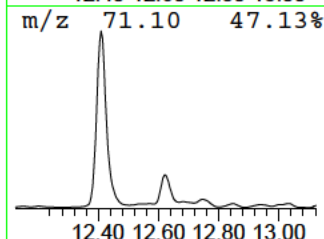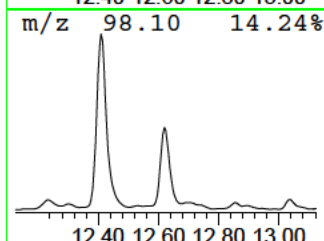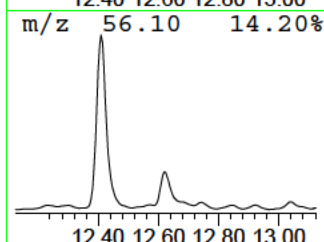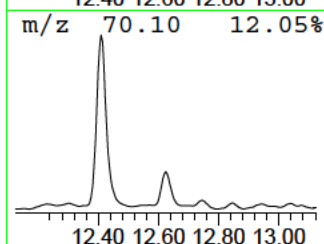

Data Path : C:\msdchem\1\LEGACY\2012\February\  
Data File : 022912PA--dilute1000.D  
Acq On : 29 Feb 2012 10:00  
Operator :  
Sample : PA--dilute1000  
Misc : 1.0 uL 4 mL dilute1000  
ALS Vial : 55 Sample Multiplier: 1

Quant Method : C:\msdchem\1\METHODS\TLTICPAH.M  
Quant Title : PAH5437

TIC Library : C:\Database\NIST08.L  
TIC Integration Parameters: rteint.p

\*\*\*\*\*  
Peak Number 9 Tridecane Concentration Rank 3

| R.T.   | EstConc    | Area     | Relative to ISTD  | R.T.  |
|--------|------------|----------|-------------------|-------|
| 13.881 | 2298.15 ng | 22981500 | External Standard | 0.000 |

| Hit# | of | 5 | Tentative ID | MW  | MolForm | CAS#        | Qual |
|------|----|---|--------------|-----|---------|-------------|------|
| 1    |    |   | Tridecane    | 184 | C13H28  | 000629-50-5 | 97   |
| 2    |    |   | Tridecane    | 184 | C13H28  | 000629-50-5 | 96   |
| 3    |    |   | Tridecane    | 184 | C13H28  | 000629-50-5 | 93   |
| 4    |    |   | Hexadecane   | 226 | C16H34  | 000544-76-3 | 90   |
| 5    |    |   | Tridecane    | 184 | C13H28  | 000629-50-5 | 90   |

AbundanceScan 1351 (13.881 min): 022912PA--dilute1000.D\data.

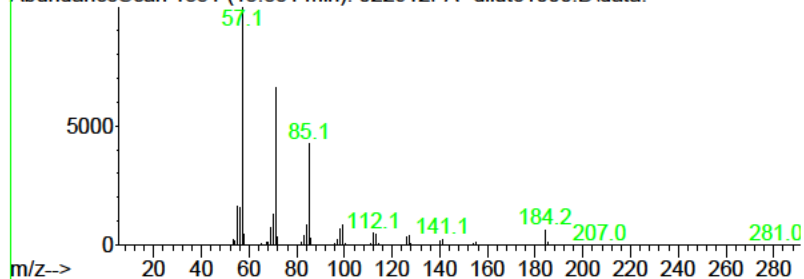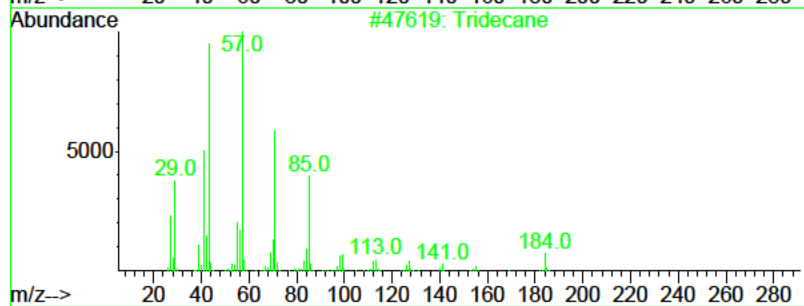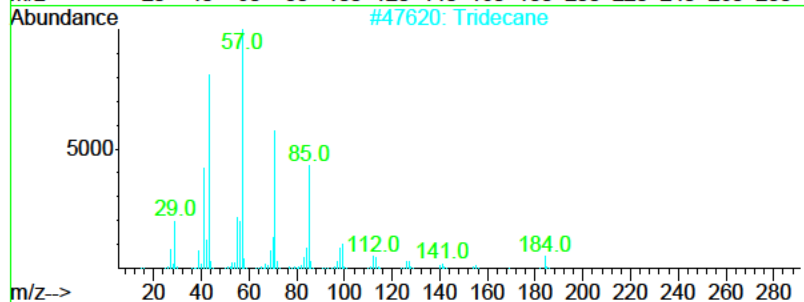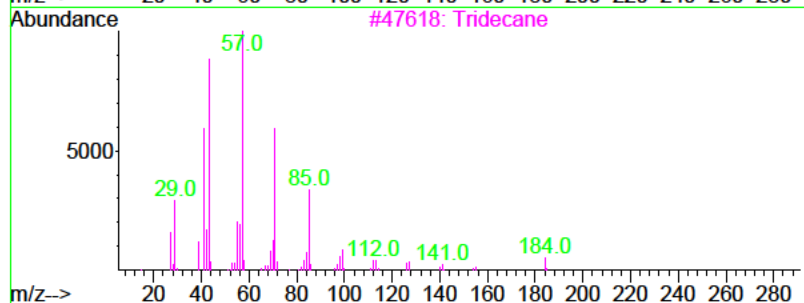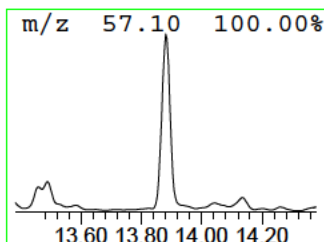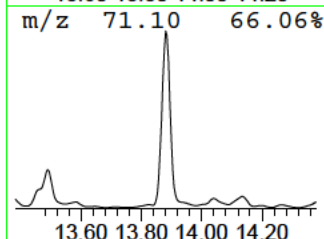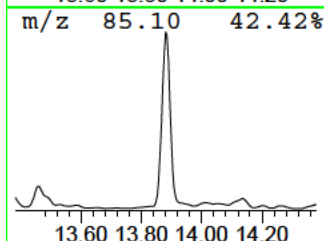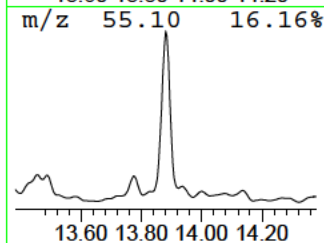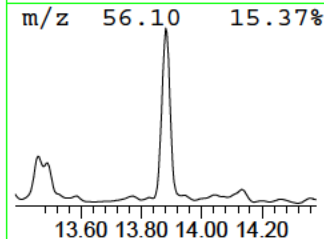

Data Path : C:\msdchem\1\LEGACY\2012\February\  
Data File : 022912PA--dilute1000.D  
Acq On : 29 Feb 2012 10:00  
Operator :  
Sample : PA-dilute1000  
Misc : 1.0 uL 4 mL dilute1000  
ALS Vial : 55 Sample Multiplier: 1

Quant Method : C:\msdchem\1\METHODS\TLTICPAH.M  
Quant Title : PAH5437

TIC Library : C:\Database\NIST08.L  
TIC Integration Parameters: rteint.p

\*\*\*\*\*  
Peak Number 10 Tetradecane Concentration Rank 4

| R.T.   | EstConc    | Area     | Relative to ISTD  | R.T.  |
|--------|------------|----------|-------------------|-------|
| 15.310 | 1735.55 ng | 17355500 | External Standard | 0.000 |

| Hit# | of | 5 | Tentative ID | MW  | MolForm | CAS#        | Qual |
|------|----|---|--------------|-----|---------|-------------|------|
| 1    |    |   | Tetradecane  | 198 | C14H30  | 000629-59-4 | 97   |
| 2    |    |   | Tetradecane  | 198 | C14H30  | 000629-59-4 | 96   |
| 3    |    |   | Tetradecane  | 198 | C14H30  | 000629-59-4 | 95   |
| 4    |    |   | Tetradecane  | 198 | C14H30  | 000629-59-4 | 93   |
| 5    |    |   | Tridecane    | 184 | C13H28  | 000629-50-5 | 90   |

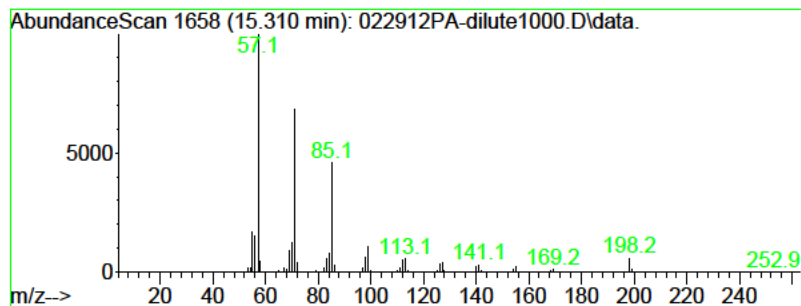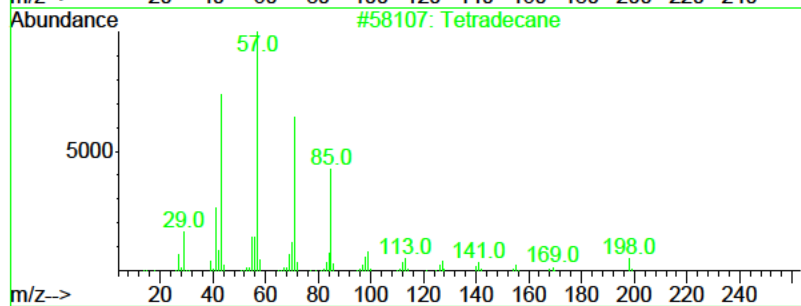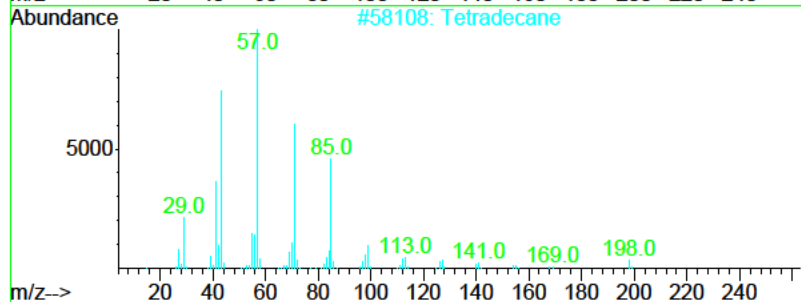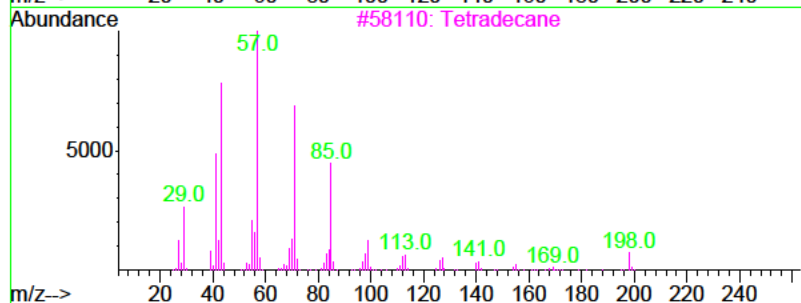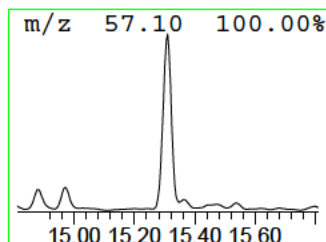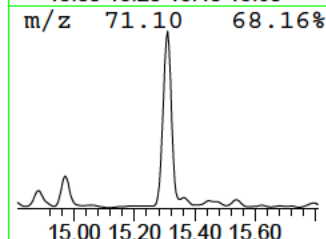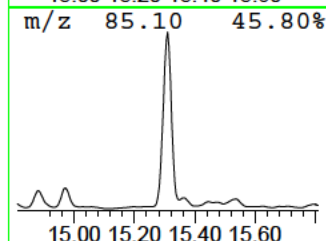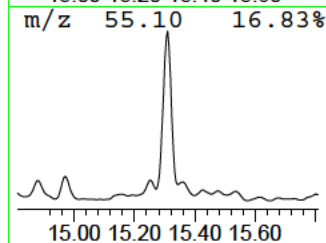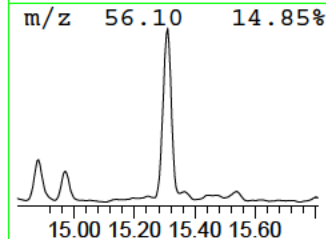

Data Path : C:\msdchem\1\LEGACY\2012\February\  
Data File : 022912PA--dilute1000.D  
Acq On : 29 Feb 2012 10:00  
Operator :  
Sample : PA---dilute1000  
Misc : 1.0 uL 4 mL dilute1000  
ALS Vial : 55 Sample Multiplier: 1

Quant Method : C:\msdchem\1\METHODS\TLTICPAH.M  
Quant Title : PAH5437

TIC Library : C:\Database\NIST08.L  
TIC Integration Parameters: rteint.p

\*\*\*\*\*  
Peak Number 11 Hexadecane Concentration Rank 14

| R.T.   | EstConc   | Area    | Relative to ISTD  | R.T.  |
|--------|-----------|---------|-------------------|-------|
| 16.232 | 498.76 ng | 4987600 | External Standard | 0.000 |

| Hit# | of | 5 | Tentative ID           | MW  | MolForm | CAS#        | Qual |
|------|----|---|------------------------|-----|---------|-------------|------|
| 1    |    |   | Hexadecane             | 226 | C16H34  | 000544-76-3 | 91   |
| 2    |    |   | Pentadecane, 7-methyl- | 226 | C16H34  | 006165-40-8 | 90   |
| 3    |    |   | Pentadecane, 4-methyl- | 226 | C16H34  | 002801-87-8 | 90   |
| 4    |    |   | Heneicosane            | 296 | C21H44  | 000629-94-7 | 90   |
| 5    |    |   | Hexacosane             | 366 | C26H54  | 000630-01-3 | 90   |

AbundanceScan 1856 (16.232 min): 022912PA--dilute1000.D\data.

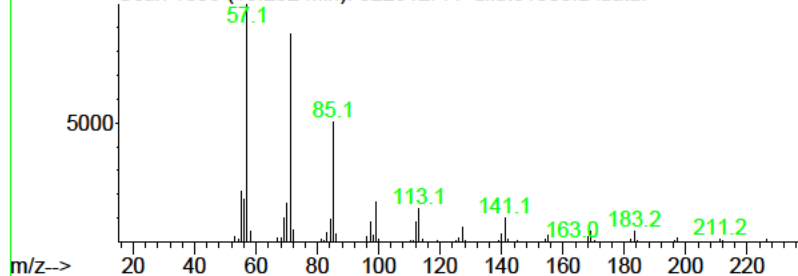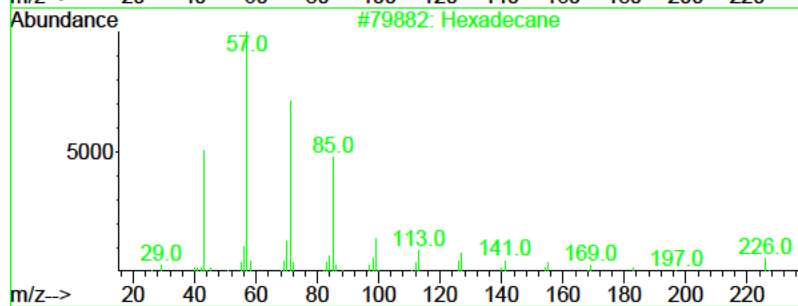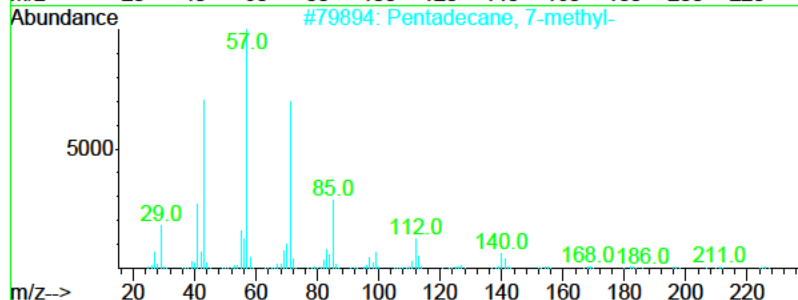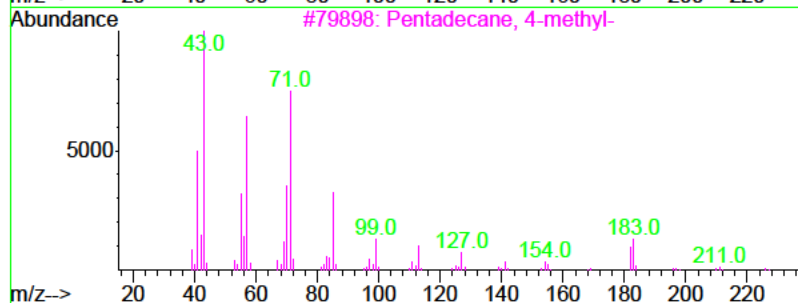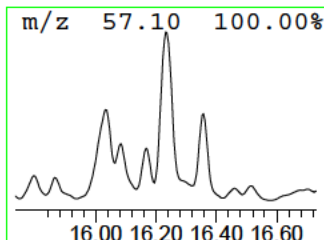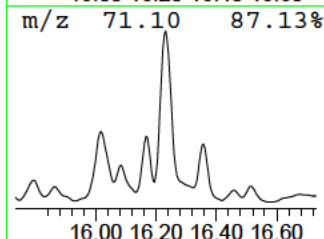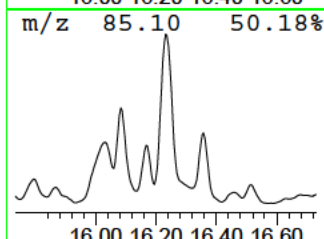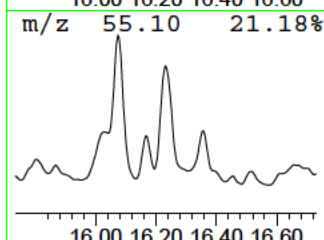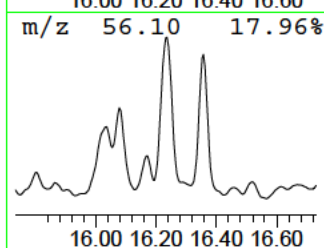

Data Path : C:\msdchem\1\LEGACY\2012\February\  
Data File : 022912PA--dilute1000.D  
Acq On : 29 Feb 2012 10:00  
Operator :  
Sample : PA--dilute1000  
Misc : 1.0 uL 4 mL dilute1000  
ALS Vial : 55 Sample Multiplier: 1

Quant Method : C:\msdchem\1\METHODS\TLTICPAH.M  
Quant Title : PAH5437

TIC Library : C:\Database\NIST08.L  
TIC Integration Parameters: rteint.p

\*\*\*\*\*  
Peak Number 12 Pentadecane Concentration Rank 5

| R.T.   | EstConc    | Area     | Relative to ISTD  | R.T.  |
|--------|------------|----------|-------------------|-------|
| 16.804 | 1607.30 ng | 16073000 | External Standard | 0.000 |

| Hit# | of | 5 | Tentative ID | MW  | MolForm | CAS#        | Qual |
|------|----|---|--------------|-----|---------|-------------|------|
| 1    |    |   | Pentadecane  | 212 | C15H32  | 000629-62-9 | 97   |
| 2    |    |   | Pentadecane  | 212 | C15H32  | 000629-62-9 | 96   |
| 3    |    |   | Pentadecane  | 212 | C15H32  | 000629-62-9 | 96   |
| 4    |    |   | Tetradecane  | 198 | C14H30  | 000629-59-4 | 91   |
| 5    |    |   | Heptadecane  | 240 | C17H36  | 000629-78-7 | 91   |

AbundanceScan 1979 (16.804 min): 022912PA-dilute1000.D\data.

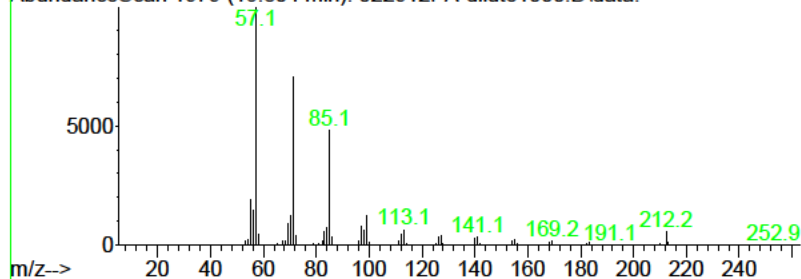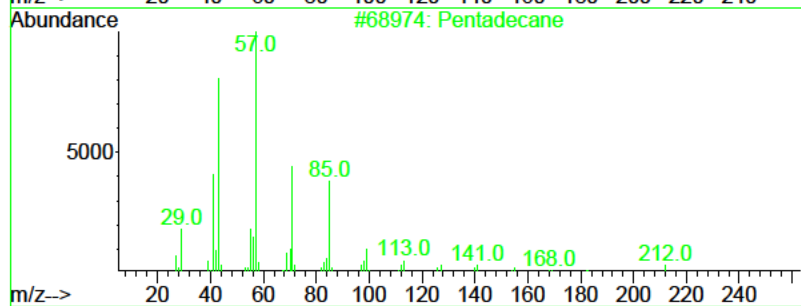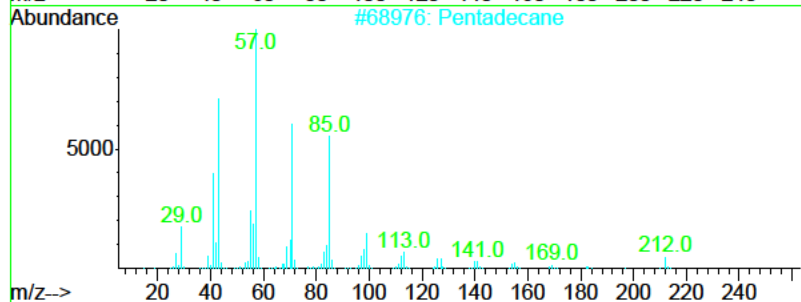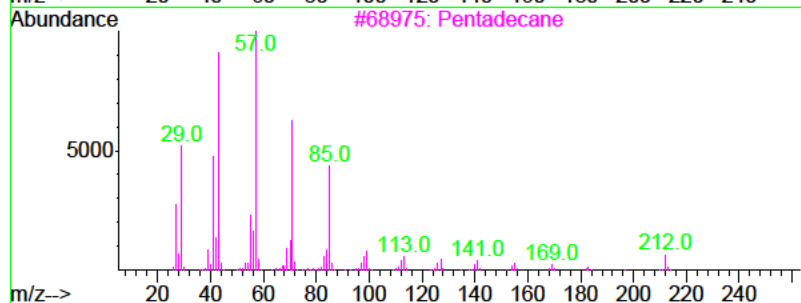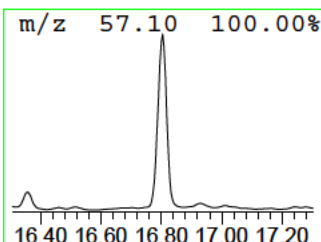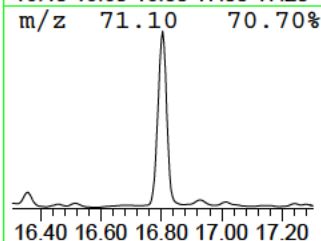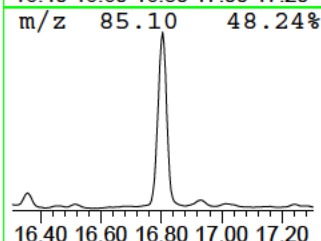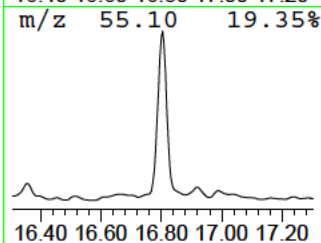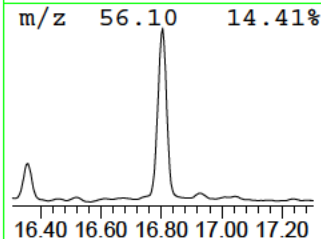

Data Path : C:\msdchem\1\LEGACY\2012\February\  
Data File : 022912PA--dilute1000.D  
Acq On : 29 Feb 2012 10:00  
Operator :  
Sample : PA-dilute1000  
Misc : 1.0 uL 4 mL dilute1000  
ALS Vial : 55 Sample Multiplier: 1

Quant Method : C:\msdchem\1\METHODS\TLTICPAH.M  
Quant Title : PAH5437

TIC Library : C:\Database\NIST08.L  
TIC Integration Parameters: rteint.p

\*\*\*\*\*  
Peak Number 13 Heptadecane Concentration Rank 7

| R.T.   | EstConc    | Area     | Relative to ISTD  | R.T.  |
|--------|------------|----------|-------------------|-------|
| 19.956 | 1230.79 ng | 12307900 | External Standard | 0.000 |

| Hit# | of | 5 | Tentative ID | MW  | MolForm | CAS#        | Qual |
|------|----|---|--------------|-----|---------|-------------|------|
| 1    |    |   | Heptadecane  | 240 | C17H36  | 000629-78-7 | 98   |
| 2    |    |   | Heptadecane  | 240 | C17H36  | 000629-78-7 | 98   |
| 3    |    |   | Heptadecane  | 240 | C17H36  | 000629-78-7 | 96   |
| 4    |    |   | Tetradecane  | 198 | C14H30  | 000629-59-4 | 91   |
| 5    |    |   | Hexadecane   | 226 | C16H34  | 000544-76-3 | 91   |

AbundanceScan 2656 (19.956 min): 022912PA--dilute1000.D\data.

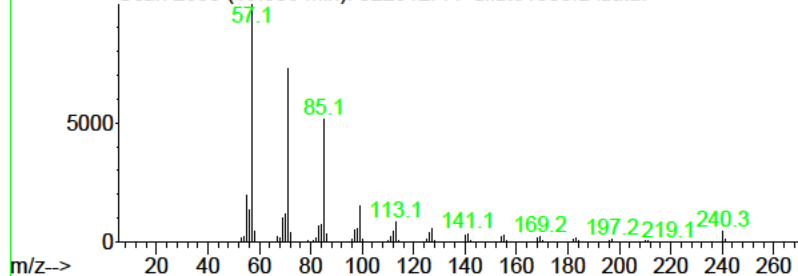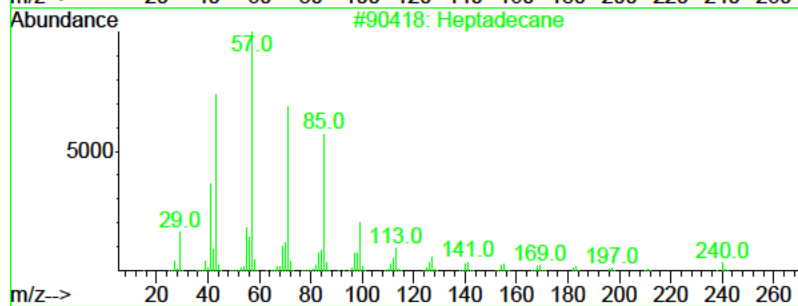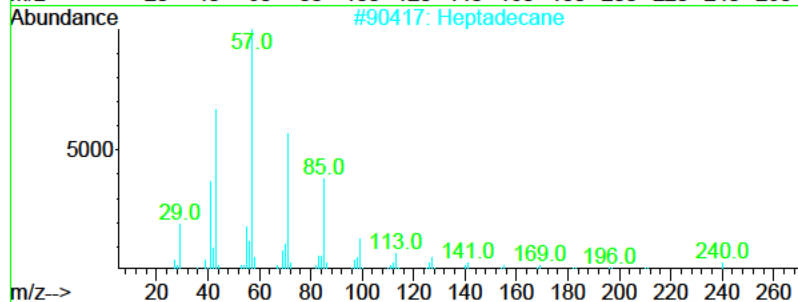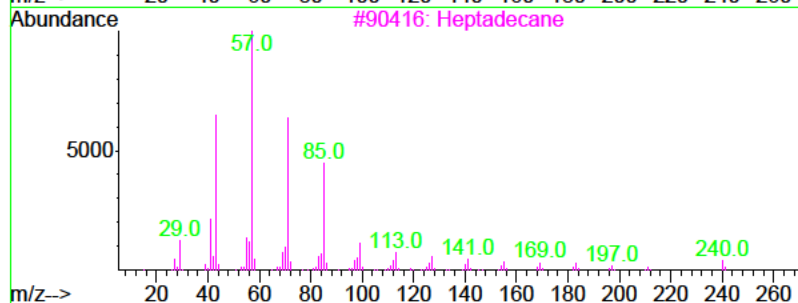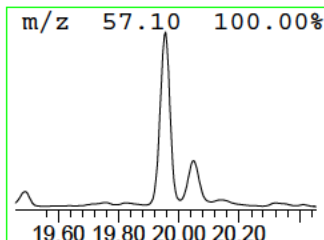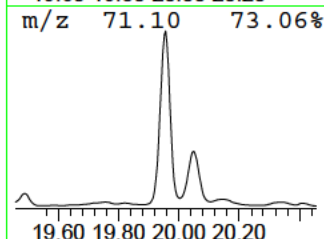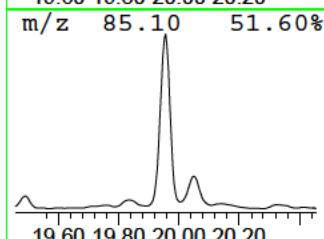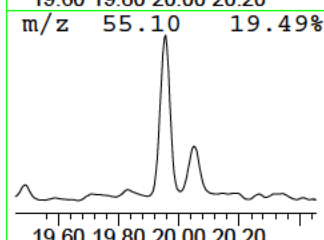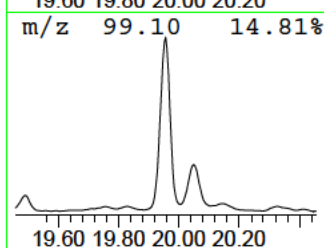

Data Path : C:\msdchem\1\LEGACY\2012\February\  
Data File : 022912PA--dilute1000.D  
Acq On : 29 Feb 2012 10:00  
Operator :  
Sample : PA--dilute1000  
Misc : 1.0 uL 4 mL dilute1000  
ALS Vial : 55 Sample Multiplier: 1

Quant Method : C:\msdchem\1\METHODS\TLTICPAH.M  
Quant Title : PAH5437

TIC Library : C:\Database\NIST08.L  
TIC Integration Parameters: rteint.p

\*\*\*\*\*  
Peak Number 14 Octadecane Concentration Rank 8

| R.T.   | EstConc    | Area     | Relative to ISTD  | R.T.  |
|--------|------------|----------|-------------------|-------|
| 21.557 | 1034.98 ng | 10349800 | External Standard | 0.000 |

| Hit# | of | 5 | Tentative ID | MW  | MolForm | CAS#        | Qual |
|------|----|---|--------------|-----|---------|-------------|------|
| 1    |    |   | Octadecane   | 254 | C18H38  | 000593-45-3 | 98   |
| 2    |    |   | Hexadecane   | 226 | C16H34  | 000544-76-3 | 97   |
| 3    |    |   | Octadecane   | 254 | C18H38  | 000593-45-3 | 95   |
| 4    |    |   | Octadecane   | 254 | C18H38  | 000593-45-3 | 95   |
| 5    |    |   | Heneicosane  | 296 | C21H44  | 000629-94-7 | 91   |

AbundanceScan 3000 (21.557 min): 022912PA-dilute1000.D\data.

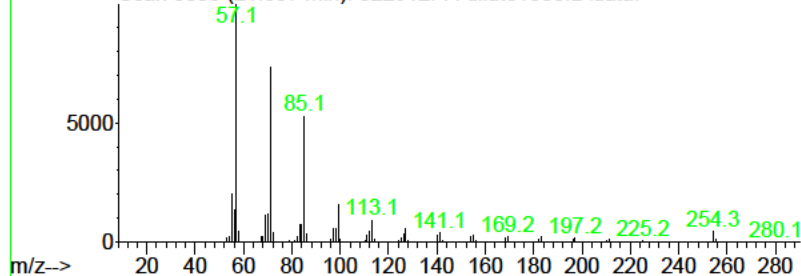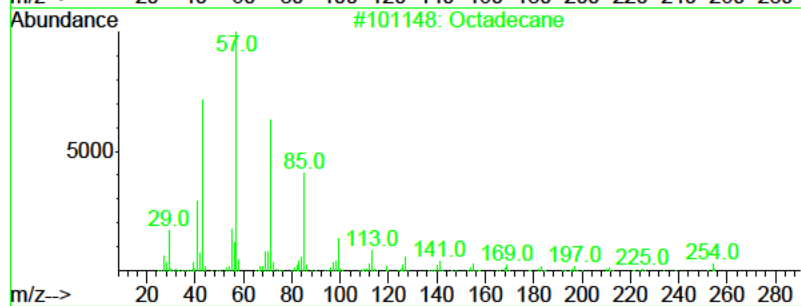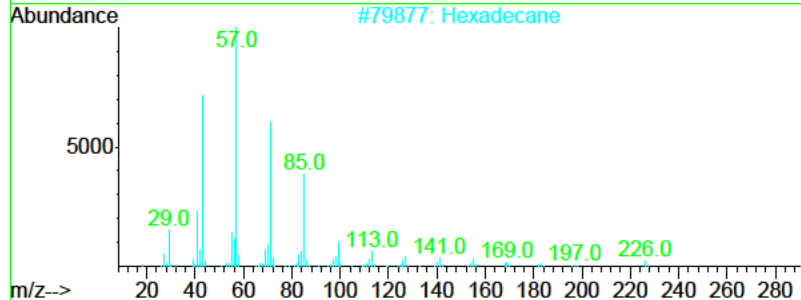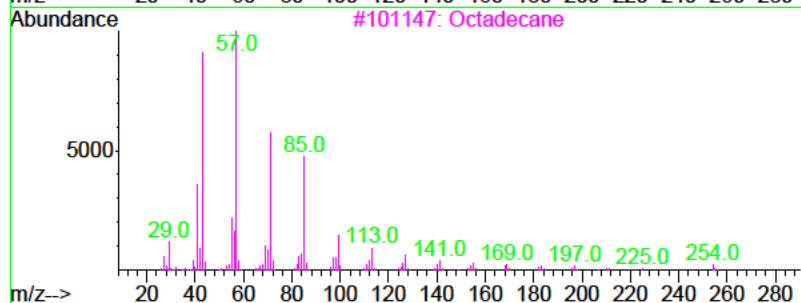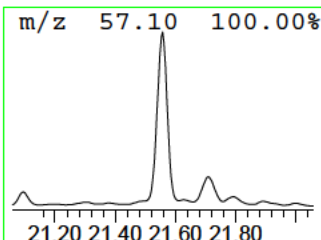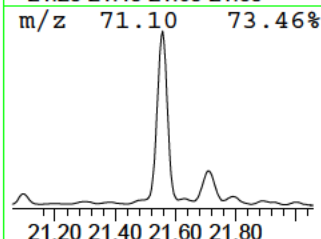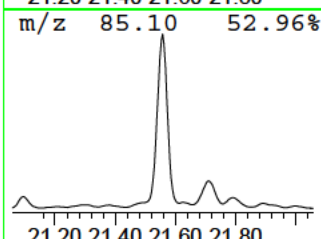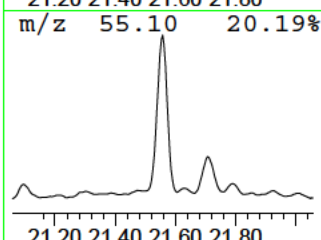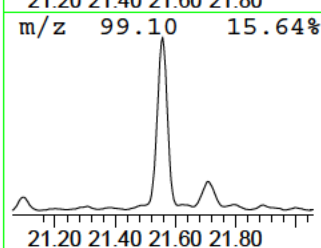

Data Path : C:\msdchem\1\LEGACY\2012\February\  
Data File : 022912PA--dilute1000.D  
Acq On : 29 Feb 2012 10:00  
Operator :  
Sample : PA-dilute1000  
Misc : 1.0 uL 4 mL dilute1000  
ALS Vial : 55 Sample Multiplier: 1

Quant Method : C:\msdchem\1\METHODS\TLTICPAH.M  
Quant Title : PAH5437

TIC Library : C:\Database\NIST08.L  
TIC Integration Parameters: rteint.p

\*\*\*\*\*  
Peak Number 15 Nonadecane Concentration Rank 9

| R.T.   | EstConc   | Area    | Relative to ISTD  | R.T.  |
|--------|-----------|---------|-------------------|-------|
| 23.140 | 981.16 ng | 9811580 | External Standard | 0.000 |

| Hit# | of | 5 | Tentative ID | MW  | MolForm | CAS#        | Qual |
|------|----|---|--------------|-----|---------|-------------|------|
| 1    |    |   | Nonadecane   | 268 | C19H40  | 000629-92-5 | 98   |
| 2    |    |   | Hexadecane   | 226 | C16H34  | 000544-76-3 | 97   |
| 3    |    |   | Hexadecane   | 226 | C16H34  | 000544-76-3 | 97   |
| 4    |    |   | Heptadecane  | 240 | C17H36  | 000629-78-7 | 91   |
| 5    |    |   | Nonadecane   | 268 | C19H40  | 000629-92-5 | 91   |

AbundanceScan 3340 (23.140 min): 022912PA--dilute1000.D\data.

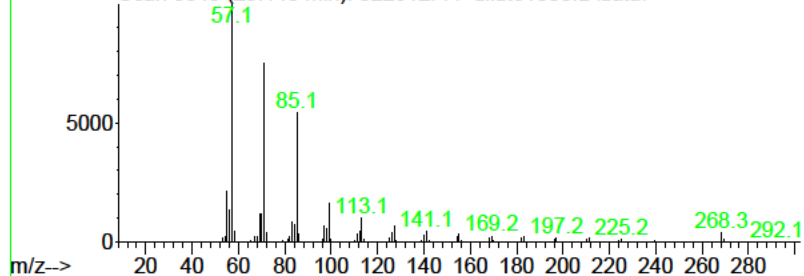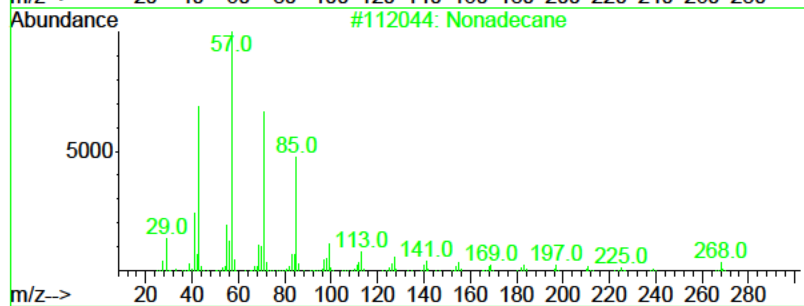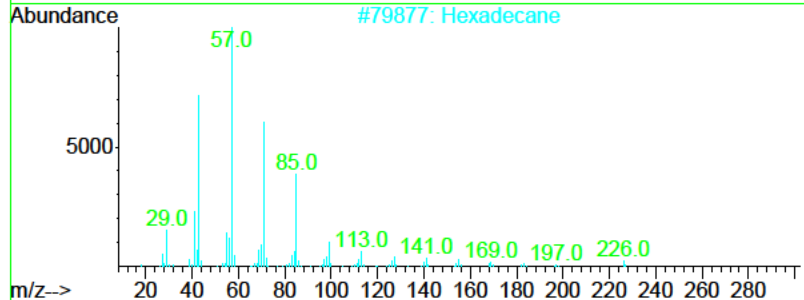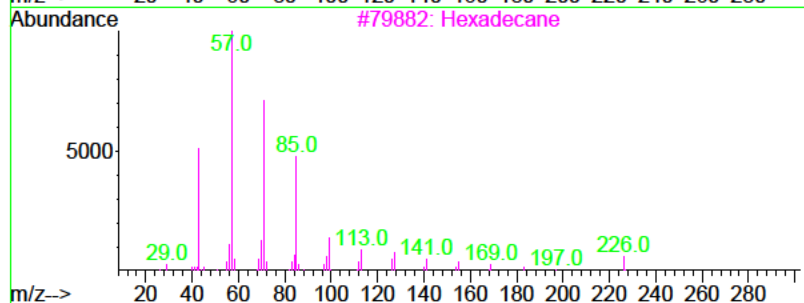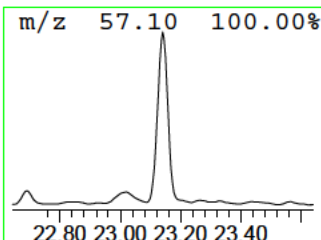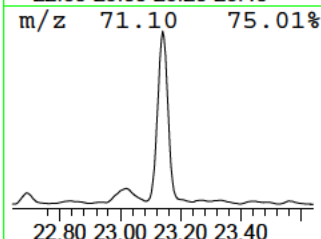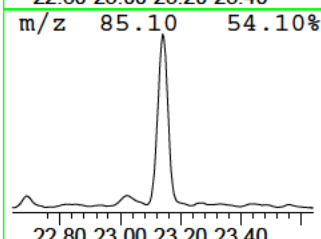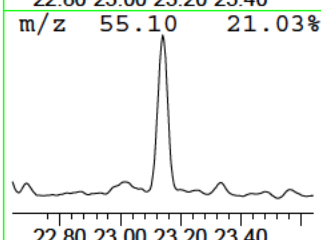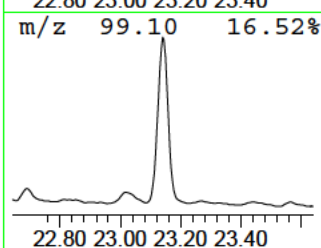

Data Path : C:\msdchem\1\LEGACY\2012\February\  
Data File : 022912PA-dilute1000.D  
Acq On : 29 Feb 2012 10:00  
Operator :  
Sample : PA--dilute1000  
Misc : 1.0 uL 4 mL dilute1000  
ALS Vial : 55 Sample Multiplier: 1

Quant Method : C:\msdchem\1\METHODS\TLTICPAH.M  
Quant Title : PAH5437

TIC Library : C:\Database\NIST08.L  
TIC Integration Parameters: rteint.p

\*\*\*\*\*  
Peak Number 16 Eicosane Concentration Rank 10

| R.T.   | EstConc   | Area    | Relative to ISTD  | R.T.  |
|--------|-----------|---------|-------------------|-------|
| 24.690 | 886.76 ng | 8867570 | External Standard | 0.000 |

| Hit# | of | 5 | Tentative ID | MW  | MolForm | CAS#        | Qual |
|------|----|---|--------------|-----|---------|-------------|------|
| 1    |    |   | Eicosane     | 282 | C20H42  | 000112-95-8 | 98   |
| 2    |    |   | Hexadecane   | 226 | C16H34  | 000544-76-3 | 97   |
| 3    |    |   | Eicosane     | 282 | C20H42  | 000112-95-8 | 95   |
| 4    |    |   | Eicosane     | 282 | C20H42  | 000112-95-8 | 93   |
| 5    |    |   | Hexadecane   | 226 | C16H34  | 000544-76-3 | 93   |

AbundanceScan 3673 (24.690 min): 022912PA--dilute1000.D\data.

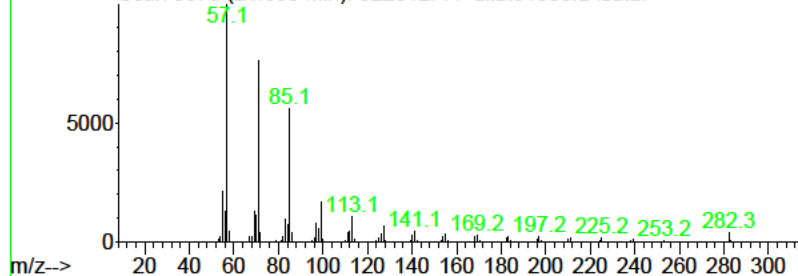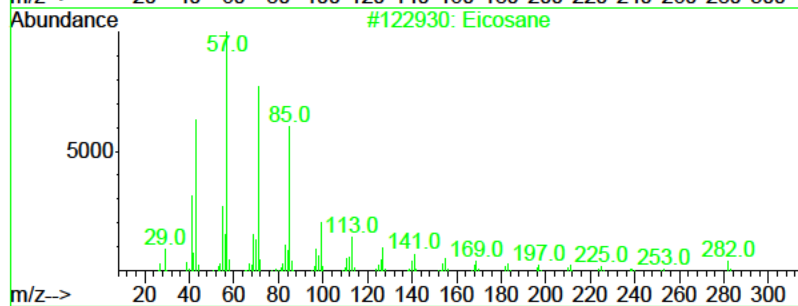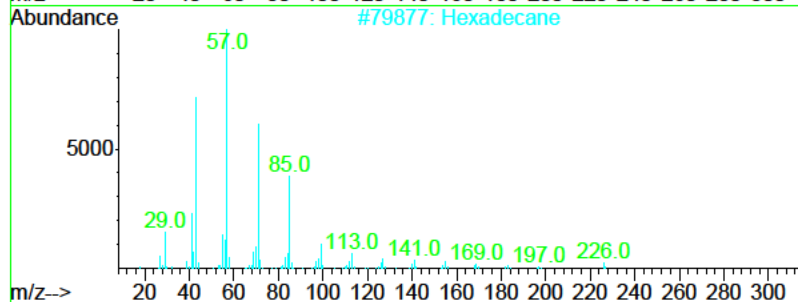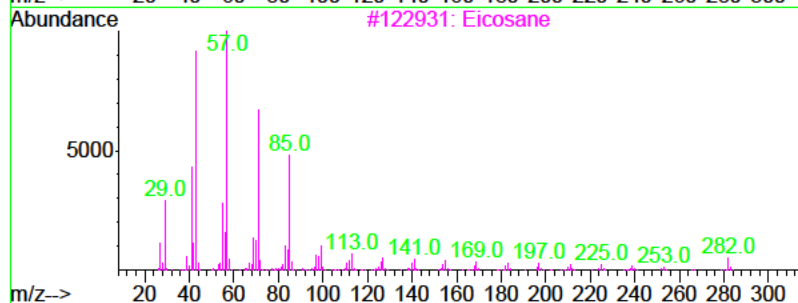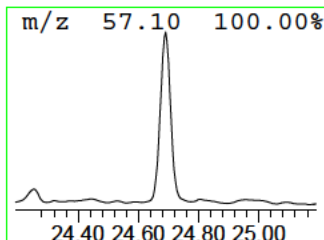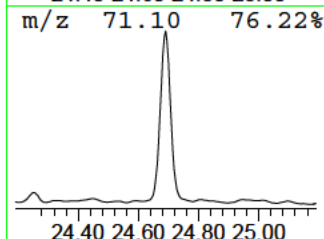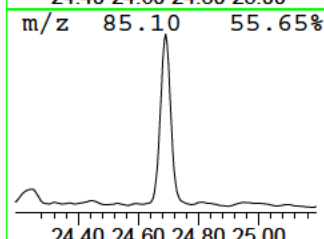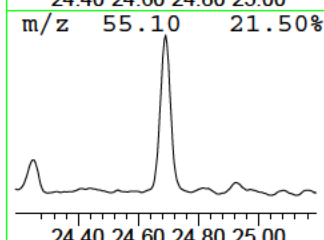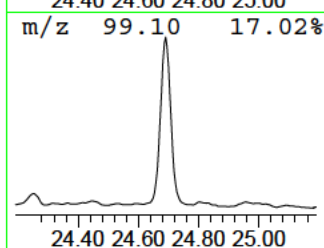

Data Path : C:\msdchem\1\LEGACY\2012\February\  
Data File : 022912PA-dilute1000.D  
Acq On : 29 Feb 2012 10:00  
Operator :  
Sample : PA-dilute1000  
Misc : 1.0 uL 4 mL dilute1000  
ALS Vial : 55 Sample Multiplier: 1

Quant Method : C:\msdchem\1\METHODS\TLTICPAH.M  
Quant Title : PAH5437

TIC Library : C:\Database\NIST08.L  
TIC Integration Parameters: rteint.p

\*\*\*\*\*  
Peak Number 17 Heneicosane Concentration Rank 11

| R.T.   | EstConc   | Area    | Relative to ISTD  | R.T.  |
|--------|-----------|---------|-------------------|-------|
| 26.199 | 744.64 ng | 7446370 | External Standard | 0.000 |

| Hit# | of | 5 | Tentative ID | MW  | MolForm | CAS#        | Qual |
|------|----|---|--------------|-----|---------|-------------|------|
| 1    |    |   | Heneicosane  | 296 | C21H44  | 000629-94-7 | 92   |
| 2    |    |   | Docosane     | 310 | C22H46  | 000629-97-0 | 91   |
| 3    |    |   | Heneicosane  | 296 | C21H44  | 000629-94-7 | 91   |
| 4    |    |   | Eicosane     | 282 | C20H42  | 000112-95-8 | 91   |
| 5    |    |   | Heptacosane  | 380 | C27H56  | 000593-49-7 | 91   |

AbundanceScan 3997 (26.199 min): 022912PA-dilute1000.D\data.

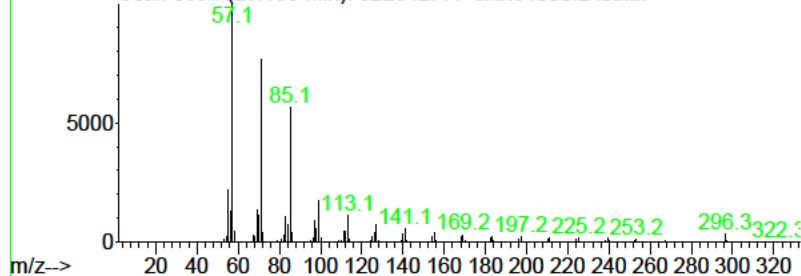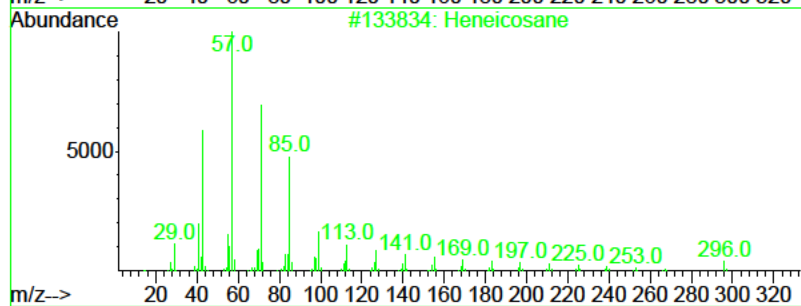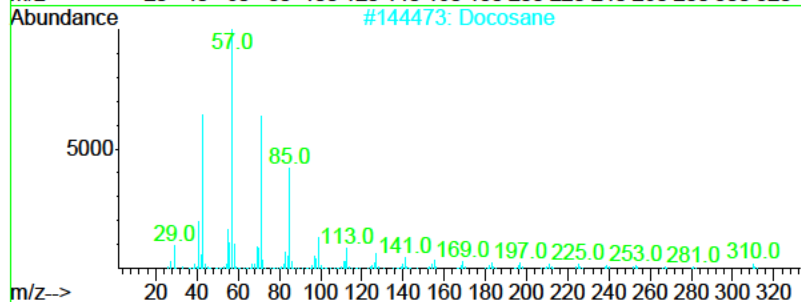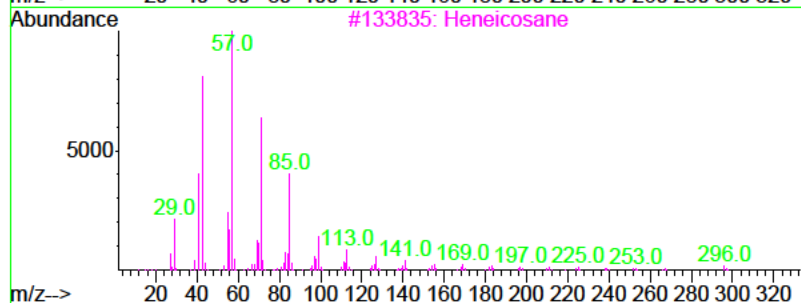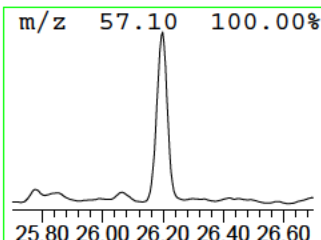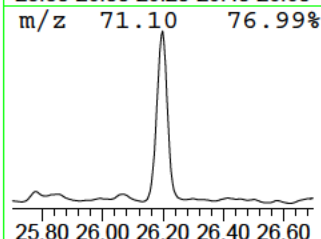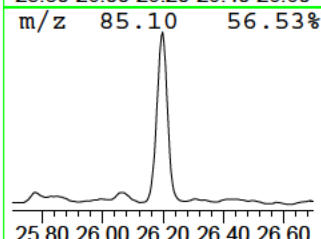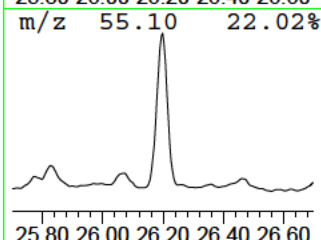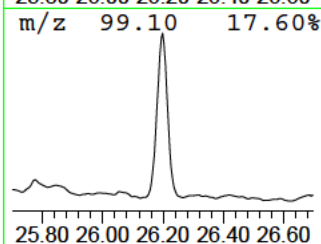

Data Path : C:\msdchem\1\LEGACY\2012\February\  
Data File : 022912PAdilute1000.D  
Acq On : 29 Feb 2012 10:00  
Operator :  
Sample : PA--dilute1000  
Misc : 1.0 uL 4 mL dilute1000  
ALS Vial : 55 Sample Multiplier: 1

Quant Method : C:\msdchem\1\METHODS\TLTICPAH.M  
Quant Title : PAH5437

TIC Library : C:\Database\NIST08.L  
TIC Integration Parameters: rteint.p

\*\*\*\*\*  
Peak Number 18 Heneicosane Concentration Rank 12

| R.T.   | EstConc   | Area    | Relative to ISTD  | R.T.  |
|--------|-----------|---------|-------------------|-------|
| 27.660 | 678.01 ng | 6780130 | External Standard | 0.000 |

| Hit# | of | 5 | Tentative ID | MW  | MolForm | CAS#        | Qual |
|------|----|---|--------------|-----|---------|-------------|------|
| 1    |    |   | Heneicosane  | 296 | C21H44  | 000629-94-7 | 97   |
| 2    |    |   | Heneicosane  | 296 | C21H44  | 000629-94-7 | 96   |
| 3    |    |   | Heptadecane  | 240 | C17H36  | 000629-78-7 | 95   |
| 4    |    |   | Heptadecane  | 240 | C17H36  | 000629-78-7 | 95   |
| 5    |    |   | Heneicosane  | 296 | C21H44  | 000629-94-7 | 95   |

AbundanceScan 4311 (27.660 min): 022912PA-dilute1000.D\data.

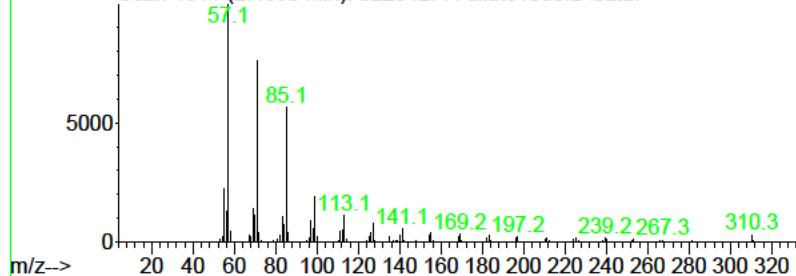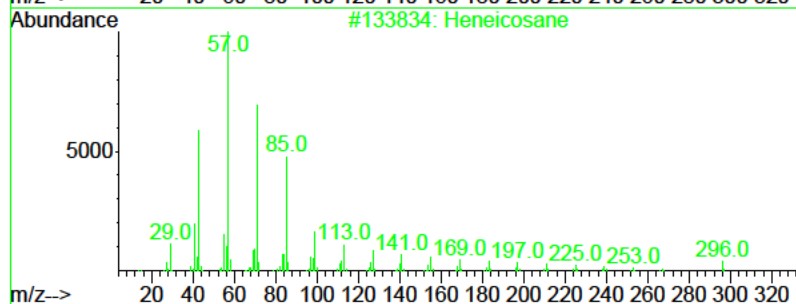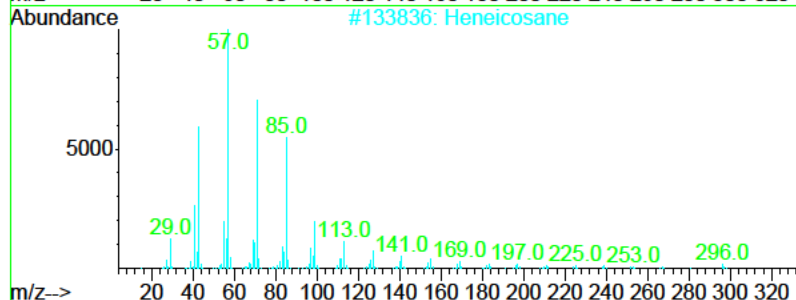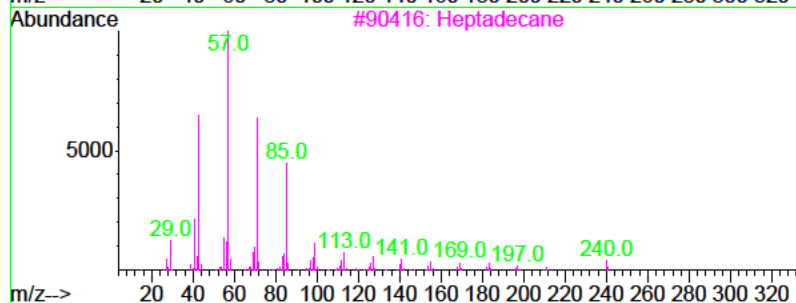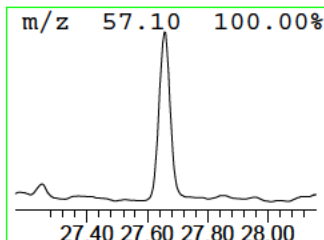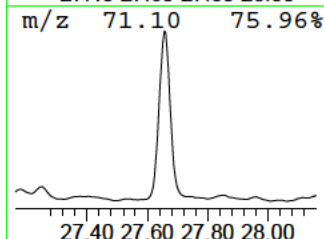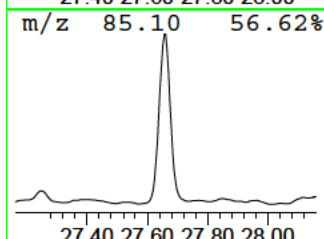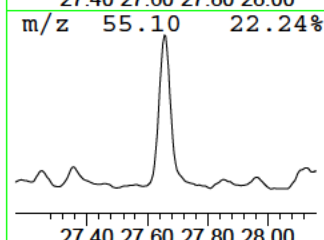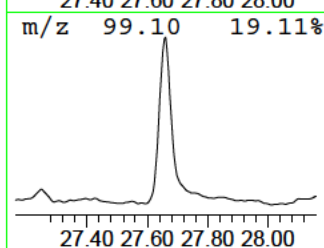

Data Path : C:\msdchem\1\LEGACY\2012\February\  
Data File : 022912PA--dilute1000.D  
Acq On : 29 Feb 2012 10:00  
Operator :  
Sample : PA--dilute1000  
Misc : 1.0 uL 4 mL dilute1000  
ALS Vial : 55 Sample Multiplier: 1

Quant Method : C:\msdchem\1\METHODS\TLTICPAH.M  
Quant Title : PAH5437

TIC Library : C:\Database\NIST08.L  
TIC Integration Parameters: rteint.p

\*\*\*\*\*  
Peak Number 19 Heptadecane Concentration Rank 16

| R.T.   | EstConc   | Area    | Relative to ISTD  | R.T.  |
|--------|-----------|---------|-------------------|-------|
| 29.178 | 484.39 ng | 4843950 | External Standard | 0.000 |

| Hit# | of | 5 | Tentative ID          | MW  | MolForm | CAS#        | Qual |
|------|----|---|-----------------------|-----|---------|-------------|------|
| 1    |    |   | Heptadecane           | 240 | C17H36  | 000629-78-7 | 93   |
| 2    |    |   | Pentadecane, 8-hexyl- | 296 | C21H44  | 013475-75-7 | 93   |
| 3    |    |   | Eicosane, 10-methyl-  | 296 | C21H44  | 054833-23-7 | 93   |
| 4    |    |   | Heptadecane           | 240 | C17H36  | 000629-78-7 | 92   |
| 5    |    |   | Tricosane             | 324 | C23H48  | 000638-67-5 | 92   |

AbundanceScan 4637 (29.178 min): 022912PA--dilute1000.D\data.

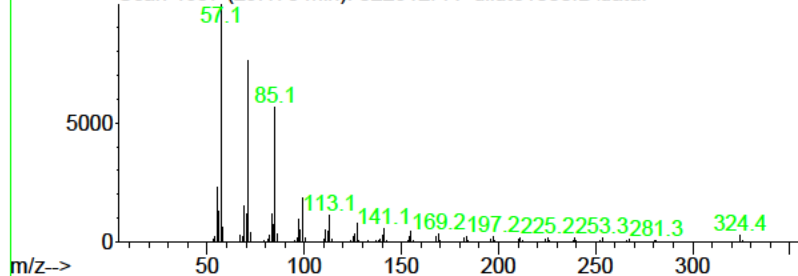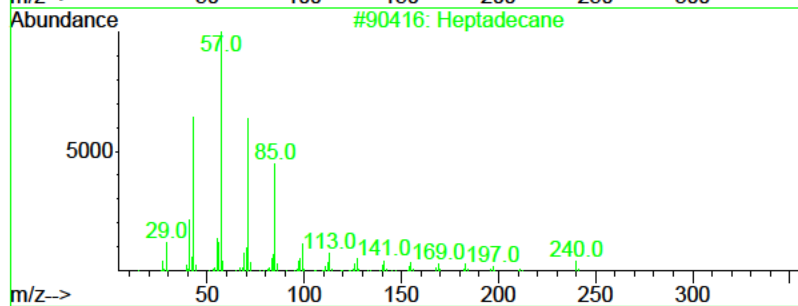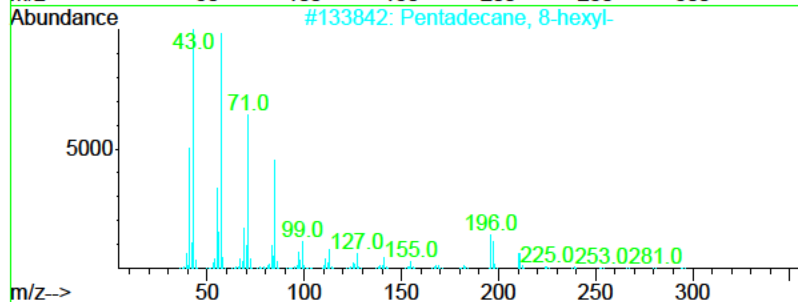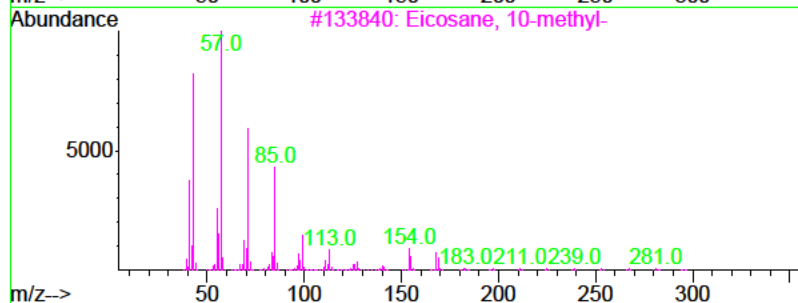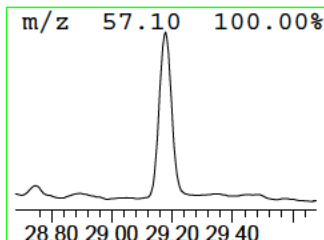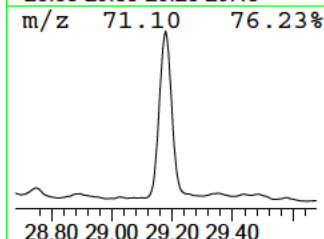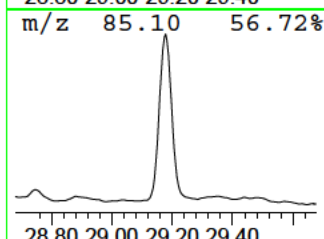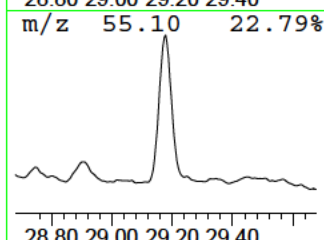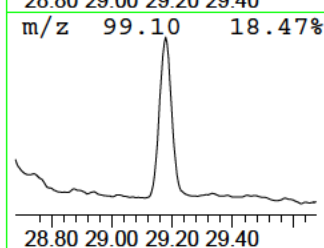

Data Path : C:\msdchem\1\LEGACY\2012\February\  
Data File : 022912PA--dilute1000.D  
Acq On : 29 Feb 2012 10:00  
Operator :  
Sample : PA--dilute1000  
Misc : 1.0 uL 4 mL dilute1000  
ALS Vial : 55 Sample Multiplier: 1

Quant Method : C:\msdchem\1\METHODS\TLTICPAH.M  
Quant Title : PAH5437

TIC Library : C:\Database\NIST08.L  
TIC Integration Parameters: rteint.p

\*\*\*\*\*  
Peak Number 20 Tetracosane Concentration Rank 20

| R.T.   | EstConc   | Area    | Relative to ISTD  | R.T.  |
|--------|-----------|---------|-------------------|-------|
| 30.807 | 384.35 ng | 3843470 | External Standard | 0.000 |

| Hit# | of | 5 | Tentative ID                       | MW  | MolForm  | CAS#        | Qual |
|------|----|---|------------------------------------|-----|----------|-------------|------|
| 1    |    |   | Tetracosane                        | 338 | C24H50   | 000646-31-1 | 99   |
| 2    |    |   | Tetracosane                        | 338 | C24H50   | 000646-31-1 | 98   |
| 3    |    |   | Tetracosane                        | 338 | C24H50   | 000646-31-1 | 97   |
| 4    |    |   | Hexadecane, 2,6,10,14-tetramethyl- | 282 | C20H42   | 000638-36-8 | 97   |
| 5    |    |   | 2-Bromo dodecane                   | 248 | C12H25Br | 013187-99-0 | 95   |

AbundanceScan 4987 (30.807 min): 022912PA--dilute1000.D\data.

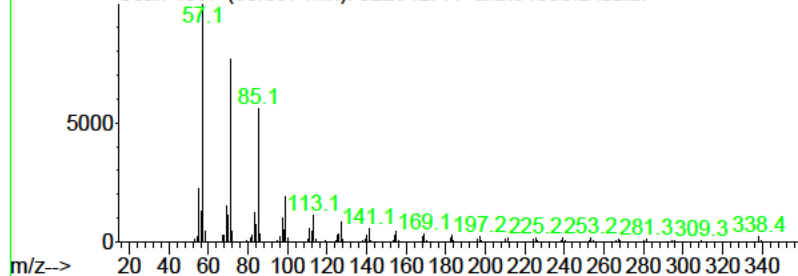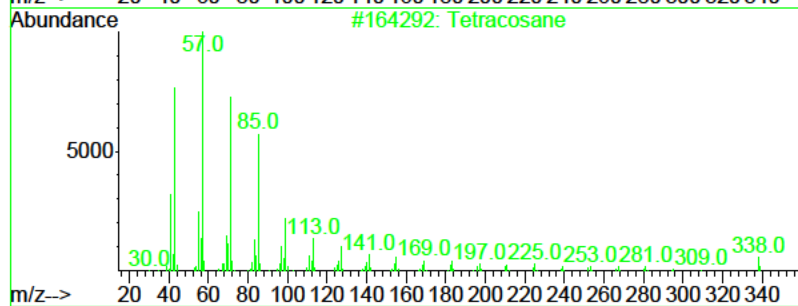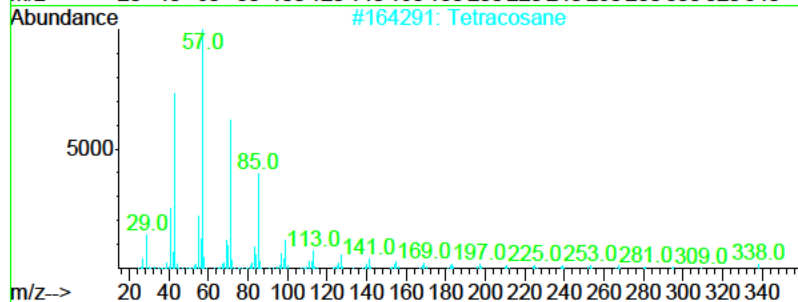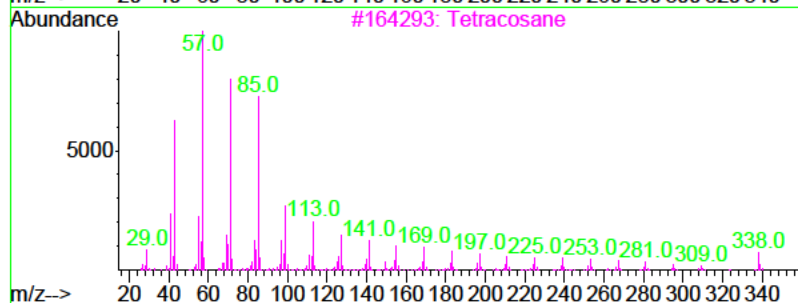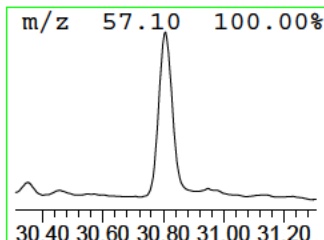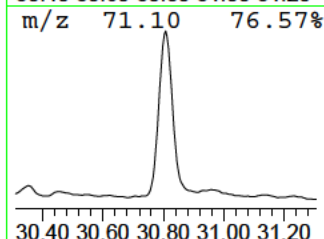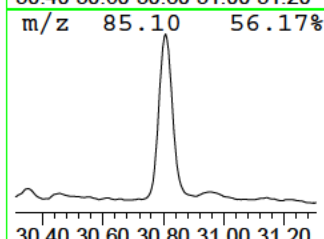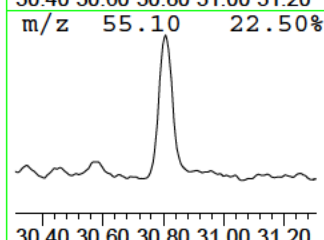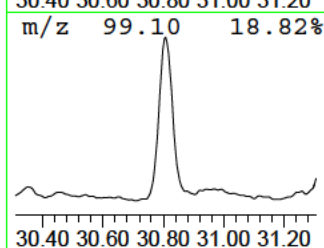

Data Path : C:\msdchem\1\LEGACY\2012\February\  
 Data File : 022912512-dilute1000.D  
 Acq On : 29 Feb 2012 10:00  
 Operator :  
 Sample : PA--dilute1000 : 1.0 uL 4 mL  
 Misc dilute1000  
 ALS Vial : 55 Sample Multiplier: 1

Quant Method : C:\msdchem\1\METHODS\TLTICPAH.M  
 Quant Title : PAH5437

TIC Library : C:\Database\NIST08.L  
 TIC Integration Parameters: rteint.p

| TIC Top Hit name   | RT     | EstConc | Units | Response | --Internal<br># | RT    | Standard---<br>Resp | Conc |
|--------------------|--------|---------|-------|----------|-----------------|-------|---------------------|------|
| Decane             | 8.946  | 1518.9  | ng    | 15188600 | 0               | 0.000 | 10000               | 1.0  |
| Decane, 2-methyl-  | 10.152 | 497.2   | ng    | 4972070  | 0               | 0.000 | 10000               | 1.0  |
| Decane, 3-methyl-  | 10.268 | 402.7   | ng    | 4026590  | 0               | 0.000 | 10000               | 1.0  |
| Undecane           | 10.785 | 3018.0  | ng    | 30179600 | 0               | 0.000 | 10000               | 1.0  |
| 5-Ethyldecane      | 11.707 | 543.8   | ng    | 5438420  | 0               | 0.000 | 10000               | 1.0  |
| Undecane, 2-met... | 11.837 | 457.2   | ng    | 4572430  | 0               | 0.000 | 10000               | 1.0  |
| Dodecane           | 12.410 | 2834.9  | ng    | 28348700 | 0               | 0.000 | 10000               | 1.0  |
| Undecane, 2,6-d... | 12.624 | 473.7   | ng    | 4736940  | 0               | 0.000 | 10000               | 1.0  |
| Tridecane          | 13.881 | 2298.2  | ng    | 22981500 | 0               | 0.000 | 10000               | 1.0  |
| Tetradecane        | 15.310 | 1735.6  | ng    | 17355500 | 0               | 0.000 | 10000               | 1.0  |
| Hexadecane         | 16.232 | 498.8   | ng    | 4987600  | 0               | 0.000 | 10000               | 1.0  |
| Pentadecane        | 16.804 | 1607.3  | ng    | 16073000 | 0               | 0.000 | 10000               | 1.0  |
| Heptadecane        | 19.956 | 1230.8  | ng    | 12307900 | 0               | 0.000 | 10000               | 1.0  |
| Octadecane         | 21.557 | 1035.0  | ng    | 10349800 | 0               | 0.000 | 10000               | 1.0  |
| Nonadecane         | 23.140 | 981.2   | ng    | 9811580  | 0               | 0.000 | 10000               | 1.0  |
| Eicosane           | 24.690 | 886.8   | ng    | 8867570  | 0               | 0.000 | 10000               | 1.0  |
| Heneicosane        | 26.199 | 744.6   | ng    | 7446370  | 0               | 0.000 | 10000               | 1.0  |
| Heneicosane        | 27.660 | 678.0   | ng    | 6780130  | 0               | 0.000 | 10000               | 1.0  |
| Heptadecane        | 29.178 | 484.4   | ng    | 4843950  | 0               | 0.000 | 10000               | 1.0  |
| Tetracosane        | 30.807 | 384.3   | ng    | 3843470  | 0               | 0.000 | 10000               | 1.0  |
