# Supplementary material
Source: publisher figshare collection journal article supplement (https://wiley.figshare.com/articles/dataset/_/6176210)
Supplement: Supplementary file 17 [file 1]

## Document information

|                                         |                                                     |                   |
|-----------------------------------------|-----------------------------------------------------|-------------------|
| Software:                               | realplex 2.2                                        |                   |
| File Name:                              | Voytek\Runs\RT2PCRRArray ionic strength IS17 092513 |                   |
| Printed by:                             | Voytek                                              |                   |
| Created:                                | Sep/25/2013 17:00                                   |                   |
| Serial No. Thermo Module:               | 6325 30342                                          |                   |
| Serial No. realplex Module.:            | 630011432                                           |                   |
| Acquisition Start Time:                 | Voytek                                              | Sep/25/2013 17:55 |
| Acquisition End Time:                   | Voytek                                              | Sep/25/2013 19:46 |
| Last updated:                           | Voytek                                              | Mar/14/2012 13:10 |
| Background:                             | SABioscience A Plate                                | Mar/14/2012 10:34 |
| Color Calibration:                      | SYBR                                                | Jun/23/2011 09:04 |
| RT2PCRRArray ionic strength IS17 092513 | Quantification                                      | Sep/26/2013 08:39 |
| Inverted Data:                          | OFF                                                 |                   |
| Comment:                                |                                                     |                   |

## Plate layout

|   | 1    | 2    | 3    | 4    | 5    | 6    | 7    | 8    | 9    | 10   | 11   | 12   |
|---|------|------|------|------|------|------|------|------|------|------|------|------|
| A | IS17 |
| B | IS17 |
| C | IS17 |
| D | IS17 |
| E | IS17 |
| F | IS17 |
| G | IS17 |
| H | IS17 |

## PCR Program

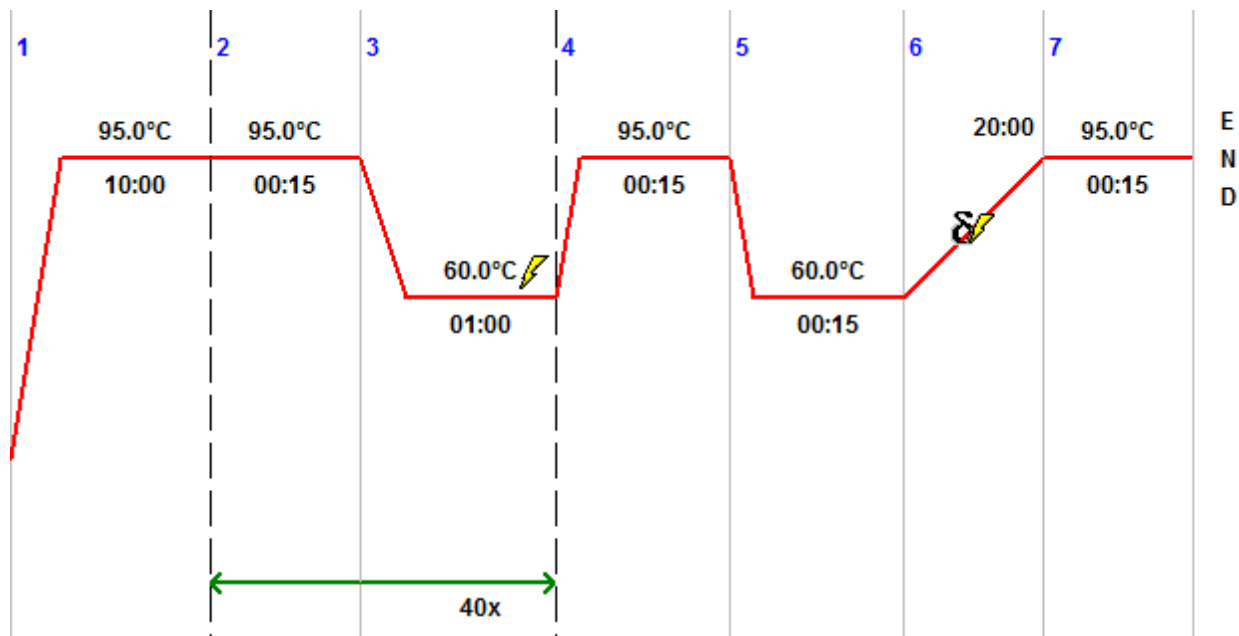

### Program Header

|            |          |                                  |     |
|------------|----------|----------------------------------|-----|
| Lid Temp   | 105 °C   | TSP Heated Lid                   | Yes |
| Temp. Mode | Standard | Switch off lid at low block temp | No  |
| Impulse    | No       | Simulate Mastercycler gradient   | No  |

### Program Details

Step 3 Ramp =26%

## Raw Data SYBR

### Fluorescence Profile

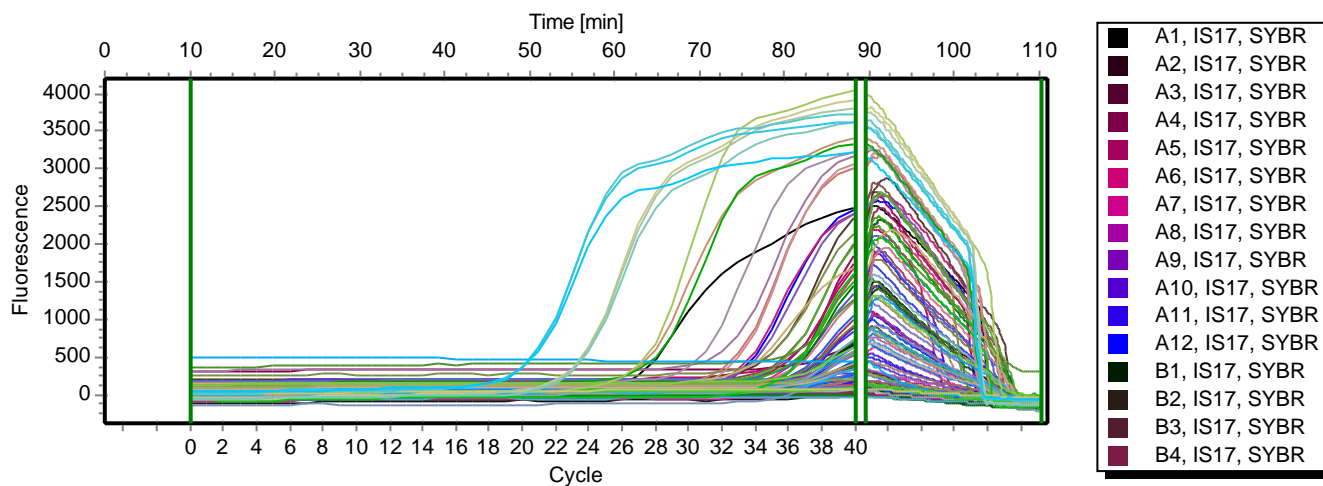

### Temperature Profile

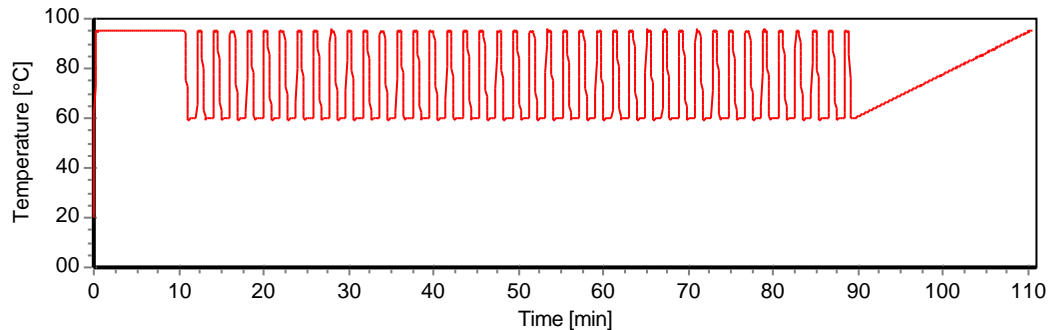

## Quantification SYBR

| Pos                                                                                    | Name | Ct SYBR | Amount SYBR | Target SYBR |
|----------------------------------------------------------------------------------------|------|---------|-------------|-------------|
|  A1    | IS17 | 24.68   | -           | unknown     |
|  A2    | IS17 | 35.31   | -           | unknown     |
|  A3    | IS17 |         | -           | unknown     |
|  A4    | IS17 | 36.30   | -           | unknown     |
|  A5    | IS17 | 34.13   | -           | unknown     |
|  A6    | IS17 | 34.01   | -           | unknown     |
|  A7    | IS17 | 38.31   | -           | unknown     |
|  A8    | IS17 |         | -           | unknown     |
|  A9    | IS17 | 35.17   | -           | unknown     |
|  A10   | IS17 | 35.39   | -           | unknown     |
|  A11   | IS17 | 20.89   | -           | unknown     |
|  A12   | IS17 | 30.87   | -           | unknown     |
|  B1  | IS17 |         | -           | unknown     |
|  B2  | IS17 |         | -           | unknown     |
|  B3  | IS17 |         | -           | unknown     |
|  B4  | IS17 |         | -           | unknown     |
|  B5  | IS17 | 34.24   | -           | unknown     |
|  B6  | IS17 | 30.98   | -           | unknown     |
|  B7  | IS17 | 35.91   | -           | unknown     |
|  B8  | IS17 |         | -           | unknown     |
|  B9  | IS17 |         | -           | unknown     |
|  B10 | IS17 | 37.41   | -           | unknown     |
|  B11 | IS17 | 37.63   | -           | unknown     |
|  B12 | IS17 | 36.18   | -           | unknown     |
|  C1  | IS17 | 35.47   | -           | unknown     |
|  C2  | IS17 |         | -           | unknown     |
|  C3  | IS17 | 33.03   | -           | unknown     |
|  C4  | IS17 |         | -           | unknown     |
|  C5  | IS17 | 34.85   | -           | unknown     |
|  C6  | IS17 | 34.21   | -           | unknown     |
|  C7  | IS17 | 37.20   | -           | unknown     |
|  C8  | IS17 | 35.63   | -           | unknown     |
|  C9  | IS17 |         | -           | unknown     |
|  C10 | IS17 |         | -           | unknown     |
|  C11 | IS17 | 35.17   | -           | unknown     |
|  C12 | IS17 | 36.73   | -           | unknown     |

| Pos                                                                                                                                                                        | Name | Ct SYBR | Amount SYBR | Target SYBR |
|----------------------------------------------------------------------------------------------------------------------------------------------------------------------------|------|---------|-------------|-------------|
|   D1      | IS17 |         | -           | unknown     |
|   D2      | IS17 | 23.97   | -           | unknown     |
|   D3      | IS17 | 36.05   | -           | unknown     |
|   D4      | IS17 | 33.98   | -           | unknown     |
|   D5      | IS17 |         | -           | unknown     |
|   D6      | IS17 |         | -           | unknown     |
|   D7      | IS17 | 36.86   | -           | unknown     |
|   D8      | IS17 |         | -           | unknown     |
|   D9      | IS17 | 31.80   | -           | unknown     |
|   D10     | IS17 | 34.61   | -           | unknown     |
|   D11     | IS17 | 34.99   | -           | unknown     |
|   D12     | IS17 |         | -           | unknown     |
|   E1      | IS17 | 34.45   | -           | unknown     |
|   E2      | IS17 | 36.41   | -           | unknown     |
|   E3      | IS17 | 35.54   | -           | unknown     |
|   E4      | IS17 | 35.21   | -           | unknown     |
|   E5      | IS17 | 37.84   | -           | unknown     |
|   E6  | IS17 | 30.66   | -           | unknown     |
|   E7  | IS17 | 34.42   | -           | unknown     |
|   E8  | IS17 | 30.76   | -           | unknown     |
|   E9  | IS17 | 35.73   | -           | unknown     |
|   E10 | IS17 |         | -           | unknown     |
|   E11 | IS17 | 36.48   | -           | unknown     |
|   E12 | IS17 | 37.20   | -           | unknown     |
|   F1  | IS17 |         | -           | unknown     |
|   F2  | IS17 | 35.83   | -           | unknown     |
|   F3  | IS17 | 35.04   | -           | unknown     |
|   F4  | IS17 | 33.37   | -           | unknown     |
|   F5  | IS17 | 35.86   | -           | unknown     |
|   F6  | IS17 | 25.45   | -           | unknown     |
|   F7  | IS17 | 30.48   | -           | unknown     |
|   F8  | IS17 | 28.87   | -           | unknown     |
|   F9  | IS17 | 34.92   | -           | unknown     |
|   F10 | IS17 |         | -           | unknown     |
|   F11 | IS17 | 36.90   | -           | unknown     |
|   F12 | IS17 | 35.56   | -           | unknown     |
|   G1  | IS17 | 26.04   | -           | unknown     |
|   G2  | IS17 | 34.49   | -           | unknown     |
|   G3  | IS17 | 33.80   | -           | unknown     |
|   G4  | IS17 |         | -           | unknown     |

| Pos                                                                                                                                                                        | Name | Ct SYBR | Amount SYBR | Target SYBR |
|----------------------------------------------------------------------------------------------------------------------------------------------------------------------------|------|---------|-------------|-------------|
|   G5      | IS17 | 36.62   | -           | unknown     |
|   G6      | IS17 | 32.00   | -           | unknown     |
|   G7      | IS17 | 36.78   | -           | unknown     |
|   G8      | IS17 |         | -           | unknown     |
|   G9      | IS17 | 35.21   | -           | unknown     |
|   G10     | IS17 |         | -           | unknown     |
|   G11     | IS17 | 36.28   | -           | unknown     |
|   G12     | IS17 |         | -           | unknown     |
|   H1      | IS17 | 33.98   | -           | unknown     |
|   H2      | IS17 |         | -           | unknown     |
|   H3      | IS17 |         | -           | unknown     |
|   H4      | IS17 | 35.82   | -           | unknown     |
|   H5      | IS17 | 25.17   | -           | unknown     |
|   H6      | IS17 |         | -           | unknown     |
|   H7      | IS17 | 21.01   | -           | unknown     |
|   H8      | IS17 | 20.76   | -           | unknown     |
|   H9      | IS17 | 21.20   | -           | unknown     |
|   H10 | IS17 | 18.22   | -           | unknown     |
|   H11 | IS17 | 18.28   | -           | unknown     |
|   H12 | IS17 | 18.37   | -           | unknown     |

## Amplification Plot

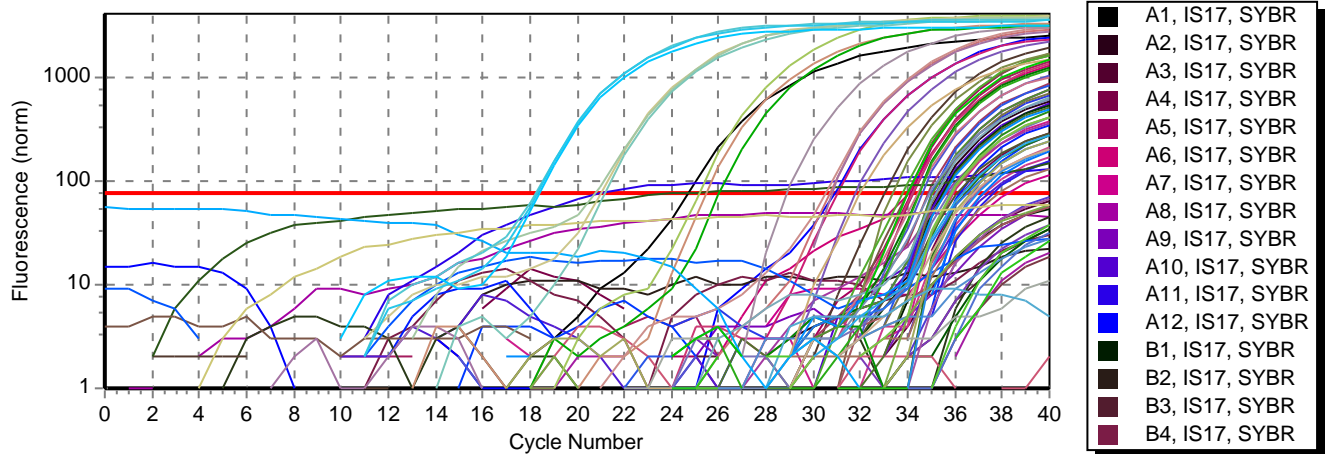

Threshold 76 (Noiseband)

Baseline automatic, Drift correction OFF
